# Supplementary material for: The Archaeome's Role in Colorectal Cancer: Unveiling the DPANN Group and Investigating Archaeal Functional Signatures
Source: Preprints.org preprint supplement (doi:10.20944/preprints202308.1572.v1), 2023-08-22
Supplement: Supplementary file 1 [file Supplementary data S1 (Participant characterization).xlsx]

## Sheet: Participant characterization
#ID	Project n°	RUN accession	Sequencing	Age	Sex	Localization	Status	Reference
100100	PRJEB7774	ERR688505	Metagenomics	64	Male	Austria	CRC	[29]
100101	PRJEB7774	ERR688506	Metagenomics	68	Male	Austria	Healthy	[29]
100102	PRJEB7774	ERR688507	Metagenomics	60	Female	Austria	Healthy	[29]
100103	PRJEB7774	ERR688509	Metagenomics	68	Male	Austria	Healthy	[29]
100104	PRJEB7774	ERR688510	Metagenomics	66	Male	Austria	Healthy	[29]
100105	PRJEB7774	ERR688511	Metagenomics	73	Male	Austria	Healthy	[29]
100107	PRJEB7774	ERR688514	Metagenomics	67	Female	Austria	Healthy	[29]
100108	PRJEB7774	ERR688515	Metagenomics	65	Male	Austria	CRC	[29]
100109	PRJEB7774	ERR688516	Metagenomics	74	Female	Austria	Healthy	[29]
100110	PRJEB7774	ERR688517	Metagenomics	65	Female	Austria	CRC	[29]
100111	PRJEB7774	ERR688520	Metagenomics	65	Male	Austria	Healthy	[29]
100112	PRJEB7774	ERR688521	Metagenomics	67	Male	Austria	CRC	[29]
100113	PRJEB7774	ERR688523	Metagenomics	67	Male	Austria	Healthy	[29]
100114	PRJEB7774	ERR688525	Metagenomics	82	Male	Austria	CRC	[29]
100115	PRJEB7774	ERR688527	Metagenomics	84	Male	Austria	CRC	[29]
100116	PRJEB7774	ERR688528	Metagenomics	68	Female	Austria	Healthy	[29]
100117	PRJEB7774	ERR688529	Metagenomics	63	Male	Austria	Healthy	[29]
100118	PRJEB7774	ERR688530	Metagenomics	68	Male	Austria	Healthy	[29]
100119	PRJEB7774	ERR688532	Metagenomics	72	Male	Austria	Healthy	[29]
100120	PRJEB7774	ERR688563	Metagenomics	69	Female	Austria	Healthy	[29]
100151	PRJEB7774	ERR688564	Metagenomics	70	Male	Austria	Healthy	[29]
100152	PRJEB7774	ERR688565	Metagenomics	66	Male	Austria	Healthy	[29]
100153	PRJEB7774	ERR688566	Metagenomics	73	Female	Austria	Healthy	[29]
100154	PRJEB7774	ERR688567	Metagenomics	54	Male	Austria	CRC	[29]
100155	PRJEB7774	ERR688568	Metagenomics	55	Female	Austria	CRC	[29]
100156	PRJEB7774	ERR688569	Metagenomics	73	Female	Austria	CRC	[29]
100157	PRJEB7774	ERR688570	Metagenomics	64	Female	Austria	CRC	[29]
100158	PRJEB7774	ERR688571	Metagenomics	63	Male	Austria	CRC	[29]
100159	PRJEB7774	ERR688572	Metagenomics	72	Male	Austria	CRC	[29]
100160	PRJEB7774	ERR688573	Metagenomics	46	Male	Austria	CRC	[29]
100161	PRJEB7774	ERR688574	Metagenomics	73	Male	Austria	CRC	[29]
100162	PRJEB7774	ERR688575	Metagenomics	74	Female	Austria	CRC	[29]
100163	PRJEB7774	ERR688576	Metagenomics	58	Male	Austria	CRC	[29]
100164	PRJEB7774	ERR688577	Metagenomics	56	Female	Austria	CRC	[29]
100165	PRJEB7774	ERR688578	Metagenomics	72	Female	Austria	CRC	[29]
100166	PRJEB7774	ERR688579	Metagenomics	52	Female	Austria	CRC	[29]
100167	PRJEB7774	ERR688580	Metagenomics	71	Male	Austria	CRC	[29]
100171	PRJEB7774	ERR688590	Metagenomics	71	Female	Austria	Healthy	[29]
100172	PRJEB7774	ERR688591	Metagenomics	64	Male	Austria	Healthy	[29]
100173	PRJEB7774	ERR688593	Metagenomics	64	Male	Austria	Healthy	[29]
100174	PRJEB7774	ERR688594	Metagenomics	68	Female	Austria	Healthy	[29]
100175	PRJEB7774	ERR688595	Metagenomics	63	Male	Austria	Healthy	[29]
100176	PRJEB7774	ERR688596	Metagenomics	70	Male	Austria	Healthy	[29]
100179	PRJEB7774	ERR688600	Metagenomics	72	Female	Austria	Healthy	[29]
2008	PRJEB27928	ERR2726404	Metagenomics	45	Male	Germany	Healthy	[30]
2009	PRJEB27928	ERR2726405	Metagenomics	62	Female	Germany	Healthy	[30]
20010	PRJEB27928	ERR2726406	Metagenomics	74	Male	Germany	Healthy	[30]
20011	PRJEB27928	ERR2726407	Metagenomics	59	Female	Germany	Healthy	[30]
20012	PRJEB27928	ERR2726408	Metagenomics	59	Female	Germany	Healthy	[30]
20013	PRJEB27928	ERR2726409	Metagenomics	62	Female	Germany	Healthy	[30]
20014	PRJEB27928	ERR2726410	Metagenomics	63	Female	Germany	CRC	[30]
20015	PRJEB27928	ERR2726411	Metagenomics	85	Female	Germany	CRC	[30]
20016	PRJEB27928	ERR2726412	Metagenomics	85	Female	Germany	CRC	[30]
20017	PRJEB27928	ERR2726413	Metagenomics	85	Female	Germany	CRC	[30]
20018	PRJEB27928	ERR2726414	Metagenomics	85	Female	Germany	CRC	[30]
20019	PRJEB27928	ERR2726415	Metagenomics	80	Male	Germany	CRC	[30]
20020	PRJEB27928	ERR2726416	Metagenomics	80	Male	Germany	CRC	[30]
20021	PRJEB27928	ERR2726417	Metagenomics	80	Male	Germany	CRC	[30]
20022	PRJEB27928	ERR2726418	Metagenomics	80	Male	Germany	CRC	[30]
20023	PRJEB27928	ERR2726419	Metagenomics	50	Female	Germany	Healthy	[30]
20024	PRJEB27928	ERR2726420	Metagenomics	61	Male	Germany	Healthy	[30]
20025	PRJEB27928	ERR2726421	Metagenomics	59	Female	Germany	Healthy	[30]
20026	PRJEB27928	ERR2726422	Metagenomics	50	Male	Germany	Healthy	[30]
20027	PRJEB27928	ERR2726423	Metagenomics	81	Male	Germany	CRC	[30]
20028	PRJEB27928	ERR2726424	Metagenomics	81	Male	Germany	CRC	[30]
20029	PRJEB27928	ERR2726425	Metagenomics	81	Male	Germany	CRC	[30]
20030	PRJEB27928	ERR2726426	Metagenomics	81	Male	Germany	CRC	[30]
20031	PRJEB27928	ERR2726427	Metagenomics	55	Female	Germany	Healthy	[30]
20032	PRJEB27928	ERR2726428	Metagenomics	73	Male	Germany	Healthy	[30]
20033	PRJEB27928	ERR2726429	Metagenomics	45	Male	Germany	Healthy	[30]
20034	PRJEB27928	ERR2726430	Metagenomics	51	Male	Germany	Healthy	[30]
20035	PRJEB27928	ERR2726431	Metagenomics	48	Female	Germany	Healthy	[30]
20036	PRJEB27928	ERR2726432	Metagenomics	64	Male	Germany	Healthy	[30]
20037	PRJEB27928	ERR2726433	Metagenomics	75	Male	Germany	Healthy	[30]
20038	PRJEB27928	ERR2726434	Metagenomics	57	Female	Germany	Healthy	[30]
20039	PRJEB27928	ERR2726435	Metagenomics	64	Male	Germany	Healthy	[30]
20040	PRJEB27928	ERR2726436	Metagenomics	60	Female	Germany	Healthy	[30]
20041	PRJEB27928	ERR2726437	Metagenomics	61	Male	Germany	CRC	[30]
20042	PRJEB27928	ERR2726438	Metagenomics	61	Male	Germany	CRC	[30]
20043	PRJEB27928	ERR2726439	Metagenomics	61	Male	Germany	CRC	[30]
20044	PRJEB27928	ERR2726440	Metagenomics	61	Male	Germany	Healthy	[30]
20045	PRJEB27928	ERR2726441	Metagenomics	29	Female	Germany	Healthy	[30]
20046	PRJEB27928	ERR2726442	Metagenomics	44	Male	Germany	Healthy	[30]
20047	PRJEB27928	ERR2726443	Metagenomics	76	Male	Germany	Healthy	[30]
20048	PRJEB27928	ERR2726444	Metagenomics	56	Male	Germany	Healthy	[30]
20049	PRJEB27928	ERR2726453	Metagenomics	61	Male	Germany	CRC	[30]
20050	PRJEB27928	ERR2726454	Metagenomics	61	Male	Germany	CRC	[30]
20051	PRJEB27928	ERR2726455	Metagenomics	61	Male	Germany	CRC	[30]
20052	PRJEB27928	ERR2726456	Metagenomics	61	Male	Germany	CRC	[30]
20053	PRJEB27928	ERR2726457	Metagenomics	46	Male	Germany	Healthy	[30]
20054	PRJEB27928	ERR2726458	Metagenomics	64	Male	Germany	Healthy	[30]
20055	PRJEB27928	ERR2726459	Metagenomics	63	Female	Germany	Healthy	[30]
20056	PRJEB27928	ERR2726460	Metagenomics	75	Male	Germany	Healthy	[30]
20057	PRJEB27928	ERR2726461	Metagenomics	50	Male	Germany	Healthy	[30]
20058	PRJEB27928	ERR2726462	Metagenomics	65	Male	Germany	Healthy	[30]
20059	PRJEB27928	ERR2726463	Metagenomics	79	Male	Germany	CRC	[30]
20060	PRJEB27928	ERR2726464	Metagenomics	79	Male	Germany	CRC	[30]
20061	PRJEB27928	ERR2726465	Metagenomics	79	Male	Germany	CRC	[30]
20062	PRJEB27928	ERR2726466	Metagenomics	79	Male	Germany	CRC	[30]
20063	PRJEB27928	ERR2726467	Metagenomics	81	Male	Germany	CRC	[30]
20064	PRJEB27928	ERR2726468	Metagenomics	81	Male	Germany	CRC	[30]
20065	PRJEB27928	ERR2726469	Metagenomics	81	Male	Germany	CRC	[30]
20066	PRJEB27928	ERR2726470	Metagenomics	81	Male	Germany	CRC	[30]
20067	PRJEB27928	ERR2726471	Metagenomics	61	Male	Germany	Healthy	[30]
20068	PRJEB27928	ERR2726472	Metagenomics	75	Female	Germany	Healthy	[30]
20069	PRJEB27928	ERR2726473	Metagenomics	57	Female	Germany	Healthy	[30]
20070	PRJEB27928	ERR2726474	Metagenomics	66	Male	Germany	Healthy	[30]
20071	PRJEB27928	ERR2726475	Metagenomics	64	Male	Germany	Healthy	[30]
20072	PRJEB27928	ERR2726476	Metagenomics	61	Female	Germany	CRC	[30]
20073	PRJEB27928	ERR2726477	Metagenomics	61	Female	Germany	CRC	[30]
20074	PRJEB27928	ERR2726478	Metagenomics	61	Female	Germany	CRC	[30]
20075	PRJEB27928	ERR2726479	Metagenomics	61	Female	Germany	CRC	[30]
20076	PRJEB27928	ERR2726480	Metagenomics	63	Female	Germany	CRC	[30]
20077	PRJEB27928	ERR2726481	Metagenomics	63	Female	Germany	CRC	[30]
20078	PRJEB27928	ERR2726482	Metagenomics	63	Female	Germany	CRC	[30]
20079	PRJEB27928	ERR2726483	Metagenomics	63	Female	Germany	CRC	[30]
20080	PRJEB27928	ERR2726484	Metagenomics	50	Female	Germany	CRC	[30]
20081	PRJEB27928	ERR2726485	Metagenomics	64	Female	Germany	Healthy	[30]
20082	PRJEB27928	ERR2726486	Metagenomics	73	Male	Germany	Healthy	[30]
20083	PRJEB27928	ERR2726487	Metagenomics	64	Female	Germany	Healthy	[30]
20084	PRJEB27928	ERR2726488	Metagenomics	56	Female	Germany	CRC	[30]
20085	PRJEB27928	ERR2726489	Metagenomics	60	Female	Germany	CRC	[30]
20086	PRJEB27928	ERR2726490	Metagenomics	60	Female	Germany	CRC	[30]
20087	PRJEB27928	ERR2726491	Metagenomics	60	Female	Germany	CRC	[30]
20088	PRJEB27928	ERR2726492	Metagenomics	60	Female	Germany	CRC	[30]
10061	PRJNA447983	SRR6915169	Metagenomics	NA	NA	Italy	Healthy	[31]
10062	PRJNA447983	SRR6915170	Metagenomics	NA	NA	Italy	Healthy	[31]
10063	PRJNA447983	SRR6915171	Metagenomics	NA	NA	Italy	Healthy	[31]
10064	PRJNA447983	SRR6915172	Metagenomics	NA	NA	Italy	Healthy	[31]
10065	PRJNA447983	SRR6915173	Metagenomics	NA	NA	Italy	Healthy	[31]
10066	PRJNA447983	SRR6915174	Metagenomics	NA	NA	Italy	Healthy	[31]
10067	PRJNA447983	SRR6915175	Metagenomics	NA	NA	Italy	Healthy	[31]
10068	PRJNA447983	SRR6915176	Metagenomics	NA	NA	Italy	Healthy	[31]
10069	PRJNA447983	SRR6915177	Metagenomics	NA	NA	Italy	CRC	[31]
10070	PRJNA447983	SRR6915178	Metagenomics	NA	NA	Italy	CRC	[31]
10071	PRJNA447983	SRR6915179	Metagenomics	NA	NA	Italy	CRC	[31]
10072	PRJNA447983	SRR6915180	Metagenomics	NA	NA	Italy	CRC	[31]
10073	PRJNA447983	SRR6915181	Metagenomics	NA	NA	Italy	CRC	[31]
10074	PRJNA447983	SRR6915182	Metagenomics	NA	NA	Italy	CRC	[31]
10075	PRJNA447983	SRR6915183	Metagenomics	NA	NA	Italy	CRC	[31]
10076	PRJNA447983	SRR6915184	Metagenomics	NA	NA	Italy	CRC	[31]
10077	PRJNA447983	SRR6915185	Metagenomics	NA	NA	Italy	CRC	[31]
10078	PRJNA447983	SRR6915186	Metagenomics	NA	NA	Italy	Healthy	[31]
10079	PRJNA447983	SRR6915187	Metagenomics	64	Male	Italy	Healthy	[31]
10080	PRJNA447983	SRR6915188	Metagenomics	60	Male	Italy	CRC	[31]
10081	PRJNA447983	SRR6915189	Metagenomics	81	Female	Italy	Healthy	[31]
10082	PRJNA447983	SRR6915190	Metagenomics	78	Male	Italy	CRC	[31]
100182	PRJNA447983	SRR6915108	Metagenomics	NA	NA	Italy	Healthy	[31]
100183	PRJNA447983	SRR6915109	Metagenomics	NA	NA	Italy	CRC	[31]
100184	PRJNA447983	SRR6915110	Metagenomics	NA	NA	Italy	Healthy	[31]
100185	PRJNA447983	SRR6915111	Metagenomics	NA	NA	Italy	Healthy	[31]
100186	PRJNA447983	SRR6915112	Metagenomics	NA	NA	Italy	Healthy	[31]
100188	PRJNA447983	SRR6915114	Metagenomics	NA	NA	Italy	Healthy	[31]
100189	PRJNA447983	SRR6915115	Metagenomics	83	Female	Italy	CRC	[31]
100190	PRJNA447983	SRR6915116	Metagenomics	70	Female	Italy	Healthy	[31]
100191	PRJNA447983	SRR6915117	Metagenomics	NA	NA	Italy	Healthy	[31]
100192	PRJNA447983	SRR6915119	Metagenomics	66	Male	Italy	CRC	[31]
100193	PRJNA447983	SRR6915120	Metagenomics	64	Male	Italy	CRC	[31]
100194	PRJNA447983	SRR6915121	Metagenomics	66	Male	Italy	Healthy	[31]
100196	PRJNA447983	SRR6915123	Metagenomics	78	Male	Italy	CRC	[31]
100197	PRJNA447983	SRR6915125	Metagenomics	NA	NA	Italy	CRC	[31]
100198	PRJNA447983	SRR6915126	Metagenomics	NA	NA	Italy	Healthy	[31]
100199	PRJNA447983	SRR6915127	Metagenomics	NA	NA	Italy	CRC	[31]
100200	PRJNA447983	SRR6915128	Metagenomics	NA	NA	Italy	CRC	[31]
100203	PRJNA447983	SRR6915131	Metagenomics	NA	NA	Italy	Healthy	[31]
100204	PRJNA447983	SRR6915132	Metagenomics	NA	NA	Italy	CRC	[31]
100207	PRJNA447983	SRR6915135	Metagenomics	NA	NA	Italy	CRC	[31]
100208	PRJNA447983	SRR6915136	Metagenomics	NA	NA	Italy	CRC	[31]
100210	PRJNA447983	SRR6915144	Metagenomics	68	Female	Italy	Healthy	[31]
1001	PRJDB4176	DRR127478	Metagenomics	66	Female	Japan	CRC	[32]
1002	PRJDB4176	DRR127481	Metagenomics	61	Male	Japan	CRC	[32]
1003	PRJDB4176	DRR127485	Metagenomics	70	Female	Japan	CRC	[32]
1004	PRJDB4176	DRR127488	Metagenomics	72	Male	Japan	Healthy	[32]
1005	PRJDB4176	DRR127491	Metagenomics	62	Female	Japan	CRC	[32]
1006	PRJDB4176	DRR127507	Metagenomics	65	Male	Japan	CRC	[32]
1007	PRJDB4176	DRR127509	Metagenomics	59	Male	Japan	CRC	[32]
1008	PRJDB4176	DRR127514	Metagenomics	78	Male	Japan	CRC	[32]
1009	PRJDB4176	DRR127515	Metagenomics	30	Male	Japan	CRC	[32]
10010	PRJDB4176	DRR127517	Metagenomics	69	Female	Japan	CRC	[32]
10011	PRJDB4176	DRR127519	Metagenomics	57	Female	Japan	CRC	[32]
10012	PRJDB4176	DRR127521	Metagenomics	38	Male	Japan	CRC	[32]
10013	PRJDB4176	DRR127524	Metagenomics	73	Male	Japan	Healthy	[32]
10014	PRJDB4176	DRR127532	Metagenomics	59	Female	Japan	Healthy	[32]
10015	PRJDB4176	DRR127535	Metagenomics	64	Male	Japan	Healthy	[32]
10016	PRJDB4176	DRR127536	Metagenomics	44	Female	Japan	CRC	[32]
10017	PRJDB4176	DRR127537	Metagenomics	50	Female	Japan	Healthy	[32]
10018	PRJDB4176	DRR127546	Metagenomics	67	Female	Japan	Healthy	[32]
10019	PRJDB4176	DRR127552	Metagenomics	45	Male	Japan	Healthy	[32]
10020	PRJDB4176	DRR127557	Metagenomics	62	Male	Japan	CRC	[32]
10021	PRJDB4176	DRR127559	Metagenomics	46	Male	Japan	CRC	[32]
10022	PRJDB4176	DRR127567	Metagenomics	70	Female	Japan	CRC	[32]
10023	PRJDB4176	DRR127579	Metagenomics	70	Male	Japan	CRC	[32]
10024	PRJDB4176	DRR127580	Metagenomics	63	Female	Japan	CRC	[32]
10025	PRJDB4176	DRR127583	Metagenomics	65	Female	Japan	Healthy	[32]
10026	PRJDB4176	DRR127588	Metagenomics	76	Male	Japan	Healthy	[32]
10027	PRJDB4176	DRR127594	Metagenomics	69	Male	Japan	Healthy	[32]
10028	PRJDB4176	DRR127596	Metagenomics	76	Female	Japan	Healthy	[32]
10029	PRJDB4176	DRR127597	Metagenomics	53	Female	Japan	Healthy	[32]
10030	PRJDB4176	DRR127646	Metagenomics	49	Female	Japan	CRC	[32]
10031	PRJDB4176	DRR127647	Metagenomics	67	Female	Japan	CRC	[32]
10032	PRJDB4176	DRR127649	Metagenomics	49	Female	Japan	Healthy	[32]
10033	PRJDB4176	DRR127666	Metagenomics	78	Male	Japan	CRC	[32]
10034	PRJDB4176	DRR127669	Metagenomics	54	Female	Japan	CRC	[32]
10035	PRJDB4176	DRR127672	Metagenomics	42	Male	Japan	Healthy	[32]
10036	PRJDB4176	DRR127674	Metagenomics	59	Female	Japan	CRC	[32]
10037	PRJDB4176	DRR127683	Metagenomics	40	Male	Japan	Healthy	[32]
10038	PRJDB4176	DRR127685	Metagenomics	70	Male	Japan	CRC	[32]
10039	PRJDB4176	DRR127692	Metagenomics	76	Male	Japan	Healthy	[32]
10040	PRJDB4176	DRR127700	Metagenomics	46	Female	Japan	CRC	[32]
10041	PRJDB4176	DRR127704	Metagenomics	49	Female	Japan	Healthy	[32]
10042	PRJDB4176	DRR127707	Metagenomics	63	Male	Japan	Healthy	[32]
10043	PRJDB4176	DRR127708	Metagenomics	62	Male	Japan	CRC	[32]
10044	PRJDB4176	DRR127713	Metagenomics	49	Male	Japan	Healthy	[32]
10045	PRJDB4176	DRR127718	Metagenomics	75	Female	Japan	CRC	[32]
10046	PRJDB4176	DRR127720	Metagenomics	73	Female	Japan	CRC	[32]
10047	PRJDB4176	DRR127721	Metagenomics	51	Male	Japan	Healthy	[32]
10048	PRJDB4176	DRR127724	Metagenomics	66	Female	Japan	Healthy	[32]
10049	PRJDB4176	DRR127728	Metagenomics	71	Female	Japan	Healthy	[32]
10050	PRJDB4176	DRR127731	Metagenomics	66	Male	Japan	Healthy	[32]
10052	PRJDB4176	DRR127737	Metagenomics	77	Female	Japan	Healthy	[32]
10053	PRJDB4176	DRR127748	Metagenomics	44	Male	Japan	Healthy	[32]
10054	PRJDB4176	DRR127751	Metagenomics	74	Male	Japan	Healthy	[32]
10055	PRJDB4176	DRR127752	Metagenomics	70	Male	Japan	Healthy	[32]
10056	PRJDB4176	DRR127754	Metagenomics	55	Male	Japan	CRC	[32]
10057	PRJDB4176	DRR127755	Metagenomics	70	Male	Japan	Healthy	[32]
10058	PRJDB4176	DRR127756	Metagenomics	75	Male	Japan	Healthy	[32]
10059	PRJDB4176	DRR127762	Metagenomics	76	Male	Japan	Healthy	[32]
10060	PRJDB4176	DRR127763	Metagenomics	76	Male	Japan	Healthy	[32]
10091	PRJDB4176	DRR127767	Metagenomics	28	Male	Japan	CRC	[32]
10092	PRJDB4176	DRR127774	Metagenomics	69	Female	Japan	CRC	[32]
10093	PRJDB4176	DRR127776	Metagenomics	73	Female	Japan	Healthy	[32]
10094	PRJDB4176	DRR127777	Metagenomics	77	Female	Japan	Healthy	[32]
10095	PRJDB4176	DRR127789	Metagenomics	51	Male	Japan	CRC	[32]
10096	PRJDB4176	DRR162775	Metagenomics	65	Male	Japan	Healthy	[32]
10097	PRJDB4176	DRR162776	Metagenomics	66	Female	Japan	Healthy	[32]
10098	PRJDB4176	DRR162777	Metagenomics	48	Male	Japan	CRC	[32]
10099	PRJDB4176	DRR162778	Metagenomics	65	Male	Japan	CRC	[32]
2001	PRJEB10878	ERR1018278	Metagenomics	58	Male	China	Healthy	[33]
2002	PRJEB10878	ERR1018279	Metagenomics	60	Male	China	CRC	[33]
2003	PRJEB10878	ERR1018280	Metagenomics	77	Male	China	CRC	[33]
2004	PRJEB10878	ERR1018281	Metagenomics	59	Female	China	CRC	[33]
2005	PRJEB10878	ERR1018282	Metagenomics	71	Female	China	CRC	[33]
2006	PRJEB10878	ERR1018283	Metagenomics	56	Male	China	CRC	[33]
2007	PRJEB10878	ERR1018284	Metagenomics	77	Male	China	CRC	[33]
10083	PRJEB10878	ERR1018185	Metagenomics	64	Male	China	CRC	[33]
10084	PRJEB10878	ERR1018186	Metagenomics	73	Male	China	CRC	[33]
10086	PRJEB10878	ERR1018188	Metagenomics	56	Male	China	CRC	[33]
10087	PRJEB10878	ERR1018189	Metagenomics	59	Female	China	CRC	[33]
10088	PRJEB10878	ERR1018190	Metagenomics	61	Male	China	CRC	[33]
10089	PRJEB10878	ERR1018191	Metagenomics	60	Male	China	CRC	[33]
10090	PRJEB10878	ERR1018192	Metagenomics	73	Female	China	CRC	[33]
100121	PRJEB10878	ERR1018193	Metagenomics	62	Male	China	Healthy	[33]
100122	PRJEB10878	ERR1018194	Metagenomics	72	Female	China	CRC	[33]
100123	PRJEB10878	ERR1018195	Metagenomics	65	Male	China	Healthy	[33]
100124	PRJEB10878	ERR1018196	Metagenomics	65	Male	China	CRC	[33]
100125	PRJEB10878	ERR1018197	Metagenomics	71	Male	China	CRC	[33]
100126	PRJEB10878	ERR1018198	Metagenomics	50	Male	China	CRC	[33]
100127	PRJEB10878	ERR1018199	Metagenomics	55	Male	China	CRC	[33]
100128	PRJEB10878	ERR1018200	Metagenomics	77	Male	China	CRC	[33]
100129	PRJEB10878	ERR1018201	Metagenomics	45	Female	China	CRC	[33]
100130	PRJEB10878	ERR1018202	Metagenomics	89	Female	China	CRC	[33]
100131	PRJEB10878	ERR1018203	Metagenomics	58	Female	China	Healthy	[33]
100132	PRJEB10878	ERR1018204	Metagenomics	58	Female	China	CRC	[33]
100133	PRJEB10878	ERR1018205	Metagenomics	68	Male	China	Healthy	[33]
100134	PRJEB10878	ERR1018206	Metagenomics	64	Female	China	CRC	[33]
100135	PRJEB10878	ERR1018207	Metagenomics	75	Female	China	CRC	[33]
100136	PRJEB10878	ERR1018208	Metagenomics	73	Male	China	CRC	[33]
100137	PRJEB10878	ERR1018209	Metagenomics	62	Female	China	Healthy	[33]
100138	PRJEB10878	ERR1018210	Metagenomics	80	Male	China	CRC	[33]
100139	PRJEB10878	ERR1018211	Metagenomics	67	Male	China	CRC	[33]
100140	PRJEB10878	ERR1018212	Metagenomics	61	Female	China	CRC	[33]
100141	PRJEB10878	ERR1018213	Metagenomics	63	Male	China	CRC	[33]
100142	PRJEB10878	ERR1018214	Metagenomics	51	Female	China	CRC	[33]
100143	PRJEB10878	ERR1018215	Metagenomics	64	Male	China	CRC	[33]
100144	PRJEB10878	ERR1018216	Metagenomics	74	Female	China	CRC	[33]
100145	PRJEB10878	ERR1018217	Metagenomics	68	Male	China	Healthy	[33]
100146	PRJEB10878	ERR1018218	Metagenomics	83	Female	China	CRC	[33]
100147	PRJEB10878	ERR1018219	Metagenomics	70	Male	China	CRC	[33]
100148	PRJEB10878	ERR1018220	Metagenomics	56	Male	China	CRC	[33]
100149	PRJEB10878	ERR1018221	Metagenomics	54	Male	China	CRC	[33]
100150	PRJEB10878	ERR1018222	Metagenomics	74	Male	China	CRC	[33]
100211	PRJEB10878	ERR1018223	Metagenomics	57	Male	China	CRC	[33]
100212	PRJEB10878	ERR1018224	Metagenomics	54	Female	China	CRC	[33]
100213	PRJEB10878	ERR1018225	Metagenomics	62	Male	China	CRC	[33]
100214	PRJEB10878	ERR1018226	Metagenomics	54	Female	China	CRC	[33]
100215	PRJEB10878	ERR1018227	Metagenomics	69	Male	China	CRC	[33]
100216	PRJEB10878	ERR1018228	Metagenomics	64	Male	China	CRC	[33]
100217	PRJEB10878	ERR1018229	Metagenomics	44	Male	China	CRC	[33]
100218	PRJEB10878	ERR1018230	Metagenomics	60	Male	China	CRC	[33]
100220	PRJEB10878	ERR1018232	Metagenomics	62	Female	China	Healthy	[33]
100221	PRJEB10878	ERR1018233	Metagenomics	58	Male	China	Healthy	[33]
100222	PRJEB10878	ERR1018234	Metagenomics	64	Male	China	Healthy	[33]
100223	PRJEB10878	ERR1018235	Metagenomics	65	Female	China	Healthy	[33]
100224	PRJEB10878	ERR1018236	Metagenomics	62	Male	China	Healthy	[33]
100225	PRJEB10878	ERR1018237	Metagenomics	69	Female	China	Healthy	[33]
100226	PRJEB10878	ERR1018238	Metagenomics	55	Male	China	Healthy	[33]
100227	PRJEB10878	ERR1018239	Metagenomics	64	Female	China	Healthy	[33]
100228	PRJEB10878	ERR1018240	Metagenomics	59	Male	China	Healthy	[33]
100229	PRJEB10878	ERR1018241	Metagenomics	70	Male	China	CRC	[33]
100230	PRJEB10878	ERR1018242	Metagenomics	71	Female	China	Healthy	[33]
100231	PRJEB10878	ERR1018246	Metagenomics	50	Male	China	Healthy	[33]
100232	PRJEB10878	ERR1018247	Metagenomics	66	Female	China	Healthy	[33]
100233	PRJEB10878	ERR1018248	Metagenomics	52	Male	China	Healthy	[33]
100234	PRJEB10878	ERR1018249	Metagenomics	64	Male	China	Healthy	[33]
100235	PRJEB10878	ERR1018250	Metagenomics	58	Male	China	Healthy	[33]
100236	PRJEB10878	ERR1018251	Metagenomics	64	Female	China	Healthy	[33]
100237	PRJEB10878	ERR1018252	Metagenomics	65	Male	China	Healthy	[33]
100238	PRJEB10878	ERR1018253	Metagenomics	53	Male	China	Healthy	[33]
100239	PRJEB10878	ERR1018254	Metagenomics	64	Female	China	Healthy	[33]
100241	PRJEB10878	ERR1018256	Metagenomics	53	Male	China	Healthy	[33]
100242	PRJEB10878	ERR1018257	Metagenomics	64	Female	China	Healthy	[33]
100243	PRJEB10878	ERR1018258	Metagenomics	61	Male	China	Healthy	[33]
100244	PRJEB10878	ERR1018259	Metagenomics	62	Female	China	Healthy	[33]
100245	PRJEB10878	ERR1018260	Metagenomics	64	Male	China	Healthy	[33]
100246	PRJEB10878	ERR1018261	Metagenomics	55	Male	China	Healthy	[33]
100247	PRJEB10878	ERR1018262	Metagenomics	64	Female	China	Healthy	[33]
100248	PRJEB10878	ERR1018263	Metagenomics	71	Female	China	Healthy	[33]
100249	PRJEB10878	ERR1018264	Metagenomics	64	Female	China	Healthy	[33]
100250	PRJEB10878	ERR1018265	Metagenomics	65	Male	China	Healthy	[33]
100251	PRJEB10878	ERR1018266	Metagenomics	73	Female	China	Healthy	[33]
100252	PRJEB10878	ERR1018267	Metagenomics	54	Male	China	Healthy	[33]
100253	PRJEB10878	ERR1018268	Metagenomics	65	Female	China	Healthy	[33]
100254	PRJEB10878	ERR1018269	Metagenomics	60	Male	China	Healthy	[33]
100255	PRJEB10878	ERR1018270	Metagenomics	58	Male	China	Healthy	[33]
100256	PRJEB10878	ERR1018271	Metagenomics	64	Female	China	Healthy	[33]
100257	PRJEB10878	ERR1018272	Metagenomics	69	Male	China	Healthy	[33]
100258	PRJEB10878	ERR1018273	Metagenomics	65	Female	China	Healthy	[33]
100259	PRJEB10878	ERR1018274	Metagenomics	59	Male	China	Healthy	[33]
100260	PRJEB10878	ERR1018275	Metagenomics	70	Female	China	Healthy	[33]
100261	PRJEB10878	ERR1018276	Metagenomics	61	Male	China	Healthy	[33]
100262	PRJEB10878	ERR1018277	Metagenomics	52	Male	China	Healthy	[33]
200183	PRJNA397112	SRR8865580	Metagenomics	67	Male	India	CRC	[34]
200184	PRJNA397112	SRR5898982	Metagenomics	50	Female	India	Healthy	[34]
200185	PRJNA397112	SRR5898985	Metagenomics	57	Male	India	Healthy	[34]
200186	PRJNA397112	SRR8865577	Metagenomics	71	Male	India	CRC	[34]
200187	PRJNA397112	SRR8865593	Metagenomics	72	Male	India	CRC	[34]
200188	PRJNA397112	SRR8865575	Metagenomics	60	Male	India	CRC	[34]
200189	PRJNA397112	SRR8865594	Metagenomics	48	Male	India	CRC	[34]
200190	PRJNA397112	SRR8865573	Metagenomics	66	Female	India	CRC	[34]
200191	PRJNA397112	SRR8865579	Metagenomics	54	Male	India	CRC	[34]
200192	PRJNA397112	SRR8865586	Metagenomics	59	Male	India	CRC	[34]
200193	PRJNA397112	SRR8865597	Metagenomics	55	Male	India	CRC	[34]
200194	PRJNA397112	SRR8865600	Metagenomics	41	s	India	CRC	[34]
200195	PRJNA397112	SRR5898987	Metagenomics	71	Male	India	Healthy	[34]
200196	PRJNA397112	SRR5898983	Metagenomics	58	Male	India	Healthy	[34]
200197	PRJNA397112	SRR5898921	Metagenomics	23	Female	India	Healthy	[34]
200198	PRJNA397112	SRR8865591	Metagenomics	61	Male	India	CRC	[34]
200199	PRJNA397112	SRR5898978	Metagenomics	61	Male	India	Healthy	[34]
200200	PRJNA397112	SRR8865574	Metagenomics	58	Male	India	CRC	[34]
200201	PRJNA397112	SRR5898979	Metagenomics	58	Female	India	Healthy	[34]
200202	PRJNA397112	SRR8865578	Metagenomics	62	Female	India	CRC	[34]
200203	PRJNA397112	SRR8865581	Metagenomics	71	Male	India	CRC	[34]
200204	PRJNA397112	SRR8865598	Metagenomics	62	Male	India	CRC	[34]
200205	PRJNA397112	SRR8865583	Metagenomics	64	Male	India	CRC	[34]
200206	PRJNA397112	SRR8865601	Metagenomics	65	Male	India	CRC	[34]
200207	PRJNA397112	SRR8865572	Metagenomics	59	Female	India	CRC	[34]
200208	PRJNA397112	SRR8865595	Metagenomics	56	Male	India	CRC	[34]
200209	PRJNA397112	SRR8865587	Metagenomics	66	Female	India	CRC	[34]
200210	PRJNA397112	SRR5898981	Metagenomics	62	Male	India	Healthy	[34]
200211	PRJNA397112	SRR5898923	Metagenomics	26	Female	India	Healthy	[34]
200212	PRJNA397112	SRR5898925	Metagenomics	26	Female	India	Healthy	[34]
200213	PRJNA397112	SRR8865592	Metagenomics	49	Male	India	CRC	[34]
200214	PRJNA397112	SRR5898986	Metagenomics	57	Female	India	Healthy	[34]
200215	PRJNA397112	SRR8865599	Metagenomics	65	Female	India	CRC	[34]
200216	PRJNA397112	SRR8865584	Metagenomics	75	Female	India	CRC	[34]
200217	PRJNA397112	SRR5898911	Metagenomics	25	Female	India	Healthy	[34]
200218	PRJNA397112	SRR8865596	Metagenomics	59	Male	India	CRC	[34]
200219	PRJNA397112	SRR8865576	Metagenomics	58	Female	India	CRC	[34]
200220	PRJNA397112	SRR8865582	Metagenomics	57	Male	India	CRC	[34]
200221	PRJNA397112	SRR5898924	Metagenomics	25	Male	India	Healthy	[34]
200222	PRJNA397112	SRR5898908	Metagenomics	29	Female	India	Healthy	[34]
200223	PRJNA397112	SRR5898922	Metagenomics	26	Female	India	Healthy	[34]
200224	PRJNA397112	SRR8865588	Metagenomics	56	Female	India	CRC	[34]
200225	PRJNA397112	SRR5898912	Metagenomics	23	Female	India	Healthy	[34]
200227	PRJNA397112	SRR5898984	Metagenomics	62	Female	India	Healthy	[34]
200228	PRJNA397112	SRR8865590	Metagenomics	53	Female	India	CRC	[34]
200229	PRJNA397112	SRR5898980	Metagenomics	52	Female	India	Healthy	[34]
200230	PRJNA397112	SRR5898909	Metagenomics	22	Female	India	Healthy	[34]
200231	PRJNA397112	SRR5898920	Metagenomics	24	Female	India	Healthy	[34]
200232	PRJNA397112	SRR5898926	Metagenomics	26	Male	India	Healthy	[34]
200233	PRJNA397112	SRR8865589	Metagenomics	47	Female	India	CRC	[34]
200234	PRJNA397112	SRR5899007	Metagenomics	26	Male	India	Healthy	[34]
200235	PRJNA397112	SRR5899006	Metagenomics	25	Male	India	Healthy	[34]
200236	PRJNA397112	SRR5899005	Metagenomics	30	Male	India	Healthy	[34]
200237	PRJNA397112	SRR5898950	Metagenomics	50	Female	India	Healthy	[34]
200238	PRJNA397112	SRR5898948	Metagenomics	58	Female	India	Healthy	[34]
200239	PRJNA397112	SRR5898910	Metagenomics	24	Male	India	Healthy	[34]
200240	PRJNA397112	SRR5898954	Metagenomics	53	Female	India	Healthy	[34]
200241	PRJNA397112	SRR5899017	Metagenomics	50	Female	India	Healthy	[34]
200242	PRJNA397112	SRR5898966	Metagenomics	64	Female	India	Healthy	[34]
