# Supplementary material for: The Archaeome's Role in Colorectal Cancer: Unveiling the DPANN Group and Investigating Archaeal Functional Signatures
Source: Preprints.org preprint supplement (doi:10.20944/preprints202308.1572.v1), 2023-08-22
Supplement: Supplementary file 2 [file Supplementary data S2 (Kraken abundance table).xlsx]

## Sheet: Kraken abundance tab.phyla
#ID	Project n°	run accession	Euryarchaeota	Thermoproteota	Candidatus Korarchaeota	Nitrososphaerota	Candidatus Geothermarchaeota	Candidatus Micrarchaeota	Candidatus Lokiarchaeota
1001	PRJDB4176	DRR127478	57877	15538	2	2570	167	8	33
1002	PRJDB4176	DRR127481	47478	27905	44	271	66	243	60
1003	PRJDB4176	DRR127485	153371	29505	41	667	322	26	59
1004	PRJDB4176	DRR127488	76568	45066	27	986	413	46	122
1005	PRJDB4176	DRR127491	18595	8679	9	253	180	1	44
1006	PRJDB4176	DRR127507	48347	10146	62	1134	63	98	345
1007	PRJDB4176	DRR127509	55706	17104	62	572	103	60	35
1008	PRJDB4176	DRR127514	33891	2834	1	295	6	40	116
1009	PRJDB4176	DRR127515	358309	27850	25	1442	531	120	134
10010	PRJDB4176	DRR127517	54921	28794	44	967	186	39	117
10011	PRJDB4176	DRR127519	64279	20369	0	332	21	69	78
10012	PRJDB4176	DRR127521	79345	14086	44	1429	336	148	31
10013	PRJDB4176	DRR127524	94733	29983	26	709	330	58	216
10014	PRJDB4176	DRR127532	71007	5707	6	945	15	120	96
10015	PRJDB4176	DRR127535	28782	14263	10	263	6	27	53
10016	PRJDB4176	DRR127536	46065	23269	40	841	141	125	73
10017	PRJDB4176	DRR127537	77207	18178	0	355	49	2	534
10018	PRJDB4176	DRR127546	103226	40292	57	1172	371	465	328
10019	PRJDB4176	DRR127552	30398	9541	5	283	1	54	294
10020	PRJDB4176	DRR127557	50656	7488	15	203	241	1	167
10021	PRJDB4176	DRR127559	54152	6954	106	429	320	14	136
10022	PRJDB4176	DRR127567	154395	3454	0	802	4	10	68
10023	PRJDB4176	DRR127579	49054	7307	10	339	1	395	557
10024	PRJDB4176	DRR127580	61832	7340	41	639	235	54	73
10025	PRJDB4176	DRR127583	70846	5948	16	404	99	2	175
10026	PRJDB4176	DRR127588	44824	4797	5	424	437	50	23
10027	PRJDB4176	DRR127594	62177	7106	52	540	235	79	26
10028	PRJDB4176	DRR127596	95822	5941	0	1063	303	17	1566
10029	PRJDB4176	DRR127597	58680	5608	23	400	204	69	297
10030	PRJDB4176	DRR127646	87916	7455	71	615	254	28	121
10031	PRJDB4176	DRR127647	62534	9274	0	378	1	0	308
10032	PRJDB4176	DRR127649	57791	6023	48	559	179	91	62
10033	PRJDB4176	DRR127666	61411	8299	4	245	40	64	579
10034	PRJDB4176	DRR127669	35115	3000	15	227	182	49	46
10035	PRJDB4176	DRR127672	45871	6265	3	277	10	64	274
10036	PRJDB4176	DRR127674	59901	6742	7	435	27	0	533
10037	PRJDB4176	DRR127683	45975	7449	9	106	9	26	242
10038	PRJDB4176	DRR127685	107674	5989	14	1147	209	16	203
10039	PRJDB4176	DRR127692	52482	4612	7	314	173	14	197
10040	PRJDB4176	DRR127700	52230	3840	93	717	119	107	70
10041	PRJDB4176	DRR127704	47167	5581	67	379	262	35	88
10042	PRJDB4176	DRR127707	84573	8261	13	824	465	0	69
10043	PRJDB4176	DRR127708	55090	4256	17	247	22	315	72
10044	PRJDB4176	DRR127713	49852	6912	5	394	3	2	54
10045	PRJDB4176	DRR127718	73213	5198	15	142	3	50	172
10046	PRJDB4176	DRR127720	69512	7218	125	621	82	672	79
10047	PRJDB4176	DRR127721	90043	8261	1	596	14	89	1712
10048	PRJDB4176	DRR127724	46477	21186	18	469	146	0	229
10049	PRJDB4176	DRR127728	35262	35797	0	203	4	10	27
10050	PRJDB4176	DRR127731	74463	31830	125	1014	9	192	579
10052	PRJDB4176	DRR127737	69537	30026	9	435	101	203	522
10053	PRJDB4176	DRR127748	51612	12511	1	218	1	85	114
10054	PRJDB4176	DRR127751	114635	23506	0	956	3	2	310
10055	PRJDB4176	DRR127752	65437	13023	1	823	13	82	492
10056	PRJDB4176	DRR127754	58010	16988	3	373	38	24	235
10057	PRJDB4176	DRR127755	69365	16434	0	954	279	54	191
10058	PRJDB4176	DRR127756	78415	20573	15	788	4	58	504
10059	PRJDB4176	DRR127762	56349	23556	18	740	192	88	98
10060	PRJDB4176	DRR127763	52540	19276	40	527	419	74	56
10091	PRJDB4176	DRR127767	71282	16203	105	523	232	133	20
10092	PRJDB4176	DRR127774	46739	15404	23	512	170	38	41
10093	PRJDB4176	DRR127776	67113	31687	2	682	1	87	137
10094	PRJDB4176	DRR127777	76571	20992	8	1005	125	48	68
10095	PRJDB4176	DRR127789	151768	10746	28	584	152	41	74
10096	PRJDB4176	DRR162775	100147	11257	46	231	0	192	2433
10097	PRJDB4176	DRR162776	29283	4634	2	103	21	4	211
10098	PRJDB4176	DRR162777	53223	6202	2	676	1	57	120
10099	PRJDB4176	DRR162778	121286	8573	120	1152	269	140	350
10083	PRJEB10878	ERR1018185	86703	1489	39	1043	69	529	168
10084	PRJEB10878	ERR1018186	45255	1028	29	603	31	137	32
10086	PRJEB10878	ERR1018188	58702	1414	38	652	72	129	141
10087	PRJEB10878	ERR1018189	48831	1582	16	1428	32	187	129
10088	PRJEB10878	ERR1018190	32472	2356	14	248	34	27	6
10089	PRJEB10878	ERR1018191	67290	2071	13	517	15	8	18
10090	PRJEB10878	ERR1018192	58861	3577	2	309	7	69	1764
100121	PRJEB10878	ERR1018193	87479	2578	7	522	98	1	211
100122	PRJEB10878	ERR1018194	89015	1806	8	623	15	22	273
100123	PRJEB10878	ERR1018195	42270	3805	14	319	6	1	153
100124	PRJEB10878	ERR1018196	399015	2991	67	548	51	1	98
100125	PRJEB10878	ERR1018197	60643	3051	25	693	77	1	94
100126	PRJEB10878	ERR1018198	63468	1633	129	815	57	1	308
100127	PRJEB10878	ERR1018199	22786	1174	3	589	1	23	389
100128	PRJEB10878	ERR1018200	60721	1961	11	460	86	770	30
100129	PRJEB10878	ERR1018201	41043	1190	26	419	104	27	103
100130	PRJEB10878	ERR1018202	56951	1640	7	788	11	7	29
100131	PRJEB10878	ERR1018203	51953	3610	1	679	42	103	363
100132	PRJEB10878	ERR1018204	33953	1522	20	249	4	2130	322
100133	PRJEB10878	ERR1018205	43165	3375	17	578	3	0	523
100134	PRJEB10878	ERR1018206	40883	2319	0	277	13	5	603
100135	PRJEB10878	ERR1018207	45563	2315	30	300	13	50	555
100136	PRJEB10878	ERR1018208	128221	265	1	189	21	0	4
100137	PRJEB10878	ERR1018209	26078	1193	5	221	22	4	95
100138	PRJEB10878	ERR1018210	40671	3401	2	318	19	112	66
100139	PRJEB10878	ERR1018211	69461	1908	192	1027	62	15	92
100140	PRJEB10878	ERR1018212	63228	3268	53	533	8	26	307
100141	PRJEB10878	ERR1018213	74802	2040	16	1763	475	3	130
100142	PRJEB10878	ERR1018214	41784	3220	6	149	40	3	514
100143	PRJEB10878	ERR1018215	84140	2759	74	1775	116	1	80
100144	PRJEB10878	ERR1018216	54033	2052	18	585	4	3	637
100145	PRJEB10878	ERR1018217	77431	1487	204	969	70	3	294
100146	PRJEB10878	ERR1018218	52726	2237	32	464	259	18	332
100147	PRJEB10878	ERR1018219	64144	4701	1	976	23	104	481
100148	PRJEB10878	ERR1018220	75787	2548	46	881	98	5	914
100149	PRJEB10878	ERR1018221	58320	2015	65	662	36	143	115
100150	PRJEB10878	ERR1018222	285861	1875	78	498	79	484	88
100211	PRJEB10878	ERR1018223	54659	1459	17	969	19	16	88
100212	PRJEB10878	ERR1018224	66712	508	136	1139	116	1	31
100213	PRJEB10878	ERR1018225	57432	3463	14	399	5	26	209
100214	PRJEB10878	ERR1018226	62316	1862	8	909	17	5	204
100215	PRJEB10878	ERR1018227	75810	2301	32	603	137	2	1788
100216	PRJEB10878	ERR1018228	190528	2474	25	837	32	4	676
100217	PRJEB10878	ERR1018229	103019	1690	128	1791	39	47	366
100218	PRJEB10878	ERR1018230	67715	2062	183	675	43	491	48
100220	PRJEB10878	ERR1018232	85828	1369	64	1260	327	16	117
100221	PRJEB10878	ERR1018233	64624	4383	1	889	6	27	468
100222	PRJEB10878	ERR1018234	195255	612	0	863	1	1	84
100223	PRJEB10878	ERR1018235	132073	2117	26	1655	285	21	57
100224	PRJEB10878	ERR1018236	51605	4531	20	530	24	112	35
100225	PRJEB10878	ERR1018237	68807	3318	0	1062	3	0	17
100226	PRJEB10878	ERR1018238	113546	2303	49	1724	1	21	12
100227	PRJEB10878	ERR1018239	73008	2336	31	499	33	114	38
100228	PRJEB10878	ERR1018240	92478	3585	20	740	120	4	303
100229	PRJEB10878	ERR1018241	45646	3456	29	283	7	1	224
100230	PRJEB10878	ERR1018242	98409	1043	1	1257	73	15	159
100231	PRJEB10878	ERR1018246	71102	2039	40	826	262	27	228
100232	PRJEB10878	ERR1018247	87054	1145	27	455	92	2	157
100233	PRJEB10878	ERR1018248	60384	986	16	1034	39	12	156
100234	PRJEB10878	ERR1018249	31115	1625	19	659	27	56	108
100235	PRJEB10878	ERR1018250	78077	665	78	1408	19	11	42
100236	PRJEB10878	ERR1018251	50666	2012	14	356	50	16	86
100237	PRJEB10878	ERR1018252	59065	1004	25	766	190	37	372
100238	PRJEB10878	ERR1018253	51301	1915	69	620	20	0	197
100239	PRJEB10878	ERR1018254	74414	2765	103	873	107	9	60
100241	PRJEB10878	ERR1018256	87508	2253	20	883	36	40	377
100242	PRJEB10878	ERR1018257	68925	1026	40	786	149	11	63
100243	PRJEB10878	ERR1018258	39605	2713	14	485	73	0	285
100244	PRJEB10878	ERR1018259	58541	1288	8	845	140	15	63
100245	PRJEB10878	ERR1018260	39749	2849	10	240	23	20	343
100246	PRJEB10878	ERR1018261	52739	1028	62	1187	5	2	66
100247	PRJEB10878	ERR1018262	74847	2161	16	1189	72	10	276
100248	PRJEB10878	ERR1018263	63427	1576	1	962	50	10	381
100249	PRJEB10878	ERR1018264	98865	1301	9	585	145	3	50
100250	PRJEB10878	ERR1018265	50587	3459	26	479	41	52	114
100251	PRJEB10878	ERR1018266	54303	2387	74	869	77	5	115
100252	PRJEB10878	ERR1018267	41387	1950	39	652	23	32	154
100253	PRJEB10878	ERR1018268	114837	2211	85	819	166	1	182
100254	PRJEB10878	ERR1018269	46893	2064	22	509	57	0	49
100255	PRJEB10878	ERR1018270	58610	3033	20	1024	113	1	182
100256	PRJEB10878	ERR1018271	102651	405	19	679	34	40	70
100257	PRJEB10878	ERR1018272	176423	2019	61	838	123	16	110
100258	PRJEB10878	ERR1018273	53123	1197	72	733	16	18	14
100259	PRJEB10878	ERR1018274	49927	2071	10	972	168	52	151
100260	PRJEB10878	ERR1018275	37537	779	22	412	21	5	63
100261	PRJEB10878	ERR1018276	37005	2077	27	630	186	13	133
100262	PRJEB10878	ERR1018277	80143	1755	13	1837	64	20	1389
2001	PRJEB10878	ERR1018278	57440	1028	20	517	471	71	111
2002	PRJEB10878	ERR1018279	70073	1902	0	543	0	2	130
2003	PRJEB10878	ERR1018280	75438	1725	8	1398	23	30	34
2004	PRJEB10878	ERR1018281	49897	1695	64	716	35	175	83
2005	PRJEB10878	ERR1018282	72944	1325	57	878	51	42	38
2006	PRJEB10878	ERR1018283	64060	2845	1	381	61	36	1141
2007	PRJEB10878	ERR1018284	47008	837	7	508	27	2	33
2008	PRJEB27928	ERR2726404	80761	2511	136	899	941	37	5
2009	PRJEB27928	ERR2726405	99959	1307	33	1208	314	43	37
20010	PRJEB27928	ERR2726406	72185	1544	44	774	151	17	41
20011	PRJEB27928	ERR2726407	75923	1849	14	892	919	5	142
20012	PRJEB27928	ERR2726408	100767	1165	44	902	233	81	64
20013	PRJEB27928	ERR2726409	40599	1230	38	629	393	18	137
20014	PRJEB27928	ERR2726410	30738	1274	12	276	10	7	8
20015	PRJEB27928	ERR2726411	39254	1104	3	272	19	66	30
20016	PRJEB27928	ERR2726412	30772	1017	0	259	14	55	40
20017	PRJEB27928	ERR2726413	30575	1023	0	255	22	76	26
20018	PRJEB27928	ERR2726414	26366	993	3	247	17	83	40
20019	PRJEB27928	ERR2726415	66972	516	30	146	24	19	32
20020	PRJEB27928	ERR2726416	61661	503	25	124	24	18	28
20021	PRJEB27928	ERR2726417	62674	519	23	125	28	17	35
20022	PRJEB27928	ERR2726418	59628	530	24	142	26	9	31
20023	PRJEB27928	ERR2726419	109831	1250	241	908	156	62	4
20024	PRJEB27928	ERR2726420	46501	934	29	441	114	55	73
20025	PRJEB27928	ERR2726421	58655	859	38	604	389	25	129
20026	PRJEB27928	ERR2726422	43620	1888	43	318	344	35	49
20027	PRJEB27928	ERR2726423	60020	845	23	435	46	16	36
20028	PRJEB27928	ERR2726424	57617	830	27	387	57	11	40
20029	PRJEB27928	ERR2726425	57284	793	28	361	59	19	36
20030	PRJEB27928	ERR2726426	55521	773	21	388	44	18	38
20031	PRJEB27928	ERR2726427	76694	1415	231	1002	69	91	180
20032	PRJEB27928	ERR2726428	21772	1116	30	238	47	0	5
20033	PRJEB27928	ERR2726429	96530	1281	81	431	70	20	160
20034	PRJEB27928	ERR2726430	50599	3362	16	421	72	7	19
20035	PRJEB27928	ERR2726431	133570	889	70	497	30	10	50
20036	PRJEB27928	ERR2726432	55287	1810	57	791	131	3	168
20037	PRJEB27928	ERR2726433	95807	1936	40	538	46	40	59
20038	PRJEB27928	ERR2726434	49720	1229	24	646	192	2	17
20039	PRJEB27928	ERR2726435	77556	2169	58	1352	155	30	71
20040	PRJEB27928	ERR2726436	90512	1971	75	1592	490	76	31
20041	PRJEB27928	ERR2726437	59060	499	63	322	43	111	10
20042	PRJEB27928	ERR2726438	57056	512	61	294	31	142	13
20043	PRJEB27928	ERR2726439	56551	521	49	296	42	112	13
20044	PRJEB27928	ERR2726440	54702	452	47	283	39	117	23
20045	PRJEB27928	ERR2726441	57652	2176	40	648	316	43	56
20046	PRJEB27928	ERR2726442	70089	2466	78	1139	251	21	69
20047	PRJEB27928	ERR2726443	36475	850	29	303	169	8	27
20048	PRJEB27928	ERR2726444	70002	1922	31	1027	518	15	79
20049	PRJEB27928	ERR2726453	21277	1381	5	287	47	6	52
20050	PRJEB27928	ERR2726454	19821	1323	13	287	54	6	66
20051	PRJEB27928	ERR2726455	19678	1302	8	262	39	11	56
20052	PRJEB27928	ERR2726456	18824	1245	6	232	48	7	52
20053	PRJEB27928	ERR2726457	39162	1724	17	558	711	59	36
20054	PRJEB27928	ERR2726458	67208	3115	47	737	55	45	1
20055	PRJEB27928	ERR2726459	87712	1353	116	646	242	11	41
20056	PRJEB27928	ERR2726460	52801	471	79	554	52	6	12
20057	PRJEB27928	ERR2726461	84048	2418	73	1205	821	0	11
20058	PRJEB27928	ERR2726462	56856	2416	65	613	209	33	63
20059	PRJEB27928	ERR2726463	25988	727	6	210	51	10	11
20060	PRJEB27928	ERR2726464	21789	688	8	195	68	5	10
20061	PRJEB27928	ERR2726465	21853	677	7	189	73	10	10
20062	PRJEB27928	ERR2726466	19428	710	6	187	46	17	17
20063	PRJEB27928	ERR2726467	34849	656	33	364	130	6	29
20064	PRJEB27928	ERR2726468	33953	648	25	350	87	5	27
20065	PRJEB27928	ERR2726469	33319	644	40	416	90	6	24
20066	PRJEB27928	ERR2726470	32436	631	33	338	98	8	17
20067	PRJEB27928	ERR2726471	68035	2178	24	922	314	50	29
20068	PRJEB27928	ERR2726472	41981	1551	12	791	74	45	52
20069	PRJEB27928	ERR2726473	34443	919	28	502	66	27	48
20070	PRJEB27928	ERR2726474	61492	1581	85	642	169	36	18
20071	PRJEB27928	ERR2726475	57942	3074	23	457	209	94	2
20072	PRJEB27928	ERR2726476	31862	1196	11	474	422	1	19
20073	PRJEB27928	ERR2726477	30138	1113	18	441	364	3	30
20074	PRJEB27928	ERR2726478	29953	1127	16	486	397	2	31
20075	PRJEB27928	ERR2726479	28350	1006	11	433	307	7	22
20076	PRJEB27928	ERR2726480	28007	686	45	307	39	103	30
20077	PRJEB27928	ERR2726481	27176	666	50	307	38	106	30
20078	PRJEB27928	ERR2726482	26803	624	44	346	34	86	34
20079	PRJEB27928	ERR2726483	26061	629	40	271	40	89	28
20080	PRJEB27928	ERR2726484	36214	1196	56	1014	96	1	5
20081	PRJEB27928	ERR2726485	62026	1224	86	873	113	37	57
20082	PRJEB27928	ERR2726486	90612	2168	141	1036	90	25	52
20083	PRJEB27928	ERR2726487	26396	1360	30	319	106	19	288
20084	PRJEB27928	ERR2726488	31496	879	15	484	169	46	8
20085	PRJEB27928	ERR2726489	20657	847	17	326	24	12	11
20086	PRJEB27928	ERR2726490	18895	783	15	325	37	8	10
20087	PRJEB27928	ERR2726491	19131	790	17	315	25	6	14
20088	PRJEB27928	ERR2726492	18220	801	20	314	35	9	11
100100	PRJEB7774	ERR688505	54581	1152	44	686	56	3	68
100101	PRJEB7774	ERR688506	153156	2547	12	1421	61	6	99
100102	PRJEB7774	ERR688507	83010	2453	58	904	344	236	25
100103	PRJEB7774	ERR688509	86736	2930	17	1431	81	5	106
100104	PRJEB7774	ERR688510	79856	4995	2	231	256	74	24
100105	PRJEB7774	ERR688511	69447	3398	58	558	118	1	9
100107	PRJEB7774	ERR688514	134113	1546	49	836	122	1	106
100108	PRJEB7774	ERR688515	63243	1133	91	862	65	6	46
100109	PRJEB7774	ERR688516	88261	1650	34	594	223	3	21
100110	PRJEB7774	ERR688517	786652	2051	109	501	31	291	97
100111	PRJEB7774	ERR688520	69707	2047	15	810	25	8	73
100112	PRJEB7774	ERR688521	71930	2195	55	1239	75	2	67
100113	PRJEB7774	ERR688523	77135	2412	52	961	207	148	97
100114	PRJEB7774	ERR688525	274260	1160	61	890	109	55	57
100115	PRJEB7774	ERR688527	62524	1604	41	901	75	47	55
100116	PRJEB7774	ERR688528	146400	2167	54	596	206	7	139
100117	PRJEB7774	ERR688529	73743	2570	85	908	137	24	130
100118	PRJEB7774	ERR688530	145097	3751	8	598	453	10	16
100119	PRJEB7774	ERR688532	70320	5118	4	228	46	0	30
100120	PRJEB7774	ERR688563	81688	2217	3	456	11	75	35
100151	PRJEB7774	ERR688564	396941	3565	32	822	76	14	29
100152	PRJEB7774	ERR688565	73891	2618	28	1275	35	63	179
100153	PRJEB7774	ERR688566	67960	892	21	688	143	6	8
100154	PRJEB7774	ERR688567	460972	2988	29	520	132	264	97
100155	PRJEB7774	ERR688568	48060	1194	8	352	9	2	59
100156	PRJEB7774	ERR688569	1470400	2134	70	711	55	915	55
100157	PRJEB7774	ERR688570	116636	2323	56	647	57	36	102
100158	PRJEB7774	ERR688571	66003	3440	2	840	32	1	136
100159	PRJEB7774	ERR688572	86470	3281	20	1015	93	8	3
100160	PRJEB7774	ERR688573	72333	2589	32	799	25	139	11
100161	PRJEB7774	ERR688574	69307	2813	9	803	69	418	128
100162	PRJEB7774	ERR688575	98364	3176	40	780	208	16	114
100163	PRJEB7774	ERR688576	76672	1663	52	1265	87	36	89
100164	PRJEB7774	ERR688577	79641	2768	42	618	94	42	337
100165	PRJEB7774	ERR688578	63963	2687	141	545	92	26	22
100166	PRJEB7774	ERR688579	55830	1738	67	790	92	62	49
100167	PRJEB7774	ERR688580	313409	4808	22	572	85	6	13
100171	PRJEB7774	ERR688590	49799	2243	11	647	124	33	10
100172	PRJEB7774	ERR688591	70895	4039	3	563	76	40	15
100173	PRJEB7774	ERR688593	231831	1126	50	616	227	13	46
100174	PRJEB7774	ERR688594	71994	6533	0	326	72	50	3
100175	PRJEB7774	ERR688595	103230	1343	2	450	115	4	16
100176	PRJEB7774	ERR688596	84938	5006	7	523	79	11	19
100179	PRJEB7774	ERR688600	43161	856	36	458	39	75	46
200222	PRJNA397112	SRR5898908	15094	954	6	65	27	4	2
200230	PRJNA397112	SRR5898909	6178	538	1	84	4	2	82
200239	PRJNA397112	SRR5898910	15539	1740	0	24	11	8	196
200217	PRJNA397112	SRR5898911	10272	4015	0	65	55	5	24
200225	PRJNA397112	SRR5898912	8458	765	0	14	5	1	17
200231	PRJNA397112	SRR5898920	8131	682	4	22	28	0	8
200197	PRJNA397112	SRR5898921	13301	839	12	114	10	21	16
200223	PRJNA397112	SRR5898922	13584	1052	0	99	15	17	284
200211	PRJNA397112	SRR5898923	12682	3105	1	98	39	6	15
200221	PRJNA397112	SRR5898924	10290	1410	1	17	6	8	37
200212	PRJNA397112	SRR5898925	7272	1431	0	35	2	0	9
200232	PRJNA397112	SRR5898926	4990	904	1	13	13	3	9
200238	PRJNA397112	SRR5898948	4206	442	2	37	14	1	1
200237	PRJNA397112	SRR5898950	5005	523	0	32	5	4	33
200240	PRJNA397112	SRR5898954	4832	235	1	14	3	0	0
200242	PRJNA397112	SRR5898966	6620	1029	2	18	3	0	45
200199	PRJNA397112	SRR5898978	14467	1157	1	30	2	0	62
200201	PRJNA397112	SRR5898979	14686	2126	4	27	3	1	37
200229	PRJNA397112	SRR5898980	7029	521	4	17	19	4	44
200210	PRJNA397112	SRR5898981	7764	508	3	33	11	2	1
200184	PRJNA397112	SRR5898982	7791	694	10	33	28	0	1
200196	PRJNA397112	SRR5898983	27110	1117	0	263	4	1	1347
200227	PRJNA397112	SRR5898984	6973	778	8	28	3	1	8
200185	PRJNA397112	SRR5898985	8064	636	7	184	22	5	2
200214	PRJNA397112	SRR5898986	12519	1729	3	22	1	1	21
200195	PRJNA397112	SRR5898987	10307	780	33	36	7	4	8
200236	PRJNA397112	SRR5899005	7102	964	1	32	9	6	33
200235	PRJNA397112	SRR5899006	14734	1581	7	70	10	3	63
200234	PRJNA397112	SRR5899007	6712	955	0	17	5	0	50
200241	PRJNA397112	SRR5899017	4568	572	1	37	3	3	23
100182	PRJNA447983	SRR6915108	58867	1076	27	581	321	7	43
100183	PRJNA447983	SRR6915109	226002	3753	37	714	94	27	156
100184	PRJNA447983	SRR6915110	38172	1533	18	381	162	23	437
100185	PRJNA447983	SRR6915111	76884	5330	3	520	26	44	3
100186	PRJNA447983	SRR6915112	63886	1749	34	954	295	34	72
100188	PRJNA447983	SRR6915114	39322	1284	49	539	120	68	64
100189	PRJNA447983	SRR6915115	36803	1673	13	87	9	20	440
100190	PRJNA447983	SRR6915116	47543	1730	16	274	186	56	206
100191	PRJNA447983	SRR6915117	66468	1088	72	993	397	14	57
100192	PRJNA447983	SRR6915119	46423	2178	7	210	23	110	55
100193	PRJNA447983	SRR6915120	23310	1800	5	141	29	35	77
100194	PRJNA447983	SRR6915121	89267	4754	69	670	165	116	10
100196	PRJNA447983	SRR6915123	30840	990	25	294	17	82	41
100197	PRJNA447983	SRR6915125	82689	1107	8	648	480	15	130
100198	PRJNA447983	SRR6915126	80330	3666	28	717	460	4	104
100199	PRJNA447983	SRR6915127	234003	2864	55	332	188	27	5
100200	PRJNA447983	SRR6915128	104350	1674	7	458	37	59	173
100203	PRJNA447983	SRR6915131	150688	4114	48	1305	576	75	86
100204	PRJNA447983	SRR6915132	559255	1384	84	607	542	148	56
100207	PRJNA447983	SRR6915135	212914	724	19	410	145	12	131
100208	PRJNA447983	SRR6915136	89292	1065	27	897	85	4	87
100210	PRJNA447983	SRR6915144	67470	2150	133	528	83	2	142
10061	PRJNA447983	SRR6915169	28019	1330	11	313	100	42	10
10062	PRJNA447983	SRR6915170	39041	937	20	527	246	14	44
10063	PRJNA447983	SRR6915171	42884	1141	30	389	110	21	2
10064	PRJNA447983	SRR6915172	66626	4641	32	302	2	1	84
10065	PRJNA447983	SRR6915173	34408	855	12	285	240	6	58
10066	PRJNA447983	SRR6915174	47839	1297	39	465	85	32	106
10067	PRJNA447983	SRR6915175	40585	1606	15	572	95	42	89
10068	PRJNA447983	SRR6915176	29227	1096	18	281	109	8	66
10069	PRJNA447983	SRR6915177	120993	517	36	1011	106	24	241
10070	PRJNA447983	SRR6915178	70895	1860	24	264	43	22	82
10071	PRJNA447983	SRR6915179	109199	2211	36	850	341	81	225
10072	PRJNA447983	SRR6915180	52047	2686	17	625	79	222	291
10073	PRJNA447983	SRR6915181	277153	2064	50	510	193	60	140
10074	PRJNA447983	SRR6915182	799662	3497	66	349	73	101	118
10075	PRJNA447983	SRR6915183	244558	908	35	563	541	14	226
10076	PRJNA447983	SRR6915184	49730	2170	22	539	211	10	76
10077	PRJNA447983	SRR6915185	51629	566	17	454	364	15	22
10078	PRJNA447983	SRR6915186	87166	4908	9	332	329	45	314
10079	PRJNA447983	SRR6915187	25751	1260	12	177	125	89	0
10080	PRJNA447983	SRR6915188	46180	2336	45	346	95	52	97
10081	PRJNA447983	SRR6915189	127289	6574	28	886	581	146	16
10082	PRJNA447983	SRR6915190	108838	4564	116	745	217	96	12
200207	PRJNA397112	SRR8865572	51643	548	14	204	3	18	6
200190	PRJNA397112	SRR8865573	11298	932	11	67	6	28	17
200200	PRJNA397112	SRR8865574	10564	815	3	28	6	8	38
200188	PRJNA397112	SRR8865575	11602	861	4	21	6	34	43
200219	PRJNA397112	SRR8865576	9140	1040	0	54	5	2	30
200186	PRJNA397112	SRR8865577	15446	485	21	43	3	3	11
200202	PRJNA397112	SRR8865578	15355	613	8	46	2	23	26
200191	PRJNA397112	SRR8865579	15873	1025	7	55	5	51	35
200183	PRJNA397112	SRR8865580	17403	606	12	81	6	14	16
200203	PRJNA397112	SRR8865581	15036	918	4	61	2	43	31
200220	PRJNA397112	SRR8865582	9722	448	6	31	2	28	23
200205	PRJNA397112	SRR8865583	8375	568	11	47	4	21	8
200216	PRJNA397112	SRR8865584	23897	409	15	52	4	3	44
200192	PRJNA397112	SRR8865586	13490	387	3	27	8	2	29
200209	PRJNA397112	SRR8865587	25526	785	0	88	1	0	0
200224	PRJNA397112	SRR8865588	9475	456	0	29	0	2	138
200233	PRJNA397112	SRR8865589	38888	528	15	148	4	10	0
200228	PRJNA397112	SRR8865590	7941	627	2	38	0	10	15
200198	PRJNA397112	SRR8865591	10945	552	3	13	6	29	35
200213	PRJNA397112	SRR8865592	32889	259	3	39	1	24	13
200187	PRJNA397112	SRR8865593	13358	428	22	293	85	190	21
200189	PRJNA397112	SRR8865594	20623	777	7	58	10	0	3
200208	PRJNA397112	SRR8865595	10305	1130	0	62	3	5	14
200218	PRJNA397112	SRR8865596	22339	654	0	79	0	0	2
200193	PRJNA397112	SRR8865597	51639	392	6	51	4	0	8
200204	PRJNA397112	SRR8865598	48018	1945	9	215	23	3	60
200215	PRJNA397112	SRR8865599	17949	258	0	164	24	1	65
200194	PRJNA397112	SRR8865600	8822	314	7	48	10	0	8
200206	PRJNA397112	SRR8865601	20399	314	0	63	0	1	350

## Sheet: Kraken abundance tab.classes
#NAME	Project n°	run accession	Thermococci	Archaeoglobi	Methanopyri	Methanobacteria	Methanococci	Thermoplasmata	Halobacteria	Methanomicrobia	Nanohaloarchaea	Thermoprotei	Nitrososphaeria
1001	PRJDB4176	DRR127478	414	234	8	1275	2190	648	47725	4304	0	15538	2506
1002	PRJDB4176	DRR127481	734	76	60	565	410	1535	40523	3169	5	27905	180
1003	PRJDB4176	DRR127485	1235	241	124	78492	632	2515	64319	4748	44	29505	399
1004	PRJDB4176	DRR127488	616	264	119	1339	712	1536	67039	3767	115	45066	545
1005	PRJDB4176	DRR127491	253	49	7	341	215	395	15911	946	35	8679	176
1006	PRJDB4176	DRR127507	306	129	48	829	1552	764	41353	2033	0	10146	842
1007	PRJDB4176	DRR127509	407	67	35	12300	479	1042	38370	2541	21	17104	356
1008	PRJDB4176	DRR127514	160	57	26	478	524	519	30446	865	13	2834	179
1009	PRJDB4176	DRR127515	1646	466	130	253232	1148	3804	89247	7029	26	27850	1075
2001	PRJDB4176	DRR127517	686	160	14	1107	1064	1271	48787	3616	140	1028	243
2002	PRJDB4176	DRR127519	218	5	2	300	307	142	66299	1576	0	1902	167
2003	PRJDB4176	DRR127521	921	102	27	840	1434	2514	62663	6564	10	1725	750
2004	PRJDB4176	DRR127524	730	108	86	473	290	1072	42400	4117	7	1695	481
2005	PRJDB4176	DRR127532	701	157	34	3938	1135	1169	62428	2574	17	1325	438
2006	PRJDB4176	DRR127535	773	42	449	606	1247	819	55343	3647	22	2845	201
2007	PRJDB4176	DRR127536	380	85	48	832	728	952	40325	2937	11	837	287
2008	PRJDB4176	DRR127537	994	35	21	2079	765	1852	70939	3725	168	2511	545
2009	PRJDB4176	DRR127546	1893	193	76	23716	505	2394	64080	6350	37	1307	826
10010	PRJDB4176	DRR127552	826	274	17	1038	582	1504	46930	2962	8	28794	560
10011	PRJDB4176	DRR127557	529	65	11	819	1554	1620	55346	3122	0	20369	206
10012	PRJDB4176	DRR127559	692	107	70	983	2083	843	69132	3544	7	14086	1206
10013	PRJDB4176	DRR127567	1364	165	91	4006	665	2324	81757	3261	67	29983	318
10014	PRJDB4176	DRR127579	867	198	112	4163	1469	1280	59990	2041	10	5707	824
10015	PRJDB4176	DRR127580	337	37	14	324	278	705	25280	1335	11	14263	186
10016	PRJDB4176	DRR127583	589	74	25	588	331	1067	39737	3225	16	23269	703
10017	PRJDB4176	DRR127588	945	25	228	549	1039	1381	68516	3343	22	18178	206
10018	PRJDB4176	DRR127594	1854	190	14	1806	708	2331	88974	4922	78	40292	565
10019	PRJDB4176	DRR127596	352	37	0	534	723	405	26345	1382	1	9541	167
10020	PRJDB4176	DRR127597	381	457	10	383	224	1199	45704	1645	31	7488	150
10021	PRJDB4176	DRR127646	514	52	36	656	354	1523	47637	2858	4	6954	131
10022	PRJDB4176	DRR127647	1066	20	19	250	334	228	146343	2012	1	3454	37
10023	PRJDB4176	DRR127649	664	32	67	550	617	1197	41088	3974	0	7307	198
10024	PRJDB4176	DRR127666	704	122	55	434	563	1671	54190	3530	27	7340	463
10025	PRJDB4176	DRR127669	1014	255	53	866	430	2672	60077	4772	32	5948	309
10026	PRJDB4176	DRR127672	550	199	12	671	460	1167	38959	2512	33	4797	269
10027	PRJDB4176	DRR127674	712	80	20	394	571	1706	55232	3041	36	7106	326
10028	PRJDB4176	DRR127683	338	31	40	1940	3506	807	84100	1844	37	5941	684
10029	PRJDB4176	DRR127685	661	457	110	8254	373	1324	43951	2596	40	5608	211
10030	PRJDB4176	DRR127692	1493	528	217	10772	680	2659	64535	5388	59	7455	230
10031	PRJDB4176	DRR127700	479	20	14	454	422	890	56811	2529	0	9274	162
10032	PRJDB4176	DRR127704	2360	136	15	1174	316	1505	47889	3916	28	6023	296
10033	PRJDB4176	DRR127707	335	885	33	453	625	1589	55376	1468	4	8299	117
10034	PRJDB4176	DRR127708	454	54	21	447	292	800	31021	1694	25	3000	144
10035	PRJDB4176	DRR127713	586	65	44	347	362	1021	40371	2762	4	6265	80
10036	PRJDB4176	DRR127718	788	76	24	611	660	1511	51247	3803	18	6742	273
10037	PRJDB4176	DRR127720	333	40	21	244	211	402	42556	1799	1	7449	69
10038	PRJDB4176	DRR127721	752	64	97	658	3208	543	97249	3376	17	5989	429
10039	PRJDB4176	DRR127724	593	95	136	768	302	1790	44961	3168	43	4612	179
10040	PRJDB4176	DRR127728	1091	169	899	1104	479	1820	40753	3893	0	3840	284
10041	PRJDB4176	DRR127731	545	97	22	516	253	1388	41112	2836	40	5581	216
10042	PRJDB4176	DRR127737	1007	146	5	856	877	1984	74988	4106	25	8261	579
10043	PRJDB4176	DRR127748	500	207	64	16550	268	1240	33270	2258	0	4256	180
10044	PRJDB4176	DRR127751	431	100	26	417	401	488	45678	2116	0	6912	361
10045	PRJDB4176	DRR127752	635	44	17	188	265	512	68528	1709	0	5198	129
10046	PRJDB4176	DRR127754	1084	120	208	402	568	1994	60064	4041	6	7218	372
10047	PRJDB4176	DRR127755	438	53	51	737	1746	450	82721	1512	0	8261	313
10048	PRJDB4176	DRR127756	716	55	9	718	347	1026	39624	3230	20	21186	378
10049	PRJDB4176	DRR127762	704	36	2	937	393	487	31227	1183	0	35797	72
10050	PRJDB4176	DRR127763	945	186	43	716	801	1737	65150	4215	1	31830	423
10052	PRJDB4176	DRR127767	489	108	25	504	1120	696	63240	2324	19	30026	307
10053	PRJDB4176	DRR127774	569	62	21	730	557	882	44988	3231	0	12511	132
10054	PRJDB4176	DRR127776	1375	75	118	964	2472	2288	98664	6008	0	23506	464
10055	PRJDB4176	DRR127777	788	32	9	1572	5241	627	51252	2210	264	13023	469
10056	PRJDB4176	DRR127789	1219	147	44	625	817	1528	49566	3508	3	16988	205
10057	PRJDB4176	DRR162775	665	120	214	1374	848	1092	61443	2465	53	16434	337
10058	PRJDB4176	DRR162776	587	183	49	1338	1532	1102	69222	2786	24	20573	514
10059	PRJDB4176	DRR162777	845	639	48	958	407	1375	49254	2254	29	23556	369
10060	PRJDB4176	DRR162778	860	188	49	760	373	1800	44457	3399	84	19276	240
10061	PRJEB10878	ERR1018185	420	19	37	235	356	788	24357	1479	11	1330	146
10062	PRJEB10878	ERR1018186	626	46	52	737	527	914	33633	2006	57	937	213
10063	PRJEB10878	ERR1018188	548	47	9	573	545	817	37967	1951	9	1141	228
10064	PRJEB10878	ERR1018189	665	66	40	408	667	1615	57837	4661	0	4641	109
10065	PRJEB10878	ERR1018190	275	59	5	7001	341	766	24286	1323	46	855	209
10066	PRJEB10878	ERR1018191	599	81	8	471	792	1350	41068	2849	19	1297	336
10067	PRJEB10878	ERR1018192	465	65	6	488	460	946	35989	1706	20	1606	336
10068	PRJEB10878	ERR1018193	304	167	7	3237	362	625	23221	738	24	1096	145
10069	PRJEB10878	ERR1018194	581	161	50	85970	654	1479	29790	1710	43	517	631
10070	PRJEB10878	ERR1018195	1034	106	126	534	1175	1425	62231	3264	2	1860	156
10071	PRJEB10878	ERR1018196	832	117	59	26949	695	1868	73541	3902	30	2211	373
10072	PRJEB10878	ERR1018197	537	107	38	541	978	1189	45652	2269	19	2686	508
10073	PRJEB10878	ERR1018198	814	157	222	224597	614	1709	44985	2715	29	2064	289
10074	PRJEB10878	ERR1018199	801	343	147	728572	585	2130	61430	4090	3	3497	185
10075	PRJEB10878	ERR1018200	632	135	183	189831	1136	1703	47032	2792	89	908	283
10076	PRJEB10878	ERR1018201	487	69	10	427	384	1078	44665	1915	43	2170	321
10077	PRJEB10878	ERR1018202	679	85	43	6706	558	1316	39449	2124	42	566	232
10078	PRJEB10878	ERR1018203	909	98	111	20386	1089	1320	58892	3357	3	4908	185
10079	PRJEB10878	ERR1018204	341	41	18	129	175	483	23128	1093	5	1260	112
10080	PRJEB10878	ERR1018205	691	54	28	346	320	1284	40510	2052	10	2336	235
10081	PRJEB10878	ERR1018206	1582	263	24	731	1310	2651	114544	5104	11	6574	428
10082	PRJEB10878	ERR1018207	1968	430	150	651	420	3919	92438	7517	5	4564	437
10083	PRJEB10878	ERR1018208	988	172	323	13910	784	1480	64376	3260	9	1489	423
10084	PRJEB10878	ERR1018209	848	89	56	475	700	1360	38567	2721	0	1028	196
10086	PRJEB10878	ERR1018210	814	124	88	1518	930	1939	49919	2768	10	1414	281
10087	PRJEB10878	ERR1018211	716	573	250	1513	987	1962	38927	2725	23	1582	603
10088	PRJEB10878	ERR1018212	399	39	8	503	209	562	28237	2268	7	2356	193
10089	PRJEB10878	ERR1018213	743	435	45	716	766	2024	58220	2859	7	2071	404
10090	PRJEB10878	ERR1018214	681	65	20	1056	965	713	50249	3299	3	3577	145
10091	PRJEB10878	ERR1018215	1448	642	232	666	614	2217	59281	4726	7	16203	384
10092	PRJEB10878	ERR1018216	506	121	13	585	728	1080	40926	2269	3	15404	353
10093	PRJEB10878	ERR1018217	1191	51	3	579	596	1474	57225	5418	66	31687	422
10094	PRJEB10878	ERR1018218	878	278	64	1083	1399	1889	66738	3523	13	20992	673
10095	PRJEB10878	ERR1018219	1687	302	120	93729	429	2212	47586	4784	10	10746	392
10096	PRJEB10878	ERR1018220	592	171	5	742	2370	634	90766	2370	149	11257	191
10097	PRJEB10878	ERR1018221	273	103	42	441	416	404	25698	1496	0	4634	72
10098	PRJEB10878	ERR1018222	755	129	29	616	1050	1020	46127	3020	5	6202	580
10099	PRJEB10878	ERR1018223	1259	217	56	21071	1751	2053	88346	5134	27	8573	617
20010	PRJEB10878	ERR1018224	743	152	290	1460	520	1417	63507	3043	28	1544	333
20011	PRJEB10878	ERR1018225	932	130	25	14894	966	1612	53635	3335	97	1849	334
20012	PRJEB10878	ERR1018226	902	216	207	45266	529	12781	37423	2803	59	1165	531
20013	PRJEB10878	ERR1018227	625	115	6	941	597	1084	34425	2512	114	1230	321
20014	PRJEB10878	ERR1018228	482	122	1	1192	241	735	26041	1839	1	1274	152
20015	PRJEB10878	ERR1018229	259	38	20	19565	449	310	17440	871	2	1104	135
20016	PRJEB10878	ERR1018230	237	31	19	11483	409	283	17140	877	4	1017	133
20017	PRJEB10878	ERR1018232	256	28	21	11369	439	258	17025	873	7	1023	134
20018	PRJEB10878	ERR1018233	246	39	19	8098	420	259	16217	821	3	993	143
20019	PRJEB10878	ERR1018234	456	277	37	34888	229	14038	15100	1409	0	516	107
20020	PRJEB10878	ERR1018235	429	283	27	30381	232	13663	14730	1379	0	503	90
20021	PRJEB10878	ERR1018236	419	258	48	30809	262	13795	15123	1429	0	519	91
20022	PRJEB10878	ERR1018237	459	257	35	28353	232	13546	14889	1327	0	530	103
20023	PRJEB10878	ERR1018238	1287	113	101	47560	251	2388	46818	10996	7	1250	820
20024	PRJEB10878	ERR1018239	583	73	68	15912	522	742	26729	1404	8	934	203
20025	PRJEB10878	ERR1018240	929	109	23	2730	520	1420	49351	2886	98	859	323
20026	PRJEB10878	ERR1018241	539	69	17	698	339	965	37919	2772	67	1888	149
20027	PRJEB10878	ERR1018242	532	209	45	24041	288	9040	23569	1959	5	845	249
20028	PRJEB10878	ERR1018246	523	219	51	22811	249	8760	22747	1902	9	830	228
20029	PRJEB10878	ERR1018247	497	197	45	22633	239	8757	22686	1926	3	793	211
20030	PRJEB10878	ERR1018248	482	200	41	21866	239	8650	21956	1814	14	773	236
20031	PRJEB10878	ERR1018249	1241	546	155	8496	563	2789	56380	5100	15	1415	646
20032	PRJEB10878	ERR1018250	332	37	5	522	270	404	19149	1004	6	1116	147
20033	PRJEB10878	ERR1018251	816	224	129	55815	340	1361	34726	2545	17	1281	248
20034	PRJEB10878	ERR1018252	671	313	39	5878	511	1231	38749	2848	50	3362	240
20035	PRJEB10878	ERR1018253	850	180	37	99142	433	1838	28734	1900	10	889	354
20036	PRJEB10878	ERR1018254	915	202	111	3566	584	1655	44926	2916	40	1810	491
20037	PRJEB10878	ERR1018256	780	139	121	51803	697	1475	37805	2427	7	1936	319
20038	PRJEB10878	ERR1018257	691	151	17	4541	426	1175	39822	2545	26	1229	329
20039	PRJEB10878	ERR1018258	1457	82	62	2159	990	1554	66867	3644	22	2169	736
20040	PRJEB10878	ERR1018259	1847	174	69	2805	626	1755	76187	6274	73	1971	992
20041	PRJEB10878	ERR1018260	434	225	104	36772	257	723	18786	1362	6	499	136
20042	PRJEB10878	ERR1018261	452	204	88	35361	242	734	18225	1318	4	512	118
20043	PRJEB10878	ERR1018262	460	208	93	35159	233	685	17961	1374	4	521	127
20044	PRJEB10878	ERR1018263	415	217	84	34061	223	738	17371	1218	1	452	129
20045	PRJEB10878	ERR1018264	779	111	30	8710	723	1162	42439	3321	107	2176	417
20046	PRJEB10878	ERR1018265	1044	153	15	6053	896	1623	56332	3723	72	2466	617
20047	PRJEB10878	ERR1018266	535	75	46	6539	277	1083	25777	1944	47	850	165
20048	PRJEB10878	ERR1018267	709	78	43	17274	558	1361	45689	3734	115	1922	618
20049	PRJEB10878	ERR1018268	229	33	2	991	218	428	18238	1043	15	1381	119
20050	PRJEB10878	ERR1018269	226	36	6	754	185	463	17020	1029	6	1323	121
20051	PRJEB10878	ERR1018270	207	28	4	752	210	436	16929	1008	13	1302	99
20052	PRJEB10878	ERR1018271	199	33	3	653	174	394	16358	889	10	1245	95
20053	PRJEB10878	ERR1018272	404	22	5	1156	434	1678	32739	2398	161	1724	307
20054	PRJEB10878	ERR1018273	1068	349	67	4013	372	1477	56042	3627	4	3115	522
20055	PRJEB10878	ERR1018274	1576	143	96	2788	533	17209	59752	5129	29	1353	524
20056	PRJEB10878	ERR1018275	1340	185	17	11710	193	1200	32887	4866	1	471	323
20057	PRJEB10878	ERR1018276	1292	104	10	8109	696	1928	66438	5157	128	2418	652
20058	PRJEB10878	ERR1018277	834	142	57	9297	373	1676	40938	3185	35	2416	410
20059	PRJEB10878	ERR1018278	289	53	17	9159	206	412	14421	1365	8	727	155
20060	PRJEB10878	ERR1018279	327	54	17	5409	196	453	13996	1274	17	688	145
20061	PRJEB10878	ERR1018280	327	47	18	5397	190	457	13995	1356	18	677	149
20062	PRJEB10878	ERR1018281	286	45	18	3925	184	399	13336	1178	11	710	140
20063	PRJEB10878	ERR1018282	430	155	71	1081	254	7068	23695	1612	9	656	236
20064	PRJEB10878	ERR1018283	443	129	83	880	255	7082	23120	1482	16	648	235
20065	PRJEB10878	ERR1018284	423	130	63	830	234	7042	22666	1441	13	644	285
20066	PRJEB27928	ERR2726404	414	138	58	710	253	6950	22104	1385	13	631	242
20067	PRJEB27928	ERR2726405	993	148	60	5169	649	1953	53812	4730	82	2178	514
20068	PRJEB27928	ERR2726406	956	152	35	812	403	1147	35886	2090	128	1551	269
20069	PRJEB27928	ERR2726407	585	109	19	932	380	1053	29072	2050	2	919	252
20070	PRJEB27928	ERR2726408	980	138	44	13709	619	1474	40821	3355	26	1581	334
20071	PRJEB27928	ERR2726409	1203	38	11	1885	562	998	50704	2296	41	3074	284
20072	PRJEB27928	ERR2726410	436	42	15	1142	508	780	26903	1815	123	1196	185
20073	PRJEB27928	ERR2726411	367	29	16	807	473	745	25724	1767	116	1113	162
20074	PRJEB27928	ERR2726412	379	40	8	817	499	701	25552	1752	113	1127	190
20075	PRJEB27928	ERR2726413	370	35	22	589	491	694	24321	1617	110	1006	176
20076	PRJEB27928	ERR2726414	555	80	90	817	238	942	23135	1855	1	686	197
20077	PRJEB27928	ERR2726415	536	99	80	563	216	905	22693	1836	4	666	209
20078	PRJEB27928	ERR2726416	536	87	79	571	196	941	22400	1753	3	624	244
20079	PRJEB27928	ERR2726417	543	75	82	430	190	920	21891	1683	4	629	179
20080	PRJEB27928	ERR2726418	505	112	37	6534	404	744	25730	1985	9	1196	523
20081	PRJEB27928	ERR2726419	854	190	55	13212	463	1181	42366	3141	81	1224	382
20082	PRJEB27928	ERR2726420	1299	231	259	18122	572	10728	54594	3899	8	2168	616
20083	PRJEB27928	ERR2726421	322	99	14	1648	196	1087	21328	1460	18	1360	163
20084	PRJEB27928	ERR2726422	583	90	26	788	261	834	26401	2270	52	879	208
20085	PRJEB27928	ERR2726423	195	43	163	5255	154	364	13160	1037	6	847	236
20086	PRJEB27928	ERR2726424	221	44	141	4272	160	299	12514	955	4	783	226
20087	PRJEB27928	ERR2726425	212	36	162	4101	132	362	12794	1007	2	790	212
20088	PRJEB27928	ERR2726426	225	32	169	3376	153	313	12686	950	1	801	212
100100	PRJEB27928	ERR2726427	556	122	15	1029	1054	1143	48050	2416	3	1152	465
100101	PRJEB27928	ERR2726428	1209	307	334	80074	2026	1688	61919	4860	33	2547	528
100102	PRJEB27928	ERR2726429	1249	188	88	3133	1263	2285	69299	5023	77	2453	613
100103	PRJEB27928	ERR2726430	1237	274	102	3916	1313	1951	72608	4752	10	2930	715
100104	PRJEB27928	ERR2726431	828	36	242	3343	2076	1455	66026	4377	0	4995	88
100105	PRJEB27928	ERR2726432	884	125	167	2318	1387	1654	58183	4103	23	3398	449
100107	PRJEB27928	ERR2726433	1148	321	42	64228	1178	5709	56863	4008	19	1546	462
100108	PRJEB27928	ERR2726434	1296	223	189	918	1040	3059	51725	4146	16	1133	627
100109	PRJEB27928	ERR2726435	990	124	52	21968	859	1732	57965	3904	54	1650	370
100110	PRJEB27928	ERR2726436	1016	566	87	732905	646	4039	41897	4305	3	2051	337
100111	PRJEB27928	ERR2726437	1285	212	31	2224	1038	1677	57584	4939	10	2047	323
100112	PRJEB27928	ERR2726438	807	243	62	1355	1945	2448	61505	3116	0	2195	829
100113	PRJEB27928	ERR2726439	1185	164	242	3230	1311	2144	63174	4697	50	2412	539
100114	PRJEB27928	ERR2726440	886	214	127	225093	1189	1574	41769	2914	13	1160	408
100115	PRJEB27928	ERR2726441	1116	257	148	2036	806	2464	50202	4845	4	1604	485
100116	PRJEB27928	ERR2726442	1336	156	95	81759	1144	1511	54128	4979	31	2167	359
100117	PRJEB27928	ERR2726443	1668	264	126	3461	1013	2400	57933	5641	41	2570	523
100118	PRJEB27928	ERR2726444	1391	192	82	59188	1518	2594	73870	5499	103	3751	291
100119	PRJEB27928	ERR2726453	1095	47	245	1328	507	1662	60082	4748	2	5118	121
100120	PRJEB27928	ERR2726454	634	150	60	5371	2484	1520	66243	4375	15	2217	254
100121	PRJEB27928	ERR2726455	341	34	5	672	942	633	81868	1552	52	2578	133
100122	PRJEB27928	ERR2726456	501	33	19	897	2060	826	79367	2883	5	1806	330
100123	PRJEB27928	ERR2726457	633	87	3	902	666	922	35365	3355	3	3805	128
100124	PRJEB27928	ERR2726458	886	125	128	340904	517	1905	50108	3791	0	2991	283
100125	PRJEB27928	ERR2726459	843	362	96	4643	654	1395	48204	3666	16	3051	236
100126	PRJEB27928	ERR2726460	814	233	27	824	846	1345	53264	5054	13	1633	429
100127	PRJEB27928	ERR2726461	221	115	46	642	586	383	14226	5945	0	1174	539
100128	PRJEB27928	ERR2726462	519	89	71	3013	1540	1104	49642	4443	17	1961	356
100129	PRJEB27928	ERR2726463	469	68	5	326	447	826	36077	2255	43	1190	266
100130	PRJEB27928	ERR2726464	424	36	10	2752	175	429	50320	1554	1	1640	346
100131	PRJEB27928	ERR2726465	339	93	71	699	1732	435	45304	2003	1	3610	507
100132	PRJEB27928	ERR2726466	229	196	743	129	184	223	29874	1032	0	1522	159
100133	PRJEB27928	ERR2726467	368	59	14	479	798	512	35733	4625	5	3375	177
100134	PRJEB27928	ERR2726468	576	15	9	1077	607	1187	34736	1882	4	2319	141
100135	PRJEB27928	ERR2726469	302	104	20	624	1372	434	39912	1739	10	2315	176
100136	PRJEB27928	ERR2726470	896	62	10	153	228	409	122828	902	10	265	100
100137	PRJEB27928	ERR2726471	411	72	7	298	460	642	22067	1884	2	1193	100
100138	PRJEB27928	ERR2726472	610	84	11	865	662	722	34751	2702	1	3401	261
100139	PRJEB27928	ERR2726473	1128	187	153	1715	806	3036	56452	5152	8	1908	666
100140	PRJEB27928	ERR2726474	1073	200	125	2097	626	2504	50970	4839	2	3268	367
100141	PRJEB27928	ERR2726475	621	83	58	2133	2610	461	56377	11545	108	2040	1451
100142	PRJEB27928	ERR2726476	390	50	35	676	726	543	36166	2328	5	3220	68
100143	PRJEB27928	ERR2726477	1109	316	102	1845	1923	1794	73274	3295	7	2759	809
100144	PRJEB27928	ERR2726478	1029	61	40	948	1050	1299	45201	3540	0	2052	464
100145	PRJEB27928	ERR2726479	1060	184	25	1832	1647	1609	66440	3461	137	1487	491
100146	PRJEB27928	ERR2726480	679	61	41	932	795	1094	44124	4393	75	2237	300
100147	PRJEB27928	ERR2726481	668	199	72	1592	1534	822	53407	4179	9	4701	293
100148	PRJEB27928	ERR2726482	1275	111	233	1118	1228	2748	63097	4791	43	2548	563
100149	PRJEB27928	ERR2726483	1208	527	205	826	772	2660	47235	4185	1	2015	397
100150	PRJEB27928	ERR2726484	1102	235	281	228118	439	2066	48509	4341	1	1875	261
100151	PRJEB27928	ERR2726485	1714	151	82	313541	1226	2685	71039	5825	30	3565	565
100152	PRJEB27928	ERR2726486	1305	191	180	3804	1395	1961	58655	5379	26	2618	799
100153	PRJEB27928	ERR2726487	1037	189	2	2171	1002	1585	57816	3869	48	892	443
100154	PRJEB27928	ERR2726488	1034	162	200	404925	769	1278	48120	3844	47	2988	326
100155	PRJEB27928	ERR2726489	1154	141	3	3037	1082	1148	38029	3143	1	1194	269
100156	PRJEB27928	ERR2726490	951	363	398	1413055	1265	1582	47859	4171	7	2134	357
100157	PRJEB27928	ERR2726491	544	112	29	64911	702	1103	45897	2682	18	2323	365
100158	PRJEB27928	ERR2726492	482	52	1	4740	1446	1019	53250	4714	12	3440	325
100159	PRJEB7774	ERR688505	897	253	55	1349	1822	2960	73713	5044	59	3281	591
100160	PRJEB7774	ERR688506	1229	129	63	1569	966	1842	60945	5217	1	2589	385
100161	PRJEB7774	ERR688507	836	195	468	11386	952	2196	48945	3712	7	2813	463
100162	PRJEB7774	ERR688509	1059	121	294	39938	722	1853	48493	4938	40	3176	494
100163	PRJEB7774	ERR688510	1527	102	110	1124	1142	2639	64959	4531	15	1663	615
100164	PRJEB7774	ERR688511	902	146	76	1188	590	1509	70337	3947	10	2768	345
100165	PRJEB7774	ERR688514	1027	107	113	4153	504	1727	51822	4137	20	2687	323
100166	PRJEB7774	ERR688515	878	134	108	895	860	1724	46737	3918	9	1738	484
100167	PRJEB7774	ERR688516	1031	150	80	216894	634	1820	87283	4424	12	4808	319
100171	PRJEB7774	ERR688517	788	114	103	2168	1221	1544	39809	3368	21	2243	388
100172	PRJEB7774	ERR688520	904	283	79	3187	1217	1267	59125	4349	21	4039	231
100173	PRJEB7774	ERR688521	864	246	55	172815	787	2247	50603	3550	56	1126	343
100174	PRJEB7774	ERR688523	1007	60	16	2612	894	1751	60122	4747	12	6533	265
100175	PRJEB7774	ERR688525	1006	73	57	11722	567	942	85192	2321	37	1343	245
100176	PRJEB7774	ERR688527	1339	134	21	2919	1305	2055	71060	5522	15	5006	367
100179	PRJEB7774	ERR688528	633	309	40	985	709	1352	35953	2506	2	856	249
100182	PRJEB7774	ERR688529	733	87	34	19735	514	922	34484	1841	54	1076	380
100183	PRJEB7774	ERR688530	1193	216	63	143410	916	2400	72579	4070	15	3753	292
100184	PRJEB7774	ERR688532	390	29	29	328	509	690	33904	1590	31	1533	302
100185	PRJEB7774	ERR688563	869	79	11	532	654	974	69110	3450	0	5330	242
100186	PRJEB7774	ERR688564	845	106	52	1103	786	1701	55344	2743	46	1749	612
100188	PRJEB7774	ERR688565	455	78	9	647	465	746	34538	1953	0	1284	446
100189	PRJEB7774	ERR688566	596	145	150	273	412	973	31481	2302	0	1673	45
100190	PRJEB7774	ERR688567	1050	88	91	508	286	1169	41239	2051	3	1730	124
100191	PRJEB7774	ERR688568	784	79	45	4182	1015	1339	55480	2581	77	1088	575
100192	PRJEB7774	ERR688569	1126	32	39	59	130	942	39694	4152	1	2178	154
100193	PRJEB7774	ERR688570	411	167	12	113	169	449	20422	1303	5	1800	72
100194	PRJEB7774	ERR688571	2702	336	109	338	377	3251	75002	6325	14	4754	417
100196	PRJEB7774	ERR688572	420	236	222	534	150	1122	26041	1464	0	990	169
100197	PRJEB7774	ERR688573	841	124	51	1081	962	1364	73994	2810	94	1107	350
100198	PRJEB7774	ERR688574	871	36	87	699	2251	1860	68292	5281	79	3666	522
100199	PRJEB7774	ERR688575	980	96	72	153056	869	12678	60563	4604	12	2864	221
100200	PRJEB7774	ERR688576	663	153	33	39089	997	1206	59748	1744	14	1674	189
100203	PRJEB7774	ERR688577	1435	207	159	46732	1492	2798	91299	5167	108	4114	793
100204	PRJEB7774	ERR688578	769	600	117	487572	1292	1873	60968	2981	89	1384	429
100207	PRJEB7774	ERR688579	408	135	72	178523	677	1129	29762	1583	28	724	238
100208	PRJEB7774	ERR688580	740	201	181	35808	1095	1369	46755	2356	14	1065	449
100210	PRJEB7774	ERR688590	1409	145	182	488	159	2385	56642	5615	1	2150	306
100211	PRJEB7774	ERR688591	1101	612	593	1589	1194	2305	41850	3871	2	1459	421
100212	PRJEB7774	ERR688593	467	78	2	1345	1488	1243	56516	4065	37	508	659
100213	PRJEB7774	ERR688594	907	112	44	14347	369	1032	38034	2260	11	3463	192
100214	PRJEB7774	ERR688595	928	251	31	1059	921	3250	50393	4697	36	1862	635
100215	PRJEB7774	ERR688596	890	56	11	1899	2474	1145	62907	3869	57	2301	332
100216	PRJEB7774	ERR688600	1017	199	149	115019	1578	2379	65451	4016	14	2474	455
100217	PRJNA397112	SRR5898908	1300	141	258	1169	2097	2207	90004	4306	4	1690	589
100218	PRJNA397112	SRR5898909	1169	316	65	680	560	2738	55782	5314	11	2062	367
100220	PRJNA397112	SRR5898910	1016	160	139	1285	2408	2819	70467	5982	56	1369	803
100221	PRJNA397112	SRR5898911	640	112	69	1440	3801	727	52417	3442	4	4383	389
100222	PRJNA397112	SRR5898912	802	4	9	267	230	88	186744	2995	8	612	30
100223	PRJNA397112	SRR5898920	1250	204	143	57822	1299	2240	63066	5364	75	2117	555
100224	PRJNA397112	SRR5898921	571	30	41	718	372	1415	46056	2068	14	4531	302
100225	PRJNA397112	SRR5898922	712	118	1	836	851	654	61625	3139	5	3318	842
100226	PRJNA397112	SRR5898923	2189	204	26	1554	1680	3282	99527	4600	55	2303	810
100227	PRJNA397112	SRR5898924	902	266	59	841	776	3241	60787	5441	5	2336	359
100228	PRJNA397112	SRR5898925	844	95	41	32254	1165	1426	52901	2877	31	3585	278
100229	PRJNA397112	SRR5898926	393	82	32	906	874	714	38752	3306	0	3456	189
100230	PRJNA397112	SRR5898948	972	90	15	1113	721	906	89373	3588	18	1043	588
100231	PRJNA397112	SRR5898950	954	167	83	9691	1201	1577	53576	3196	78	2039	484
100232	PRJNA397112	SRR5898954	769	126	25	604	506	1343	78774	3125	31	1145	336
100233	PRJNA397112	SRR5898966	806	108	963	2378	946	2166	46734	4311	11	986	421
100234	PRJNA397112	SRR5898978	382	63	62	1627	521	621	25365	2005	29	1625	369
100235	PRJNA397112	SRR5898979	1431	77	24	5138	922	1512	64888	3747	21	665	417
100236	PRJNA397112	SRR5898980	418	101	17	509	712	975	44467	2758	6	2012	121
100237	PRJNA397112	SRR5898981	731	67	13	994	837	1937	50816	2904	34	1004	415
100238	PRJNA397112	SRR5898982	1027	106	49	571	719	1428	42612	4142	24	1915	307
100239	PRJNA397112	SRR5898983	919	130	106	1427	895	2488	62887	4903	16	2765	521
100241	PRJNA397112	SRR5898984	863	252	22	30800	770	1521	49077	3551	7	2253	247
100242	PRJNA397112	SRR5898985	1019	167	20	1209	1355	2558	53903	7324	24	1026	545
100243	PRJNA397112	SRR5898986	560	82	2	717	622	793	34821	1602	11	2713	248
100244	PRJNA397112	SRR5898987	738	89	57	1007	1382	1139	50340	2770	8	1288	327
100245	PRJNA397112	SRR5899005	284	27	1	856	1331	424	32286	3553	3	2849	93
100246	PRJNA397112	SRR5899006	863	131	17	1210	1354	1223	37694	9655	49	1028	753
100247	PRJNA397112	SRR5899007	1346	210	40	1667	2050	1712	61884	4519	7	2161	561
100248	PRJNA397112	SRR5899017	895	150	2	1610	1330	1490	49110	8003	14	1576	499
100249	PRJNA447983	SRR6915108	596	87	16	693	718	1417	90760	2809	45	1301	210
100250	PRJNA447983	SRR6915109	851	153	125	1181	810	1224	42398	3333	4	3459	273
100251	PRJNA447983	SRR6915110	1100	198	211	1067	936	2109	42668	5058	14	2387	431
100252	PRJNA447983	SRR6915111	1177	123	51	770	598	1239	34378	2460	3	1950	260
100253	PRJNA447983	SRR6915112	1215	361	217	35490	1207	19991	51288	4210	51	2211	399
100254	PRJNA447983	SRR6915114	558	81	13	1035	1036	1073	38236	4632	18	2064	248
100255	PRJNA447983	SRR6915115	825	114	3	982	1016	1383	50612	3335	92	3033	362
100256	PRJNA447983	SRR6915116	878	50	16	622	305	816	95946	1858	6	405	132
100257	PRJNA447983	SRR6915117	1184	175	119	118610	849	1556	47204	5539	19	2019	305
100258	PRJNA447983	SRR6915119	1054	227	78	995	684	2378	43650	3560	4	1197	256
100259	PRJNA447983	SRR6915120	892	415	49	1342	947	1307	41870	2592	43	2071	442
100260	PRJNA447983	SRR6915121	655	119	6	835	1003	1402	29630	3317	54	779	243
100261	PRJNA447983	SRR6915123	597	94	16	696	504	1025	31136	2503	87	2077	250
100262	PRJNA447983	SRR6915125	904	192	25	1241	1921	1633	69657	3136	1	1755	1223
200183	PRJNA447983	SRR6915126	288	34	84	4376	87	460	11060	678	0	606	44
200184	PRJNA447983	SRR6915127	90	13	17	423	53	160	6571	375	2	694	16
200185	PRJNA447983	SRR6915128	92	14	132	1024	172	177	5658	660	5	636	30
200186	PRJNA447983	SRR6915131	180	38	44	5242	76	340	8784	488	1	485	16
200187	PRJNA447983	SRR6915132	167	15	210	214	117	476	10875	762	15	428	51
200188	PRJNA447983	SRR6915135	106	2	6	3180	35	68	7632	418	0	861	17
200189	PRJNA447983	SRR6915136	114	8	55	432	46	99	19130	385	0	777	18
200190	PRJNA447983	SRR6915144	221	11	88	1182	79	298	8686	453	1	932	44
200191	PRJNA447983	SRR6915169	201	17	15	4559	79	198	10114	512	0	1025	36
200192	PRJNA447983	SRR6915170	98	6	2	79	72	146	12452	425	1	387	13
200193	PRJNA447983	SRR6915171	90	28	84	45877	52	400	4456	271	2	392	10
200194	PRJNA447983	SRR6915172	140	8	170	147	30	186	7488	389	0	314	25
200195	PRJNA447983	SRR6915173	190	31	16	365	46	306	8543	697	0	780	26
200196	PRJNA447983	SRR6915174	276	0	19	237	231	44	22656	1802	1	1117	244
200197	PRJNA447983	SRR6915175	149	19	40	1778	143	267	10092	511	3	839	73
200198	PRJNA447983	SRR6915176	68	12	10	5139	20	70	5273	274	0	552	7
200199	PRJNA447983	SRR6915177	110	1	2	899	94	160	12491	509	0	1157	22
200200	PRJNA447983	SRR6915178	105	8	13	3334	41	83	6500	344	0	815	20
200201	PRJNA447983	SRR6915179	69	4	1	576	65	284	13089	489	0	2126	21
200202	PRJNA447983	SRR6915180	139	42	26	6984	43	259	7142	477	0	613	20
200203	PRJNA447983	SRR6915181	230	26	15	3943	69	202	9958	438	0	918	35
200204	PRJNA447983	SRR6915182	394	21	97	452	141	501	44186	1212	0	1945	138
200205	PRJNA447983	SRR6915183	167	11	106	1442	48	282	5729	358	0	568	17
200206	PRJNA447983	SRR6915184	127	3	3	316	110	79	18762	418	0	314	25
200207	PRJNA447983	SRR6915185	204	34	63	42578	134	819	6855	678	0	548	87
200208	PRJNA447983	SRR6915186	173	1	2	13	37	87	9403	361	0	1130	56
200209	PRJNA447983	SRR6915187	96	0	5	27	23	201	24090	422	0	785	21
200210	PRJNA447983	SRR6915188	111	7	25	1613	67	217	5255	298	1	508	15
200211	PRJNA447983	SRR6915189	187	5	11	3168	107	157	8269	444	0	3105	34
200212	PRJNA447983	SRR6915190	45	9	0	1301	17	80	5543	246	4	1431	2
200213	PRJNA397112	SRR8865572	35	14	2	29835	17	71	2681	199	0	259	28
200214	PRJNA397112	SRR8865573	51	2	2	607	75	239	11040	418	0	1729	11
200215	PRJNA397112	SRR8865574	138	8	4	54	112	217	16631	381	0	258	119
200216	PRJNA397112	SRR8865575	177	19	34	14598	90	340	7739	607	1	409	28
200217	PRJNA397112	SRR8865576	114	1	4	2015	160	76	6446	1245	7	4015	59
200218	PRJNA397112	SRR8865577	78	1	5	11	23	161	21146	362	0	654	11
200219	PRJNA397112	SRR8865578	137	3	6	21	54	46	8276	361	0	1040	45
200220	PRJNA397112	SRR8865579	62	16	19	4288	31	113	4812	259	0	448	23
200221	PRJNA397112	SRR8865580	107	15	2	1486	35	199	7940	407	1	1410	9
200222	PRJNA397112	SRR8865581	99	15	14	6809	85	175	7396	408	7	954	22
200223	PRJNA397112	SRR8865582	104	9	5	1928	135	103	10104	715	0	1052	84
200224	PRJNA397112	SRR8865583	58	2	0	43	64	31	8587	327	0	456	13
200225	PRJNA397112	SRR8865584	83	22	1	3784	19	70	4157	288	0	765	8
200227	PRJNA397112	SRR8865586	40	4	18	242	41	70	6117	366	1	778	24
200228	PRJNA397112	SRR8865587	170	6	7	1246	54	134	5946	265	0	627	23
200229	PRJNA397112	SRR8865588	69	14	6	79	40	129	6200	358	0	521	9
200230	PRJNA397112	SRR8865589	62	1	5	685	52	93	4752	379	0	538	22
200231	PRJNA397112	SRR8865590	106	6	43	1308	76	147	6007	318	6	682	12
200232	PRJNA397112	SRR8865591	56	8	1	702	26	91	3842	206	3	904	6
200233	PRJNA397112	SRR8865592	122	23	50	32698	88	546	4697	455	0	528	67
200234	PRJNA397112	SRR8865593	39	0	2	407	39	111	5773	230	0	955	14
200235	PRJNA397112	SRR8865594	150	6	32	1169	183	212	12082	684	1	1581	36
200236	PRJNA397112	SRR8865595	106	3	1	424	71	321	5785	318	0	964	10
200237	PRJNA397112	SRR8865596	80	15	14	143	43	92	4262	304	0	523	11
200238	PRJNA397112	SRR8865597	54	4	0	254	45	81	3447	301	2	442	29
200239	PRJNA397112	SRR8865598	137	44	3	3428	72	187	10774	542	4	1740	12
200240	PRJNA397112	SRR8865599	13	1	0	2495	19	56	2126	84	0	235	11
200241	PRJNA397112	SRR8865600	66	14	13	149	39	88	3869	291	0	572	13
200242	PRJNA397112	SRR8865601	105	9	1	48	57	163	5765	377	1	1029	10

## Sheet: Kraken abundance tab.species
#ID	Project n°	run accession	Pyrococcus furiosus	Pyrococcus abyssi	Pyrococcus horikoshii	Pyrococcus yayanosii	Pyrococcus kukulkanii	Pyrococcus sp. NA2	Pyrococcus sp. ST04	Thermococcus celer	Thermococcus litoralis	Thermococcus profundus	Thermococcus peptonophilus	Thermococcus barossii	Thermococcus chitonophagus	Thermococcus barophilus	Thermococcus gorgonarius	Thermococcus pacificus	Thermococcus siculi	Thermococcus guaymasensis	Thermococcus cleftensis	Thermococcus sibiricus	Thermococcus gammatolerans	Thermococcus radiotolerans	Thermococcus nautili	Thermococcus thioreducens	Thermococcus kodakarensis	Thermococcus onnurineus	Thermococcus paralvinellae	Thermococcus eurythermalis	Thermococcus piezophilus	Thermococcus sp. P6	Thermococcus sp. AM4	Thermococcus sp. 4557	Thermococcus sp. 2319x1	Thermococcus sp. 5-4	Thermococcus sp. EXT12c	Thermococcus sp. IOH1	Thermococcus sp. SY113	Palaeococcus pacificus	Archaeoglobus fulgidus	Archaeoglobus veneficus	Archaeoglobus profundus	Archaeoglobus sulfaticallidus	Ferroglobus placidus	Geoglobus ahangari	Geoglobus acetivorans	Methanopyrus kandleri	Methanopyrus sp. KOL6
1001	PRJDB4176	DRR127478	0	0	0	0	4	7	0	1	9	0	3	1	0	14	10	17	8	0	3	1	88	5	6	7	4	0	0	10	13	46	17	3	0	0	9	6	45	1	208	0	9	2	5	10	0	3	1
1002	PRJDB4176	DRR127481	0	0	0	4	4	65	0	3	17	3	7	0	2	7	39	2	30	4	1	0	20	2	0	54	13	0	12	12	23	5	73	3	0	0	32	19	49	2	8	2	0	6	6	37	17	24	0
1003	PRJDB4176	DRR127485	1	0	3	0	6	38	40	8	28	18	20	42	4	7	75	24	50	3	2	0	41	25	139	52	12	45	37	3	30	6	52	14	0	3	101	12	15	7	43	10	0	3	126	58	0	29	1
1004	PRJDB4176	DRR127488	0	0	0	10	0	19	29	2	40	0	8	8	4	3	36	0	28	0	1	0	11	18	20	2	0	4	56	20	11	18	23	23	0	0	24	1	17	34	25	2	1	109	4	105	18	22	0
1005	PRJDB4176	DRR127491	0	0	0	0	0	9	0	0	1	0	0	0	3	3	26	0	9	0	0	1	14	2	1	8	1	0	7	7	22	0	30	14	0	0	12	7	20	21	33	6	0	9	0	1	0	5	0
1006	PRJDB4176	DRR127507	0	0	0	8	3	3	2	1	0	1	11	0	7	9	79	0	5	3	0	0	9	0	16	1	0	0	31	4	2	1	37	5	2	0	3	1	13	8	83	4	0	5	2	35	0	3	0
1007	PRJDB4176	DRR127509	0	0	0	0	0	3	16	2	0	4	19	1	0	3	14	7	13	1	3	1	32	7	1	0	0	0	2	23	3	3	21	29	0	1	19	1	58	21	36	6	0	0	14	9	0	28	0
1008	PRJDB4176	DRR127514	0	0	0	0	0	1	5	0	26	1	2	0	1	1	1	10	26	1	1	0	1	16	2	0	3	0	8	12	0	1	0	0	0	0	5	5	11	0	32	5	2	2	3	8	0	3	0
1009	PRJDB4176	DRR127515	2	4	0	14	1	9	4	26	22	3	32	21	12	14	50	24	127	9	24	20	149	14	35	18	14	1	30	11	93	17	59	47	21	4	104	51	126	23	195	7	0	29	64	159	8	67	1
2001	PRJEB10878	ERR1018278	0	0	1	3	1	29	16	0	25	0	5	7	42	0	60	10	54	4	0	2	10	51	64	8	6	2	0	6	2	5	91	1	0	2	30	0	14	0	76	46	33	0	4	0	1	1	0
2002	PRJEB10878	ERR1018279	0	0	0	0	0	0	1	0	2	0	15	0	6	1	0	0	0	0	0	0	7	0	1	0	6	20	1	0	0	132	0	1	0	0	0	0	21	1	0	0	0	0	1	2	0	1	0
2003	PRJEB10878	ERR1018280	0	0	0	1	0	15	53	1	43	0	122	7	17	1	27	0	80	1	4	6	9	40	16	39	1	3	28	16	22	1	24	9	0	3	68	5	89	2	71	10	0	3	7	10	1	2	14
2004	PRJEB10878	ERR1018281	0	0	0	3	5	50	3	32	9	20	11	7	29	5	28	22	71	5	14	0	23	0	30	3	10	9	9	6	43	14	76	0	0	1	54	22	14	1	25	1	0	7	62	12	1	5	0
2005	PRJEB10878	ERR1018282	0	1	0	15	0	55	9	12	3	0	114	0	27	2	2	1	34	0	2	7	20	3	30	1	9	97	7	4	16	12	26	1	0	3	48	1	20	1	40	16	7	4	71	14	4	15	0
2006	PRJEB10878	ERR1018283	0	0	0	4	0	0	0	2	0	0	45	0	14	2	50	2	9	0	1	0	95	12	12	0	18	57	6	4	42	12	34	10	0	131	26	1	31	5	14	0	0	1	4	21	0	54	0
2007	PRJEB10878	ERR1018284	0	0	0	0	0	0	1	7	5	2	10	0	21	1	17	4	100	2	3	2	9	14	7	2	2	5	8	8	14	3	29	3	0	2	47	2	4	5	64	8	0	0	8	1	2	4	4
2008	PRJEB27928	ERR2726404	0	0	0	0	2	25	5	0	44	0	1	9	8	2	159	8	84	1	0	7	30	0	74	42	38	12	4	16	19	35	111	11	0	0	23	47	49	7	13	1	0	13	1	4	0	13	1
2009	PRJEB27928	ERR2726405	0	0	0	16	0	2	6	11	11	7	40	50	5	0	79	59	264	3	11	2	41	27	123	83	15	38	1	4	23	15	181	0	0	7	279	51	102	3	71	1	0	5	20	96	0	20	2
10010	PRJDB4176	DRR127517	0	0	0	1	0	82	99	3	54	0	7	19	1	1	70	2	34	1	3	1	18	7	13	1	3	9	72	7	27	10	59	15	1	0	35	30	24	0	52	7	0	4	26	185	0	4	5
10011	PRJDB4176	DRR127519	0	0	0	0	0	18	0	0	8	0	6	0	0	14	130	0	3	0	0	0	15	0	1	28	0	0	0	0	0	0	41	7	2	0	103	1	69	11	44	4	0	1	0	15	0	1	8
10012	PRJDB4176	DRR127521	1	0	0	3	0	38	9	0	0	0	14	0	0	8	37	15	23	7	0	0	83	22	18	38	10	17	1	13	33	9	55	2	0	7	13	6	93	0	72	4	0	4	0	27	0	57	0
10013	PRJDB4176	DRR127524	0	0	6	19	2	20	43	6	42	4	26	25	0	1	74	15	20	5	6	3	7	5	35	6	1	18	68	21	11	15	77	1	0	0	52	9	31	9	27	1	0	36	43	57	1	2	1
10014	PRJDB4176	DRR127532	0	0	0	21	0	13	0	5	2	0	30	14	3	14	21	0	21	2	1	2	44	0	1	7	2	0	1	1	47	90	72	4	2	2	8	7	12	4	116	9	0	2	3	66	0	37	0
10015	PRJDB4176	DRR127535	0	0	0	0	0	8	1	1	17	1	2	3	0	2	52	0	9	0	0	1	9	32	5	0	1	1	9	2	38	18	23	0	0	0	6	3	6	3	31	2	0	3	0	1	0	11	0
10016	PRJDB4176	DRR127536	0	1	0	0	0	64	0	2	3	0	35	1	0	0	18	20	50	14	0	2	4	11	2	37	7	0	0	12	25	3	22	11	4	0	10	0	48	0	45	13	0	0	6	10	0	20	1
10017	PRJDB4176	DRR127537	0	2	1	0	0	16	0	0	7	0	3	0	0	0	31	0	4	0	0	0	55	155	2	3	53	61	30	62	213	60	14	5	2	3	1	77	1	3	17	0	0	5	3	0	0	37	0
10018	PRJDB4176	DRR127546	0	0	0	3	0	80	0	16	3	4	21	49	3	13	65	24	22	63	3	3	5	6	584	8	15	1	76	25	14	10	35	6	18	3	37	68	14	45	53	23	0	9	100	1	0	8	0
10019	PRJDB4176	DRR127552	0	0	0	0	0	16	1	1	0	0	3	0	1	0	6	0	4	0	2	0	0	40	0	5	5	0	66	6	18	3	1	22	0	0	1	0	39	0	19	0	0	0	3	14	0	0	0
10020	PRJDB4176	DRR127557	0	0	0	0	0	32	22	2	0	1	25	21	2	1	34	2	3	9	1	0	3	2	10	1	1	11	6	7	7	18	16	8	0	1	8	3	11	0	20	0	0	5	16	0	415	0	2
10021	PRJDB4176	DRR127559	0	3	0	4	0	95	27	10	2	5	31	32	0	3	29	7	16	2	0	2	3	1	11	1	2	21	9	10	4	2	18	0	0	0	38	0	28	21	30	6	0	1	3	4	8	5	0
10022	PRJDB4176	DRR127567	0	0	1	0	0	1	0	0	1	0	337	0	3	11	10	0	0	0	0	0	5	0	14	0	0	296	10	0	1	362	0	0	1	0	6	0	3	0	2	0	0	0	0	15	0	5	1
10023	PRJDB4176	DRR127579	0	0	0	0	0	226	0	1	0	0	29	0	0	0	24	0	37	0	1	0	0	0	1	10	0	0	61	13	6	5	60	9	0	7	16	0	53	0	12	0	0	2	4	14	0	0	1
10024	PRJDB4176	DRR127580	16	0	0	16	0	99	17	12	10	0	17	16	6	3	28	1	3	13	10	0	22	12	13	6	11	20	2	16	9	4	60	19	0	3	27	5	37	35	65	2	1	6	33	15	0	8	3
10025	PRJDB4176	DRR127583	0	0	0	15	3	120	17	17	18	0	54	25	7	1	158	33	42	25	0	1	9	0	69	7	10	1	38	13	5	4	39	8	0	0	23	1	35	0	22	1	0	12	5	8	0	27	2
10026	PRJDB4176	DRR127588	0	0	0	0	0	10	35	0	2	5	7	0	0	0	0	0	79	26	0	0	9	6	42	12	3	0	40	0	43	48	5	8	0	0	0	0	61	1	87	0	0	0	41	71	0	12	0
10027	PRJDB4176	DRR127594	0	0	0	0	0	12	1	3	7	3	6	1	2	4	90	22	39	5	0	6	48	10	14	9	4	0	20	9	24	18	82	2	0	0	7	4	35	9	30	2	0	37	6	2	1	12	0
10028	PRJDB4176	DRR127596	0	0	0	0	0	7	30	2	8	0	6	0	1	3	44	1	8	0	2	0	19	6	10	18	2	0	10	12	4	1	63	11	2	1	5	0	11	0	18	0	0	2	0	11	0	9	0
10029	PRJDB4176	DRR127597	0	0	1	1	2	10	36	9	28	6	7	15	2	0	50	20	19	8	5	1	14	2	64	9	12	3	28	2	9	1	26	6	27	3	39	13	9	22	22	9	0	8	27	29	359	7	0
10030	PRJDB4176	DRR127646	1	0	0	0	1	78	31	13	15	19	29	16	0	5	99	18	129	11	23	3	27	19	29	2	8	33	30	17	34	26	185	12	86	2	56	21	79	0	44	3	1	8	317	126	3	17	0
10031	PRJDB4176	DRR127647	0	0	0	0	0	18	0	0	0	0	12	0	4	1	35	0	34	28	0	0	9	2	56	0	0	0	0	3	46	69	63	6	0	0	6	0	7	0	5	4	2	0	6	0	0	3	5
10032	PRJDB4176	DRR127649	0	3	0	0	1	48	44	23	3	5	8	34	2	2	54	10	35	1	14	0	29	8	22	9	0	41	37	13	32	5	32	11	0	1	59	19	14	8	29	34	0	34	21	18	0	4	0
10033	PRJDB4176	DRR127666	1	0	0	15	0	6	9	0	3	3	16	7	0	2	38	7	7	16	1	1	11	4	25	6	0	3	3	11	9	0	32	1	0	1	10	2	12	0	11	2	0	0	2	38	832	0	0
10034	PRJDB4176	DRR127669	0	2	0	4	2	0	2	2	0	1	4	23	7	2	32	0	32	6	0	0	36	6	21	0	1	13	1	9	21	11	36	12	0	0	27	2	51	10	28	0	0	11	9	3	0	15	2
10035	PRJDB4176	DRR127672	1	0	0	1	0	167	0	0	2	20	12	0	3	1	19	17	10	34	1	2	1	0	10	8	2	0	0	5	5	0	18	1	0	1	20	2	47	0	60	0	0	0	5	0	0	14	3
10036	PRJDB4176	DRR127674	0	1	0	0	0	111	19	2	0	1	38	18	10	3	11	1	61	38	0	3	31	7	15	7	16	0	19	53	6	2	13	1	2	0	36	30	30	1	32	0	4	5	28	7	0	0	2
10037	PRJDB4176	DRR127683	0	0	0	0	0	12	0	3	0	0	24	0	0	25	9	4	11	12	0	1	2	0	1	0	3	0	0	1	6	1	3	28	0	0	28	20	24	0	4	0	0	1	1	34	0	8	0
10038	PRJDB4176	DRR127685	0	0	0	0	0	0	5	1	12	3	3	11	12	2	24	6	12	4	3	3	26	2	42	11	1	7	19	9	31	0	24	4	0	0	17	0	22	15	43	5	0	5	2	6	0	5	1
10039	PRJDB4176	DRR127692	1	0	0	0	0	36	5	5	2	16	6	7	0	0	47	6	44	4	0	1	3	63	8	0	7	1	94	12	9	9	76	1	0	0	17	5	26	3	16	2	0	2	2	71	2	3	0
10040	PRJDB4176	DRR127700	1	2	0	2	4	15	1	17	2	8	15	57	0	11	63	8	47	24	10	0	64	11	12	21	4	9	36	12	153	14	12	5	0	15	77	22	12	1	40	1	0	16	90	14	5	9	0
10041	PRJDB4176	DRR127704	0	0	26	0	0	93	0	9	7	1	6	1	2	4	32	13	7	10	0	1	13	7	15	1	2	0	17	13	13	15	7	6	0	2	9	0	24	46	19	0	0	0	7	53	18	16	2
10042	PRJDB4176	DRR127707	7	0	0	12	0	29	0	1	25	0	10	0	5	25	129	0	116	0	1	3	39	3	23	25	7	0	5	17	48	29	182	18	1	1	45	10	73	4	103	14	0	3	16	3	0	0	0
10043	PRJDB4176	DRR127708	0	0	0	3	0	7	39	9	4	10	29	8	1	1	10	8	17	1	30	0	22	3	42	5	4	19	0	34	7	15	11	0	0	2	22	20	6	1	19	0	0	109	46	33	0	6	0
10044	PRJDB4176	DRR127713	0	0	0	0	0	22	2	1	2	0	7	0	0	0	38	0	12	0	0	2	22	14	28	14	0	0	0	0	4	5	92	36	0	3	7	1	41	0	75	0	0	0	6	19	0	0	3
10045	PRJDB4176	DRR127718	0	0	0	6	0	27	0	0	0	0	19	0	0	26	19	0	15	0	1	1	7	0	0	3	0	1	0	18	9	312	32	13	0	4	3	0	14	0	8	0	1	0	0	35	0	0	0
10046	PRJDB4176	DRR127720	0	0	0	3	0	127	4	39	4	3	16	38	0	4	82	18	24	0	13	1	40	2	42	7	24	19	4	34	54	35	29	5	0	0	72	8	51	0	38	0	0	34	22	10	16	21	0
10047	PRJDB4176	DRR127721	0	0	0	0	0	7	0	0	4	0	2	0	47	13	0	0	1	3	0	4	3	0	1	0	0	0	0	0	7	2	0	5	0	0	5	0	8	1	33	0	11	0	2	7	0	0	0
10048	PRJDB4176	DRR127724	0	0	0	0	0	249	7	3	6	0	19	5	0	1	46	0	13	1	0	17	11	0	0	32	4	0	0	16	6	12	56	20	0	0	8	0	31	0	40	0	2	2	2	9	0	4	2
10049	PRJDB4176	DRR127728	0	0	0	0	0	29	12	0	23	0	0	449	1	22	3	3	8	11	1	1	1	2	13	2	9	0	2	34	16	0	11	8	1	0	4	5	3	3	31	2	0	0	2	0	0	1	0
10050	PRJDB4176	DRR127731	0	0	0	0	0	65	1	0	56	0	27	1	1	95	148	0	32	0	1	4	16	29	9	7	0	11	80	9	39	9	20	30	0	1	17	21	38	2	92	2	1	1	1	88	1	1	0
10052	PRJDB4176	DRR127737	1	0	0	2	0	4	0	2	15	9	30	26	0	1	12	0	3	2	0	0	20	0	16	6	0	13	2	6	10	6	94	0	0	0	22	9	52	0	30	9	1	24	3	6	35	1	3
10053	PRJDB4176	DRR127748	0	0	0	0	0	49	2	0	3	0	0	1	13	2	1	60	0	0	0	0	11	21	79	62	0	3	0	2	44	0	0	6	0	0	0	0	150	0	39	0	0	17	2	4	0	1	0
10054	PRJDB4176	DRR127751	0	0	0	0	0	0	6	0	82	0	0	0	1	0	68	0	14	0	0	6	13	167	47	0	0	1	79	1	353	65	130	0	1	0	0	295	40	1	5	2	2	2	0	64	0	0	0
10055	PRJDB4176	DRR127752	0	0	0	0	0	269	1	0	0	0	1	0	5	5	1	0	1	1	0	1	25	3	1	0	0	1	353	0	0	3	0	1	0	0	0	0	3	23	16	12	2	0	0	1	0	1	0
10056	PRJDB4176	DRR127754	0	0	0	0	0	16	19	4	11	4	5	2	0	7	40	21	4	4	1	3	93	9	10	45	0	0	6	40	51	8	40	45	0	20	23	2	71	0	84	0	1	3	2	19	38	26	1
10057	PRJDB4176	DRR127755	0	0	0	0	0	6	1	0	47	0	3	1	5	1	38	0	1	0	0	1	7	19	27	12	0	0	87	0	17	10	77	13	0	0	47	18	61	40	63	15	1	3	1	36	0	4	0
10058	PRJDB4176	DRR127756	0	0	0	0	3	0	83	5	14	0	29	1	1	4	35	9	4	15	0	1	23	19	11	9	3	0	14	19	12	18	57	8	5	4	9	0	45	5	83	0	35	13	23	26	0	3	0
10059	PRJDB4176	DRR127762	0	0	0	11	0	68	8	4	70	0	9	3	0	4	44	7	5	14	0	3	7	3	9	6	1	3	154	3	7	4	55	0	0	1	7	3	15	36	8	5	0	1	27	292	306	3	0
10060	PRJDB4176	DRR127763	0	1	8	1	0	106	40	9	32	1	5	6	4	6	105	11	49	2	0	5	21	4	12	62	4	13	28	3	13	1	60	1	0	1	33	5	36	7	67	9	0	32	7	72	1	24	0
10061	PRJNA447983	SRR6915169	0	0	0	0	2	17	0	0	2	10	15	10	2	6	17	16	32	0	4	1	43	15	14	7	3	4	5	4	14	15	13	1	0	0	7	8	31	0	10	3	0	0	6	0	0	0	1
10062	PRJNA447983	SRR6915170	0	0	0	2	0	15	28	0	45	0	30	23	0	9	48	9	33	0	0	0	13	8	13	46	3	2	69	2	9	6	53	9	0	4	43	15	41	3	27	2	1	5	4	7	0	9	1
10063	PRJNA447983	SRR6915171	0	0	0	0	2	28	0	0	0	0	5	1	2	3	46	21	17	2	0	2	10	24	13	53	1	0	1	1	11	2	22	13	0	0	24	28	82	12	34	6	0	5	1	1	0	4	0
10064	PRJNA447983	SRR6915172	0	0	2	0	2	121	26	11	5	0	18	4	0	2	48	0	32	2	1	1	36	55	21	19	0	0	9	10	25	2	23	7	0	5	11	19	23	0	41	2	0	3	15	4	0	18	1
10065	PRJNA447983	SRR6915173	0	0	0	0	2	17	0	0	2	3	2	1	7	2	7	3	17	1	0	3	10	5	19	25	0	0	14	0	5	3	7	14	0	0	22	17	22	0	27	8	1	15	3	5	0	5	0
10066	PRJNA447983	SRR6915174	0	0	0	3	0	18	1	0	6	7	12	3	0	4	12	37	39	1	0	0	65	41	4	7	29	1	22	2	20	16	30	48	0	0	59	14	35	0	40	2	1	6	12	11	5	5	2
10067	PRJNA447983	SRR6915175	0	1	0	0	0	22	1	4	0	1	3	15	0	10	30	5	20	2	0	1	7	1	4	31	3	5	8	3	9	2	44	12	0	1	27	3	60	14	18	2	0	27	5	12	0	2	0
10068	PRJNA447983	SRR6915176	0	0	0	1	1	5	0	0	6	2	1	0	3	6	44	12	14	0	0	0	40	3	5	22	0	0	9	1	5	1	24	3	1	0	34	4	15	0	12	1	0	10	0	6	137	2	0
10069	PRJNA447983	SRR6915177	1	0	0	2	15	35	1	4	52	1	10	3	0	28	21	5	31	10	0	4	7	1	8	13	0	4	110	2	10	7	31	5	2	0	37	26	41	1	21	5	24	20	16	65	9	3	1
10070	PRJNA447983	SRR6915178	0	1	0	8	0	34	0	22	1	4	94	27	0	0	35	8	33	5	4	2	128	17	29	81	3	19	5	16	20	4	17	9	0	0	43	166	102	0	16	1	0	0	6	82	0	108	0
10071	PRJNA447983	SRR6915179	0	1	0	1	0	28	0	2	9	0	34	1	1	28	35	21	38	0	1	1	38	39	23	14	0	29	34	7	30	18	26	24	0	1	48	15	38	2	39	5	0	25	6	42	0	13	2
10072	PRJNA447983	SRR6915180	0	0	0	7	3	33	0	1	11	4	21	3	0	4	11	15	7	16	0	1	59	18	6	21	3	0	24	7	21	3	30	29	1	0	19	16	43	0	65	5	0	17	6	14	0	24	0
10073	PRJNA447983	SRR6915181	1	0	0	0	13	9	31	8	4	6	11	6	1	9	28	10	62	11	7	4	24	0	4	13	2	2	24	1	18	19	31	5	0	2	34	23	42	3	31	3	2	38	43	37	2	4	0
10074	PRJNA447983	SRR6915182	0	0	41	0	2	67	2	8	2	5	9	13	0	6	13	25	8	3	8	1	37	13	35	6	8	9	7	41	84	6	11	1	0	4	31	37	5	0	48	0	0	1	281	13	0	37	1
10075	PRJNA447983	SRR6915183	0	0	0	8	1	2	1	5	3	34	24	8	0	1	46	15	26	4	11	1	39	22	26	37	1	36	4	28	3	6	26	11	1	6	22	4	56	11	43	6	0	1	55	26	3	23	0
10076	PRJNA447983	SRR6915184	0	0	0	1	0	10	1	4	8	0	5	5	2	3	40	20	53	0	2	0	7	0	4	29	5	0	0	6	5	16	55	14	0	0	21	5	59	3	33	7	0	22	3	3	0	3	0
10077	PRJNA447983	SRR6915185	0	0	0	2	14	4	1	1	6	0	3	11	2	8	21	20	61	3	11	2	15	14	7	37	3	6	23	7	7	7	80	23	0	5	59	6	68	1	49	7	0	4	19	5	0	3	0
10078	PRJNA447983	SRR6915186	0	0	0	0	0	6	1	1	17	4	7	0	0	4	0	3	0	3	0	0	154	37	8	57	9	4	15	4	10	3	36	6	0	0	26	50	74	0	48	13	0	26	7	1	1	81	0
10079	PRJNA447983	SRR6915187	1	0	0	3	0	27	1	1	7	1	4	8	2	3	6	3	44	1	1	0	5	3	43	10	2	2	8	3	7	2	31	7	0	1	43	2	21	3	21	1	0	2	2	15	0	4	0
10080	PRJNA447983	SRR6915188	0	0	0	0	0	25	6	0	10	1	15	28	0	0	48	0	25	4	3	0	63	16	8	2	5	2	0	4	6	2	18	15	4	7	38	4	14	43	27	3	0	8	13	3	0	6	1
10081	PRJNA447983	SRR6915189	0	0	0	0	0	11	0	15	48	0	15	16	92	1	123	7	127	6	0	0	132	37	12	16	46	78	4	125	16	5	120	47	0	0	133	53	23	7	143	49	45	12	3	8	3	9	0
10082	PRJNA447983	SRR6915190	1	2	0	6	0	228	4	47	10	14	48	18	20	0	177	14	148	2	14	0	94	17	78	3	4	19	2	101	21	9	144	44	0	9	153	19	40	0	57	10	0	16	289	48	1	38	3
10083	PRJEB10878	ERR1018185	0	7	2	0	3	6	20	5	4	14	20	29	15	10	36	26	36	4	43	1	59	14	31	6	39	26	32	25	47	30	25	7	14	3	71	26	41	0	54	4	0	3	66	37	4	23	0
10084	PRJEB10878	ERR1018186	0	0	4	1	0	63	173	4	37	1	24	21	16	6	105	11	14	4	0	2	2	1	15	4	12	61	57	4	4	5	38	1	1	0	64	1	13	25	27	7	0	3	26	26	0	1	0
10086	PRJEB10878	ERR1018188	0	0	0	2	0	41	11	16	8	1	8	1	9	7	48	14	12	14	6	1	29	19	48	0	23	1	19	3	72	26	25	15	0	4	20	1	69	1	54	1	0	35	17	16	0	23	0
10087	PRJEB10878	ERR1018189	0	0	1	3	0	32	9	1	60	28	5	9	11	6	31	0	24	22	5	5	21	5	9	10	4	47	107	5	22	12	16	13	0	1	45	71	8	0	9	4	2	5	246	304	2	19	0
10088	PRJEB10878	ERR1018190	0	0	0	0	0	2	1	1	0	0	2	8	1	1	11	3	214	2	0	4	28	0	8	1	12	0	0	12	5	1	7	8	0	1	5	4	8	0	21	0	0	4	5	8	1	0	0
10089	PRJEB10878	ERR1018191	0	0	0	5	0	8	0	2	3	0	13	15	10	5	0	10	73	7	1	1	72	0	60	19	14	0	6	30	119	3	0	4	0	1	90	3	13	1	82	3	20	0	321	7	1	39	1
10090	PRJEB10878	ERR1018192	0	0	0	0	24	124	0	0	1	0	23	7	2	3	0	240	16	10	0	0	4	0	0	0	1	0	2	6	122	2	8	3	0	1	14	0	12	1	50	0	0	9	3	2	1	0	0
10091	PRJDB4176	DRR127767	0	1	0	8	8	29	2	18	6	5	23	45	2	10	33	36	73	6	20	2	110	15	75	0	27	27	17	13	60	3	32	48	0	4	59	150	13	0	94	0	1	15	498	29	5	36	2
10092	PRJDB4176	DRR127774	0	0	0	7	3	8	10	5	5	0	3	12	6	10	82	2	9	4	1	0	26	0	20	20	9	5	2	5	18	11	15	6	1	0	9	7	35	28	59	9	0	12	2	8	0	2	1
10093	PRJDB4176	DRR127776	2	0	0	0	0	52	5	0	1	0	2	0	0	0	94	0	36	5	0	2	3	331	18	66	0	0	91	0	3	26	151	2	1	3	19	0	186	0	38	0	0	1	0	8	4	0	0
10094	PRJDB4176	DRR127777	1	0	0	0	1	15	16	4	56	1	1	8	2	2	67	10	63	5	0	1	55	22	15	48	0	5	95	2	58	2	28	64	1	0	19	4	56	1	130	5	1	12	3	82	45	36	0
10095	PRJDB4176	DRR127789	1	0	0	28	1	159	35	55	11	15	4	43	0	1	16	13	20	9	65	5	53	10	36	18	9	1	0	60	56	49	23	2	0	23	42	30	24	2	58	0	0	42	51	141	9	51	13
10096	PRJDB4176	DRR162775	0	0	0	0	0	152	0	0	42	1	1	1	1	42	3	0	11	9	0	1	6	1	2	0	0	0	196	2	10	9	3	11	0	1	0	2	5	5	5	0	1	0	1	30	5	4	0
10097	PRJDB4176	DRR162776	0	0	0	0	12	38	0	0	0	0	1	0	0	2	0	0	3	16	0	2	17	0	1	0	11	0	0	0	22	0	13	28	0	0	1	0	25	1	15	0	5	0	0	49	0	9	0
10098	PRJDB4176	DRR162777	0	0	0	0	0	52	0	2	61	0	8	1	0	13	64	31	3	0	1	0	20	35	0	26	6	0	19	0	75	1	91	45	2	1	7	6	91	0	75	0	16	0	0	24	13	18	0
10099	PRJDB4176	DRR162778	1	0	1	3	0	76	47	12	54	3	27	2	39	4	140	8	55	12	7	5	40	8	70	22	16	4	43	15	33	30	40	7	0	0	82	29	57	10	78	16	0	10	26	54	33	27	6
20010	PRJEB27928	ERR2726406	0	0	0	2	1	12	6	8	16	64	20	16	7	0	57	0	42	2	28	0	17	27	33	16	1	17	8	9	11	14	50	4	0	0	100	10	13	15	45	2	0	1	26	78	0	21	1
20011	PRJEB27928	ERR2726407	0	0	0	1	2	56	3	1	57	0	18	4	29	22	132	23	11	2	2	4	26	90	33	9	1	1	47	8	53	0	42	25	1	0	39	5	34	25	73	35	0	10	0	11	0	17	2
20012	PRJEB27928	ERR2726408	0	0	4	4	6	31	16	12	14	1	3	19	1	4	98	30	12	0	13	4	33	4	26	7	20	16	42	9	28	13	52	21	0	2	91	9	44	9	57	2	0	21	67	65	0	12	0
20013	PRJEB27928	ERR2726409	0	0	0	0	5	129	4	2	27	0	4	2	6	15	40	2	26	1	4	27	2	14	37	14	6	1	41	5	7	4	32	0	0	1	40	13	27	3	51	5	0	12	2	39	4	1	0
20014	PRJEB27928	ERR2726410	0	0	0	0	1	107	0	2	0	0	2	5	2	0	42	3	30	2	1	0	0	1	14	14	2	1	1	5	2	6	35	2	0	0	113	2	40	0	109	0	0	10	0	2	1	1	0
20015	PRJEB27928	ERR2726411	0	0	0	2	0	18	5	2	1	0	2	1	2	29	5	1	5	5	0	0	25	0	10	1	3	12	31	10	3	0	23	0	0	0	28	3	7	0	5	4	3	11	12	1	2	2	0
20016	PRJEB27928	ERR2726412	0	0	0	2	0	23	12	1	0	1	0	2	2	20	7	2	6	3	0	0	21	0	6	1	3	9	24	14	4	5	13	0	0	0	21	8	6	1	9	4	2	10	5	1	0	5	0
20017	PRJEB27928	ERR2726413	0	0	0	1	0	23	9	3	0	0	2	1	2	18	8	0	5	1	0	0	31	0	9	1	5	14	31	10	4	5	20	0	0	1	15	7	8	0	9	3	1	7	7	0	1	11	0
20018	PRJEB27928	ERR2726414	0	0	0	2	0	24	7	3	1	0	2	4	2	25	1	1	3	0	0	0	17	0	10	2	1	11	35	12	3	1	19	2	0	0	18	4	3	1	17	4	1	8	9	0	0	7	0
20019	PRJEB27928	ERR2726415	0	0	0	10	2	6	0	18	0	3	1	0	1	0	36	17	16	18	6	0	11	0	42	14	7	11	1	25	6	17	9	4	9	28	9	18	10	0	31	0	0	22	159	37	24	10	0
20020	PRJEB27928	ERR2726416	0	0	0	10	0	2	2	17	0	5	0	3	0	1	17	13	10	24	4	1	11	0	44	14	6	5	5	22	7	32	16	10	8	24	13	11	7	0	28	3	0	34	161	30	24	4	0
20021	PRJEB27928	ERR2726417	1	0	0	14	1	1	2	20	0	2	0	1	0	1	38	13	13	23	7	0	6	0	35	11	7	3	5	27	6	15	19	8	8	20	12	11	12	1	33	0	0	22	151	24	24	13	0
20022	PRJEB27928	ERR2726418	0	0	0	14	2	3	3	16	0	2	1	2	1	1	36	10	17	23	2	0	16	3	34	16	4	6	6	35	10	18	12	11	7	24	4	11	21	0	24	1	0	27	140	37	19	10	1
20023	PRJEB27928	ERR2726419	0	0	0	2	2	5	11	9	12	23	25	26	6	0	108	54	127	9	9	6	45	16	21	8	12	24	4	6	39	26	96	3	3	0	108	66	71	0	40	1	0	12	34	24	0	82	1
20024	PRJEB27928	ERR2726420	0	0	0	0	2	15	22	3	75	20	6	4	9	8	21	13	15	9	13	0	6	0	14	6	1	4	36	0	16	7	16	2	6	1	22	8	16	1	12	4	2	16	20	15	1	9	0
20025	PRJEB27928	ERR2726421	5	2	8	5	6	66	24	9	12	1	24	17	6	1	42	22	34	1	5	5	38	20	50	18	3	13	25	9	1	96	26	22	0	0	72	10	16	5	62	21	0	5	9	10	1	14	0
20026	PRJEB27928	ERR2726422	0	0	0	0	0	31	1	0	26	1	6	21	2	11	40	1	15	17	3	0	14	25	14	7	6	4	3	13	2	0	7	12	22	0	26	87	53	2	11	1	0	10	9	3	1	6	1
20027	PRJEB27928	ERR2726423	4	0	0	0	2	19	5	4	7	85	7	10	1	3	10	18	19	0	7	2	21	4	5	12	49	2	3	25	19	7	37	10	0	0	5	13	23	0	14	2	0	8	157	24	0	5	1
20028	PRJEB27928	ERR2726424	3	0	0	0	2	22	8	5	3	103	13	6	1	1	10	15	10	2	5	3	17	2	5	5	41	2	6	25	15	5	31	9	0	0	11	20	16	2	12	3	0	11	165	23	1	4	0
20029	PRJEB27928	ERR2726425	0	0	0	1	1	25	10	4	8	73	6	4	2	2	10	12	17	2	7	1	24	3	2	7	53	2	9	20	16	9	21	4	1	2	15	17	23	0	13	5	0	4	145	27	1	0	0
20030	PRJEB27928	ERR2726426	1	0	0	1	5	21	7	5	5	87	8	12	1	3	7	14	11	2	6	0	16	2	4	7	41	1	5	13	11	8	26	3	1	1	11	17	18	1	12	2	0	5	156	16	3	1	0
20031	PRJEB27928	ERR2726427	0	2	0	2	0	27	4	16	53	0	8	4	8	6	69	37	92	2	5	3	39	18	11	8	5	1	24	2	173	48	26	29	1	6	40	47	38	0	48	0	0	2	481	15	0	4	0
20032	PRJEB27928	ERR2726428	0	0	1	0	0	0	6	0	7	0	2	2	12	15	37	6	15	0	0	0	18	3	30	4	0	0	20	1	24	3	21	1	0	0	15	2	25	11	7	7	0	11	5	7	0	4	0
20033	PRJEB27928	ERR2726429	0	0	4	1	1	19	10	7	4	2	17	25	3	4	41	8	47	9	20	0	26	7	54	15	14	4	15	24	8	7	43	3	0	1	63	22	19	1	45	0	0	20	140	19	0	4	2
20034	PRJEB27928	ERR2726430	1	0	30	1	0	9	18	13	2	1	13	9	3	5	36	7	5	0	5	2	25	17	12	3	5	6	20	10	5	7	13	1	0	0	33	16	27	2	76	3	9	6	20	6	193	2	2
20035	PRJEB27928	ERR2726431	13	1	0	0	3	4	210	5	2	7	8	9	4	2	22	4	14	12	7	1	64	0	48	14	7	8	10	15	2	18	19	46	0	5	30	5	14	0	45	0	0	26	10	65	34	3	0
20036	PRJEB27928	ERR2726432	0	0	0	0	2	3	16	6	11	3	13	28	3	1	78	9	24	1	3	0	54	10	36	89	7	11	6	18	54	5	32	8	4	48	46	79	39	5	38	12	1	35	42	12	59	45	0
20037	PRJEB27928	ERR2726433	0	0	3	2	2	5	13	10	10	13	12	23	3	2	33	15	17	8	33	6	36	15	31	6	8	15	9	7	9	5	46	9	2	8	25	28	11	0	30	7	0	2	78	19	0	9	1
20038	PRJEB27928	ERR2726434	0	1	0	0	2	69	7	4	4	0	5	8	11	0	47	19	45	11	6	3	2	3	28	44	7	2	19	8	11	0	41	10	1	1	16	48	63	0	69	5	0	5	9	1	0	3	0
20039	PRJEB27928	ERR2726435	0	0	3	5	2	44	4	5	129	5	93	28	4	3	174	9	166	0	6	2	7	1	61	34	3	5	9	12	5	16	211	8	2	2	116	23	91	2	64	6	2	3	3	4	0	25	4
20040	PRJEB27928	ERR2726436	0	1	0	2	1	10	31	5	18	96	4	30	1	2	268	56	80	6	3	3	25	12	93	58	5	30	9	18	14	23	167	34	0	1	83	38	267	17	19	2	0	10	10	133	0	11	5
20041	PRJEB27928	ERR2726437	0	0	8	1	0	6	6	1	27	6	7	9	0	2	8	3	24	2	12	4	6	9	31	6	0	5	33	3	6	6	36	20	15	5	25	6	27	2	50	1	0	6	104	62	2	4	0
20042	PRJEB27928	ERR2726438	0	0	4	0	0	5	10	3	18	9	5	2	3	3	12	5	38	4	7	2	9	6	36	8	1	5	33	10	11	7	48	12	10	1	25	6	19	2	41	7	0	9	100	45	0	4	0
20043	PRJEB27928	ERR2726439	0	0	12	2	3	4	11	5	24	10	7	5	0	3	22	2	28	2	13	5	5	10	33	9	1	3	29	6	10	5	39	17	8	0	27	5	23	0	53	1	0	18	91	43	1	5	0
20044	PRJEB27928	ERR2726440	2	0	7	1	2	3	7	2	15	2	6	3	2	6	11	3	35	3	14	3	5	4	39	5	2	9	30	3	10	4	30	16	13	2	19	7	12	0	52	3	0	7	109	45	1	1	0
20045	PRJEB27928	ERR2726441	0	0	0	9	1	113	0	0	71	1	31	1	45	4	53	4	17	7	3	1	6	53	2	7	0	0	60	8	1	1	17	25	0	1	25	26	23	15	52	2	0	8	19	30	0	4	0
20046	PRJEB27928	ERR2726442	1	0	3	0	1	115	0	4	24	1	2	13	21	21	124	13	16	0	1	0	9	1	33	60	7	19	53	35	1	11	64	16	0	0	24	45	66	0	73	17	0	50	0	5	8	11	1
20047	PRJEB27928	ERR2726443	7	0	0	0	5	66	7	1	6	11	9	4	0	3	57	1	33	2	11	4	8	8	22	16	0	9	17	2	1	5	31	11	0	1	23	11	15	14	14	10	0	9	42	0	0	2	1
20048	PRJEB27928	ERR2726444	3	0	3	3	1	27	46	2	12	0	7	4	13	7	58	11	50	4	15	2	9	16	15	30	20	4	40	6	4	6	114	9	0	1	18	13	30	2	28	1	0	8	18	23	0	14	1
20049	PRJEB27928	ERR2726453	0	0	4	0	4	7	0	0	10	0	1	5	0	3	34	4	17	9	1	0	8	3	6	9	2	0	4	9	7	3	26	0	0	1	12	1	2	0	21	0	0	12	0	0	0	0	0
20050	PRJEB27928	ERR2726454	0	0	3	0	3	5	0	0	7	0	1	3	1	6	36	0	15	7	1	1	12	3	6	11	1	0	6	7	10	1	20	0	0	0	17	2	3	1	12	0	0	20	2	2	0	0	0
20051	PRJEB27928	ERR2726455	0	0	5	0	5	3	0	1	7	0	1	3	2	0	30	1	20	6	0	1	4	1	5	7	1	0	6	10	2	1	23	0	0	0	15	2	3	2	13	2	0	12	0	1	0	0	0
20052	PRJEB27928	ERR2726456	0	0	3	0	0	4	1	2	4	0	1	2	0	4	28	4	20	5	0	4	10	5	2	3	1	0	3	13	8	1	26	0	0	1	11	1	3	0	19	0	0	12	1	1	0	1	0
20053	PRJEB27928	ERR2726457	0	0	0	0	2	30	0	1	13	0	0	1	6	1	30	1	25	0	1	1	5	21	20	1	3	1	4	11	2	1	33	4	32	0	20	2	26	7	10	3	0	0	3	4	2	3	0
20054	PRJEB27928	ERR2726458	0	0	0	0	0	10	13	14	3	2	45	5	8	1	172	4	97	9	6	1	24	7	129	28	0	7	6	4	9	16	133	0	0	0	53	8	88	1	29	6	0	16	2	0	295	54	1
20055	PRJEB27928	ERR2726459	0	0	0	1	13	7	7	14	23	13	20	42	9	2	43	6	211	15	27	4	163	7	40	92	2	28	11	21	12	10	101	10	0	1	114	18	84	1	29	0	0	11	59	30	13	21	0
20056	PRJEB27928	ERR2726460	1	0	4	3	2	1	4	6	16	11	7	25	3	1	65	6	188	4	14	1	63	7	41	5	10	18	2	0	109	44	94	1	2	1	285	82	123	0	10	1	0	4	9	161	0	16	0
20057	PRJEB27928	ERR2726461	0	1	0	0	1	22	2	18	7	9	17	10	2	8	155	13	123	4	12	0	66	0	12	12	11	22	5	119	25	5	54	47	4	1	156	9	37	15	57	0	0	11	16	20	0	5	4
20058	PRJEB27928	ERR2726462	0	1	2	1	1	47	9	12	15	2	6	18	3	30	31	11	46	1	13	4	33	26	14	17	14	15	9	19	34	9	23	3	0	2	76	54	40	11	55	2	0	28	53	4	0	0	0
20059	PRJEB27928	ERR2726463	0	0	0	1	0	60	25	0	4	1	9	8	1	9	13	3	15	1	0	0	7	1	27	4	3	0	0	5	8	3	18	5	3	0	26	0	3	4	42	0	0	0	1	9	0	6	1
20060	PRJEB27928	ERR2726464	0	0	0	0	0	67	31	2	3	1	7	8	1	6	21	1	18	0	1	0	11	3	22	8	1	0	1	2	7	2	23	8	5	0	28	0	13	0	42	0	0	0	4	8	0	3	0
20061	PRJEB27928	ERR2726465	0	0	0	0	0	76	32	2	3	1	11	10	0	5	24	3	15	1	1	0	10	0	19	8	1	0	0	5	6	0	20	5	3	0	20	1	11	8	31	0	0	0	4	11	0	11	0
20062	PRJEB27928	ERR2726466	0	0	0	0	1	68	23	1	6	0	10	8	0	10	16	5	7	1	0	1	13	3	9	3	0	0	0	3	7	3	21	6	5	1	19	0	17	3	28	0	0	0	4	13	0	10	0
20063	PRJEB27928	ERR2726467	0	1	0	0	7	22	8	8	5	5	3	6	8	6	39	7	36	10	9	1	17	5	15	1	0	4	13	8	5	2	29	7	0	2	47	3	16	1	49	5	0	3	45	52	0	5	0
20064	PRJEB27928	ERR2726468	0	0	0	0	6	23	12	6	2	8	1	5	10	0	35	5	28	8	4	2	16	9	18	2	0	11	14	6	6	3	44	4	0	3	42	4	20	0	34	4	0	7	41	42	1	10	0
20065	PRJEB27928	ERR2726469	0	0	0	0	3	20	4	18	5	3	2	8	8	3	44	15	33	6	7	0	18	8	11	0	1	8	12	2	5	1	33	5	1	1	52	3	15	2	42	6	0	1	40	41	0	2	0
20066	PRJEB27928	ERR2726470	0	0	0	0	4	23	10	15	1	6	3	6	2	2	31	9	37	7	5	2	17	7	14	0	3	6	14	4	1	4	33	10	0	2	47	7	18	2	37	8	0	0	50	40	1	0	1
20067	PRJEB27928	ERR2726471	0	2	0	1	2	84	9	3	21	0	7	33	4	7	142	9	29	0	2	0	43	21	42	32	9	23	27	14	18	3	37	11	1	6	137	12	21	7	52	14	0	11	19	14	0	15	0
20068	PRJEB27928	ERR2726472	0	6	20	0	1	8	0	3	68	24	2	3	9	1	47	8	74	7	2	1	4	20	68	24	4	11	84	2	31	25	59	4	5	2	39	9	56	3	82	1	2	5	21	31	10	16	0
20069	PRJEB27928	ERR2726473	0	0	0	6	0	32	47	1	1	0	6	16	7	2	75	27	40	5	2	4	16	2	53	10	3	2	15	4	5	3	27	2	0	0	32	4	18	23	43	18	0	3	8	31	0	0	0
20070	PRJEB27928	ERR2726474	0	0	0	0	7	114	5	5	52	6	6	9	10	7	76	23	38	0	23	0	48	29	65	13	0	7	19	9	33	6	71	14	0	0	93	17	39	1	43	3	0	5	73	12	0	21	1
20071	PRJEB27928	ERR2726475	1	2	0	0	0	19	26	3	7	5	16	6	4	3	40	4	33	0	2	0	12	13	31	29	17	0	7	19	23	0	55	10	1	2	51	26	21	19	25	0	0	8	4	0	0	9	0
20072	PRJEB27928	ERR2726476	0	0	0	0	0	26	1	0	28	1	4	4	0	6	46	9	23	1	0	0	38	17	6	26	1	0	24	7	13	5	42	3	0	1	27	9	17	6	24	3	0	13	0	2	0	13	0
20073	PRJEB27928	ERR2726477	1	0	0	0	0	12	0	2	19	0	0	3	1	4	25	7	14	0	0	1	45	18	3	37	3	3	11	4	10	5	38	2	0	1	24	15	19	5	16	5	0	6	1	1	0	11	1
20074	PRJEB27928	ERR2726478	0	0	0	0	0	20	1	0	15	0	0	1	2	4	41	11	10	2	1	1	37	20	7	30	1	3	21	2	12	6	36	1	1	2	20	15	12	7	25	3	0	7	1	2	1	5	0
20075	PRJEB27928	ERR2726479	0	0	0	0	0	17	1	2	22	1	1	1	2	3	36	7	17	0	0	0	26	18	9	37	2	1	21	2	13	6	32	1	0	0	25	9	19	3	17	5	0	11	0	1	1	19	0
20076	PRJEB27928	ERR2726480	0	0	0	0	1	3	4	7	2	21	15	27	2	0	34	4	6	11	13	0	9	1	21	1	1	0	1	19	24	22	14	16	0	0	59	69	27	0	10	0	0	1	54	14	1	15	0
20077	PRJEB27928	ERR2726481	1	1	0	0	1	4	1	8	1	29	15	22	0	4	42	13	2	1	11	2	8	2	24	2	1	0	2	8	22	18	19	8	0	0	62	61	29	1	19	2	0	4	56	17	0	5	0
20078	PRJEB27928	ERR2726482	1	0	0	1	0	8	3	4	0	19	15	16	4	1	40	14	8	3	8	0	8	2	19	2	4	0	3	9	23	26	18	8	0	2	70	62	30	2	15	1	0	4	55	9	2	6	1
20079	PRJEB27928	ERR2726483	0	0	0	0	0	2	2	8	0	36	15	33	5	1	36	10	10	2	18	0	9	1	13	3	2	0	3	13	27	16	16	6	0	2	48	59	30	1	6	0	0	1	47	20	0	7	1
20080	PRJEB27928	ERR2726484	0	0	0	2	0	13	1	4	4	1	25	11	0	0	10	14	21	0	3	3	61	6	17	3	1	0	8	69	61	18	10	14	0	4	19	1	19	2	19	3	0	11	71	8	0	33	0
20081	PRJEB27928	ERR2726485	0	0	0	1	5	39	2	9	18	36	1	7	1	10	48	11	20	5	11	1	73	17	12	3	3	18	18	67	48	5	101	24	2	3	67	16	38	3	92	5	0	10	31	51	0	3	1
20082	PRJEB27928	ERR2726486	1	1	0	0	21	16	101	19	28	44	14	20	15	9	49	5	38	11	79	9	36	5	57	37	18	58	20	53	19	34	67	29	0	1	38	10	66	3	43	1	0	32	76	47	32	21	0
20083	PRJEB27928	ERR2726487	0	0	0	0	3	69	6	2	0	0	0	9	0	0	26	4	2	0	3	1	4	0	13	15	2	0	4	4	12	0	14	1	0	0	52	8	11	3	24	2	0	0	3	9	61	4	0
20084	PRJEB27928	ERR2726488	0	0	0	0	5	60	68	1	0	3	2	13	3	10	35	1	82	3	0	2	4	9	15	2	4	10	1	5	6	1	87	6	6	2	34	8	26	0	40	5	0	2	33	6	3	1	1
20085	PRJEB27928	ERR2726489	0	0	0	0	0	0	6	0	3	0	2	12	2	3	14	7	27	0	2	0	2	5	2	2	12	3	13	4	4	1	5	1	0	1	29	2	3	0	31	1	0	3	7	1	0	4	0
20086	PRJEB27928	ERR2726490	0	0	0	2	0	0	4	1	2	0	4	9	4	8	10	7	34	1	2	0	5	5	1	2	11	3	18	2	7	0	4	0	0	0	24	1	7	1	32	0	0	4	4	4	0	7	2
20087	PRJEB27928	ERR2726491	0	0	0	0	0	0	1	1	3	1	4	10	3	10	10	3	38	1	0	0	2	5	1	4	14	3	17	2	6	0	6	0	0	0	26	2	3	2	27	1	0	4	3	0	0	1	0
20088	PRJEB27928	ERR2726492	0	0	0	2	1	0	5	4	1	0	4	10	0	10	11	2	46	0	1	0	5	3	1	4	8	4	10	1	11	0	6	0	0	2	29	5	3	0	18	4	0	2	3	2	0	1	0
100100	PRJEB7774	ERR688505	1	0	0	0	1	4	2	1	3	0	3	0	57	4	55	1	6	0	0	2	30	13	8	60	3	2	22	3	12	6	8	7	0	0	76	52	65	1	76	17	0	26	1	0	2	12	0
100101	PRJEB7774	ERR688506	11	0	12	1	5	18	14	17	8	4	4	7	290	32	10	32	21	2	9	6	53	38	9	24	32	2	29	3	34	3	90	52	0	0	128	6	21	1	147	24	0	28	14	5	2	44	0
100102	PRJEB7774	ERR688507	0	2	0	3	9	8	19	0	11	2	9	0	217	22	65	49	76	2	10	3	31	38	17	57	63	7	14	2	55	4	119	10	0	1	135	20	70	6	156	7	0	6	14	2	1	1	0
100103	PRJEB7774	ERR688509	0	0	4	3	2	2	1	5	10	1	10	1	291	9	108	26	19	0	5	0	75	32	6	79	11	4	16	1	48	7	50	34	0	0	65	111	89	4	180	35	27	24	3	2	1	50	0
100104	PRJEB7774	ERR688510	1	0	0	0	0	12	17	1	1	6	4	0	237	0	7	1	1	0	1	7	200	0	5	80	0	0	2	4	63	1	1	0	0	0	28	23	81	0	3	2	1	21	4	3	0	104	1
100105	PRJEB7774	ERR688511	0	0	0	0	0	0	0	0	0	0	4	0	179	35	36	29	13	1	7	22	12	1	3	178	1	2	7	0	16	0	43	9	1	0	28	83	154	0	54	3	0	62	2	1	0	148	0
100107	PRJEB7774	ERR688514	12	1	11	4	4	7	17	31	0	4	6	8	179	3	56	51	11	3	16	2	14	6	17	50	19	15	12	2	35	8	39	30	0	4	110	15	128	1	114	17	0	120	41	21	4	10	1
100108	PRJEB7774	ERR688515	1	0	0	5	1	13	51	36	113	3	75	19	24	30	47	31	26	5	28	2	140	7	106	52	20	17	14	6	14	7	25	41	3	11	76	24	16	3	78	1	0	36	78	18	5	67	0
100109	PRJEB7774	ERR688516	2	0	3	1	0	7	32	5	3	1	1	8	167	16	40	10	30	4	10	5	31	9	110	41	11	7	10	2	15	2	60	17	3	1	109	67	47	2	79	1	1	8	15	17	2	7	1
100110	PRJEB7774	ERR688517	0	0	0	2	1	5	0	79	18	1	14	7	106	2	37	14	11	30	14	0	75	9	62	8	50	10	13	22	39	20	49	6	0	43	40	28	40	0	75	4	3	114	251	102	11	4	1
100111	PRJEB7774	ERR688520	0	0	0	0	2	2	2	7	4	1	2	2	198	19	73	17	53	17	7	4	108	50	18	44	1	9	22	4	39	5	172	23	0	0	170	29	44	0	180	2	0	4	8	18	0	27	0
100112	PRJEB7774	ERR688521	0	0	0	0	0	0	0	0	3	7	6	1	50	19	22	97	32	0	4	0	86	21	11	65	0	3	1	2	44	25	54	12	1	0	28	37	86	8	119	0	0	103	4	0	3	61	0
100113	PRJEB7774	ERR688523	4	0	0	2	6	7	7	4	1	2	7	11	264	4	45	61	35	5	8	5	54	15	36	33	3	12	20	1	55	16	82	29	0	6	68	16	65	0	89	4	0	36	20	14	1	5	0
100114	PRJEB7774	ERR688525	0	0	11	1	3	7	21	3	6	3	43	7	48	28	25	34	52	2	3	1	124	1	55	49	2	8	41	3	11	20	48	13	0	2	20	11	65	0	68	5	1	17	90	19	11	20	0
100115	PRJEB7774	ERR688527	3	0	5	7	3	54	47	7	16	4	2	18	55	5	44	15	188	3	34	6	47	13	63	19	16	11	10	15	45	19	24	27	0	4	64	28	29	1	67	2	0	13	143	27	1	30	1
100116	PRJEB7774	ERR688528	15	1	4	1	1	10	2	9	13	11	4	19	259	9	46	22	35	44	3	1	42	20	31	69	10	17	3	4	85	4	44	14	63	15	72	36	43	1	49	1	1	66	29	5	1	13	7
100117	PRJEB7774	ERR688529	0	0	20	1	7	6	33	7	2	31	1	10	294	2	67	21	36	4	65	3	165	2	8	22	2	28	13	9	151	9	12	79	21	6	191	23	22	0	90	9	0	34	29	102	0	45	1
100118	PRJEB7774	ERR688530	2	0	0	12	6	5	39	0	16	0	3	1	259	62	31	19	26	0	1	2	16	78	1	37	17	30	5	0	62	24	94	59	0	0	183	8	68	7	160	0	0	20	10	2	0	57	0
100119	PRJEB7774	ERR688532	1	0	0	1	0	20	0	0	0	0	28	60	111	46	4	33	15	1	0	0	1	370	2	16	6	0	0	52	8	18	31	9	0	1	51	102	45	0	18	0	0	6	1	0	0	0	0
100120	PRJEB7774	ERR688563	1	0	0	0	0	4	14	0	1	0	12	8	383	5	16	3	5	0	2	4	4	13	1	14	1	20	0	8	22	4	14	5	0	0	22	1	23	0	47	26	0	59	14	3	1	20	0
100121	PRJEB10878	ERR1018193	0	0	0	4	0	54	11	0	17	0	11	5	6	1	4	4	2	0	0	3	2	0	10	3	3	3	60	3	4	46	3	1	0	4	6	1	9	38	8	2	0	0	2	20	2	2	0
100122	PRJEB10878	ERR1018194	0	0	4	1	0	45	16	3	1	0	108	8	6	1	64	0	29	23	0	1	21	2	4	0	5	34	13	10	17	0	14	1	1	1	17	0	8	6	19	0	2	2	10	0	0	4	0
100123	PRJEB10878	ERR1018195	0	0	0	0	0	90	0	1	29	1	56	0	7	1	33	0	14	1	0	1	4	5	9	0	10	20	47	5	56	6	48	6	0	16	41	11	28	8	19	2	0	1	0	26	0	1	0
100124	PRJEB10878	ERR1018196	0	0	0	1	0	62	8	3	0	5	38	41	7	1	67	9	19	3	9	3	66	9	25	20	6	54	15	4	7	6	34	13	1	1	52	13	12	11	21	0	0	5	42	11	43	3	0
100125	PRJEB10878	ERR1018197	36	0	41	0	0	25	2	8	94	0	1	12	7	2	64	8	65	3	5	1	20	3	93	2	4	3	110	6	13	22	8	1	0	1	100	2	9	0	13	4	21	1	7	315	1	5	0
100126	PRJEB10878	ERR1018198	0	0	0	0	0	6	0	1	5	13	87	1	34	11	97	2	36	29	8	3	11	21	47	0	4	7	9	20	8	4	68	8	0	28	83	11	14	0	72	2	1	6	137	9	0	16	4
100127	PRJEB10878	ERR1018199	0	0	0	0	0	6	1	0	0	1	11	0	83	1	0	1	2	29	0	0	3	5	0	0	2	0	0	1	2	0	1	24	0	3	6	3	8	1	87	1	0	1	5	21	0	1	0
100128	PRJEB10878	ERR1018200	0	1	0	3	0	3	1	4	0	1	6	1	4	7	8	1	4	1	10	13	15	51	20	0	30	0	3	13	43	31	10	12	1	3	19	5	67	0	58	0	0	4	15	4	0	35	8
100129	PRJEB10878	ERR1018201	0	0	0	0	1	0	9	0	1	0	2	1	8	6	37	4	181	11	0	3	39	0	11	5	10	5	0	7	5	4	28	9	0	4	12	3	11	3	37	2	0	2	7	18	2	0	0
100130	PRJEB10878	ERR1018202	0	0	0	0	0	55	2	1	0	1	35	0	14	1	8	1	10	0	0	0	9	1	16	0	2	33	13	5	6	165	5	2	0	1	13	0	4	0	18	5	0	0	11	1	0	5	0
100131	PRJEB10878	ERR1018203	0	0	0	0	0	18	0	0	4	0	2	0	6	0	3	0	23	8	0	0	49	5	15	16	25	0	0	16	24	7	0	0	0	0	4	2	15	2	41	0	2	0	3	12	35	30	0
100132	PRJEB10878	ERR1018204	0	0	0	0	0	13	0	0	0	2	18	0	9	6	0	0	0	0	0	1	2	0	30	0	0	1	0	5	36	14	0	1	0	0	34	4	11	0	2	7	21	0	117	47	2	2	0
100133	PRJEB10878	ERR1018205	0	0	7	3	0	58	0	0	13	0	5	0	13	0	39	1	7	7	0	2	22	21	31	0	9	0	18	18	11	9	10	11	0	9	5	0	4	0	18	14	0	4	0	12	11	5	0
100134	PRJEB10878	ERR1018206	0	0	0	1	0	0	0	0	0	0	1	0	8	3	72	4	45	141	0	0	10	37	37	5	0	0	0	3	71	10	7	7	0	0	0	0	7	22	11	2	0	1	1	0	0	5	0
100135	PRJEB10878	ERR1018207	0	0	1	9	0	12	0	0	7	0	22	6	6	18	28	21	3	6	1	4	3	13	8	2	2	4	2	9	5	7	32	2	0	7	12	0	25	0	79	0	1	0	3	20	0	0	0
100136	PRJEB10878	ERR1018208	1	0	0	1	5	4	0	0	0	0	3	3	8	1	16	9	1	2	0	0	12	9	9	1	0	10	3	0	6	709	28	0	0	0	27	1	4	0	37	1	0	6	17	0	0	9	0
100137	PRJEB10878	ERR1018209	0	0	0	0	0	88	0	0	1	0	2	0	17	1	25	2	6	10	0	5	0	12	5	11	11	6	3	19	5	3	54	2	0	0	7	1	21	4	51	4	0	1	14	1	0	7	0
100138	PRJEB10878	ERR1018210	0	0	0	18	0	54	0	5	8	3	51	15	11	0	1	0	13	3	1	0	10	0	5	1	1	28	0	8	132	5	4	14	0	2	43	1	37	0	5	0	1	1	61	16	0	7	0
100139	PRJEB10878	ERR1018211	1	1	0	7	5	31	1	2	0	12	29	16	9	61	44	5	91	19	9	3	211	11	12	9	24	6	48	0	14	14	81	155	0	1	50	6	42	1	33	11	1	18	111	8	0	48	1
100140	PRJEB10878	ERR1018212	0	0	0	2	1	88	21	15	21	36	10	17	3	24	46	15	25	18	21	9	79	30	66	37	11	30	22	44	8	31	26	4	0	9	86	6	31	0	74	6	0	24	83	4	9	63	2
100141	PRJEB10878	ERR1018213	0	0	0	1	0	1	39	0	1	0	8	2	70	2	14	5	7	1	1	8	67	2	11	2	8	0	88	5	58	53	1	1	0	1	14	2	45	10	47	21	3	2	3	3	0	43	7
100142	PRJEB10878	ERR1018214	0	0	0	0	0	79	1	1	7	0	14	2	37	2	0	1	13	7	0	0	0	1	8	2	4	20	4	13	1	2	1	1	0	33	19	3	10	3	27	2	0	0	10	9	0	11	0
100143	PRJEB10878	ERR1018215	11	0	0	0	0	5	5	0	51	0	3	0	92	6	118	1	3	11	1	0	98	21	94	3	21	21	33	10	79	69	20	15	1	1	21	30	36	0	193	58	1	38	1	25	0	77	11
100144	PRJEB10878	ERR1018216	0	1	0	0	0	50	3	1	2	0	23	0	19	5	11	0	32	2	1	1	42	25	73	25	61	75	1	37	49	5	42	3	0	77	54	24	42	1	36	5	0	4	13	2	1	14	1
100145	PRJEB10878	ERR1018217	0	0	0	0	0	61	0	3	18	0	89	0	41	184	74	3	29	12	0	77	3	16	31	2	1	3	68	8	1	5	70	27	0	0	11	1	60	48	87	37	2	6	1	51	0	0	8
100146	PRJEB10878	ERR1018218	0	0	0	5	0	39	0	4	0	0	14	8	27	1	87	2	5	63	12	1	57	5	81	4	7	0	6	12	0	11	55	20	0	1	18	2	32	10	28	5	0	19	5	4	0	0	0
100147	PRJEB10878	ERR1018219	0	0	0	14	0	79	0	1	0	0	19	0	163	9	4	1	58	3	0	1	50	5	19	4	1	9	47	13	41	45	17	4	0	5	5	3	15	0	53	0	83	3	9	45	5	23	0
100148	PRJEB10878	ERR1018220	0	0	0	6	2	20	3	5	4	1	204	42	23	3	56	14	17	4	1	1	171	41	209	2	3	66	21	3	24	11	26	13	6	28	54	9	20	42	44	1	0	39	6	21	0	219	0
100149	PRJEB10878	ERR1018221	0	5	0	15	0	11	14	17	6	48	48	13	37	6	10	16	122	42	51	3	62	5	55	48	52	20	3	9	39	28	36	10	0	3	74	3	58	1	56	6	0	18	391	46	0	52	0
100150	PRJEB10878	ERR1018222	0	0	7	1	1	60	12	3	13	36	7	10	17	17	83	26	20	2	14	0	34	9	63	15	2	40	39	37	22	13	37	0	0	0	226	37	21	1	55	13	1	7	126	31	2	4	0
100151	PRJEB7774	ERR688564	1	0	2	2	14	5	10	32	0	13	2	14	240	31	150	48	48	27	3	3	138	32	17	39	22	1	12	13	56	36	80	36	1	60	100	120	88	12	77	6	0	4	39	23	0	51	0
100152	PRJEB7774	ERR688565	0	0	47	1	1	10	13	0	6	7	7	8	323	14	28	63	55	1	34	5	85	27	29	32	17	49	15	4	37	10	35	19	0	0	117	49	31	3	76	2	0	13	87	11	1	39	0
100153	PRJEB7774	ERR688566	1	0	0	0	0	6	1	4	6	0	1	12	153	10	32	61	50	1	0	0	10	23	6	136	9	0	1	6	39	1	75	60	5	0	107	0	129	3	121	5	37	22	2	1	0	1	0
100154	PRJEB7774	ERR688567	16	1	28	2	2	45	1	0	0	14	23	11	29	84	14	18	56	1	15	0	120	70	32	12	3	10	3	11	43	39	9	7	0	25	140	6	22	0	30	3	0	6	91	23	0	42	0
100155	PRJEB7774	ERR688568	0	2	1	0	1	2	0	0	4	1	1	0	159	2	29	65	7	0	7	8	31	13	3	227	5	0	42	0	52	0	50	11	0	1	69	2	327	0	96	16	0	1	8	4	0	0	1
100156	PRJEB7774	ERR688569	0	0	0	2	5	18	1	17	2	8	10	9	137	17	24	27	49	1	42	4	39	3	45	19	12	12	15	12	46	14	38	7	0	3	90	28	18	2	39	7	2	57	213	41	0	7	0
100157	PRJEB7774	ERR688570	0	0	0	1	0	13	12	4	4	2	7	3	97	18	44	20	21	1	3	3	13	4	13	19	7	5	4	8	9	101	8	5	0	0	20	4	26	2	45	4	0	3	26	4	29	5	0
100158	PRJEB7774	ERR688571	0	0	0	0	0	0	0	0	0	0	2	0	67	30	4	37	0	1	0	0	46	10	1	84	1	0	83	0	0	0	3	0	1	0	20	0	81	0	23	0	0	21	2	4	0	0	0
100159	PRJEB7774	ERR688572	0	0	0	0	0	1	0	1	0	0	0	2	41	27	51	79	50	1	0	0	67	29	9	66	5	6	22	0	34	0	52	29	0	0	97	57	103	0	212	0	1	21	19	0	0	26	0
100160	PRJEB7774	ERR688573	0	8	0	4	2	19	8	1	3	4	4	1	24	3	58	91	80	8	6	1	92	153	60	48	86	7	10	1	48	7	32	7	1	2	146	8	61	0	30	0	0	31	39	21	1	48	0
100161	PRJEB7774	ERR688574	0	0	3	5	1	11	0	6	3	15	41	3	16	20	26	14	30	15	14	1	98	9	65	8	2	8	13	10	38	11	16	5	1	9	73	6	28	2	34	2	1	27	105	17	3	1	0
100162	PRJEB7774	ERR688575	0	0	2	0	3	64	18	4	32	6	34	29	115	2	68	34	49	2	21	2	59	27	41	3	3	11	62	9	7	10	44	4	6	0	101	9	24	5	51	7	1	5	34	20	1	20	1
100163	PRJEB7774	ERR688576	0	1	0	2	0	63	18	5	2	10	6	14	27	1	181	27	59	5	23	6	50	8	44	47	7	4	26	10	11	18	242	21	0	1	78	34	78	8	60	2	0	6	16	10	1	7	0
100164	PRJEB7774	ERR688577	0	0	0	4	3	35	5	10	1	1	7	7	78	11	60	31	71	8	2	9	20	13	10	14	7	4	11	12	5	165	37	3	0	0	94	14	26	0	109	3	0	4	17	11	1	13	0
100165	PRJEB7774	ERR688578	0	2	0	1	7	60	39	9	13	3	2	8	68	12	55	23	69	5	2	1	159	6	11	27	10	6	14	15	26	9	78	16	0	3	32	10	44	0	75	0	0	2	16	12	2	12	0
100166	PRJEB7774	ERR688579	0	1	0	1	0	23	3	6	2	3	15	9	43	2	94	26	57	3	21	0	33	4	32	29	7	10	9	10	28	11	22	0	14	6	84	32	30	4	59	0	0	9	26	38	2	14	1
100167	PRJEB7774	ERR688580	0	1	0	4	10	14	1	7	1	6	14	2	11	11	18	16	32	1	0	1	99	84	15	18	5	8	3	6	48	240	40	8	7	1	88	116	20	0	98	0	0	16	26	7	1	52	1
100171	PRJEB7774	ERR688590	0	1	0	6	6	41	30	10	12	13	5	4	183	6	22	20	18	5	1	17	43	20	26	22	7	1	9	7	5	11	43	5	0	2	42	8	27	4	53	2	0	19	36	4	0	26	4
100172	PRJEB7774	ERR688591	0	0	0	0	73	0	15	0	0	0	0	0	244	2	0	3	0	0	0	0	106	81	1	142	0	0	1	0	2	0	23	0	0	0	10	27	141	0	80	49	0	18	0	0	1	66	0
100173	PRJEB7774	ERR688593	3	0	3	1	13	13	1	3	14	16	3	33	28	12	57	15	79	3	8	2	47	10	25	21	9	10	5	6	22	2	21	19	1	0	119	22	30	2	78	12	3	19	18	110	4	11	1
100174	PRJEB7774	ERR688594	1	1	0	0	0	2	2	3	0	0	0	0	119	5	2	33	0	0	1	1	1	141	3	86	3	0	34	1	246	0	27	32	0	0	1	120	118	0	46	0	0	11	3	0	0	0	0
100175	PRJEB7774	ERR688595	0	0	0	1	0	12	5	2	2	0	3	4	136	15	44	15	14	2	3	2	36	13	9	37	10	1	21	12	30	347	37	17	0	0	29	9	27	8	43	1	0	13	1	8	0	18	0
100176	PRJEB7774	ERR688596	0	1	3	0	13	1	15	4	1	5	5	0	201	19	50	41	104	1	0	3	80	15	12	134	0	5	26	11	129	2	88	0	0	1	88	3	149	1	71	6	2	15	2	38	0	0	0
100179	PRJEB7774	ERR688600	0	0	0	0	0	5	9	0	5	4	32	10	58	19	63	35	23	2	19	5	45	9	28	10	3	0	5	6	8	21	38	3	0	2	61	17	6	0	74	1	1	6	186	38	1	14	0
100182	PRJNA447983	SRR6915108	0	2	7	20	0	27	42	0	0	5	2	0	3	0	30	11	41	1	0	1	8	9	8	22	2	1	12	3	69	3	19	10	0	0	33	1	27	16	46	4	0	9	14	13	0	8	0
100183	PRJNA447983	SRR6915109	0	7	0	3	3	25	6	4	47	3	10	9	1	29	25	35	232	6	0	17	75	35	19	5	12	0	73	8	64	7	20	34	0	0	65	23	22	9	77	6	0	6	28	97	0	40	1
100184	PRJNA447983	SRR6915110	0	0	0	0	3	23	0	0	2	0	11	13	0	4	21	12	6	9	0	0	48	14	53	14	2	0	0	12	8	0	30	6	0	1	29	7	13	2	22	1	0	5	0	0	1	26	0
100185	PRJNA447983	SRR6915111	0	0	0	1	0	1	0	1	0	0	4	0	0	70	6	18	82	2	0	1	8	106	27	134	1	10	0	14	3	1	30	31	0	5	143	48	109	0	45	2	0	13	1	18	0	1	0
100186	PRJNA447983	SRR6915112	0	0	0	0	1	36	3	0	61	3	3	6	2	31	58	13	24	2	6	2	12	50	8	44	9	8	50	6	17	7	50	29	1	3	88	32	31	4	49	13	0	18	2	24	0	24	0
100188	PRJNA447983	SRR6915114	0	4	1	0	0	40	4	3	3	2	11	0	0	13	26	10	4	12	1	4	10	15	6	17	1	2	16	3	6	4	62	12	0	0	16	3	65	9	33	3	0	5	30	2	4	1	0
100189	PRJNA447983	SRR6915115	0	0	4	123	0	1	0	24	6	22	2	0	0	8	5	0	91	1	9	0	0	5	13	0	1	2	3	13	12	0	1	14	4	0	35	1	4	2	42	0	0	0	7	91	5	2	117
100190	PRJNA447983	SRR6915116	6	1	1	0	2	16	101	2	10	6	5	17	3	4	52	17	68	6	26	0	8	1	12	30	35	6	28	3	19	11	38	1	0	4	54	16	20	0	19	1	0	8	48	4	0	9	0
100191	PRJNA447983	SRR6915117	0	1	0	0	3	31	1	1	27	1	0	2	20	35	76	11	21	2	1	1	30	3	11	61	1	5	82	3	25	15	59	15	0	0	69	6	34	1	30	11	0	22	6	9	1	16	0
100192	PRJNA447983	SRR6915119	0	0	0	4	0	23	1	27	3	0	7	7	0	0	12	4	683	5	43	1	14	12	1	4	3	0	0	3	31	7	5	0	0	1	20	36	23	0	18	0	0	0	5	7	0	7	0
100193	PRJNA447983	SRR6915120	0	2	0	0	0	165	21	1	9	5	3	0	2	0	20	11	24	0	0	0	6	1	15	0	0	0	8	3	7	0	10	2	0	2	12	2	5	0	4	1	0	2	10	91	59	10	0
100194	PRJNA447983	SRR6915121	0	0	0	0	0	21	0	11	3	51	76	6	13	7	118	3	115	11	11	0	169	8	54	7	18	114	3	84	31	14	167	4	0	5	239	33	28	0	135	3	0	41	140	13	0	22	0
100196	PRJNA447983	SRR6915123	0	0	0	1	0	15	16	4	1	34	6	2	0	0	17	2	49	0	1	0	25	4	9	1	1	0	7	8	6	4	61	0	0	2	72	0	17	0	44	1	0	5	156	22	4	10	0
100197	PRJNA447983	SRR6915125	0	0	0	1	14	76	1	4	1	0	36	11	0	77	13	0	88	7	5	2	1	0	6	7	7	0	108	9	6	115	25	45	1	0	28	1	39	0	61	4	0	8	40	11	0	19	0
100198	PRJNA447983	SRR6915126	1	2	0	2	15	212	0	3	9	13	14	10	0	11	21	57	20	11	8	1	67	5	19	4	16	3	21	30	25	11	63	1	1	5	42	0	48	0	16	0	0	8	5	3	2	32	0
100199	PRJNA447983	SRR6915127	0	3	0	11	15	22	16	17	0	3	31	29	1	4	42	10	37	4	14	4	108	94	27	6	10	12	8	52	33	10	9	16	0	4	61	19	9	1	25	9	2	2	48	7	1	29	0
100200	PRJNA447983	SRR6915128	0	1	1	2	0	12	17	10	8	12	13	15	0	153	14	4	20	1	2	1	28	18	16	13	1	12	37	10	5	4	9	3	7	4	18	7	9	4	11	0	0	11	20	6	105	9	0
100203	PRJNA447983	SRR6915131	0	0	7	3	24	155	4	2	61	14	3	30	15	6	34	10	39	6	16	1	40	44	7	50	11	29	129	19	54	3	109	13	0	3	95	162	83	3	59	3	0	28	52	64	1	24	0
100204	PRJNA447983	SRR6915132	0	0	0	2	3	21	1	4	1	12	10	26	3	15	38	5	62	5	18	1	47	13	19	3	0	2	22	10	110	15	32	9	2	2	49	65	9	1	46	6	0	33	396	108	5	16	0
100207	PRJNA447983	SRR6915135	0	0	0	1	0	11	24	1	1	21	13	4	2	2	1	15	10	13	2	0	16	3	4	22	7	22	7	10	5	6	4	11	1	1	43	6	34	0	35	5	0	8	76	7	2	5	0
100208	PRJNA447983	SRR6915136	10	0	0	0	5	6	64	3	58	1	12	12	2	2	36	15	31	2	16	4	23	0	10	31	22	1	77	3	11	6	44	6	26	3	25	9	27	3	18	0	0	32	23	29	97	0	0
100210	PRJNA447983	SRR6915144	0	0	0	2	1	106	0	22	10	3	3	10	3	6	35	21	108	3	58	0	56	2	5	32	5	7	47	13	8	44	102	3	0	6	183	24	129	0	25	0	0	4	72	29	0	8	5
100211	PRJEB10878	ERR1018223	0	0	0	1	0	11	2	2	2	72	92	4	52	8	34	8	41	9	19	7	150	3	124	6	7	81	21	4	4	3	81	12	0	2	77	70	11	6	56	6	8	19	114	395	13	93	0
100212	PRJEB10878	ERR1018224	0	0	0	1	0	3	0	0	0	0	2	0	37	87	33	0	1	40	0	36	9	0	4	20	0	1	0	5	0	32	5	4	0	0	2	0	63	2	18	0	0	17	5	38	0	0	1
100213	PRJEB10878	ERR1018225	0	0	0	8	1	9	4	17	1	4	262	13	8	1	35	0	13	3	2	1	17	3	20	2	8	4	20	8	5	2	34	0	1	7	10	0	11	5	25	0	1	1	59	26	0	2	0
100214	PRJEB10878	ERR1018226	0	0	1	0	0	54	0	0	3	8	1	8	46	10	28	6	118	17	2	6	101	7	20	4	19	1	28	25	38	30	28	1	0	27	22	1	10	1	101	20	6	10	98	13	3	29	0
100215	PRJEB10878	ERR1018227	0	0	0	9	3	75	7	7	3	3	12	15	35	24	28	4	78	119	0	5	126	2	58	6	7	15	16	39	13	8	12	3	0	9	30	1	17	10	30	5	0	8	6	7	0	5	1
100216	PRJEB10878	ERR1018228	0	0	0	0	0	7	0	3	4	3	9	17	22	3	71	9	87	11	11	1	87	32	62	33	8	48	3	22	39	37	3	3	1	0	100	1	36	1	117	5	1	28	10	3	34	33	1
100217	PRJEB10878	ERR1018229	0	0	0	0	0	5	5	1	10	1	3	2	35	43	190	8	92	0	1	23	22	9	51	41	1	83	11	15	20	9	88	39	0	1	31	4	45	2	118	3	1	11	2	4	0	21	7
100218	PRJEB10878	ERR1018230	5	0	10	21	0	77	42	0	13	36	20	1	15	1	29	28	5	6	15	2	76	40	64	14	55	12	16	2	29	22	169	3	0	1	21	38	30	5	27	5	0	9	37	228	10	14	1
100220	PRJEB10878	ERR1018232	0	0	2	9	0	10	6	10	9	5	24	6	48	6	131	17	51	2	21	4	18	3	118	13	4	6	15	6	17	7	45	8	0	2	56	34	41	35	112	8	1	4	13	21	0	10	0
100221	PRJEB10878	ERR1018233	0	0	0	3	0	31	3	0	4	0	5	0	24	5	6	0	3	43	0	2	85	16	47	2	0	1	0	41	59	51	7	1	0	1	5	4	27	0	82	9	0	4	3	13	0	59	0
100222	PRJEB10878	ERR1018234	0	0	0	0	0	5	0	0	0	1	376	2	4	0	3	1	1	1	0	1	5	2	0	5	1	337	8	1	7	0	9	4	0	10	1	0	9	0	2	0	0	1	0	0	1	8	0
100223	PRJEB10878	ERR1018235	0	0	30	1	0	112	26	0	37	1	7	15	35	3	175	20	57	3	0	1	24	10	38	2	8	65	92	6	12	13	106	21	0	1	60	3	35	45	121	31	1	11	10	2	27	8	1
100224	PRJEB10878	ERR1018236	0	0	0	1	0	8	2	2	0	0	8	10	31	0	84	7	6	0	0	0	2	0	18	21	1	53	22	2	4	1	43	0	0	0	18	6	34	10	13	9	1	2	1	1	3	0	0
100225	PRJEB10878	ERR1018237	0	0	0	0	0	0	1	6	1	0	59	0	25	1	79	0	19	3	0	5	2	3	1	9	10	38	1	5	4	95	96	30	1	0	27	0	89	1	42	49	14	1	0	12	0	0	1
100226	PRJEB10878	ERR1018238	0	1	0	0	19	16	0	0	2	0	57	8	34	7	255	10	37	0	0	12	13	21	19	10	27	427	31	10	50	23	31	13	0	1	56	34	145	96	65	7	38	12	21	5	54	19	0
100227	PRJEB10878	ERR1018239	10	0	32	1	0	30	12	8	1	0	3	6	44	9	67	18	116	5	3	4	47	6	8	2	14	3	0	4	30	16	114	7	0	0	107	28	32	1	88	21	0	54	50	3	1	26	1
100228	PRJEB10878	ERR1018240	28	0	23	1	3	45	6	0	17	2	6	8	49	5	65	8	57	15	1	0	3	8	13	6	7	9	34	10	23	10	21	5	0	0	56	129	14	8	43	3	0	6	1	32	9	6	0
100229	PRJEB10878	ERR1018241	0	0	0	0	0	18	0	0	8	0	19	19	64	2	0	0	9	34	0	0	13	4	41	0	10	0	0	21	10	10	3	2	0	3	19	0	20	15	10	0	17	26	21	8	0	6	0
100230	PRJEB10878	ERR1018242	0	0	0	3	2	22	0	0	10	3	0	3	20	6	82	9	3	1	0	2	12	2	141	25	7	5	35	6	4	341	17	17	0	0	16	19	22	0	70	6	0	7	1	6	0	11	0
100231	PRJEB10878	ERR1018246	0	0	3	6	1	46	18	7	26	2	6	15	43	1	145	2	10	2	1	0	22	39	30	4	0	21	60	4	8	31	21	2	0	1	33	125	42	3	68	2	0	34	3	60	0	72	0
100232	PRJEB10878	ERR1018247	0	0	0	2	1	37	20	3	0	12	7	26	19	1	39	5	50	17	30	3	103	7	22	2	12	67	15	44	2	4	10	6	7	2	35	2	15	3	31	3	2	5	60	23	1	3	0
100233	PRJEB10878	ERR1018248	1	1	36	2	1	26	32	20	8	0	24	9	48	1	46	9	47	13	10	4	43	16	34	5	1	6	3	6	21	51	23	2	0	0	42	69	28	5	36	8	0	8	45	4	5	8	0
100234	PRJEB10878	ERR1018249	0	0	0	2	0	28	2	3	0	2	4	4	24	6	54	3	14	1	1	2	8	0	19	0	0	6	61	5	5	6	42	2	0	1	10	11	15	18	42	8	0	2	5	6	0	0	0
100235	PRJEB10878	ERR1018250	0	0	0	4	1	0	4	2	42	0	20	1	12	65	220	3	223	9	1	28	4	5	52	8	0	1	9	8	10	22	171	11	0	1	28	7	129	5	34	5	1	10	18	6	0	0	19
100236	PRJEB10878	ERR1018251	0	0	0	0	0	0	0	1	3	2	7	0	25	0	22	2	5	3	0	0	8	1	76	0	5	35	3	4	2	28	37	1	0	0	10	0	9	2	27	9	0	0	8	57	0	2	1
100237	PRJEB10878	ERR1018252	0	0	0	0	0	8	0	2	43	0	2	3	36	1	192	2	38	16	0	2	16	4	26	59	5	4	40	18	9	8	36	4	0	6	30	5	9	3	54	6	0	1	3	3	0	7	0
100238	PRJEB10878	ERR1018253	1	0	0	1	0	12	5	16	32	14	29	9	18	0	57	56	19	45	22	0	20	53	48	9	11	41	21	18	55	4	67	4	0	36	18	8	20	3	25	2	26	7	11	33	1	5	1
100239	PRJEB10878	ERR1018254	0	0	0	3	2	31	0	4	0	8	28	11	18	21	31	6	75	29	8	2	149	17	15	23	17	0	19	2	27	24	68	61	0	0	48	4	49	0	31	6	2	5	75	5	1	55	5
100241	PRJEB10878	ERR1018256	0	0	0	5	0	5	1	6	39	1	2	6	21	4	59	7	85	3	0	9	28	17	20	17	8	38	34	9	15	3	58	5	0	57	63	9	10	10	63	19	0	2	5	28	135	16	0
100242	PRJEB10878	ERR1018257	2	0	3	0	1	17	24	9	23	21	3	5	37	2	77	46	51	1	13	3	50	15	41	50	19	19	12	3	31	25	114	26	1	24	49	7	15	4	74	12	1	3	21	53	2	6	2
100243	PRJEB10878	ERR1018258	0	0	0	0	0	46	0	2	77	0	43	0	39	11	4	0	19	2	0	1	8	7	16	6	0	1	64	7	16	3	3	8	0	34	30	4	43	13	38	19	2	4	11	6	2	0	2
100244	PRJEB10878	ERR1018259	3	0	16	1	3	59	25	1	46	3	41	3	28	0	64	3	24	13	0	0	17	8	7	14	1	37	65	5	7	9	28	4	10	0	40	17	25	7	25	2	1	1	2	49	9	6	2
100245	PRJEB10878	ERR1018260	0	0	1	0	2	36	2	0	2	0	5	0	108	6	5	0	2	38	0	0	8	2	23	2	1	0	0	6	1	0	0	4	0	2	6	0	10	1	13	3	0	2	5	4	0	0	0
100246	PRJEB10878	ERR1018261	1	0	0	2	0	58	0	1	115	0	18	0	39	41	15	2	15	1	0	2	5	15	1	61	10	1	126	13	31	2	12	62	0	0	13	9	86	0	103	25	0	0	1	2	0	6	8
100247	PRJEB10878	ERR1018262	39	0	63	0	0	52	94	7	45	44	4	17	38	0	67	5	88	8	0	6	8	8	125	1	3	60	84	1	15	41	35	1	1	0	80	8	56	10	33	12	1	5	4	155	0	0	4
100248	PRJEB10878	ERR1018263	0	0	0	0	0	5	2	1	66	0	4	1	26	4	150	4	43	5	0	0	9	11	12	11	8	0	109	2	34	8	100	15	0	1	21	24	64	7	41	38	1	6	6	1	57	0	1
100249	PRJEB10878	ERR1018264	0	0	0	0	0	21	1	0	14	0	26	2	36	11	45	0	44	4	0	0	15	17	6	5	1	5	16	9	9	3	15	8	1	1	31	9	25	0	60	7	0	1	1	16	2	3	4
100250	PRJEB10878	ERR1018265	0	0	10	12	0	324	3	3	12	6	7	8	28	5	53	1	34	0	2	0	23	1	45	6	2	28	24	4	3	19	43	6	0	3	28	7	17	8	23	5	29	6	32	51	7	8	0
100251	PRJEB10878	ERR1018266	0	0	1	3	0	103	3	3	3	2	34	24	52	15	35	18	38	21	13	0	55	9	47	10	9	55	28	14	30	7	37	42	0	0	44	41	45	0	42	12	0	9	78	55	0	36	0
100252	PRJEB10878	ERR1018267	3	0	4	1	0	29	19	3	10	24	3	17	40	4	27	8	31	5	12	1	50	24	43	6	7	50	21	28	5	6	42	8	0	16	18	31	14	9	11	7	0	0	51	28	26	6	0
100253	PRJEB10878	ERR1018268	0	0	0	1	3	34	20	10	29	83	21	39	18	22	68	3	54	4	49	4	23	0	77	29	5	14	45	60	18	6	24	5	0	5	23	41	23	0	33	2	0	13	191	104	15	51	0
100254	PRJEB10878	ERR1018269	0	0	8	1	1	100	0	2	0	0	2	1	31	1	41	0	43	10	0	1	8	0	48	11	13	0	7	12	22	4	31	18	0	0	64	1	24	0	31	23	0	24	2	1	0	0	0
100255	PRJEB10878	ERR1018270	0	0	0	1	0	117	0	2	55	0	3	10	26	10	58	0	54	0	0	2	4	2	7	28	20	53	125	13	0	6	36	7	1	0	12	3	22	28	21	33	0	11	2	46	0	0	0
100256	PRJEB10878	ERR1018271	0	0	0	0	0	2	68	7	2	1	8	16	19	0	44	0	12	8	1	0	11	58	29	3	1	4	6	8	5	441	16	1	0	0	27	1	13	4	14	0	0	2	12	13	9	3	1
100257	PRJEB10878	ERR1018272	0	1	25	1	0	21	11	12	15	1	11	29	37	0	84	12	126	23	4	4	73	0	30	17	8	3	59	18	8	9	43	5	8	1	170	6	87	6	34	6	0	3	14	118	0	9	1
100258	PRJEB10878	ERR1018273	0	0	2	2	3	8	29	3	98	9	7	17	36	0	69	30	62	11	22	2	9	46	58	38	51	6	76	15	6	13	51	12	0	1	27	7	30	10	22	2	2	13	58	45	85	6	1
100259	PRJEB10878	ERR1018274	0	0	7	16	0	70	82	2	103	0	18	20	38	2	29	2	53	8	3	0	27	11	5	58	1	13	126	7	25	2	33	0	3	1	51	3	5	10	24	6	0	12	3	369	1	3	0
100260	PRJEB10878	ERR1018275	4	0	23	4	0	16	4	9	15	2	3	4	82	3	59	7	38	7	0	1	13	6	111	9	0	0	25	7	16	1	23	0	0	1	44	47	7	0	71	4	32	2	8	2	0	0	1
100261	PRJEB10878	ERR1018276	0	1	21	0	0	120	26	3	53	2	0	13	10	2	61	4	8	3	1	1	7	10	18	1	3	11	67	1	2	0	18	5	0	0	17	3	8	15	9	12	0	0	6	36	31	7	0
100262	PRJEB10878	ERR1018277	0	0	0	7	0	2	3	0	21	1	9	11	43	6	55	19	82	11	1	0	14	1	60	33	28	0	11	32	13	12	116	27	2	1	39	28	46	4	159	11	0	8	7	7	0	8	4
200183	PRJNA397112	SRR8865580	0	0	3	3	1	0	1	3	3	1	10	4	0	0	10	2	18	1	1	0	4	0	14	4	22	1	4	6	6	11	9	0	1	9	7	6	2	1	8	0	2	6	5	9	1	4	0
200184	PRJNA397112	SRR5898982	0	0	0	0	1	0	0	3	5	3	1	1	0	0	9	0	0	1	6	0	1	0	3	0	5	2	0	0	6	0	1	0	2	0	2	1	4	0	2	0	0	7	2	1	1	0	0
200185	PRJNA397112	SRR5898985	1	0	0	0	0	3	3	1	1	0	1	2	4	0	7	0	4	0	2	0	13	1	1	3	4	0	1	10	12	1	3	0	0	0	2	3	3	0	6	0	0	3	2	1	0	4	0
200186	PRJNA397112	SRR8865577	0	0	1	2	1	0	1	1	1	1	1	5	0	0	6	1	1	2	4	1	10	1	2	2	21	2	2	9	10	7	5	0	0	4	2	7	2	1	4	0	3	6	10	12	1	5	0
200187	PRJNA397112	SRR8865593	0	0	0	2	0	2	7	0	0	1	4	1	2	5	21	1	4	0	12	0	10	1	4	2	3	4	3	2	2	2	10	3	0	0	3	15	11	0	4	0	0	0	1	9	0	1	0
200188	PRJNA397112	SRR8865575	0	0	0	0	2	2	2	0	2	0	0	1	0	0	1	0	6	8	0	0	3	0	3	0	2	0	0	0	1	4	21	1	0	0	4	2	1	1	0	1	0	0	0	0	0	1	0
200189	PRJNA397112	SRR8865594	0	0	0	0	0	0	0	0	0	0	10	6	4	0	5	0	2	0	0	0	0	3	2	3	0	19	3	0	21	9	0	0	0	0	14	4	4	3	7	0	0	0	0	0	0	0	1
200190	PRJNA397112	SRR8865573	1	0	0	1	0	6	0	6	1	2	14	3	1	1	3	5	36	6	8	0	3	0	6	0	3	0	0	2	3	3	12	1	0	10	2	0	1	2	1	0	0	2	6	0	0	0	0
200191	PRJNA397112	SRR8865579	0	0	0	3	0	4	1	2	2	0	10	1	0	0	1	0	6	8	5	0	6	0	8	0	4	0	2	0	5	3	9	0	0	1	4	3	2	1	1	1	0	2	3	5	4	1	0
200192	PRJNA397112	SRR8865586	0	0	0	1	0	0	1	1	0	0	18	4	0	0	5	0	2	0	0	0	1	0	1	4	1	13	1	1	2	4	1	0	0	2	4	0	1	3	3	0	0	1	0	0	0	1	0
200193	PRJNA397112	SRR8865597	0	0	0	0	0	1	1	9	0	0	0	1	0	8	0	1	1	0	1	0	0	1	0	0	47	0	1	0	3	0	2	0	0	0	1	1	0	0	3	3	0	18	2	0	0	0	0
200194	PRJNA397112	SRR8865600	0	0	0	0	0	6	2	1	0	0	0	4	1	10	3	1	1	0	3	0	2	0	2	0	5	5	7	2	1	2	5	0	1	2	3	5	2	0	1	0	0	1	2	0	1	0	1
200195	PRJNA397112	SRR5898987	0	0	0	0	0	0	0	7	0	1	8	1	3	0	3	4	3	0	4	0	15	0	9	0	5	3	3	3	13	5	5	0	0	10	7	7	8	0	5	0	0	5	12	6	0	2	0
200196	PRJNA397112	SRR5898983	0	0	0	0	0	0	0	0	0	17	10	0	0	0	0	1	2	0	0	0	0	2	0	1	1	4	0	1	5	1	2	2	5	212	0	2	1	0	0	0	0	0	0	0	0	0	1
200197	PRJNA397112	SRR5898921	2	0	4	0	1	4	2	3	0	3	4	2	1	1	1	1	12	1	2	0	7	2	1	3	42	1	3	9	2	10	3	0	0	0	0	4	0	0	2	0	0	0	4	6	7	0	0
200198	PRJNA397112	SRR8865591	0	0	0	0	0	1	1	0	0	0	3	0	0	1	3	0	13	3	0	0	1	0	6	0	1	0	0	2	1	1	3	0	0	0	5	2	0	3	2	2	1	0	3	3	0	0	0
200199	PRJNA397112	SRR5898978	0	0	0	1	0	0	0	0	0	6	5	3	1	1	3	0	6	0	1	0	3	0	3	3	1	4	0	1	0	7	5	0	0	12	0	2	1	0	1	0	0	0	0	0	0	1	0
200200	PRJNA397112	SRR8865574	0	0	0	0	0	4	0	0	0	0	2	1	0	2	6	0	10	2	3	0	3	0	1	0	0	0	0	6	2	4	15	0	0	0	2	1	3	1	4	1	0	0	2	1	0	4	0
200201	PRJNA397112	SRR5898979	0	0	0	0	0	0	1	0	1	0	1	0	4	0	4	0	3	0	0	0	3	2	3	0	0	0	0	2	1	3	7	1	0	14	2	5	3	0	2	1	1	0	0	0	0	0	0
200202	PRJNA397112	SRR8865578	0	0	2	0	0	4	0	1	0	0	3	1	0	2	1	0	8	5	3	1	12	0	11	0	15	1	9	3	5	2	0	0	0	0	1	3	1	1	3	1	0	11	19	5	1	3	0
200203	PRJNA397112	SRR8865581	0	1	0	2	0	2	2	1	0	1	7	0	0	1	1	0	5	3	9	0	13	0	15	1	2	1	5	2	2	2	12	1	0	0	2	1	1	1	2	2	1	4	6	7	2	2	0
200204	PRJNA397112	SRR8865598	0	0	0	0	0	7	3	2	0	0	15	3	8	3	9	0	4	1	2	0	5	35	9	3	6	18	9	2	17	39	28	2	4	2	21	5	27	3	8	0	0	1	2	7	0	1	1
200205	PRJNA397112	SRR8865583	0	0	0	0	0	0	2	3	1	1	11	0	0	0	2	1	26	4	3	0	3	0	7	0	0	3	5	2	2	1	1	0	0	7	2	1	0	0	1	1	0	2	4	1	1	1	0
200206	PRJNA397112	SRR8865601	0	0	0	0	0	0	0	0	0	0	45	0	0	0	0	0	2	0	0	1	3	2	0	2	1	38	1	0	1	1	2	0	0	0	2	0	2	15	2	0	0	0	0	1	0	2	0
200207	PRJNA397112	SRR8865572	0	1	0	0	0	0	0	1	0	1	0	8	0	0	1	0	4	0	3	0	5	8	2	3	54	7	1	2	4	5	10	0	0	3	2	2	2	0	8	0	0	8	16	0	0	0	0
200208	PRJNA397112	SRR8865595	0	0	0	0	0	8	0	0	0	0	0	0	0	3	0	0	0	0	0	0	1	0	2	0	3	0	0	0	0	3	34	0	0	0	10	0	6	2	0	0	0	0	0	1	0	0	0
200209	PRJNA397112	SRR8865587	0	0	0	0	0	0	0	0	0	0	1	0	0	0	0	0	1	0	0	0	0	63	0	0	0	2	0	0	0	21	0	0	0	0	1	2	3	0	0	0	0	0	0	0	0	0	0
200210	PRJNA397112	SRR5898981	0	0	0	0	0	0	34	0	0	1	0	5	0	0	1	0	2	0	0	0	3	1	1	2	20	2	2	0	0	2	1	1	0	0	4	6	2	3	0	0	0	1	4	2	0	1	0
200211	PRJNA397112	SRR5898923	0	0	0	0	0	0	3	0	5	15	2	0	0	0	0	4	0	0	0	0	24	0	0	0	0	0	3	1	10	3	1	0	0	0	2	2	0	0	5	0	0	0	0	0	0	0	0
200212	PRJNA397112	SRR5898925	0	0	0	0	0	1	0	0	0	0	0	0	1	0	1	0	0	0	0	0	0	0	0	0	0	0	0	0	0	0	1	0	0	0	0	0	1	0	0	0	1	0	0	0	8	0	0
200213	PRJNA397112	SRR8865592	0	0	0	0	0	1	0	0	0	0	2	0	0	0	2	1	2	0	4	0	0	0	1	0	2	0	0	2	0	0	0	0	0	0	0	5	1	0	11	0	0	0	3	0	0	0	0
200214	PRJNA397112	SRR5898986	0	0	0	0	0	0	0	0	0	0	1	1	3	0	5	1	1	1	0	0	1	0	1	0	1	1	0	0	0	4	8	0	1	6	1	2	6	0	0	0	1	0	1	0	0	0	0
200215	PRJNA397112	SRR8865599	0	0	0	0	0	0	0	0	0	0	8	1	8	0	4	0	3	0	0	0	11	5	1	1	2	12	3	3	0	43	1	1	0	0	3	0	16	0	8	0	0	0	0	0	0	3	0
200216	PRJNA397112	SRR8865584	0	0	0	0	0	0	7	4	0	0	0	0	2	1	4	1	28	3	3	0	2	1	1	0	39	5	1	3	0	1	10	1	0	4	1	5	5	0	4	0	0	3	6	4	0	3	0
200217	PRJNA397112	SRR5898911	0	0	0	0	0	0	0	1	0	0	1	1	82	0	1	0	1	0	0	0	0	0	0	0	0	3	0	0	1	0	4	0	0	1	0	0	0	0	0	0	0	1	0	0	0	0	0
200218	PRJNA397112	SRR8865596	0	0	0	0	0	0	0	0	0	0	2	0	0	0	0	0	0	0	0	0	0	53	0	0	0	0	1	0	0	15	0	0	0	0	1	2	3	0	0	0	0	0	0	0	0	0	0
200219	PRJNA397112	SRR8865576	0	0	0	0	0	5	2	0	0	0	0	0	2	3	0	0	0	0	0	0	2	1	3	1	1	0	0	2	6	8	46	0	0	0	0	0	1	0	2	0	0	1	0	0	0	4	0
200220	PRJNA397112	SRR8865582	0	0	0	0	1	2	0	1	1	0	1	1	0	0	0	0	7	2	3	1	2	0	5	0	4	1	2	2	0	0	3	2	0	0	1	1	3	0	2	0	0	6	6	2	0	5	0
200221	PRJNA397112	SRR5898924	0	0	0	0	0	0	0	0	0	0	2	2	2	0	2	0	0	0	0	0	1	0	0	0	0	1	1	0	0	2	1	0	0	3	1	0	0	0	0	1	0	14	0	0	0	1	0
200222	PRJNA397112	SRR5898908	0	0	0	0	0	1	4	0	3	0	2	2	2	7	3	0	2	0	1	0	2	0	0	4	3	2	4	0	1	1	10	1	0	1	0	2	1	0	1	6	0	2	5	0	1	1	0
200223	PRJNA397112	SRR5898922	1	0	0	2	0	4	0	0	3	0	0	3	2	0	4	0	0	3	0	0	2	6	0	1	0	0	2	0	0	1	10	0	0	44	0	4	5	1	3	0	0	6	0	0	0	0	0
200224	PRJNA397112	SRR8865588	0	0	0	0	0	0	0	0	1	0	1	0	0	1	7	0	0	0	0	0	1	1	0	1	0	3	0	0	0	7	5	1	0	19	0	0	3	3	1	0	0	0	0	1	0	0	0
200225	PRJNA397112	SRR5898912	0	1	0	0	0	0	3	0	0	0	1	2	5	0	1	0	1	0	0	0	2	0	0	0	0	1	0	0	0	0	3	0	1	0	1	1	1	0	0	0	0	0	0	0	21	1	0
200227	PRJNA397112	SRR5898984	0	0	0	0	0	0	2	2	0	0	0	0	5	0	2	0	4	0	0	1	1	1	0	1	0	2	0	0	1	4	0	0	1	1	3	1	0	0	0	0	0	1	2	1	0	1	0
200228	PRJNA397112	SRR8865590	0	0	0	2	0	0	1	0	0	1	11	0	0	0	1	0	0	0	6	1	11	1	9	0	2	0	0	0	2	0	13	0	0	0	1	0	0	1	1	0	0	2	0	1	2	0	0
200229	PRJNA397112	SRR5898980	0	0	0	0	0	12	4	1	3	0	0	0	2	0	3	5	2	1	1	0	2	0	1	1	0	0	1	5	1	1	6	0	0	5	2	2	2	1	6	0	0	0	6	0	0	0	0
200230	PRJNA397112	SRR5898909	0	0	0	1	0	6	0	0	1	0	0	0	4	0	5	0	0	0	0	0	4	0	1	0	0	0	3	5	0	1	0	0	0	11	1	0	3	9	0	0	0	0	0	1	0	3	0
200231	PRJNA397112	SRR5898920	0	0	0	0	1	0	1	0	1	6	0	1	0	7	0	0	10	2	1	0	14	0	0	1	0	3	0	0	0	1	1	0	0	0	1	0	1	1	2	0	0	0	2	2	0	0	1
200232	PRJNA397112	SRR5898926	0	0	0	0	0	1	0	0	0	0	1	0	1	0	0	0	0	1	0	0	0	0	0	0	0	1	1	0	0	1	0	0	0	2	0	0	0	1	1	0	0	2	1	1	3	0	0
200233	PRJNA397112	SRR8865589	0	0	0	0	0	0	0	1	1	5	0	9	0	0	3	0	1	0	5	0	0	4	1	1	32	3	0	0	0	0	5	0	0	4	1	2	0	0	3	0	2	5	13	0	0	0	0
200234	PRJNA397112	SRR5899007	0	0	0	1	0	0	1	2	0	1	7	2	0	0	3	0	0	1	0	0	2	0	0	0	1	3	0	0	0	0	2	0	1	1	0	0	0	1	0	0	0	0	0	0	0	0	0
200235	PRJNA397112	SRR5899006	0	0	1	1	0	0	1	4	1	2	0	2	4	10	3	3	22	1	3	0	3	0	7	0	6	1	1	2	2	0	8	0	0	0	4	0	0	2	2	1	0	1	2	0	0	0	0
200236	PRJNA397112	SRR5899005	0	0	0	0	0	0	0	1	0	1	6	1	2	0	0	0	2	0	0	0	0	0	1	0	1	0	2	1	0	0	1	0	0	2	0	1	0	0	1	0	0	0	0	0	0	0	0
200237	PRJNA397112	SRR5898950	0	0	3	0	0	0	0	0	0	0	1	0	0	0	2	0	1	3	0	0	2	3	4	1	0	8	0	2	0	0	1	1	0	1	0	0	3	0	0	0	0	1	0	0	14	1	0
200238	PRJNA397112	SRR5898948	0	0	0	0	0	19	2	0	0	0	0	2	0	0	8	0	1	0	1	0	0	1	1	0	0	2	1	0	0	1	1	1	0	0	2	0	3	0	1	1	0	1	0	0	0	0	0
200239	PRJNA397112	SRR5898910	0	0	0	1	0	0	1	0	0	0	0	1	2	1	1	0	0	0	0	3	4	1	1	1	0	5	2	0	2	0	1	0	0	26	0	0	3	2	4	0	0	0	0	0	40	0	0
200240	PRJNA397112	SRR5898954	0	0	0	0	0	0	0	0	0	0	0	4	0	0	0	0	0	1	0	0	0	1	1	0	0	0	0	0	1	1	0	0	0	0	0	0	1	0	1	0	0	0	0	0	0	0	0
200241	PRJNA397112	SRR5899017	0	0	3	0	0	0	0	3	0	0	1	0	2	0	1	0	3	0	0	0	4	2	0	0	0	6	0	1	1	0	3	1	0	3	1	0	2	0	0	0	0	0	0	1	13	0	0
200242	PRJNA397112	SRR5898966	0	0	0	0	0	0	0	6	0	10	0	1	2	0	0	0	12	0	0	0	2	0	0	0	1	0	0	0	1	1	2	0	0	2	2	0	2	0	1	1	0	7	0	0	0	0	0
[truncated: 247 more columns]
