# Supplementary material for: The Archaeome's Role in Colorectal Cancer: Unveiling the DPANN Group and Investigating Archaeal Functional Signatures
Source: Preprints.org preprint supplement (doi:10.20944/preprints202308.1572.v1), 2023-08-22
Supplement: Supplementary file 3 [file Supplementary data S3 (Processed Kraken abundance).xlsx]

## Sheet: Processed Kraken abund. phyla
#ID	Euryarchaeota	Thermoproteota	Nitrososphaerota	Candidatus Geothermarchaeota	Candidatus Micrarchaeota	Candidatus Lokiarchaeota
1001	278255	74701.9	12355.8	802.885	38.4615	158.654
1002	128667	75623.3	734.417	178.862	658.537	162.602
1003	376833	72493.9	1638.82	791.155	63.8821	144.963
1004	131787	77566.3	1697.07	710.843	79.1738	209.983
1005	82644.4	38573.3	1124.44	800	4.44444	195.556
1006	95547.4	20051.4	2241.11	124.506	193.676	681.818
1007	281343	86383.8	2888.89	520.202	303.03	176.768
1008	209204	17493.8	1820.99	37.037	246.914	716.049
1009	456445	35477.7	1836.94	676.433	152.866	170.701
2001	87963.2	1574.27	791.73	721.286	108.729	169.985
2002	103812	2817.78	804.444	0	2.96296	192.593
2003	867103	19827.6	16069	264.368	344.828	390.805
2004	170297	5784.98	2443.69	119.454	597.27	283.276
2005	556824	10114.5	6702.29	389.313	320.611	290.076
2006	134017	5951.88	797.071	127.615	75.3138	2387.03
2007	758194	13500	8193.55	435.484	32.2581	532.258
2008	85824.7	2668.44	955.367	1000	39.3199	5.3135
2009	253703	3317.26	3065.99	796.954	109.137	93.9086
10010	160588	84193	2827.49	543.86	114.035	342.105
10011	382613	121244	1976.19	125	410.714	464.286
10012	154068	27351.5	2774.76	652.427	287.379	60.1942
10013	156843	49640.7	1173.84	546.358	96.0265	357.616
10014	307390	24705.6	4090.91	64.9351	519.481	415.584
10015	334674	165849	3058.14	69.7674	313.953	616.279
10016	135885	68640.1	2480.83	415.929	368.732	215.339
10017	190165	44773.4	874.384	120.69	4.92611	1315.27
10018	88682.1	34615.1	1006.87	318.729	399.485	281.787
10019	89934.9	28227.8	837.278	2.95858	159.763	869.822
10020	136539	20183.3	547.17	649.596	2.69542	450.135
10021	115217	14795.7	912.766	680.851	29.7872	289.362
10022	1.88287e+06	42122	9780.49	48.7805	121.951	829.268
10023	66740.1	9941.5	461.224	1.36054	537.415	757.823
10024	170807	20276.2	1765.19	649.171	149.171	201.657
10025	256688	21550.7	1463.77	358.696	7.24638	634.058
10026	90189.1	9651.91	853.119	879.276	100.604	46.2777
10027	182874	20900	1588.24	691.176	232.353	76.4706
10028	69285.6	4295.73	768.619	219.089	12.2921	1132.32
10029	102947	9838.6	701.754	357.895	121.053	521.053
10030	218154	18498.8	1526.05	630.273	69.4789	300.248
10031	91024.7	13499.3	550.218	1.4556	0	448.326
10032	174069	18141.6	1683.73	539.157	274.096	186.747
10033	175963	23779.4	702.006	114.613	183.381	1659.03
10034	126769	10830.3	819.495	657.04	176.895	166.065
10035	131813	18002.9	795.977	28.7356	183.908	787.356
10036	60202	6775.88	437.186	27.1357	0	535.678
10037	326064	52829.8	751.773	63.8298	184.397	1716.31
10038	251575	13993	2679.91	488.318	37.3832	474.299
10039	136672	12010.4	817.708	450.521	36.4583	513.021
10040	176453	12973	2422.3	402.027	361.486	236.486
10041	122512	14496.1	984.416	680.519	90.9091	228.571
10042	62277.6	6083.21	606.775	342.415	0	50.81
10043	161554	12480.9	724.34	64.5161	923.754	211.144
10044	844949	117153	6677.97	50.8475	33.8983	915.254
10045	375451	26656.4	728.205	15.3846	256.41	882.051
10046	88890	9230.18	794.118	104.859	859.335	101.023
10047	128817	11818.3	852.647	20.0286	127.325	2449.21
10048	55067.5	25101.9	555.687	172.986	0	271.327
10049	860049	873098	4951.22	97.561	243.902	658.537
10050	95465.4	40807.7	1300	11.5385	246.154	742.308
10052	94096.1	40630.6	588.633	136.671	274.696	706.36
10053	258060	62555	1090	5	425	570
10054	363921	74622.2	3034.92	9.52381	6.34921	984.127
10055	111477	22185.7	1402.04	22.1465	139.693	838.16
10056	195320	57198.7	1255.89	127.946	80.8081	791.246
10057	132376	31362.6	1820.61	532.443	103.053	364.504
10058	138542	36348.1	1392.23	7.06714	102.473	890.459
10059	149071	62317.5	1957.67	507.937	232.804	259.259
10060	95701.3	35111.1	959.927	763.206	134.791	102.004
10061	184336	8750	2059.21	657.895	276.316	65.7895
10062	128424	3082.24	1733.55	809.211	46.0526	144.737
10063	322436	8578.95	2924.81	827.068	157.895	15.0376
10064	765816	53344.8	3471.26	22.9885	11.4943	965.517
10065	113184	2812.5	937.5	789.474	19.7368	190.789
10066	214525	5816.14	2085.2	381.166	143.498	475.336
10067	179580	7106.19	2530.97	420.354	185.841	393.805
10068	159710	5989.07	1535.52	595.628	43.7158	360.656
10069	326127	1393.53	2725.07	285.714	64.69	649.596
10070	482279	12653.1	1795.92	292.517	149.66	557.823
10071	168777	3417.31	1313.76	527.048	125.193	347.759
10072	87917.2	4537.16	1055.74	133.446	375	491.554
10073	705224	5251.91	1297.71	491.094	152.672	356.234
10074	2.73857e+06	11976	1195.21	250	345.89	404.11
10075	313134	1162.61	720.871	692.702	17.9257	289.373
10076	167441	7306.4	1814.81	710.438	33.67	255.892
10077	128751	1411.47	1132.17	907.731	37.4065	54.8628
10078	126695	7133.72	482.558	478.198	65.407	456.395
10079	65859.3	3222.51	452.685	319.693	227.621	0
10080	189262	9573.77	1418.03	389.344	213.115	397.541
10081	171318	8847.91	1192.46	781.965	196.501	21.5343
10082	334886	14043.1	2292.31	667.692	295.385	36.9231
10083	113189	1943.86	1361.62	90.0783	690.601	219.321
10084	226275	5140	3015	155	685	160
10086	171643	4134.5	1906.43	210.526	377.193	412.281
10087	140319	4545.98	4103.45	91.954	537.356	370.69
10088	484657	35164.2	3701.49	507.463	402.985	89.5522
10089	1.64122e+06	50512.2	12609.8	365.854	195.122	439.024
10090	152886	9290.91	802.597	18.1818	179.221	4581.82
10091	185148	42085.7	1358.44	602.597	345.455	51.9481
10092	187707	61863.5	2056.22	682.731	152.61	164.659
10093	298280	140831	3031.11	4.44444	386.667	608.889
10094	317722	87103.7	4170.12	518.672	199.17	282.158
10095	568419	40247.2	2187.27	569.288	153.558	277.154
10096	35065.5	3941.53	80.8824	0	67.2269	851.891
10097	228773	36203.1	804.688	164.062	31.25	1648.44
10098	299006	34842.7	3797.75	5.61798	320.225	674.157
10099	159797	11295.1	1517.79	354.414	184.453	461.133
20010	345383	7387.56	3703.35	722.488	81.3397	196.172
20011	73073.1	1779.6	858.518	884.504	4.81232	136.67
20012	266579	3082.01	2386.24	616.402	214.286	169.312
20013	74085.8	2244.53	1147.81	717.153	32.8467	250
20014	1229520	50960	11040	400	280	320
20015	341339	9600	2365.22	165.217	573.913	260.87
20016	282312	9330.28	2376.15	128.44	504.587	366.972
20017	246573	8250	2056.45	177.419	612.903	209.677
20018	188329	7092.86	1764.29	121.429	592.857	285.714
20019	892960	6880	1946.67	320	253.333	426.667
20020	880871	7185.71	1771.43	342.857	257.143	400
20021	783425	6487.5	1562.5	350	212.5	437.5
20022	903455	8030.3	2151.52	393.939	136.364	469.697
20023	494734	5630.63	4090.09	702.703	279.279	18.018
20024	192153	3859.5	1822.31	471.074	227.273	301.653
20025	108020	1581.95	1112.34	716.39	46.0405	237.569
20026	108507	4696.52	791.045	855.721	87.0647	121.891
20027	612449	8622.45	4438.78	469.388	163.265	367.347
20028	533491	7685.19	3583.33	527.778	101.852	370.37
20029	502491	6956.14	3166.67	517.544	166.667	315.789
20030	555210	7730	3880	440	180	380
20031	225571	4161.76	2947.06	202.941	267.647	529.412
20032	75075.9	3848.28	820.69	162.069	0	17.2414
20033	386120	5124	1724	280	80	640
20034	516316	34306.1	4295.92	734.694	71.4286	193.878
20035	1.48411e+06	9877.78	5522.22	333.333	111.111	555.556
20036	183070	5993.38	2619.21	433.775	9.93377	556.291
20037	660738	13351.7	3710.34	317.241	275.862	406.897
20038	235640	5824.64	3061.61	909.953	9.47867	80.5687
20039	302953	8472.66	5281.25	605.469	117.188	277.344
20040	151611	3301.51	2666.67	820.771	127.303	51.9263
20041	360122	3042.68	1963.41	262.195	676.829	60.9756
20042	306753	2752.69	1580.65	166.667	763.441	69.8925
20043	338629	3119.76	1772.46	251.497	670.659	77.8443
20044	305598	2525.14	1581.01	217.877	653.631	128.492
20045	138920	5243.37	1561.45	761.446	103.614	134.94
20046	205540	7231.67	3340.18	736.07	61.5836	202.346
20047	178799	4166.67	1485.29	828.431	39.2157	132.353
20048	114382	3140.52	1678.1	846.405	24.5098	129.085
20049	202638	13152.4	2733.33	447.619	57.1429	495.238
20050	157310	10500	2277.78	428.571	47.619	523.81
20051	185642	12283	2471.7	367.925	103.774	528.302
20052	175925	11635.5	2168.22	448.598	65.4206	485.981
20053	59972.4	2640.12	854.518	1088.82	90.3522	55.1302
20054	665426	30841.6	7297.03	544.554	445.545	9.90099
20055	298340	4602.04	2197.28	823.129	37.415	139.456
20056	754300	6728.57	7914.29	742.857	85.7143	171.429
20057	41260.7	1187.04	591.556	403.044	0	5.4001
20058	186413	7921.31	2009.84	685.246	108.197	206.557
20059	360944	10097.2	2916.67	708.333	138.889	152.778
20060	262518	8289.16	2349.4	819.277	60.241	120.482
20061	234978	7279.57	2032.26	784.946	107.527	107.527
20062	242850	8875	2337.5	575	212.5	212.5
20063	211206	3975.76	2206.06	787.879	36.3636	175.758
20064	285319	5445.38	2941.18	731.092	42.0168	226.891
20065	277658	5366.67	3466.67	750	50	200
20066	263707	5130.08	2747.97	796.748	65.0407	138.211
20067	173117	5541.98	2346.06	798.982	127.226	73.7913
20068	245503	9070.18	4625.73	432.749	263.158	304.094
20069	244277	6517.73	3560.28	468.085	191.489	340.426
20070	275749	7089.69	2878.92	757.848	161.435	80.7175
20071	189974	10078.7	1498.36	685.246	308.197	6.55738
20072	72086	2705.88	1072.4	954.751	2.26244	42.9864
20073	75914.4	2803.53	1110.83	916.877	7.55668	75.5668
20074	69658.1	2620.93	1130.23	923.256	4.65116	72.093
20075	84375	2994.05	1288.69	913.69	20.8333	65.4762
20076	162831	3988.37	1784.88	226.744	598.837	174.419
20077	156184	3827.59	1764.37	218.391	609.195	172.414
20078	174045	4051.95	2246.75	220.779	558.442	220.779
20079	165994	4006.37	1726.11	254.777	566.879	178.344
20080	355039	11725.5	9941.18	941.176	9.80392	49.0196
20081	299643	5913.04	4217.39	545.894	178.744	275.362
20082	542587	12982	6203.59	538.922	149.701	311.377
20083	63912.8	3292.98	772.397	256.659	46.0048	697.337
20084	141238	3941.7	2170.4	757.848	206.278	35.8744
20085	439511	18021.3	6936.17	510.638	255.319	234.043
20086	343545	14236.4	5909.09	672.727	145.455	181.818
20087	425133	17555.6	7000	555.556	133.333	311.111
20088	331273	14563.6	5709.09	636.364	163.636	200
100100	429772	9070.87	5401.57	440.945	23.622	535.433
100101	922627	15343.4	8560.24	367.47	36.1446	596.386
100102	137207	4054.55	1494.21	568.595	390.083	41.3223
100103	451750	15260.4	7453.12	421.875	26.0417	552.083
100104	242723	15182.4	702.128	778.116	224.924	72.9483
100105	542555	26546.9	4359.38	921.875	7.8125	70.3125
100107	585646	6751.09	3650.66	532.751	4.36681	462.882
100108	540538	9683.76	7367.52	555.556	51.2821	393.162
100109	357332	6680.16	2404.86	902.834	12.1457	85.0202
100110	1.87745e+06	4894.99	1195.7	73.9857	694.511	231.504
100111	657613	19311.3	7641.51	235.849	75.4717	688.679
100112	499514	15243.1	8604.17	520.833	13.8889	465.278
100113	170653	5336.28	2126.11	457.965	327.434	214.602
100114	1.241e+06	5248.87	4027.15	493.213	248.869	257.919
100115	353243	9062.15	5090.4	423.729	265.537	310.734
100116	415909	6156.25	1693.18	585.227	19.8864	394.886
100117	253412	8831.62	3120.27	470.79	82.4742	446.735
100118	302916	7830.9	1248.43	945.72	20.8768	33.4029
100119	231316	16835.5	750	151.316	0	98.6842
100120	675107	18322.3	3768.6	90.9091	619.835	289.256
100121	282190	8316.13	1683.87	316.129	3.22581	680.645
100122	287145	5825.81	2009.68	48.3871	70.9677	880.645
100123	264188	23781.2	1993.75	37.5	6.25	956.25
100124	2660100	19940	3653.33	340	6.66667	653.333
100125	352576	17738.4	4029.07	447.674	5.81395	546.512
100126	173410	4461.75	2226.78	155.738	2.73224	841.53
100127	55171.9	2842.62	1426.15	2.42131	55.6901	941.889
100128	105418	3404.51	798.611	149.306	1336.81	52.0833
100129	175397	5085.47	1790.6	444.444	115.385	440.171
100130	1.21172e+06	34893.6	16766	234.043	148.936	617.021
100131	102270	7106.3	1336.61	82.6772	202.756	714.567
100132	59048.7	2646.96	433.043	6.95652	3704.35	560
100133	39098.7	3057.07	523.551	2.71739	0	473.732
100134	138586	7861.02	938.983	44.0678	16.9492	2044.07
100135	125518	6377.41	826.446	35.8127	137.741	1528.93
100136	599164	1238.32	883.178	98.1308	0	18.6916
100137	215521	9859.5	1826.45	181.818	33.0579	785.124
100138	206452	17264	1614.21	96.4467	568.528	335.025
100139	411012	11289.9	6076.92	366.864	88.7574	544.379
100140	185419	9583.58	1563.05	23.4604	76.2463	900.293
100141	123030	3355.26	2899.67	781.25	4.93421	213.816
100142	217625	16770.8	776.042	208.333	15.625	2677.08
100143	427107	14005.1	9010.15	588.832	5.07614	406.091
100144	91272	3466.22	988.176	6.75676	5.06757	1076.01
100145	210984	4051.77	2640.33	190.736	8.17439	801.09
100146	86578	3673.23	761.905	425.287	29.5567	545.156
100147	105500	7731.91	1605.26	37.8289	171.053	791.118
100148	77019.3	2589.43	895.325	99.5935	5.0813	928.862
100149	198367	6853.74	2251.7	122.449	486.395	391.156
100150	439111	2880.18	764.977	121.352	743.472	135.177
100151	3.33564e+06	29958	6907.56	638.655	117.647	243.697
100152	266755	9451.26	4602.89	126.354	227.437	646.209
100153	432866	5681.53	4382.17	910.828	38.2166	50.9554
100154	935034	6060.85	1054.77	267.748	535.497	196.755
100155	686571	17057.1	5028.57	128.571	28.5714	842.857
100156	1.79099e+06	2599.27	866.017	66.9915	1114.49	66.9915
100157	598133	11912.8	3317.95	292.308	184.615	523.077
100158	390550	20355	4970.41	189.349	5.91716	804.734
100159	831442	31548.1	9759.62	894.231	76.9231	28.8462
100160	413331	14794.3	4565.71	142.857	794.286	62.8571
100161	112694	4573.98	1305.69	112.195	679.675	208.13
100162	291018	9396.45	2307.69	615.385	47.3373	337.278
100163	361660	7844.34	5966.98	410.377	169.811	419.811
100164	168374	5852.01	1306.55	198.732	88.7949	712.474
100165	456879	19192.9	3892.86	657.143	185.714	157.143
100166	275025	8561.58	3891.63	453.202	305.419	241.379
100167	3.01355e+06	46230.8	5500	817.308	57.6923	125
100171	298198	13431.1	3874.25	742.515	197.605	59.8802
100172	541183	30832.1	4297.71	580.153	305.344	114.504
100173	810598	3937.06	2153.85	793.706	45.4545	160.839
100174	575952	52264	2608	576	400	24
100175	764667	9948.15	3333.33	851.852	29.6296	118.519
100176	779248	45926.6	4798.17	724.771	100.917	174.312
100179	269756	5350	2862.5	243.75	468.75	287.5
100182	158671	2900.27	1566.04	865.229	18.8679	115.903
100183	815892	13548.7	2577.62	339.35	97.4729	563.177
100184	67441.7	2708.48	673.145	286.219	40.636	772.085
100185	1.05321e+06	73013.7	7123.29	356.164	602.74	41.0959
100186	159317	4361.6	2379.05	735.661	84.788	179.551
100188	156040	5095.24	2138.89	476.19	269.841	253.968
100189	317267	14422.4	750	77.5862	172.414	3793.1
100190	106123	3861.61	611.607	415.179	125	459.821
100191	142026	2324.79	2121.79	848.291	29.9145	121.795
100192	246931	11585.1	1117.02	122.34	585.106	292.553
100193	165319	12766	1000	205.674	248.227	546.099
100194	306759	16336.8	2302.41	567.01	398.625	34.3643
100196	220286	7071.43	2100	121.429	585.714	292.857
100197	132302	1771.2	1036.8	768	24	208
100198	141426	6454.23	1262.32	809.859	7.04225	183.099
100199	1063650	13018.2	1509.09	854.545	122.727	22.7273
100200	387918	6223.05	1702.6	137.546	219.331	643.123
100203	204461	5582.09	1770.69	781.547	101.764	116.689
100204	749672	1855.23	813.673	726.542	198.391	75.067
100207	739285	2513.89	1423.61	503.472	41.6667	454.861
100208	507341	6051.14	5096.59	482.955	22.7273	494.318
100210	297225	9471.37	2325.99	365.639	8.81057	625.551
100211	444382	11861.8	7878.05	154.472	130.081	715.447
100212	450757	3432.43	7695.95	783.784	6.75676	209.459
100213	239300	14429.2	1662.5	20.8333	108.333	870.833
100214	275735	8238.94	4022.12	75.2212	22.1239	902.655
100215	102170	3101.08	812.668	184.636	2.69542	2409.7
100216	267596	3474.72	1175.56	44.9438	5.61798	949.438
100217	227918	3738.94	3962.39	86.2832	103.982	809.735
100218	116349	3542.96	1159.79	73.8832	843.643	82.4742
100220	186583	2976.09	2739.13	710.87	34.7826	254.348
100221	128990	8748.5	1774.45	11.976	53.8922	934.132
100222	2.27041e+06	7116.28	10034.9	11.6279	11.6279	976.744
100223	363837	5831.96	4559.23	785.124	57.8512	157.025
100224	301784	26497.1	3099.42	140.351	654.971	204.678
100225	63592.4	3066.54	981.516	2.77264	0	15.7116
100226	3.33959e+06	67735.3	50705.9	29.4118	617.647	352.941
100227	394638	12627	2697.3	178.378	616.216	205.405
100228	216576	8395.78	1733.02	281.03	9.36768	709.602
100229	196750	14896.6	1219.83	30.1724	4.31034	965.517
100230	398417	4222.67	5089.07	295.547	60.7287	643.725
100231	137528	3943.91	1597.68	506.77	52.2244	441.006
100232	346829	4561.75	1812.75	366.534	7.96813	625.498
100233	291710	4763.29	4995.17	188.406	57.971	753.623
100234	162906	8507.85	3450.26	141.361	293.194	565.445
100235	1.0844e+06	9236.11	19555.6	263.889	152.778	583.333
100236	333329	13236.8	2342.11	328.947	105.263	565.789
100237	98606	1676.13	1278.8	317.195	61.7696	621.035
100238	61291.5	2287.93	740.741	23.8949	0	235.364
100239	422807	15710.2	4960.23	607.955	51.1364	340.909
100241	193174	4973.51	1949.23	79.4702	88.3002	832.23
100242	309081	4600.9	3524.66	668.161	49.3274	282.511
100243	46981	3218.27	575.326	86.5955	0	338.078
100244	268537	5908.26	3876.15	642.202	68.8073	288.991
100245	140456	10067.1	848.057	81.2721	70.6714	1212.01
100246	722452	14082.2	16260.3	68.4932	27.3973	904.11
100247	209070	6036.31	3321.23	201.117	27.933	770.95
100248	143825	3573.7	2181.41	113.379	22.6757	863.946
100249	499318	6570.71	2954.55	732.323	15.1515	252.525
100250	244382	16710.1	2314.01	198.068	251.208	550.725
100251	275650	12116.8	4411.17	390.863	25.3807	583.756
100252	198024	9330.14	3119.62	110.048	153.11	736.842
100253	329046	6335.24	2346.7	475.645	2.86533	521.49
100254	76248.8	3356.1	827.642	92.6829	0	79.6748
100255	198007	10246.6	3459.46	381.757	3.37838	614.865
100256	712854	2812.5	4715.28	236.111	277.778	486.111
100257	708526	8108.43	3365.46	493.976	64.257	441.767
100258	1.10673e+06	24937.5	15270.8	333.333	375	291.667
100259	134574	5582.21	2619.95	452.83	140.162	407.008
100260	421764	8752.81	4629.21	235.955	56.1798	707.865
100261	111461	6256.02	1897.59	560.241	39.1566	400.602
100262	54408	1191.45	1247.11	43.4487	13.5777	942.974
200183	483417	16833.3	2250	166.667	388.889	444.444
200184	125661	11193.5	532.258	451.613	0	16.129
200185	278069	21931	6344.83	758.621	172.414	68.9655
200186	908588	28529.4	2529.41	176.471	176.471	647.059
200187	45128.4	1445.95	989.865	287.162	641.892	70.9459
200188	190197	14114.8	344.262	98.3607	557.377	704.918
200189	290465	10943.7	816.901	140.845	0	42.2535
200190	221529	18274.5	1313.73	117.647	549.02	333.333
200191	174429	11263.7	604.396	54.9451	560.44	384.615
200192	364595	10459.5	729.73	216.216	54.0541	783.784
200193	819667	6222.22	809.524	63.4921	0	126.984
200194	133667	4757.58	727.273	151.515	0	121.212
200195	542474	41052.6	1894.74	368.421	210.526	421.053
200196	101157	4167.91	981.343	14.9254	3.73134	5026.12
200197	283000	17851.1	2425.53	212.766	446.809	340.426
200198	228021	11500	270.833	125	604.167	729.167
200199	153904	12308.5	319.149	21.2766	0	659.574
200200	251524	19404.8	666.667	142.857	190.476	904.762
200201	473742	68580.6	870.968	96.7742	32.2581	1193.55
200202	301078	12019.6	901.961	39.2157	450.98	509.804
200203	197842	12078.9	802.632	26.3158	565.789	407.895
200204	558349	22616.3	2500	267.442	34.8837	697.674
200205	253788	17212.1	1424.24	121.212	636.364	242.424
200206	53965.6	830.688	166.667	0	2.6455	925.926
200207	1.9127e+06	20296.3	7555.56	111.111	666.667	222.222
200208	468409	51363.6	2818.18	136.364	227.273	636.364
200209	286809	8820.22	988.764	11.236	0	0
200210	554571	36285.7	2357.14	785.714	142.857	71.4286
200211	211367	51750	1633.33	650	100	250
200212	158087	31108.7	760.87	43.4783	0	195.652
200213	865500	6815.79	1026.32	26.3158	631.579	342.105
200214	544304	75173.9	956.522	43.4783	43.4783	913.043
200215	199433	2866.67	1822.22	266.667	11.1111	722.222
200216	468569	8019.61	1019.61	78.4314	58.8235	862.745
200217	122286	47797.6	773.81	654.762	59.5238	285.714
200218	275790	8074.07	975.309	0	0	24.6914
200219	247027	28108.1	1459.46	135.135	54.0541	810.811
200220	183434	8452.83	584.906	37.7358	528.302	433.962
200221	331935	45483.9	548.387	193.548	258.065	1193.55
200222	457394	28909.1	1969.7	818.182	121.212	60.6061
200223	103695	8030.53	755.725	114.504	129.771	2167.94
200224	56065.1	2698.22	171.598	0	11.8343	816.568
200225	422900	38250	700	250	50	850
200227	581083	64833.3	2333.33	250	83.3333	666.667
200228	126048	9952.38	603.175	0	158.73	238.095
200229	175725	13025	425	475	100	1100
200230	70204.5	6113.64	954.545	45.4545	22.7273	931.818
200231	140190	11758.6	379.31	482.759	0	137.931
200232	131316	23789.5	342.105	342.105	78.9474	236.842
200233	240049	3259.26	913.58	24.6914	61.7284	0
200234	93222.2	13263.9	236.111	69.4444	0	694.444
200235	193868	20802.6	921.053	131.579	39.4737	828.947
200236	151106	20510.6	680.851	191.489	127.66	702.128
200237	122073	12756.1	780.488	121.951	97.561	804.878
200238	262875	27625	2312.5	875	62.5	62.5
200239	361372	40465.1	558.14	255.814	186.047	4558.14
200240	284235	13823.5	823.529	176.471	0	0
200241	157517	19724.1	1275.86	103.448	103.448	793.103
200242	100303	15590.9	272.727	45.4545	0	681.818

## Sheet: Processed Kraken abund. classes
#ID	Thermococci	Archaeoglobi	Methanobacteria	Methanococci	Thermoplasmata	Halobacteria	Methanomicrobia	Thermoprotei	Nitrososphaeria
1001	86.9565	49.1493	267.801	459.987	136.106	10024.2	904.012	3263.6	526.36
1002	373.537	38.6768	287.532	208.651	781.17	20622.4	1612.72	14201	91.6031
1003	245.918	47.9888	15629.6	125.846	500.796	12807.4	945.44	5875.15	79.4504
1004	177.215	75.9494	385.213	204.833	441.887	19286.2	1083.72	12964.9	156.789
1005	244.681	47.3888	329.787	207.93	382.012	15387.8	914.894	8393.62	170.213
1006	106.62	44.9477	288.85	540.767	266.202	14408.7	708.362	3535.19	293.38
1007	173.118	28.4985	5231.82	203.743	443.216	16320.7	1080.82	7275.2	151.425
1008	114.86	40.9189	343.144	376.167	372.577	21856.4	620.962	2034.46	128.5
1009	202.236	57.2552	31113.4	141.049	467.379	10965.4	863.62	3421.8	132.08
2001	215.655	50.2986	348.004	334.486	399.56	15337	1136.75	323.169	76.3911
2002	262.019	6.00962	360.577	368.99	170.673	79686.3	1894.23	2286.06	200.721
2003	227.576	25.2039	207.561	354.337	621.201	15483.8	1621.94	426.242	185.322
2004	350.624	51.8732	227.185	139.289	514.89	20365	1977.43	814.121	231.028
2005	194.722	43.6111	1093.89	315.278	324.722	17341.1	715	368.056	121.667
2006	316.673	17.2061	248.259	510.856	335.518	22672.3	1494.06	1165.51	82.3433
2007	164.36	36.7647	359.862	314.879	411.765	17441.6	1270.33	362.024	124.135
2008	237.175	8.35123	496.063	182.534	441.899	16926.5	888.809	599.141	130.041
2009	400.72	40.8552	5020.32	106.901	506.774	13564.8	1344.2	276.672	174.852
10010	251.829	83.5366	316.463	177.439	458.537	14307.9	903.049	8778.66	170.732
10011	166.719	20.4853	258.115	489.757	510.558	17442.8	983.927	6419.48	64.9228
10012	180.632	27.93	256.591	543.722	220.047	18045.4	925.085	3676.85	314.8
10013	282.051	34.1191	828.371	137.51	480.562	16905.9	674.318	6199.96	65.7568
10014	186.934	42.6908	897.585	316.731	275.981	12934.5	440.06	1230.49	177.663
10015	290.017	31.8417	278.83	239.243	606.713	21755.6	1148.88	12274.5	160.069
10016	257.768	32.3851	257.33	144.858	466.958	17390.4	1411.38	10183.4	307.659
10017	341.896	9.04486	198.625	375.904	499.638	24788.7	1209.48	6576.7	74.5297
10018	361.897	37.0876	352.528	138.2	455.007	17367.6	960.765	7864.92	110.287
10019	235.452	24.7492	357.191	483.612	270.903	17622.1	924.415	6381.94	111.706
10020	238.871	286.52	240.125	140.439	751.724	28654.5	1031.35	4694.67	94.0439
10021	301.113	30.4628	384.3	207.381	892.209	27906.9	1674.28	4073.81	76.7428
10022	1226.7	23.015	287.687	384.35	262.371	168404	2315.3	3974.68	42.5777
10023	322.174	15.5264	266.861	299.369	580.786	19936	1928.19	3545.37	96.0699
10024	307.962	53.3683	189.851	246.282	730.971	23705.2	1544.18	3210.85	202.537
10025	352.818	88.7265	301.322	149.617	929.715	20903.6	1660.4	2069.59	107.516
10026	255.933	92.6012	312.238	214.053	543.043	18128.9	1168.92	2232.2	125.174
10027	341.815	38.4061	189.15	274.124	819.011	26515.6	1459.91	3411.43	156.505
10028	91.2527	8.36933	523.758	946.544	217.873	22705.2	497.84	1603.94	184.665
10029	218.44	151.024	2727.69	123.265	437.541	14524.5	857.898	1853.27	69.729
10030	267.084	94.4544	1927.01	121.646	475.671	11544.7	963.864	1333.63	41.1449
10031	311.646	13.0124	295.381	274.561	579.05	36962.3	1645.41	6033.83	105.4
10032	688.649	39.6849	342.574	92.2089	439.16	13974	1142.69	1757.51	86.3729
10033	138.716	366.46	187.578	258.799	657.971	22930	607.867	3436.44	48.4472
10034	326.384	38.821	321.352	209.921	575.126	22301.2	1217.83	2156.72	103.523
10035	406.944	45.1389	240.972	251.389	709.028	28035.4	1918.06	4350.69	55.5556
10036	327.243	31.5615	253.738	274.086	627.492	21282	1579.32	2799.83	113.372
10037	371.237	44.5931	272.018	235.229	448.161	47442.6	2005.57	8304.35	76.9231
10038	307.441	26.1652	269.011	1311.53	221.995	39758.4	1380.21	2448.49	175.388
10039	306.144	49.0449	396.489	155.911	924.109	23211.7	1635.52	2381	92.4109
10040	348.897	54.0454	353.054	153.182	582.028	13032.6	1244.96	1228.01	90.8219
10041	334.972	59.6189	317.148	155.501	853.104	25268.6	1743.09	3430.24	132.76
10042	290.62	42.1356	247.042	253.102	572.583	21641.6	1184.99	2384.13	167.1
10043	208.768	86.4301	6910.23	111.9	517.745	13891.4	942.797	1777.04	75.1566
10044	252.047	58.4795	243.86	234.503	285.38	26712.3	1237.43	4042.11	211.111
10045	557.996	38.6643	165.202	232.865	449.912	60217.9	1501.76	4567.66	113.357
10046	425.766	47.1328	157.895	223.095	783.189	23591.5	1587.2	2835.04	146.112
10047	219.99	26.6198	370.166	876.946	226.017	41547.5	759.417	4149.17	157.207
10048	323.397	24.8419	324.3	156.73	463.415	17897	1458.9	9569.11	170.732
10049	416.076	21.2766	553.783	232.27	287.825	18455.7	699.173	21156.6	42.5532
10050	307.717	60.5666	233.149	260.827	565.614	21214.6	1372.52	10364.7	137.74
10052	232.414	51.3308	239.544	532.319	330.798	30057	1104.56	14270.9	145.913
10053	277.561	30.2439	356.098	271.707	430.244	21945.4	1576.1	6102.93	64.3902
10054	266.163	14.518	186.605	478.513	442.896	19098.7	1162.99	4550.14	89.818
10055	225.917	9.17431	450.688	1502.58	179.759	14693.8	633.601	3733.66	134.461
10056	404.58	48.7886	207.434	271.158	507.136	16450.7	1164.29	5638.23	68.0385
10057	217.178	39.1901	448.726	276.943	356.63	20066.3	805.029	5367.08	110.059
10058	157.626	49.1407	359.291	411.386	295.918	18588.1	748.12	5524.44	138.024
10059	262.585	198.571	297.7	126.476	427.284	15305.8	700.435	7320.07	114.667
10060	355.225	77.6539	313.92	154.069	743.494	18363.1	1403.97	7962	99.1326
10061	357.143	16.1565	199.83	302.721	670.068	20711.7	1257.65	1130.95	124.15
10062	291.298	21.4053	342.95	245.23	425.314	15650.5	933.457	436.017	99.1159
10063	282.329	24.2143	295.209	280.783	420.917	19560.5	1005.15	587.841	117.465
10064	347.258	34.4648	213.055	348.303	843.342	30202.1	2433.94	2423.5	56.9191
10065	166.667	35.7576	4243.03	206.667	464.242	14718.8	801.818	518.182	126.667
10066	262.835	35.5419	206.67	347.521	592.365	18020.2	1250.11	569.109	147.433
10067	256.34	35.8324	269.019	253.583	521.499	19839.6	940.463	885.336	185.226
10068	189.644	104.18	2019.34	225.827	389.894	14486	460.387	683.718	90.4554
10069	228.381	63.2862	33793.2	257.075	581.368	11709.9	672.17	203.223	248.035
10070	344.093	35.2745	177.704	391.015	474.21	20709.2	1086.19	618.968	51.9135
10071	214.157	30.1158	6936.68	178.893	480.824	18929.5	1004.38	569.112	96.0103
10072	201.048	40.0599	202.546	366.155	445.152	17091.7	849.495	1005.62	190.191
10073	227.184	43.818	62684.1	171.365	476.975	12555.1	757.745	576.054	80.6587
10074	198.071	84.817	180161	144.659	526.706	15190.4	1011.37	864.738	45.7468
10075	204.266	43.6328	61354.6	367.162	550.42	15201	902.392	293.471	91.4674
10076	288.507	40.8768	252.962	227.488	638.626	26460.3	1134.48	1285.55	190.166
10077	320.283	40.0943	3163.21	263.208	620.755	18608	1001.89	266.981	109.434
10078	252.43	27.2147	5661.21	302.416	366.565	16354.3	932.241	1362.95	51.3746
10079	427.318	51.3784	161.654	219.298	605.263	28982.5	1369.67	1578.95	140.351
10080	419.806	32.8068	210.207	194.411	780.073	24611.2	1246.66	1419.2	142.77
10081	366.713	60.9643	169.448	303.662	614.511	26551.7	1183.12	1523.88	99.2119
10082	503.84	110.087	166.667	107.527	1003.33	23665.6	1924.48	1168.46	111.879
10083	256.823	44.7102	3615.8	203.795	384.715	16734.1	847.414	387.055	109.956
10084	367.418	38.5615	205.806	303.293	589.255	16710.1	1178.94	445.407	84.922
10086	228.459	34.8021	426.045	261.016	544.204	14010.4	776.873	396.857	78.8661
10087	163.024	130.464	344.49	224.727	446.721	8863.16	620.446	360.2	137.295
10088	297.096	29.0395	374.535	155.622	418.466	21025.3	1688.76	1754.28	143.708
10089	242.493	141.971	233.681	250	660.574	19001.3	933.094	675.914	131.854
10090	265.084	25.3017	411.055	375.633	277.54	19559.8	1284.16	1392.37	56.4422
10091	385.722	171.018	177.411	163.559	590.57	15791.4	1258.92	4316.2	102.291
10092	220.672	52.7693	255.124	317.488	470.999	17848.2	989.533	6717.84	153.947
10093	419.514	17.9641	203.945	209.933	519.197	20156.7	1908.42	11161.3	148.644
10094	203.665	64.4862	251.218	324.519	438.181	15480.9	817.212	4869.4	156.112
10095	335.922	60.1354	18663.7	85.4241	440.462	9475.51	952.609	2139.78	78.0566
10096	254.077	73.3906	318.455	1017.17	272.103	38955.4	1017.17	4831.33	81.9742
10097	215.3	81.2303	347.792	328.076	318.612	20266.6	1179.81	3654.57	56.7823
10098	243.548	41.6129	198.71	338.71	329.032	14879.7	974.194	2000.65	187.097
10099	213.498	36.7984	3573.17	296.931	348.143	14981.5	870.612	1453.79	104.629
20010	234.755	48.0253	461.295	164.297	447.709	20065.4	961.453	487.836	105.213
20011	234.524	32.7126	3747.86	243.08	405.637	13496.5	839.205	465.274	84.0463
20012	269.818	64.6126	13540.5	158.241	3823.21	11194.4	838.468	348.489	158.839
20013	240.477	44.2478	362.062	229.704	417.083	13245.5	966.526	473.259	123.509
20014	278.291	70.4388	688.222	139.145	424.365	15035.2	1061.78	735.566	87.7598
20015	217.464	31.906	16427.4	376.994	260.285	14643.2	731.318	926.952	113.35
20016	216.834	28.3623	10505.9	374.199	258.92	15681.6	802.379	930.467	121.683
20017	229.596	25.1121	10196.4	393.722	231.39	15269.1	782.96	917.489	120.179
20018	222.222	35.2304	7315.27	379.404	233.966	14649.5	741.644	897.019	129.178
20019	287.697	174.763	22011.4	144.479	8856.78	9526.81	888.959	325.552	67.5079
20020	279.115	184.125	19766.4	150.943	8889.39	9583.6	897.202	327.261	58.5556
20021	270.497	166.559	19889.6	169.141	8905.75	9763.07	922.531	335.055	58.7476
20022	290.323	162.555	17933.6	146.743	8567.99	9417.46	839.342	335.231	65.1486
20023	345.875	30.3682	12781.5	67.455	641.763	12582.1	2955.12	335.931	220.371
20024	274.611	34.3853	7495.05	245.878	349.505	12590.2	661.328	439.943	95.6194
20025	339.051	39.781	996.35	189.781	518.248	18011.3	1053.28	313.504	117.883
20026	300.446	38.4615	389.075	188.963	537.904	21136.6	1545.15	1052.4	83.0546
20027	250.589	98.4456	11324.1	135.657	4258.13	11101.7	922.751	398.022	117.287
20028	255.246	106.881	11132.7	121.523	4275.26	11101.5	928.258	405.076	111.274
20029	256.582	101.704	11684.6	123.387	4520.91	11711.9	994.321	409.396	108.931
20030	249.741	103.627	11329.5	123.834	4481.87	11376.2	939.896	400.518	122.28
20031	281.342	123.781	1926.09	127.635	632.283	12781.7	1156.2	320.789	146.452
20032	278.992	31.0924	438.655	226.891	339.496	16091.6	843.697	937.815	123.529
20033	280.509	77.0024	19187	116.879	467.858	11937.4	874.871	440.358	85.2527
20034	226.231	105.529	1981.79	172.286	415.037	13064.4	960.216	1133.51	80.9171
20035	314.117	66.5188	36637.8	160.015	679.231	10618.6	702.143	328.529	130.82
20036	237.848	52.5084	926.956	151.807	430.205	11678.2	757.993	470.496	127.632
20037	228.739	40.7625	15191.5	204.399	432.551	11086.5	711.73	567.742	93.5484
20038	249.278	54.4733	1638.17	153.68	423.882	14365.8	918.11	443.362	118.687
20039	302.345	17.016	448.018	205.437	322.474	13875.7	756.173	450.093	152.729
20040	342.418	32.2581	520.022	116.055	325.362	14124.4	1163.14	365.406	183.908
20041	279.819	145.068	23708.6	165.7	466.151	12112.2	878.143	321.728	87.6854
20042	295.812	133.508	23142	158.377	480.366	11927.4	862.565	335.079	77.2251
20043	296.966	134.28	22697.9	150.42	442.221	11595.2	887.024	336.346	81.9884
20044	288.997	151.114	23719.4	155.292	513.928	12096.8	848.189	314.763	89.8329
20045	244.048	34.7744	2728.7	226.504	364.035	13295.4	1040.41	681.704	130.639
20046	240.942	35.3104	1396.95	206.785	374.567	13000.7	859.22	569.121	142.396
20047	281.283	39.4322	3437.96	145.636	569.401	13552.6	1022.08	446.898	86.7508
20048	213.297	23.4657	5196.75	167.87	409.446	13745.2	1123.35	578.219	185.921
20049	222.98	32.1324	964.946	212.269	416.748	17758.5	1015.58	1344.69	115.871
20050	219.205	34.9176	731.329	179.437	449.079	16508.2	998.06	1283.22	117.362
20051	211.224	28.5714	767.347	214.286	444.898	17274.5	1028.57	1328.57	101.02
20052	222.346	36.8715	729.609	194.413	440.223	18277.1	993.296	1391.06	106.145
20053	173.913	9.47051	497.632	186.827	722.342	14093.4	1032.29	742.144	132.157
20054	281.943	92.1331	1059.4	98.2049	389.916	14794.6	957.497	822.334	137.804
20055	381.69	34.6331	675.224	129.087	4167.84	14471.3	1242.19	327.682	126.907
20056	564.924	77.9933	4936.76	81.3659	505.902	13864.7	2051.43	198.567	136.172
20057	276.541	22.2603	1735.66	148.973	412.671	14220.5	1103.81	517.551	139.555
20058	242.795	41.3392	2706.55	108.588	487.918	11917.9	927.22	703.348	119.36
20059	259.193	47.5336	8214.35	184.753	369.507	12933.6	1224.22	652.018	139.013
20060	278.298	45.9574	4603.4	166.809	385.532	11911.5	1084.26	585.532	123.404
20061	279.487	40.1709	4612.82	162.393	390.598	11961.5	1158.97	578.632	127.35
20062	271.347	42.6945	3723.91	174.573	378.558	12652.8	1117.65	673.624	132.827
20063	248.411	89.5436	624.495	146.736	4083.19	13688.6	931.254	378.972	136.337
20064	259.064	75.4386	514.62	149.123	4141.52	13520.5	866.667	378.947	137.427
20065	246.503	75.7576	483.683	136.364	4103.73	13208.6	839.744	375.291	166.084
20066	246.722	82.2408	423.123	150.775	4141.84	13172.8	825.387	376.043	144.219
20067	233.263	34.7663	1214.24	152.455	458.774	12640.8	1111.11	511.628	120.742
20068	368.827	58.642	313.272	155.478	442.515	13844.9	806.327	598.38	103.781
20069	260.579	48.5523	415.145	169.265	469.042	12949.7	913.14	409.354	112.249
20070	276.446	38.9281	3867.14	174.612	415.797	11515.1	946.403	445.98	94.2172
20071	389.951	12.3177	611.021	182.172	323.501	16435.7	744.246	996.434	92.0583
20072	223.475	21.5274	585.341	260.379	399.795	13789.3	930.292	613.019	94.8232
20073	206.644	16.3288	454.392	266.329	419.482	14484.2	994.932	626.689	91.2162
20074	209.508	22.1117	451.631	275.843	387.507	14124.9	968.491	622.996	105.03
20075	222.757	21.0716	354.606	295.605	417.821	14642.4	973.51	605.659	105.96
20076	316.059	45.5581	465.262	135.535	536.446	13174.8	1056.38	390.661	112.187
20077	330.253	60.9982	346.888	133.087	557.609	13982.1	1131.24	410.351	128.774
20078	328.029	53.2436	349.449	119.951	575.887	13708.7	1072.83	381.885	149.327
20079	383.204	52.9287	303.458	134.086	649.259	15448.8	1187.72	443.896	126.323
20080	220.717	48.951	2855.77	176.573	325.175	11245.6	867.57	522.727	228.584
20081	278.176	61.8893	4303.58	150.814	384.691	13800	1023.13	398.697	124.43
20082	265.862	47.2779	3708.96	117.069	2195.66	11173.6	797.994	443.717	126.074
20083	172.469	53.0262	882.7	104.981	582.217	11423.7	782.003	728.441	87.3058
20084	302.073	46.6321	408.29	135.233	432.124	13679.3	1176.17	455.44	107.772
20085	196.573	43.3468	5297.38	155.242	366.935	13266.1	1045.36	853.831	237.903
20086	232.632	46.3158	4496.84	168.421	314.737	13172.6	1005.26	824.211	237.895
20087	222.222	37.7358	4298.74	138.365	379.455	13410.9	1055.56	828.092	222.222
20088	240.642	34.2246	3610.7	163.636	334.759	13567.9	1016.04	856.684	226.738
100100	172.35	37.8177	318.971	326.72	354.309	14894.6	748.915	357.099	144.141
100101	209.969	53.3171	13906.6	351.858	293.157	10753.6	844.043	442.341	91.6985
100102	223.115	33.5834	559.664	225.616	408.181	12379.2	897.285	438.192	109.503
100103	225.319	49.9089	713.297	239.162	355.373	13225.5	865.574	533.698	130.237
100104	184.698	8.03034	745.706	463.083	324.559	14728.1	976.355	1114.21	19.6297
100105	196.488	27.784	515.226	308.291	367.637	12932.4	911.98	755.279	99.8
100107	246.617	68.9581	13797.6	253.061	1226.42	12215.5	861.01	332.116	99.2481
100108	328.851	56.5846	232.936	263.892	776.199	13124.8	1052.02	287.49	159.097
100109	247.934	31.0543	5501.63	215.126	433.759	14516.7	977.711	413.223	92.6622
100110	220.104	122.617	158775	139.948	875	9076.47	932.626	444.324	73.0069
100111	283.352	46.7475	490.408	228.886	369.791	12697.7	1089.08	451.378	71.2238
100112	155.822	46.9203	261.634	375.555	472.678	11875.8	601.661	423.827	160.07
100113	221.786	30.6944	604.529	245.368	401.273	11823.7	879.094	451.432	100.88
100114	229.712	55.4835	58359.6	308.271	408.089	10829.4	755.509	300.752	105.782
100115	261.481	60.2156	477.038	188.847	577.32	11762.4	1135.19	375.82	113.636
100116	296.494	34.6205	18144.5	253.884	335.331	12012.4	1104.97	480.914	79.6715
100117	284.254	44.9898	589.809	172.631	408.998	9872.7	961.316	437.969	89.1275
100118	232.376	32.0748	9887.74	253.592	433.344	12340.5	918.644	626.629	48.6134
100119	353.454	15.1711	428.664	163.654	536.475	19393.8	1532.6	1652.03	39.0575
100120	132.775	31.4136	1124.82	520.209	318.325	13872.9	916.23	464.293	53.1937
100121	188.086	18.7534	370.656	519.581	349.145	45156.1	856.04	1421.95	73.3591
100122	193.661	12.7561	346.734	796.289	319.289	30679.2	1114.42	698.106	127.561
100123	262.003	36.0099	373.344	275.662	381.623	14637.8	1388.66	1574.92	52.9801
100124	238.428	33.6383	91739.5	139.128	512.648	13484.4	1020.18	804.898	76.1572
100125	241.547	103.725	1330.37	187.393	399.713	13812	1050.43	874.212	67.6218
100126	258.741	74.0623	261.92	268.913	427.527	16930.7	1606.48	519.072	136.364
100127	119.848	62.3644	348.156	317.787	207.701	7714.75	3223.97	636.659	292.299
100128	143.847	24.6674	835.089	426.829	305.987	13758.9	1231.43	543.514	98.6696
100129	297.589	43.1472	206.853	283.629	524.112	22891.5	1430.84	755.076	168.782
100130	300.709	25.5319	1951.77	124.113	304.255	35687.9	1102.13	1163.12	245.39
100131	163.531	44.8625	337.192	835.504	209.841	21854.3	966.233	1741.44	244.573
100132	257.015	219.978	144.781	206.51	250.281	33528.6	1158.25	1708.19	178.451
100133	230.721	36.9906	300.313	500.313	321.003	22403.1	2899.69	2115.99	110.972
100134	238.411	6.20861	445.778	251.242	491.308	14377.5	778.974	959.851	58.3609
100135	184.146	63.4146	380.488	836.585	264.634	24336.6	1060.37	1411.59	107.317
100136	1108.91	76.7327	189.356	282.178	506.188	152015	1116.34	327.97	123.762
100137	306.488	53.6913	222.222	343.028	478.747	16455.6	1404.92	889.635	74.5712
100138	260.795	35.9128	369.816	283.027	308.679	14857.2	1155.19	1454.04	111.586
100139	250.555	41.5371	380.942	179.032	674.367	12539.3	1144.38	423.812	147.934
100140	245.932	45.84	480.633	143.479	573.917	11682.3	1109.1	749.026	84.1164
100141	133.376	17.8265	458.119	560.567	99.012	12108.5	2479.6	438.144	311.641
100142	225.825	28.9519	391.43	420.382	314.418	20941.5	1348	1864.5	39.3746
100143	188.83	53.8056	314.149	327.431	305.466	12476.4	561.042	469.777	137.749
100144	289.696	17.1734	266.892	295.608	365.709	12725.5	996.622	577.703	130.631
100145	219.416	38.0874	379.218	340.923	333.057	13752.8	716.415	307.804	101.635
100146	245.392	22.0455	336.827	287.315	395.374	15946.5	1587.64	808.457	108.421
100147	189.989	56.5984	452.787	436.291	233.788	15189.7	1188.57	1337.03	83.3333
100148	296.857	25.844	260.303	285.914	639.814	14690.8	1115.48	593.248	131.083
100149	323.861	141.287	221.448	206.971	713.137	12663.5	1121.98	540.214	106.434
100150	281.697	60.0716	58312.4	112.219	528.119	12400.1	1109.66	479.294	66.7178
100151	270.304	23.8133	49446.6	193.345	423.435	11203.1	918.625	562.214	89.1027
100152	230.933	33.7993	673.155	246.859	347.018	10379.6	951.867	463.281	141.391
100153	291.047	53.0452	609.318	281.224	444.85	16226.8	1085.88	250.351	124.333
100154	289.717	45.3909	113456	215.467	358.083	13482.8	1077.05	837.209	91.3421
100155	304.164	37.1639	800.474	285.187	302.583	10023.5	828.413	314.707	70.9014
100156	210.491	80.3453	312761	279.991	350.155	10593	923.196	472.333	79.0173
100157	192.498	39.632	22969.2	248.408	390.304	16241	949.045	822.01	129.158
100158	145.006	15.6438	1425.99	435.018	306.558	16019.9	1418.17	1034.9	97.7738
100159	182.614	51.5065	274.634	370.928	602.606	15006.7	1026.87	667.956	120.318
100160	287.284	30.1543	366.76	225.806	430.575	14246.1	1219.5	605.189	89.9953
100161	180.095	42.0078	2452.82	205.084	473.072	10543.9	799.655	605.989	99.7415
100162	249.235	28.4773	9399.39	169.922	436.103	11412.8	1162.16	747.47	116.263
100163	338.581	22.6164	249.224	253.215	585.144	14403.3	1004.66	368.736	136.364
100164	284.453	46.0423	374.645	186.061	475.875	22181.3	1244.72	872.911	108.798
100165	278.471	29.013	1126.08	136.659	468.275	14051.5	1121.75	728.579	87.5813
100166	270.071	41.2181	275.3	264.534	530.298	14376.2	1205.17	534.605	148.877
100167	260.749	37.9363	54854.3	160.344	460.293	22074.6	1118.87	1215.98	80.6778
100171	194.328	28.1134	534.649	301.11	380.764	9817.26	830.58	553.144	95.6843
100172	231.676	72.5269	816.761	311.891	324.705	15152.5	1114.56	1035.11	59.2004
100173	256.684	73.0838	51341.4	233.809	667.558	15033.6	1054.66	334.522	101.901
100174	253.206	15.0867	656.776	224.793	440.282	15117.4	1193.61	1642.7	66.6331
100175	355.101	25.7677	4137.66	200.141	332.51	30071.3	819.273	474.056	86.4808
100176	257.5	25.7692	561.346	250.962	395.192	13665.4	1061.92	962.692	70.5769
100179	229.681	112.119	357.402	257.257	490.566	13045.4	909.289	310.595	90.3483
100182	278.073	33.0046	7486.72	194.992	349.772	13081.9	698.407	408.194	144.158
100183	237.792	43.0536	28584.8	182.579	478.374	14466.6	811.242	748.057	58.2021
100184	250.321	18.6136	210.526	326.701	442.875	21761.2	1020.54	983.954	193.838
100185	365.741	33.2492	223.906	275.253	409.933	29086.7	1452.02	2243.27	101.852
100186	244.786	30.7068	319.525	227.694	492.758	16032.4	794.612	506.663	177.289
100188	217.599	37.3027	309.421	222.382	356.767	16517.5	934.003	614.06	213.295
100189	405.167	98.5724	185.588	280.082	661.455	21401.1	1564.92	1137.32	30.5914
100190	510.7	42.8016	247.082	139.105	568.58	20057.9	997.568	841.44	60.3113
100191	221.406	22.3101	1181.02	286.642	378.142	15667.9	728.89	307.258	162.384
100192	854.973	24.2976	44.7988	98.7092	715.262	30139.7	3152.62	1653.76	116.932
100193	440.987	179.185	121.245	181.33	481.76	21912	1398.07	1931.33	77.2532
100194	647.962	80.5755	81.0552	90.4077	779.616	17986.1	1516.79	1140.05	100
100196	278.33	156.395	353.877	99.4036	743.539	17257.1	970.179	656.064	111.995
100197	250.447	36.9267	321.918	286.48	406.194	22035.1	836.808	329.661	104.229
100198	218.405	9.02708	175.276	564.443	466.399	17124.4	1324.22	919.258	130.893
100199	194.831	19.0855	30428.6	172.763	2520.48	12040.4	915.308	569.384	43.9364
100200	206.671	47.6933	12184.9	310.786	375.935	18624.7	543.641	521.82	58.9152
100203	213.383	30.7807	6949	221.859	416.059	13576.1	768.327	611.747	117.918
100204	171.882	134.108	108979	288.78	418.641	13627.2	666.294	309.343	95.8873
100207	186.984	61.8698	81816.2	310.266	517.415	13639.8	725.481	331.806	109.074
100208	208.451	56.6197	10086.8	308.451	385.634	13170.4	663.662	300	126.479
100210	562.026	57.8381	194.655	63.4224	951.336	22593.5	2239.73	857.599	122.058
100211	229.998	127.846	331.941	249.426	481.512	8742.43	808.648	304.784	87.9465
100212	158.037	26.3959	455.161	503.553	420.643	19125.5	1375.63	171.912	223.012
100213	347.243	42.879	5492.73	141.271	395.1	14561.3	865.237	1325.8	73.5069
100214	244.597	66.1571	279.125	242.752	856.616	13282.3	1238.01	490.775	167.37
100215	205.923	12.957	439.38	572.42	264.924	14555.1	895.187	532.392	76.8163
100216	180.704	35.3589	20436.9	280.384	422.708	11629.5	713.575	439.588	80.8458
100217	265.903	28.8403	239.108	428.922	451.422	18409.5	880.753	345.674	120.475
100218	378.072	102.199	219.922	181.113	885.511	18040.8	1718.63	666.882	118.693
100220	219.296	34.5349	277.358	519.75	608.461	15209.8	1291.17	295.489	173.322
100221	193.47	33.8573	435.308	1149.03	219.77	15845.5	1040.51	1324.97	117.594
100222	1295.64	6.46204	431.341	371.567	142.165	301687	4838.45	988.691	48.4653
100223	230.415	37.6037	10658.4	239.447	412.903	11625.1	988.756	390.23	102.304
100224	286.503	15.0527	360.261	186.653	709.985	23108.9	1037.63	2273.46	151.53
100225	225.174	37.3182	264.39	269.133	206.831	19489.2	992.726	1049.34	266.287
100226	340.065	31.6918	241.417	260.991	509.865	15461.7	714.619	357.775	125.835
100227	286.896	84.6056	267.494	246.819	1030.85	19334.3	1730.6	743.003	114.186
100228	221.639	24.9475	8470.06	305.935	374.475	13892.1	755.515	941.439	73.0042
100229	174.512	36.4121	402.309	388.099	317.052	17207.8	1468.03	1534.64	83.9254
100230	296.613	27.4641	339.64	220.018	276.472	27272.8	1094.9	318.279	179.432
100231	217.659	38.1018	2211.04	274.013	359.799	12223.6	729.181	465.206	110.427
100232	328.492	53.8232	258.009	216.147	573.686	33649.7	1334.9	489.107	143.528
100233	246.71	33.0579	727.885	289.562	662.994	14304.9	1319.56	301.806	128.864
100234	195.297	32.2086	831.8	266.36	317.485	12967.8	1025.05	830.777	188.65
100235	407.46	21.9248	1462.98	262.528	430.524	18476.1	1066.91	189.351	118.736
100236	224.61	54.2719	273.509	382.59	523.912	23894.1	1482	1081.14	65.0188
100237	240.145	22.0105	326.544	274.967	636.334	16693.8	954.008	329.829	136.334
100238	376.19	38.8278	209.158	263.37	523.077	15608.8	1517.22	701.465	112.454
100239	236.125	33.4018	366.65	229.959	639.26	16158	1259.76	710.432	133.864
100241	236.244	68.9844	8431.43	210.786	416.37	13434.7	972.078	616.753	67.6157
100242	256.934	42.1079	304.841	341.654	644.982	13591.3	1846.7	258.699	137.418
100243	251.234	36.7878	321.669	279.049	355.765	15621.8	718.708	1217.14	111.261
100244	223.636	26.9697	305.152	418.788	345.152	15254.5	839.394	390.303	99.0909
100245	168.646	16.0333	508.314	790.38	251.781	19172.2	2109.86	1691.81	55.2257
100246	216.562	32.8733	303.639	339.774	306.901	9458.97	2422.84	257.967	188.959
100247	244.905	38.2096	303.311	372.999	311.499	11259.8	822.234	393.195	102.074
100248	205.087	34.3721	368.928	304.766	341.43	11253.4	1833.87	361.137	114.345
100249	258.681	37.7604	300.781	311.632	615.017	39392.4	1219.18	564.67	91.1458
100250	260.404	46.8176	361.383	247.858	374.541	12973.7	1019.89	1058.45	83.5373
100251	294.748	53.0547	285.906	250.804	565.113	11433	1355.31	639.603	115.488
100252	401.981	42.0082	262.978	204.235	423.156	11741.1	840.164	665.984	88.7978
100253	225.292	66.9386	6580.75	223.809	3706.84	9510.11	780.642	409.976	73.9848
100254	188.641	27.3834	349.899	350.237	362.745	12926.3	1565.92	697.769	83.8404
100255	250.076	34.5559	297.666	307.972	419.218	15341.6	1010.91	919.37	109.73
100256	579.921	33.0251	410.832	201.453	538.97	63372.5	1227.21	267.503	87.1863
100257	290.981	43.0081	29149.7	208.651	382.404	11600.9	1361.27	496.191	74.957
100258	327.736	70.5846	309.391	212.687	739.428	13572.8	1106.97	372.201	79.602
100259	222.833	103.672	335.249	236.573	326.505	10459.7	647.514	517.362	110.417
100260	248.955	45.23	317.37	381.224	532.877	11261.9	1260.74	296.085	92.3603
100261	278.842	43.9047	325.082	235.404	478.748	14542.7	1169.08	970.107	116.768
100262	174.08	36.9728	238.976	369.921	314.462	13413.6	603.89	337.955	235.509
200183	315.444	37.2399	4792.99	95.2903	503.834	12113.9	742.607	663.746	48.1928
200184	271.084	39.1566	1274.1	159.639	481.928	19792.2	1129.52	2090.36	48.1928
200185	189.691	28.866	2111.34	354.639	364.948	11666	1360.82	1311.34	61.8557
200186	276.923	58.4615	8064.62	116.923	523.077	13513.8	750.769	746.154	24.6154
200187	296.099	26.5957	379.433	207.447	843.972	19281.9	1351.06	758.865	90.4255
200188	464.912	8.77193	13947.4	153.509	298.246	33473.7	1833.33	3776.32	74.5614
200189	400	28.0702	1515.79	161.404	347.368	67122.8	1350.88	2726.32	63.1579
200190	338.438	16.8453	1810.11	120.98	456.355	13301.7	693.721	1427.26	67.3813
200191	378.531	32.0151	8585.69	148.776	372.881	19047.1	964.218	1930.32	67.7966
200192	365.672	22.3881	294.776	268.657	544.776	46462.7	1585.82	1444.03	48.5075
200193	199.557	62.0843	101723	115.299	886.918	9880.27	600.887	869.18	22.1729
200194	400	22.8571	420	85.7143	531.429	21394.3	1111.43	897.143	71.4286
200195	317.195	51.7529	609.349	76.7947	510.851	14262.1	1163.61	1302.17	43.4057
200196	365.079	0	313.492	305.556	58.2011	29968.3	2383.6	1477.51	322.751
200197	228.879	29.1859	2731.18	219.662	410.138	15502.3	784.946	1288.79	112.135
200198	384.181	67.7966	29033.9	112.994	395.48	29791	1548.02	3118.64	39.548
200199	284.238	2.58398	2323	242.894	413.437	32276.5	1315.25	2989.66	56.8475
200200	408.56	31.1284	12972.8	159.533	322.957	25291.8	1338.52	3171.21	77.821
200201	155.756	9.02935	1300.23	146.727	641.084	29546.3	1103.84	4799.1	47.4041
200202	276.342	83.499	13884.7	85.4871	514.911	14198.8	948.31	1218.69	39.7614
200203	409.253	46.2633	7016.01	122.776	359.431	17718.9	779.359	1633.45	62.2776
200204	343.805	18.3246	394.415	123.037	437.173	38556.7	1057.59	1697.21	120.419
200205	318.095	20.9524	2746.67	91.4286	537.143	10912.4	681.905	1081.9	32.381
200206	369.186	8.72093	918.605	319.767	229.651	54540.7	1215.12	912.791	72.6744
200207	202.582	33.7637	42282	133.069	813.307	6807.35	673.287	544.191	86.3952
200208	891.753	5.15464	67.0103	190.722	448.454	48469.1	1860.82	5824.74	288.66
200209	574.85	0	161.677	137.725	1203.59	144251	2526.95	4700.6	125.749
200210	266.187	16.7866	3868.11	160.671	520.384	12601.9	714.628	1218.23	35.9712
200211	381.633	10.2041	6465.31	218.367	320.408	16875.5	906.122	6336.73	69.3878
200212	294.118	58.8235	8503.27	111.111	522.876	36228.8	1607.84	9352.94	13.0719
200213	212.121	84.8485	180818	103.03	430.303	16248.5	1206.06	1569.7	169.697
200214	134.921	5.29101	1605.82	198.413	632.275	29206.3	1105.82	4574.07	29.1005
200215	320.186	18.5615	125.29	259.861	503.48	38587	883.991	598.608	276.102
200216	270.642	29.052	22321.1	137.615	519.878	11833.3	928.135	625.382	42.8135
200217	278.049	2.43902	4914.63	390.244	185.366	15722	3036.59	9792.68	143.902
200218	629.032	8.06452	88.7097	185.484	1298.39	170532	2919.35	5274.19	88.7097
200219	810.651	17.7515	124.26	319.527	272.189	48970.4	2136.09	6153.85	266.272
200220	253.061	65.3061	17502	126.531	461.224	19640.8	1057.14	1828.57	93.8776
200221	293.151	41.0959	4071.23	95.8904	545.205	21753.4	1115.07	3863.01	24.6575
200222	250	37.8788	17194.4	214.646	441.919	18676.8	1030.3	2409.09	55.5556
200223	239.08	20.6897	4432.18	310.345	236.782	23227.6	1643.68	2418.39	193.103
200224	394.558	13.6054	292.517	435.374	210.884	58415	2224.49	3102.04	88.4354
200225	410.891	108.911	18732.7	94.0594	346.535	20579.2	1425.74	3787.13	39.604
200227	223.464	22.3464	1351.96	229.05	391.061	34173.2	2044.69	4346.37	134.078
200228	439.276	15.5039	3219.64	139.535	346.253	15364.3	684.755	1620.16	59.4315
200229	327.014	66.3507	374.408	189.573	611.374	29383.9	1696.68	2469.19	42.654
200230	269.565	4.34783	2978.26	226.087	404.348	20660.9	1647.83	2339.13	95.6522
200231	305.476	17.2911	3769.45	219.02	423.631	17311.2	916.427	1965.42	34.5821
200232	299.465	42.7807	3754.01	139.037	486.631	20545.5	1101.6	4834.22	32.0856
200233	161.589	30.4636	43308.6	116.556	723.179	6221.19	602.649	699.338	88.7417
200234	192.118	0	2004.93	192.118	546.798	28438.4	1133	4704.43	68.9655
200235	255.537	10.2215	1991.48	311.755	361.158	20582.6	1165.25	2693.36	61.3288
200236	208.661	5.90551	834.646	139.764	631.89	11387.8	625.984	1897.64	19.685
200237	331.95	62.2407	593.361	178.423	381.743	17684.6	1261.41	2170.12	45.6432
200238	253.521	18.7793	1192.49	211.268	380.282	16183.1	1413.15	2075.12	136.15
200239	303.097	97.3451	7584.07	159.292	413.717	23836.3	1199.12	3849.56	26.5487
200240	130	10	24950	190	560	21260	840	2350	110
200241	300	63.6364	677.273	177.273	400	17586.4	1322.73	2600	59.0909
200242	458.515	39.3013	209.607	248.908	711.79	25174.7	1646.29	4493.45	43.6681

## Sheet: Processed Kraken abund. species
#ID	Pyrococcus sp. NA2	Pyrococcus sp. ST04	Thermococcus celer	Thermococcus litoralis	Thermococcus peptonophilus	Thermococcus barossii	Thermococcus chitonophagus	Thermococcus barophilus	Thermococcus gorgonarius	Thermococcus pacificus	Thermococcus siculi	Thermococcus guaymasensis	Thermococcus cleftensis	Thermococcus gammatolerans	Thermococcus radiotolerans	Thermococcus nautili	Thermococcus thioreducens	Thermococcus kodakarensis	Thermococcus onnurineus	Thermococcus paralvinellae	Thermococcus eurythermalis	Thermococcus piezophilus	Thermococcus sp. P6	Thermococcus sp. AM4	Thermococcus sp. 4557	Thermococcus sp. EXT12c	Thermococcus sp. IOH1	Thermococcus sp. SY113	Palaeococcus pacificus	Archaeoglobus fulgidus	Archaeoglobus veneficus	Archaeoglobus sulfaticallidus	Ferroglobus placidus	Geoglobus ahangari	Methanopyrus kandleri	Methanobacterium formicicum	Methanobacterium paludis	Methanobacterium lacus	Methanobacterium sp. MB1	Methanobacterium sp. MZ-A1	Methanobrevibacter smithii	Methanobrevibacter ruminantium	Methanobrevibacter millerae	Methanobrevibacter olleyae	Methanobrevibacter sp. AbM4	Methanobrevibacter sp. YE315	Methanosphaera stadtmanae	Methanosphaera sp. BMS	Methanothermobacter wolfeii
1001	11.1821	0	1.59744	14.377	4.79233	1.59744	0	22.3642	15.9744	27.1565	12.7796	0	4.79233	140.575	7.98722	9.58466	11.1821	6.38978	0	0	15.9744	20.7668	73.4824	27.1565	4.79233	14.377	9.58466	71.885	1.59744	332.268	0	3.19489	7.98722	15.9744	4.79233	4.79233	0	38.3387	0	0	471.246	253.994	97.4441	439.297	225.24	0	281.15	3.19489	150.16
1002	53.7634	0	2.48139	14.0612	5.78991	0	1.65426	5.78991	32.2581	1.65426	24.8139	3.30852	0.82713	16.5426	1.65426	0	44.665	10.7527	0	9.92556	9.92556	19.024	4.13565	60.3805	2.48139	26.4682	15.7155	40.5294	1.65426	6.61704	1.65426	4.96278	4.96278	30.6038	19.8511	0	6.61704	28.1224	8.2713	0.82713	78.5773	34.7395	100.083	9.92556	23.9868	4.96278	22.3325	14.0612	110.008
1003	15.1394	15.9363	3.18725	11.1554	7.96813	16.7331	1.59363	2.78884	29.8805	9.56175	19.9203	1.19522	0.796813	16.3347	9.96016	55.3785	20.7171	4.78088	17.9283	14.741	1.19522	11.9522	2.39044	20.7171	5.57769	40.239	4.78088	5.9761	2.78884	17.1315	3.98406	1.19522	50.1992	23.1076	11.5538	8.36653	29.4821	2.39044	31.0757	0	30736.3	33.8645	181.275	45.0199	16.3347	30.2789	7.96813	18.3267	71.3147
1004	11.2161	17.1192	1.18064	23.6128	4.72255	4.72255	2.36128	1.77096	21.2515	0	16.5289	0	0.590319	6.49351	10.6257	11.8064	1.18064	0	2.36128	33.0579	11.8064	6.49351	10.6257	13.5773	13.5773	14.1677	0.590319	10.0354	20.0708	14.758	1.18064	64.3447	2.36128	61.9835	12.987	7.67414	18.2999	3.54191	2.95159	0	43.6836	61.9835	46.0449	39.5514	17.7096	32.4675	36.0094	34.8288	154.664
1005	17.3077	0	0	1.92308	0	0	5.76923	5.76923	50	0	17.3077	0	0	26.9231	3.84615	1.92308	15.3846	1.92308	0	13.4615	13.4615	42.3077	0	57.6923	26.9231	23.0769	13.4615	38.4615	40.3846	63.4615	11.5385	17.3077	0	1.92308	9.61538	5.76923	53.8462	15.3846	25	0	71.1538	176.923	32.6923	53.8462	40.3846	3.84615	1.92308	19.2308	132.692
1006	6.47948	4.31965	2.15983	0	23.7581	0	15.1188	19.4384	170.626	0	10.7991	6.47948	0	19.4384	0	34.5572	2.15983	0	0	66.9546	8.63931	4.31965	2.15983	79.9136	10.7991	6.47948	2.15983	28.0778	17.2786	179.266	8.63931	10.7991	4.31965	75.594	6.47948	0	19.4384	19.4384	23.7581	0	58.3153	82.0734	51.8359	455.724	561.555	181.425	86.3931	10.7991	205.184
1007	2.88462	15.3846	1.92308	0	18.2692	0.961538	0	2.88462	13.4615	6.73077	12.5	0.961538	2.88462	30.7692	6.73077	0.961538	0	0	0	1.92308	22.1154	2.88462	2.88462	20.1923	27.8846	18.2692	0.961538	55.7692	20.1923	34.6154	5.76923	0	13.4615	8.65385	26.9231	2.88462	32.6923	0	3.84615	0	8691.35	79.8077	55.7692	61.5385	34.6154	23.0769	2671.15	3.84615	112.5
1008	2.03252	10.1626	0	52.8455	4.06504	0	2.03252	2.03252	2.03252	20.3252	52.8455	2.03252	2.03252	2.03252	32.5203	4.06504	0	6.09756	0	16.2602	24.3902	0	2.03252	0	0	10.1626	10.1626	22.3577	0	65.0407	10.1626	4.06504	6.09756	16.2602	6.09756	0	69.1057	14.2276	36.5854	0	239.837	79.2683	73.1707	56.9106	117.886	32.5203	32.5203	6.09756	166.667
1009	2.49723	1.10988	7.21421	6.10433	8.87902	5.82686	3.32963	3.88457	13.8735	6.65927	35.2386	2.49723	6.65927	41.343	3.88457	9.71143	4.99445	3.88457	0.277469	8.32408	3.05216	25.8047	4.71698	16.3707	13.0411	28.8568	14.1509	34.9612	6.3818	54.1065	1.94229	8.04661	17.758	44.1176	18.5905	6.3818	9.43396	4.71698	13.8735	0.277469	69796.9	25.5272	27.4695	37.1809	38.5683	103.496	6.65927	17.2031	78.5239
2001	21.1063	11.6448	0	18.1951	3.63901	5.09461	30.5677	0	43.6681	7.27802	39.3013	2.91121	0	7.27802	37.1179	46.5793	5.82242	4.36681	1.4556	0	4.36681	1.4556	3.63901	66.23	0.727802	21.8341	0	10.1892	0	55.313	33.4789	0	2.91121	0	0.727802	13.1004	2.18341	4.36681	44.3959	67.6856	86.6084	77.147	84.425	157.933	23.2897	90.2475	10.1892	3.63901	81.5138
2002	0	5.64972	0	11.2994	84.7458	0	33.8983	5.64972	0	0	0	0	0	39.548	0	5.64972	0	33.8983	112.994	5.64972	0	0	745.763	0	5.64972	0	0	118.644	5.64972	0	0	0	5.64972	11.2994	5.64972	11.2994	11.2994	112.994	0	129.944	175.141	135.593	73.4463	485.876	5.64972	33.8983	186.441	5.64972	288.136
2003	9.91408	35.0297	0.660939	28.4204	80.6345	4.62657	11.236	0.660939	17.8453	0	52.8751	0.660939	2.64375	5.94845	26.4375	10.575	25.7766	0.660939	1.98282	18.5063	10.575	14.5406	0.660939	15.8625	5.94845	44.9438	3.30469	58.8235	1.32188	46.9266	6.60939	1.98282	4.62657	6.60939	1.32188	0	6.60939	17.8453	7.27032	24.4547	101.785	38.9954	71.3814	99.8017	60.8063	19.8282	19.1672	21.15	30.4032
2004	27.4574	1.64745	17.5728	4.94234	6.04064	3.84404	15.9253	2.74574	15.3762	12.0813	38.9896	2.74574	7.68808	12.6304	0	16.4745	1.64745	5.49149	4.94234	4.94234	3.29489	23.6134	7.68808	41.7353	0	29.654	12.0813	7.68808	0.549149	13.7287	0.549149	3.84404	34.0472	6.58979	2.74574	5.49149	3.29489	4.94234	20.8677	49.9725	41.1862	17.0236	10.4338	29.654	23.0643	9.33553	3.84404	10.4338	13.1796
2005	43.3412	7.0922	9.45626	2.36407	89.8345	0	21.2766	1.57604	1.57604	0.788022	26.7928	0	1.57604	15.7604	2.36407	23.6407	0.788022	7.0922	76.4381	5.51615	3.15209	12.6084	9.45626	20.4886	0.788022	37.8251	0.788022	15.7604	0.788022	31.5209	12.6084	3.15209	55.9496	11.0323	11.8203	4.72813	132.388	11.0323	10.2443	25.2167	2567.38	52.0095	50.4334	84.3184	19.7006	7.0922	28.3688	10.2443	20.4886
2006	0	0	1.85185	0	41.6667	0	12.963	1.85185	46.2963	1.85185	8.33333	0	0.925926	87.963	11.1111	11.1111	0	16.6667	52.7778	5.55556	3.7037	38.8889	11.1111	31.4815	9.25926	24.0741	0.925926	28.7037	4.62963	12.963	0	0.925926	3.7037	19.4444	50	0.925926	6.48148	23.1481	25.9259	27.7778	135.185	170.37	30.5556	60.1852	5.55556	12.963	18.5185	8.33333	22.2222
2007	0	0.848896	5.94228	4.24448	8.48896	0	17.8268	0.848896	14.4312	3.39559	84.8896	1.69779	2.54669	7.64007	11.8846	5.94228	1.69779	1.69779	4.24448	6.79117	6.79117	11.8846	2.54669	24.618	2.54669	39.8981	1.69779	3.39559	4.24448	54.3294	6.79117	0	6.79117	0.848896	3.39559	5.09338	43.2937	124.788	16.9779	42.4448	154.499	26.3158	25.4669	56.8761	19.5246	6.79117	15.2801	5.94228	24.618
2008	18.0766	3.61533	0	31.8149	0.723066	6.50759	5.78453	1.44613	114.967	5.78453	60.7375	0.723066	0	21.692	0	53.5069	30.3688	27.4765	8.67679	2.89226	11.5691	13.7383	25.3073	80.2603	7.95372	16.6305	33.9841	35.4302	5.06146	9.39986	0.723066	9.39986	0.723066	2.89226	9.39986	19.5228	20.2458	9.39986	23.1381	0.723066	31.8149	121.475	24.5842	10.1229	5.78453	5.78453	1.44613	8.67679	1206.8
2009	0.966651	2.89995	5.31658	5.31658	19.333	24.1663	2.41663	0	38.1827	28.5162	127.598	1.44998	5.31658	19.8163	13.0498	59.449	40.116	7.24988	18.3664	0.483325	1.9333	11.1165	7.24988	87.4819	0	134.848	24.6496	49.2992	1.44998	34.3161	0.483325	2.41663	9.66651	46.3992	9.66651	15.4664	0.483325	4.83325	20.2997	1.9333	9.18318	3.8666	10.1498	4.83325	0.483325	6.76655	4.83325	3.38328	11365.4
10010	53.1432	64.1607	1.94426	34.9968	4.53662	12.3137	0.648088	0.648088	45.3662	1.29618	22.035	0.648088	1.94426	11.6656	4.53662	8.42515	0.648088	1.94426	5.83279	46.6623	4.53662	17.4984	6.48088	38.2372	9.72132	22.6831	19.4426	15.5541	0	33.7006	4.53662	2.59235	16.8503	119.896	2.59235	5.18471	23.3312	12.9618	9.72132	0.648088	67.4012	116.008	77.1225	110.823	38.8853	19.4426	18.1465	6.48088	152.301
10011	20.9059	0	0	9.29152	6.96864	0	0	16.2602	150.987	0	3.48432	0	0	17.4216	0	1.16144	32.5203	0	0	0	0	0	0	47.619	8.13008	119.628	1.16144	80.1394	12.7758	51.1034	4.64576	1.16144	0	17.4216	1.16144	0	40.6504	38.3275	12.7758	0	109.175	37.1661	88.2695	41.8118	214.866	6.96864	23.2288	16.2602	269.454
10012	21.6771	5.13406	0	0	7.98631	0	0	4.56361	21.1067	8.55676	13.1204	3.99315	0	47.3474	12.5499	10.2681	21.6771	5.70451	9.69766	0.570451	7.41586	18.8249	5.13406	31.3748	1.1409	7.41586	3.4227	53.0519	0	41.0724	2.2818	2.2818	0	15.4022	32.5157	1.1409	18.8249	30.8043	15.4022	0	67.3132	38.2202	20.5362	83.2858	67.3132	16.5431	43.9247	1.1409	103.252
10013	11.8977	25.58	3.5693	24.9851	15.467	14.8721	0	0.594884	44.0214	8.92326	11.8977	2.97442	3.5693	4.16419	2.97442	20.8209	3.5693	0.594884	10.7079	40.4521	12.4926	6.54372	8.92326	45.8061	0.594884	30.934	5.35396	18.4414	5.35396	16.0619	0.594884	21.4158	25.58	33.9084	1.18977	6.54372	24.3902	8.32838	4.16419	0	1660.32	40.4521	36.8828	46.9958	2.37954	10.7079	224.271	29.1493	227.841
10014	14.6561	0	5.63698	2.25479	33.8219	15.7835	3.38219	15.7835	23.6753	0	23.6753	2.25479	1.1274	49.6054	0	1.1274	7.89177	2.25479	0	1.1274	1.1274	52.9876	101.466	81.1725	4.50958	9.01917	7.89177	13.5287	4.50958	130.778	10.1466	2.25479	3.38219	74.4081	41.7136	5.63698	6.76437	58.6246	5.63698	0	2882.75	25.9301	95.8286	25.9301	180.383	0	1197.29	10.1466	140.924
10015	13.9616	1.7452	1.7452	29.6684	3.4904	5.2356	0	3.4904	90.7504	0	15.7068	0	0	15.7068	55.8464	8.726	0	1.7452	1.7452	15.7068	3.4904	66.3176	31.4136	40.1396	0	10.4712	5.2356	10.4712	5.2356	54.1012	3.4904	5.2356	0	1.7452	19.1972	0	10.4712	20.9424	6.9808	1.7452	61.082	113.438	94.2408	45.3752	38.3944	0	15.7068	15.7068	108.202
10016	47.4777	0	1.48368	2.22552	25.9644	0.74184	0	0	13.3531	14.8368	37.092	10.3858	0	2.96736	8.16024	1.48368	27.4481	5.19288	0	0	8.90208	18.546	2.22552	16.3205	8.16024	7.4184	0	35.6083	0	33.3828	9.64392	0	4.45104	7.4184	14.8368	4.45104	10.3858	51.1869	8.16024	0	54.8961	35.6083	21.5134	45.9941	54.1543	9.64392	31.8991	6.67656	89.0208
10017	17.8971	0	0	7.82998	3.3557	0	0	0	34.6756	0	4.47427	0	0	61.5213	173.378	2.23714	3.3557	59.2841	68.2327	33.557	69.3512	238.255	67.1141	15.66	5.59284	1.11857	86.1298	1.11857	3.3557	19.0157	0	5.59284	3.3557	0	41.387	0	2.23714	13.4228	5.59284	0	193.512	8.94855	91.7226	41.387	30.2013	35.7942	8.94855	0	104.027
10018	36.8494	0	7.36988	1.38185	9.67296	22.5702	1.38185	5.98802	29.9401	11.0548	10.1336	29.0189	1.38185	2.30309	2.7637	269	3.68494	6.90926	0.460617	35.0069	11.5154	6.44864	4.60617	16.1216	2.7637	17.0428	31.322	6.44864	20.7278	24.4127	10.5942	4.14556	46.0617	0.460617	3.68494	1.84247	24.8733	5.98802	23.4915	0.460617	34.5463	50.6679	19.8065	58.0378	50.2073	292.031	37.31	42.3768	122.064
10019	49.0798	3.06748	3.06748	0	9.20245	0	3.06748	0	18.4049	0	12.2699	0	6.13497	0	122.699	0	15.3374	15.3374	0	202.454	18.4049	55.2147	9.20245	3.06748	67.4847	3.06748	0	119.632	0	58.2822	0	0	9.20245	42.9448	0	138.037	6.13497	9.20245	0	49.0798	49.0798	184.049	202.454	205.521	153.374	15.3374	156.442	0	328.221
10020	44.1379	30.3448	2.75862	0	34.4828	28.9655	2.75862	1.37931	46.8966	2.75862	4.13793	12.4138	1.37931	4.13793	2.75862	13.7931	1.37931	1.37931	15.1724	8.27586	9.65517	9.65517	24.8276	22.069	11.0345	11.0345	4.13793	15.1724	0	27.5862	0	6.89655	22.069	0	0	2.75862	15.1724	9.65517	1.37931	0	175.172	40	11.0345	70.3448	42.7586	22.069	2.75862	30.3448	81.3793
10021	84.2946	23.9574	8.87311	1.77462	27.5067	28.394	0	2.66193	25.732	6.21118	14.197	1.77462	0	2.66193	0.887311	9.76043	0.887311	1.77462	18.6335	7.9858	8.87311	3.54925	1.77462	15.9716	0	33.7178	0	24.8447	18.6335	26.6193	5.32387	0.887311	2.66193	3.54925	4.43656	23.0701	11.535	107.365	17.7462	0	111.801	41.7036	35.4925	31.0559	122.449	3.54925	0.887311	7.09849	11.535
10022	2.75482	0	0	2.75482	928.375	0	8.26446	30.303	27.5482	0	0	0	0	13.7741	0	38.5675	0	0	815.427	27.5482	0	2.75482	997.245	0	0	16.5289	0	8.26446	0	5.50964	0	0	0	41.3223	13.7741	2.75482	13.7741	8.26446	49.5868	0	27.5482	22.0386	96.4187	71.6253	24.7934	90.9091	55.0964	0	5.50964
10023	240.682	0	1.06496	0	30.8839	0	0	0	25.5591	0	39.4036	0	1.06496	0	0	1.06496	10.6496	0	0	64.9627	13.8445	6.38978	5.32481	63.8978	9.58466	17.0394	0	56.443	0	12.7796	0	2.12993	4.25985	14.9095	0	0	2.12993	10.6496	1.06496	0	39.4036	150.16	50.0532	120.341	12.7796	7.45474	3.19489	1.06496	82.0021
10024	68.75	11.8056	8.33333	6.94444	11.8056	11.1111	4.16667	2.08333	19.4444	0.694444	2.08333	9.02778	6.94444	15.2778	8.33333	9.02778	4.16667	7.63889	13.8889	1.38889	11.1111	6.25	2.77778	41.6667	13.1944	18.75	3.47222	25.6944	24.3056	45.1389	1.38889	4.16667	22.9167	10.4167	5.55556	13.1944	6.94444	10.4167	23.6111	0	61.1111	23.6111	25.6944	21.5278	38.8889	8.33333	4.86111	6.25	7.63889
10025	73.0371	10.3469	10.3469	10.9556	32.8667	15.2161	4.2605	0.608643	96.1656	20.0852	25.563	15.2161	0	5.47778	0	41.9963	4.2605	6.08643	0.608643	23.1284	7.91236	3.04321	2.43457	23.7371	4.86914	13.9988	0.608643	21.3025	0	13.3901	0.608643	7.30371	3.04321	4.86914	16.4334	15.8247	24.9544	9.73828	23.7371	0	37.1272	78.5149	84.6013	64.5161	35.3013	38.3445	3.04321	23.1284	14.6074
10026	7.40192	25.9067	0	1.48038	5.18135	0	0	0	0	0	58.4752	19.245	0	6.66173	4.44115	31.0881	8.88231	2.22058	0	29.6077	0	31.8283	35.5292	3.70096	5.92154	0	0	45.1517	0.740192	64.3967	0	0	30.3479	52.5537	8.88231	0	28.8675	12.5833	16.2842	0	28.8675	78.4604	11.8431	66.6173	27.3871	0	13.3235	53.2939	89.5633
10027	10.6195	0.884956	2.65487	6.19469	5.30973	0.884956	1.76991	3.53982	79.646	19.469	34.5133	4.42478	0	42.4779	8.84956	12.3894	7.9646	3.53982	0	17.6991	7.9646	21.2389	15.9292	72.5664	1.76991	6.19469	3.53982	30.9735	7.9646	26.5487	1.76991	32.7434	5.30973	1.76991	10.6195	11.5044	20.354	23.0088	12.3894	0	46.9027	24.7788	17.6991	25.6637	31.8584	6.19469	8.84956	23.0088	76.1062
10028	6.66032	28.5442	1.90295	7.6118	5.70885	0	0.951475	2.85442	41.8649	0.951475	7.6118	0	1.90295	18.078	5.70885	9.51475	17.1265	1.90295	0	9.51475	11.4177	3.8059	0.951475	59.9429	10.4662	4.75737	0	10.4662	0	17.1265	0	1.90295	0	10.4662	8.56327	0.951475	747.859	65.6518	177.926	0	105.614	80.8754	17.1265	167.46	109.42	159.848	35.2046	19.981	37.1075
10029	6.68003	24.0481	6.01202	18.7041	4.67602	10.02	1.33601	0	33.4001	13.3601	12.6921	5.34402	3.34001	9.35204	1.33601	42.7522	6.01202	8.01603	2.00401	18.7041	1.33601	6.01202	0.668003	17.3681	4.00802	26.0521	8.68403	6.01202	14.6961	14.6961	6.01202	5.34402	18.0361	19.3721	4.67602	6.01202	22.0441	0.668003	32.7321	0	5237.14	15.3641	24.0481	32.0641	26.0521	30.7281	9.35204	11.356	47.4282
10030	29.0828	11.5585	4.84713	5.59284	10.8128	5.9657	0	1.86428	36.9128	6.71141	48.0984	4.10142	8.57569	10.0671	7.08427	10.8128	0.745712	2.98285	12.3043	11.1857	6.33855	12.6771	9.69426	68.9784	4.47427	20.8799	7.82998	29.4556	0	16.4057	1.11857	2.98285	118.195	46.9799	6.33855	8.57569	18.2699	1.49142	5.59284	0	3772.93	17.5242	22.7442	23.1171	11.1857	7.45712	23.1171	17.8971	47.7256
10031	24.4898	0	0	0	16.3265	0	5.44218	1.36054	47.619	0	46.2585	38.0952	0	12.2449	2.72109	76.1905	0	0	0	0	4.08163	62.585	93.8776	85.7143	8.16327	8.16327	0	9.52381	0	6.80272	5.44218	0	8.16327	0	4.08163	13.6054	4.08163	0	4.08163	0	16.3265	146.939	21.7687	14.966	36.7347	57.1429	19.0476	53.0612	174.15
10032	26.7261	24.4989	12.8062	1.67038	4.45434	18.931	1.11359	1.11359	30.0668	5.56793	19.4878	0.556793	7.7951	16.147	4.45434	12.2494	5.01114	0	22.8285	20.6013	7.23831	17.8174	2.78396	17.8174	6.12472	32.8508	10.5791	7.7951	4.45434	16.147	18.931	18.931	11.6927	10.0223	2.22717	7.23831	22.8285	1.11359	13.363	1.67038	36.1915	59.02	34.5212	55.6793	9.46548	20.6013	3.89755	36.7483	108.575
10033	9.375	14.0625	0	4.6875	25	10.9375	0	3.125	59.375	10.9375	10.9375	25	1.5625	17.1875	6.25	39.0625	9.375	0	4.6875	4.6875	17.1875	14.0625	0	50	1.5625	15.625	3.125	18.75	0	17.1875	3.125	0	3.125	59.375	0	1.5625	23.4375	1.5625	12.5	0	67.1875	25	43.75	39.0625	135.938	10.9375	9.375	23.4375	278.125
10034	0	1.9305	1.9305	0	3.861	22.2008	6.75676	1.9305	30.888	0	30.888	5.79151	0	34.749	5.79151	20.2703	0	0.965251	12.5483	0.965251	8.68726	20.2703	10.6178	34.749	11.583	26.0618	1.9305	49.2278	9.65251	27.027	0	10.6178	8.68726	2.89575	14.4788	4.82625	36.6795	6.75676	27.027	0	41.5058	49.2278	13.5135	43.4363	21.2355	9.65251	14.4788	39.5753	69.4981
10035	237.553	0	0	2.84495	17.0697	0	4.26743	1.42248	27.027	24.1821	14.2248	48.3642	1.42248	1.42248	0	14.2248	11.3798	2.84495	0	0	7.11238	7.11238	0	25.6046	1.42248	28.4495	2.84495	66.8563	0	85.3485	0	0	7.11238	0	19.9147	1.42248	48.3642	4.26743	5.6899	0	0	120.91	9.95733	75.3912	81.0811	15.6472	8.53485	51.2091	15.6472
10036	79.8561	13.6691	1.43885	0	27.3381	12.9496	7.19424	2.15827	7.91367	0.719424	43.8849	27.3381	0	22.3022	5.03597	10.7914	5.03597	11.5108	0	13.6691	38.1295	4.31655	1.43885	9.35252	0.719424	25.8993	21.5827	21.5827	0.719424	23.0216	0	3.59712	20.1439	5.03597	0	12.9496	5.03597	20.1439	8.63309	0	21.5827	25.8993	17.2662	91.3669	33.0935	5.7554	10.7914	28.0576	25.8993
10037	24.3902	0	6.09756	0	48.7805	0	0	50.813	18.2927	8.13008	22.3577	24.3902	0	4.06504	0	2.03252	0	6.09756	0	0	2.03252	12.1951	2.03252	6.09756	56.9106	56.9106	40.6504	48.7805	0	8.13008	0	2.03252	2.03252	69.1057	16.2602	32.5203	10.1626	0	6.09756	0	2.03252	34.5528	6.09756	8.13008	22.3577	32.5203	2.03252	10.1626	276.423
10038	0	4.39367	0.878735	10.5448	2.6362	9.66608	10.5448	1.75747	21.0896	5.27241	10.5448	3.51494	2.6362	22.8471	1.75747	36.9069	9.66608	0.878735	6.15114	16.696	7.90861	27.2408	0	21.0896	3.51494	14.9385	0	19.3322	13.181	37.7856	4.39367	4.39367	1.75747	5.27241	4.39367	19.3322	56.239	32.5132	10.5448	0	56.239	62.3902	28.9982	65.9051	33.3919	21.9684	11.4236	7.90861	93.1459
10039	27.1289	3.7679	3.7679	1.50716	4.52148	5.27506	0	0	35.4182	4.52148	33.1575	3.01432	0	2.26074	47.4755	6.02864	0	5.27506	0.75358	70.8365	9.04295	6.78222	6.78222	57.272	0.75358	12.8109	3.7679	19.5931	2.26074	12.0573	1.50716	1.50716	1.50716	53.5041	2.26074	0.75358	80.633	17.3323	15.8252	0	10.5501	40.6933	73.8508	82.8937	2.26074	0.75358	7.5358	30.8968	151.469
10040	8.20569	0.547046	9.29978	1.09409	8.20569	31.1816	0	6.01751	34.4639	4.37637	25.7112	13.1291	5.47046	35.0109	6.01751	6.56455	11.488	2.18818	4.92341	19.6937	6.56455	83.698	7.65864	6.56455	2.73523	42.1225	12.035	6.56455	0.547046	21.8818	0.547046	8.75274	49.2341	7.65864	4.92341	0	8.20569	0	245.624	0	6.01751	18.0525	8.20569	9.84683	26.2582	9.84683	9.29978	9.29978	154.267
10041	95.092	0	9.20245	7.15746	6.13497	1.02249	2.04499	4.08998	32.7198	13.2924	7.15746	10.2249	0	13.2924	7.15746	15.3374	1.02249	2.04499	0	17.3824	13.2924	13.2924	15.3374	7.15746	6.13497	9.20245	0	24.5399	47.0348	19.4274	0	0	7.15746	54.1922	16.3599	37.8323	14.3149	8.17996	26.5849	2.04499	139.059	47.0348	21.4724	44.9898	12.2699	14.3149	27.6074	47.0348	13.2924
10042	20.2514	0	0.698324	17.4581	6.98324	0	3.49162	17.4581	90.0838	0	81.0056	0	0.698324	27.2346	2.09497	16.0615	17.4581	4.88827	0	3.49162	11.8715	33.5196	20.2514	127.095	12.5698	31.4246	6.98324	50.9777	2.7933	71.9274	9.77654	2.09497	11.1732	2.09497	0	5.58659	16.7598	40.5028	42.5978	0	111.034	41.8994	42.5978	68.4358	64.9441	7.68156	20.2514	4.18994	38.4078
10043	5.70033	31.759	7.32899	3.25733	23.6156	6.51466	0.814332	0.814332	8.14332	6.51466	13.8436	0.814332	24.43	17.9153	2.443	34.202	4.07166	3.25733	15.4723	0	27.6873	5.70033	12.215	8.95765	0	17.9153	16.2866	4.88599	0.814332	15.4723	0	88.7622	37.4593	26.873	4.88599	9.77199	4.07166	0	7.32899	0	13194.6	24.43	61.0749	44.7883	12.215	5.70033	78.9902	8.14332	13.8436
10044	39.4973	3.59066	1.79533	3.59066	12.5673	0	0	0	68.2226	0	21.544	0	0	39.4973	25.1346	50.2693	25.1346	0	0	0	0	7.18133	8.97666	165.171	64.632	12.5673	1.79533	73.6086	0	134.65	0	0	10.772	34.1113	0	0	26.93	73.6086	19.7487	0	229.803	23.3393	104.129	66.4273	77.1993	32.316	26.93	7.18133	17.9533
10045	45.1505	0	0	0	31.7726	0	0	43.4783	31.7726	0	25.0836	0	1.67224	11.7057	0	0	5.01672	0	1.67224	0	30.1003	15.0502	521.739	53.5117	21.7391	5.01672	0	23.4114	0	13.3779	0	0	0	58.5284	0	18.3946	1.67224	10.0334	3.34448	0	30.1003	8.3612	46.8227	38.4615	23.4114	10.0334	8.3612	0	33.4448
10046	57.5442	1.81242	17.671	1.81242	7.24966	17.2179	0	1.81242	37.1545	8.15587	10.8745	0	5.89035	18.1242	0.906208	19.0304	3.17173	10.8745	8.60897	1.81242	15.4055	24.4676	15.8586	13.14	2.26552	32.6235	3.62483	23.1083	0	17.2179	0	15.4055	9.96828	4.53104	9.51518	0.453104	8.60897	0.906208	20.3897	0	4.98414	38.5138	11.7807	25.8269	21.2959	1.35931	15.4055	2.71862	4.98414
10047	25.3623	0	0	14.4928	7.24638	0	170.29	47.1014	0	0	3.62319	10.8696	0	10.8696	0	3.62319	0	0	0	0	0	25.3623	7.24638	0	18.1159	18.1159	0	28.9855	3.62319	119.565	0	0	7.24638	25.3623	0	10.8696	0	32.6087	3.62319	0	304.348	239.13	61.5942	278.986	1047.1	101.449	32.6087	0	25.3623
10048	278.523	7.82998	3.3557	6.71141	21.2528	5.59284	0	1.11857	51.4541	0	14.5414	1.11857	0	12.3043	0	0	35.7942	4.47427	0	0	17.8971	6.71141	13.4228	62.6398	22.3714	8.94855	0	34.6756	0	44.7427	0	2.23714	2.23714	10.0671	4.47427	1.11857	101.79	29.0828	0	1.11857	128.635	53.6913	72.7069	95.0783	34.6756	39.1499	29.0828	3.3557	189.038
10049	57.1992	23.6686	0	45.3649	0	885.602	1.97239	43.3925	5.91716	5.91716	15.7791	21.6963	1.97239	1.97239	3.94477	25.641	3.94477	17.7515	0	3.94477	67.0611	31.5582	0	21.6963	15.7791	7.88955	9.86193	5.91716	5.91716	61.144	3.94477	0	3.94477	0	1.97239	9.86193	21.6963	47.3373	11.8343	0	169.625	71.0059	39.4477	213.018	65.0888	41.4201	13.8067	23.6686	1076.92
10050	52.1251	0.801925	0	44.9078	21.652	0.801925	0.801925	76.1828	118.685	0	25.6616	0	0.801925	12.8308	23.2558	7.21732	5.61347	0	8.82117	64.154	7.21732	31.2751	7.21732	16.0385	24.0577	13.6327	16.8404	30.4731	1.60385	73.7771	1.60385	0.801925	0.801925	70.5694	0.801925	81.7963	7.21732	4.00962	2.40577	0	44.9078	72.9751	12.0289	68.9655	20.85	4.81155	9.6231	52.1251	179.631
10052	4.30108	0	2.15054	16.129	32.2581	27.957	0	1.07527	12.9032	0	3.22581	2.15054	0	21.5054	0	17.2043	6.45161	0	13.9785	2.15054	6.45161	10.7527	6.45161	101.075	0	23.6559	9.67742	55.914	0	32.2581	9.67742	25.8065	3.22581	6.45161	1.07527	3.22581	46.2366	74.1935	4.30108	0	13.9785	27.957	111.828	43.0108	24.7312	7.52688	15.0538	13.9785	140.86
10053	115.839	4.72813	0	7.0922	0	2.36407	30.7329	4.72813	2.36407	141.844	0	0	0	26.0047	49.6454	186.761	146.572	0	7.0922	0	4.72813	104.019	0	0	14.1844	0	0	354.61	0	92.1986	0	40.1891	4.72813	9.45626	2.36407	2.36407	7.0922	52.0095	189.125	61.4657	122.931	510.638	125.296	82.7423	132.388	191.489	30.7329	4.72813	104.019
10054	0	3.04569	0	41.6244	0	0	0.507614	0	34.5178	0	7.1066	0	0	6.59898	84.7716	23.8579	0	0	0.507614	40.1015	0.507614	179.188	32.9949	65.9898	0	0	149.746	20.3046	0.507614	2.53807	1.01523	1.01523	0	32.4873	0	20.8122	1.52284	0.507614	26.9036	0	35.533	60.4061	39.5939	58.3756	50.2538	30.9645	49.7462	33.5025	55.8376
10055	1245.37	4.62963	0	0	4.62963	0	23.1481	23.1481	4.62963	0	4.62963	4.62963	0	115.741	13.8889	4.62963	0	0	4.62963	1634.26	0	0	13.8889	0	4.62963	0	0	13.8889	106.481	74.0741	55.5556	0	0	4.62963	4.62963	0	4.62963	50.9259	32.4074	0	412.037	27.7778	175.926	1490.74	4208.33	55.5556	263.889	23.1481	370.37
10056	10.8992	12.9428	2.7248	7.49319	3.40599	1.3624	0	4.76839	27.248	14.3052	2.7248	2.7248	0.681199	63.3515	6.13079	6.81199	30.654	0	0	4.08719	27.248	34.7411	5.44959	27.248	30.654	15.6676	1.3624	48.3651	0	57.2207	0	2.0436	1.3624	12.9428	17.7112	1.3624	35.4223	21.7984	6.81199	0	20.436	59.9455	23.1608	74.9319	80.3815	6.13079	2.0436	0	75.6131
10057	4.55927	0.759878	0	35.7143	2.27964	0.759878	3.79939	0.759878	28.8754	0	0.759878	0	0	5.31915	14.4377	20.5167	9.11854	0	0	66.1094	0	12.9179	7.59878	58.5106	9.87842	35.7143	13.6778	46.3526	30.3951	47.8723	11.3982	2.27964	0.759878	27.3556	3.03951	25.8359	133.739	56.9909	27.3556	0	85.1064	178.571	50.9119	242.401	47.1125	41.0334	12.9179	36.4742	58.5106
10058	0	64.8438	3.90625	10.9375	22.6562	0.78125	0.78125	3.125	27.3438	7.03125	3.125	11.7188	0	17.9688	14.8438	8.59375	7.03125	2.34375	0	10.9375	14.8438	9.375	14.0625	44.5312	6.25	7.03125	0	35.1562	3.90625	64.8438	0	10.1562	17.9688	20.3125	2.34375	23.4375	53.125	50	10.1562	0	142.969	37.5	96.0938	180.469	32.0312	72.6562	167.188	3.125	60.9375
10059	63.5514	7.47664	3.73832	65.4206	8.41121	2.80374	0	3.73832	41.1215	6.54206	4.6729	13.0841	0	6.54206	2.80374	8.41121	5.60748	0.934579	2.80374	143.925	2.80374	6.54206	3.73832	51.4019	0	6.54206	2.80374	14.0187	33.6449	7.47664	4.6729	0.934579	25.2336	272.897	2.80374	5.60748	91.5888	4.6729	3.73832	0	112.15	134.579	78.5047	116.822	23.3645	25.2336	90.6542	14.0187	112.15
10060	59.9209	22.6116	5.08762	18.0893	2.82646	3.39175	2.26116	3.39175	59.3556	6.2182	27.6993	1.13058	0	11.8711	2.26116	6.78349	35.048	2.26116	7.34878	15.8282	1.69587	7.34878	0.565291	33.9175	0.565291	18.6546	2.82646	20.3505	3.95704	37.8745	5.08762	18.0893	3.95704	40.701	13.567	5.08762	31.091	10.1752	6.2182	0	36.7439	94.9689	16.3934	62.7473	1.69587	16.3934	31.091	27.134	48.615
10061	22.0207	0	0	2.59067	19.4301	12.9534	2.59067	7.77202	22.0207	20.7254	41.4508	0	5.18135	55.6995	19.4301	18.1347	9.06736	3.88601	5.18135	6.47668	5.18135	18.1347	19.4301	16.8394	1.29534	9.06736	10.3627	40.1554	0	12.9534	3.88601	0	7.77202	0	0	9.06736	12.9534	1.29534	24.6114	0	11.658	51.8135	12.9534	88.0829	27.2021	2.59067	3.88601	9.06736	5.18135
10062	13.624	25.4314	0	40.8719	27.248	20.8901	0	8.17439	43.5967	8.17439	29.9728	0	0	11.8074	7.26612	11.8074	41.7802	2.7248	1.81653	62.6703	1.81653	8.17439	5.44959	48.1381	8.17439	39.0554	13.624	37.2389	2.7248	24.5232	1.81653	4.54133	3.63306	6.35786	8.17439	21.7984	31.7893	11.8074	44.505	0	73.5695	46.3215	50.8629	115.35	23.6149	53.5876	69.9364	49.9546	49.0463
10063	39.4922	0	0	0	7.05219	1.41044	2.82087	4.23131	64.8801	29.6192	23.9774	2.82087	0	14.1044	33.8505	18.3357	74.7532	1.41044	0	1.41044	1.41044	15.5148	2.82087	31.0296	18.3357	33.8505	39.4922	115.656	16.9252	47.9549	8.46262	7.05219	1.41044	1.41044	5.64175	1.41044	22.567	71.9323	29.6192	0	60.6488	157.969	22.567	280.677	67.701	5.64175	5.64175	33.8505	8.46262
10064	100.332	21.5589	9.12106	4.14594	14.9254	3.31675	0	1.65837	39.801	0	26.534	1.65837	0.829187	29.8507	45.6053	17.4129	15.7546	0	0	7.46269	8.29187	20.7297	1.65837	19.0713	5.80431	9.12106	15.7546	19.0713	0	33.9967	1.65837	2.48756	12.4378	3.31675	14.9254	2.48756	8.29187	19.9005	19.0713	0	87.8939	61.3599	43.1177	19.0713	0.829187	5.80431	3.31675	43.1177	7.46269
10065	29.0598	0	0	3.4188	3.4188	1.7094	11.9658	3.4188	11.9658	5.12821	29.0598	1.7094	0	17.094	8.54701	32.4786	42.735	0	0	23.9316	0	8.54701	5.12821	11.9658	23.9316	37.6068	29.0598	37.6068	0	46.1538	13.6752	25.641	5.12821	8.54701	8.54701	15.3846	3.4188	30.7692	11.9658	0	11412	59.8291	100.855	83.7607	51.2821	42.735	27.3504	52.9915	32.4786
10066	15.5979	0.866551	0	5.19931	10.3986	2.59965	0	3.4662	10.3986	32.0624	33.7955	0.866551	0	56.3258	35.5286	3.4662	6.06586	25.13	0.866551	19.0641	1.7331	17.331	13.8648	25.9965	41.5945	51.1265	12.1317	30.3293	0	34.662	1.7331	5.19931	10.3986	9.53206	4.33276	5.19931	29.4627	21.6638	21.6638	0	106.586	32.0624	30.3293	71.0572	23.3969	9.53206	14.7314	13.8648	3.4662
10067	23.3546	1.06157	4.24628	0	3.18471	15.9236	0	10.6157	31.8471	5.30786	21.2314	2.12314	0	7.431	1.06157	4.24628	32.9087	3.18471	5.30786	8.49257	3.18471	9.55414	2.12314	46.7091	12.7389	28.6624	3.18471	63.6943	14.862	19.1083	2.12314	28.6624	5.30786	12.7389	2.12314	1.06157	13.8004	24.4161	38.2166	0	53.0786	49.8938	80.6794	107.219	58.3864	4.24628	10.6157	29.724	10.6157
10068	11.1857	0	0	13.4228	2.23714	0	6.71141	13.4228	98.434	26.8456	31.3199	0	0	89.4855	6.71141	11.1857	49.217	0	0	20.1342	2.23714	11.1857	2.23714	53.6913	6.71141	76.0626	8.94855	33.557	0	26.8456	2.23714	22.3714	0	13.4228	4.47427	2.23714	15.66	17.8971	24.6085	0	6762.86	44.7427	46.9799	158.837	35.7942	53.6913	6.71141	11.1857	22.3714
10069	32.2284	0.92081	3.68324	47.8821	9.2081	2.76243	0	25.7827	19.337	4.60405	28.5451	9.2081	0	6.44567	0.92081	7.36648	11.9705	0	3.68324	101.289	1.84162	9.2081	6.44567	28.5451	4.60405	34.07	23.9411	37.7532	0.92081	19.337	4.60405	18.4162	14.733	59.8527	2.76243	18.4162	26.7035	0.92081	30.3867	0	78210.9	95.7643	115.101	145.488	27.6243	148.25	148.25	103.131	7.36648
10070	22.5315	0	14.5792	0.662691	62.2929	17.8926	0	0	23.1942	5.30152	21.8688	3.31345	2.65076	84.8244	11.2657	19.218	53.6779	1.98807	12.5911	3.31345	10.603	13.2538	2.65076	11.2657	5.96421	28.4957	110.007	67.5944	0	10.603	0.662691	0	3.97614	54.3406	71.5706	1.32538	17.23	8.61498	40.4241	0	23.1942	56.3287	14.5792	101.392	20.5434	1.32538	16.5673	23.1942	3.31345
10071	14.2566	0	1.01833	4.58248	17.3116	0.509165	0.509165	14.2566	17.8208	10.6925	19.3483	0	0.509165	19.3483	19.8574	11.7108	7.12831	0	14.7658	17.3116	3.56415	15.2749	9.16497	13.2383	12.22	24.4399	7.63747	19.3483	1.01833	19.8574	2.54582	12.7291	3.05499	21.3849	6.61914	16.2933	26.4766	7.12831	14.7658	0	13373.2	35.6415	39.7149	70.2648	22.4033	34.1141	6.10998	17.8208	7.12831
10072	26.9828	0	0.817661	8.99428	17.1709	2.45298	0	3.27065	8.99428	12.2649	5.72363	13.0826	0	48.242	14.7179	4.90597	17.1709	2.45298	0	19.6239	5.72363	17.1709	2.45298	24.5298	23.7122	15.5356	13.0826	35.1594	0	53.148	4.08831	13.9002	4.90597	11.4473	19.6239	4.08831	53.148	28.6182	43.3361	0	48.242	49.8774	19.6239	58.8716	66.2306	6.54129	15.5356	17.1709	4.08831
10073	5.13113	17.6739	4.561	2.2805	6.27138	3.42075	0.570125	5.13113	15.9635	5.70125	35.3478	6.27138	3.99088	13.683	0	2.2805	7.41163	1.14025	1.14025	13.683	0.570125	10.2623	10.8324	17.6739	2.85063	19.3843	13.1129	23.9453	1.71038	17.6739	1.71038	21.6648	24.5154	21.0946	2.2805	9.69213	5.13113	23.3751	25.6556	0	127062	54.732	113.455	63.854	38.7685	140.251	266.819	70.6956	5.70125
10074	43.5631	1.30039	5.20156	1.30039	5.85176	8.45254	0	3.90117	8.45254	16.2549	5.20156	1.95059	5.20156	24.0572	8.45254	22.7568	3.90117	5.20156	5.85176	4.55137	26.658	54.6164	3.90117	7.15215	0.650195	20.156	24.0572	3.25098	0	31.2094	0	0.650195	182.705	8.45254	24.0572	5.85176	3.90117	6.50195	7.80234	0	472856	11.0533	159.948	35.7607	18.2055	98.8296	3.90117	5.85176	3.90117
10075	1.25945	0.629723	3.14861	1.88917	15.1134	5.03778	0	0.629723	28.9673	9.44584	16.3728	2.51889	6.92695	24.5592	13.8539	16.3728	23.2997	0.629723	22.67	2.51889	17.6322	1.88917	3.77834	16.3728	6.92695	13.8539	2.51889	35.2645	6.92695	27.0781	3.77834	0.629723	34.6348	16.3728	14.4836	15.7431	6.92695	19.5214	3.77834	0	118518	48.4887	155.542	23.9295	20.7809	501.889	4.40806	86.9018	5.66751
10076	9.3633	0.93633	3.74532	7.49064	4.68165	4.68165	1.87266	2.80899	37.4532	18.7266	49.6255	0	1.87266	6.55431	0	3.74532	27.1536	4.68165	0	0	5.61798	4.68165	14.9813	51.4981	13.1086	19.6629	4.68165	55.2434	2.80899	30.8989	6.55431	20.5993	2.80899	2.80899	2.80899	8.42697	15.9176	10.2996	41.1985	0	38.3895	36.5169	17.7903	109.551	40.2622	5.61798	8.42697	29.9625	25.2809
10077	3.125	0.78125	0.78125	4.6875	2.34375	8.59375	1.5625	6.25	16.4062	15.625	47.6562	2.34375	8.59375	11.7188	10.9375	5.46875	28.9062	2.34375	4.6875	17.9688	5.46875	5.46875	5.46875	62.5	17.9688	46.0938	4.6875	53.125	0.78125	38.2812	5.46875	3.125	14.8438	3.90625	2.34375	7.03125	25.7812	31.25	19.5312	0	4716.41	62.5	84.375	94.5312	60.9375	34.375	15.625	24.2188	7.03125
10078	6.55738	1.0929	1.0929	18.5792	7.65027	0	0	4.37158	0	3.27869	0	3.27869	0	168.306	40.4372	8.74317	62.2951	9.83607	4.37158	16.3934	4.37158	10.929	3.27869	39.3443	6.55738	28.4153	54.6448	80.8743	0	52.459	14.2077	28.4153	7.65027	1.0929	88.5246	1.0929	15.3005	49.1803	30.6011	0	21620.8	76.5027	126.776	133.333	40.4372	12.0219	40.4372	6.55738	5.46448
10079	42.9253	1.58983	1.58983	11.1288	6.3593	12.7186	3.17965	4.76948	9.53895	4.76948	69.9523	1.58983	1.58983	7.94913	4.76948	68.3625	15.8983	3.17965	3.17965	12.7186	4.76948	11.1288	3.17965	49.2846	11.1288	68.3625	3.17965	33.3863	4.76948	33.3863	1.58983	3.17965	3.17965	23.8474	6.3593	4.76948	7.94913	0	38.1558	0	25.4372	20.6677	12.7186	17.4881	1.58983	22.2576	1.58983	4.76948	17.4881
10080	23.9006	5.73614	0	9.56023	14.3403	26.7686	0	0	45.8891	0	23.9006	3.82409	2.86807	60.2294	15.2964	7.64818	1.91205	4.78011	1.91205	0	3.82409	5.73614	1.91205	17.2084	14.3403	36.3289	3.82409	13.3843	41.109	25.8126	2.86807	7.64818	12.4283	2.86807	5.73614	1.91205	10.5163	1.91205	22.9446	0	91.7782	12.4283	16.2524	13.3843	18.1644	23.9006	1.91205	11.4723	11.4723
10081	4.90633	0	6.69045	21.4095	6.69045	7.13649	41.0348	0.44603	54.8617	3.12221	56.6459	2.67618	0	58.876	16.5031	5.35236	7.13649	20.5174	34.7904	1.78412	55.7538	7.13649	2.23015	53.5236	20.9634	59.322	23.6396	10.2587	3.12221	63.7823	21.8555	5.35236	1.33809	3.56824	4.01427	3.56824	5.79839	0.892061	69.1347	0	27.2079	34.7904	11.1508	37.0205	66.0125	29.438	2.23015	4.4603	9.81267
10082	90.62	1.58983	18.6804	3.97456	19.0779	7.15421	7.94913	0	70.3498	5.56439	58.8235	0.794913	5.56439	37.3609	6.75676	31.0016	1.19237	1.58983	7.55167	0.794913	40.1431	8.34658	3.57711	57.2337	17.4881	60.8108	7.55167	15.8983	0	22.655	3.97456	6.3593	114.865	19.0779	15.1033	33.3863	1.98728	0.794913	29.8092	0	9.53895	42.5278	8.34658	7.94913	6.3593	7.94913	1.19237	3.17965	10.7313
10083	2.3511	7.83699	1.95925	1.5674	7.83699	11.3636	5.87774	3.9185	14.1066	10.1881	14.1066	1.5674	16.8495	23.1191	5.48589	12.1473	2.3511	15.2821	10.1881	12.5392	9.79624	18.4169	11.7555	9.79624	2.74295	27.8213	10.1881	16.0658	0	21.1599	1.5674	1.17555	25.8621	14.4984	9.01254	4.70219	13.7147	41.5361	30.5643	6.26959	2467.48	185.737	830.721	280.172	329.937	635.58	101.097	20.768	5.09404
10084	50.4	138.4	3.2	29.6	19.2	16.8	12.8	4.8	84	8.8	11.2	3.2	0	1.6	0.8	12	3.2	9.6	48.8	45.6	3.2	3.2	4	30.4	0.8	51.2	0.8	10.4	20	21.6	5.6	2.4	20.8	20.8	0.8	1.6	7.2	22.4	18.4	4	63.2	64	48.8	56.8	8	7.2	14.4	33.6	13.6
10086	24.0752	6.45919	9.39518	4.69759	4.69759	0.587199	5.28479	4.11039	28.1856	8.22079	7.04639	8.22079	3.52319	17.0288	11.1568	28.1856	0	13.5056	0.587199	11.1568	1.7616	42.2783	15.2672	14.68	8.80799	11.744	0.587199	40.5167	0.587199	31.7087	0.587199	20.552	9.98238	9.39518	13.5056	8.80799	8.22079	18.2032	43.4527	7.63359	353.494	27.5984	77.5103	59.8943	22.9008	12.9184	64.0047	25.2496	4.11039
10087	17.4863	4.91803	0.546448	32.7869	2.73224	4.91803	6.01093	3.27869	16.9399	0	13.1148	12.0219	2.73224	11.4754	2.73224	4.91803	5.46448	2.18579	25.6831	58.4699	2.73224	12.0219	6.55738	8.74317	7.10383	24.5902	38.7978	4.37158	0	4.91803	2.18579	2.73224	134.426	166.12	10.3825	16.9399	6.01093	2.18579	11.4754	7.10383	24.0437	46.4481	13.1148	331.148	184.699	46.4481	40.9836	60.1093	2.73224
10088	3.80228	1.90114	1.90114	0	3.80228	15.2091	1.90114	1.90114	20.9125	5.70342	406.844	3.80228	0	53.2319	0	15.2091	1.90114	22.8137	0	0	22.8137	9.5057	1.90114	13.308	15.2091	9.5057	7.60456	15.2091	0	39.924	0	7.60456	9.5057	15.2091	0	5.70342	7.60456	15.2091	22.8137	20.9125	705.323	28.5171	55.1331	32.3194	20.9125	1.90114	5.70342	7.60456	3.80228
10089	9.56938	0	2.39234	3.58852	15.5502	17.9426	11.9617	5.98086	0	11.9617	87.3206	8.37321	1.19617	86.1244	0	71.7703	22.7273	16.7464	0	7.17703	35.8852	142.344	3.58852	0	4.78469	107.656	3.58852	15.5502	1.19617	98.0861	3.58852	0	383.971	8.37321	46.6507	14.3541	8.37321	14.3541	40.6699	19.1388	395.933	44.2584	28.7081	56.2201	147.129	2.39234	5.98086	3.58852	4.78469
10090	213.793	0	0	1.72414	39.6552	12.069	3.44828	5.17241	0	413.793	27.5862	17.2414	0	6.89655	0	0	0	1.72414	0	3.44828	10.3448	210.345	3.44828	13.7931	5.17241	24.1379	0	20.6897	1.72414	86.2069	0	15.5172	5.17241	3.44828	0	12.069	148.276	87.931	5.17241	29.3103	93.1034	687.931	210.345	193.103	103.448	6.89655	75.8621	13.7931	3.44828
10091	12.3826	0.853971	7.68574	2.56191	9.82067	19.2143	0.853971	4.26985	14.0905	15.3715	31.1699	2.56191	8.53971	46.9684	6.40478	32.0239	0	11.5286	11.5286	7.25875	5.55081	25.6191	1.28096	13.6635	20.4953	25.1921	64.0478	5.55081	0	40.1366	0	6.40478	212.639	12.3826	15.3715	14.5175	11.5286	19.6413	16.6524	0	38.0017	10.2477	17.5064	33.7319	20.0683	8.11272	16.2254	12.3826	35.0128
10092	7.87402	9.84252	4.92126	4.92126	2.95276	11.811	5.90551	9.84252	80.7087	1.9685	8.85827	3.93701	0.984252	25.5906	0	19.685	19.685	8.85827	4.92126	1.9685	4.92126	17.7165	10.8268	14.7638	5.90551	8.85827	6.88976	34.4488	27.5591	58.0709	8.85827	11.811	1.9685	7.87402	1.9685	35.4331	17.7165	43.3071	42.3228	0	59.0551	51.1811	38.3858	61.0236	38.3858	11.811	8.85827	14.7638	101.378
10093	51.8962	4.99002	0	0.998004	1.99601	0	0	0	93.8124	0	35.9281	4.99002	0	2.99401	330.339	17.9641	65.8683	0	0	90.8184	0	2.99401	25.9481	150.699	1.99601	18.9621	0	185.629	0	37.9242	0	0.998004	0	7.98403	0	0	102.794	0	56.8862	0	6.98603	102.794	17.9641	116.766	1.99601	1.99601	31.9361	3.99202	84.8303
10094	8.28729	8.83978	2.20994	30.9392	0.552486	4.41989	1.10497	1.10497	37.0166	5.52486	34.8066	2.76243	0	30.3867	12.1547	8.28729	26.5193	0	2.76243	52.4862	1.10497	32.0442	1.10497	15.4696	35.3591	10.4972	2.20994	30.9392	0.552486	71.8232	2.76243	6.62983	1.65746	45.3039	19.8895	16.0221	22.0994	26.5193	6.07735	3.31492	70.7182	69.0608	33.7017	96.1326	29.8343	14.3646	9.94475	64.0884	56.9061
10095	66.3053	14.5955	22.9358	4.58716	1.66806	17.9316	0	0.417014	6.67223	5.42118	8.34028	3.75313	27.1059	22.1018	4.17014	15.0125	7.50626	3.75313	0.417014	0	25.0209	23.3528	20.4337	9.59133	0.834028	17.5146	12.5104	10.0083	0.834028	24.1868	0	17.5146	21.2677	58.799	21.2677	8.7573	6.25521	8.34028	13.3445	0	38690.6	32.9441	97.1643	37.1143	9.17431	34.6122	6.25521	8.7573	78.3987
10096	319.328	0	0	88.2353	2.10084	2.10084	2.10084	88.2353	6.30252	0	23.1092	18.9076	0	12.605	2.10084	4.20168	0	0	0	411.765	4.20168	21.0084	18.9076	6.30252	23.1092	0	4.20168	10.5042	10.5042	10.5042	0	0	2.10084	63.0252	8.40336	14.7059	111.345	0	42.0168	0	176.471	35.7143	16.8067	525.21	415.966	0	31.5126	12.605	161.765
10097	83.7004	0	0	0	2.20264	0	0	4.40529	0	0	6.60793	35.2423	0	37.4449	0	2.20264	0	24.2291	0	0	0	48.4581	0	28.6344	61.674	2.20264	0	55.0661	2.20264	33.0396	0	0	0	107.93	19.8238	0	2.20264	19.8238	0	0	189.427	35.2423	39.6476	167.401	151.982	4.40529	50.6608	70.4846	134.361
10098	55.615	0	2.13904	65.2406	8.55615	1.06952	0	13.9037	68.4492	33.1551	3.20856	0	1.06952	21.3904	37.4332	0	27.8075	6.41711	0	20.3209	0	80.2139	1.06952	97.3262	48.1283	7.48663	6.41711	97.3262	0	80.2139	0	0	0	25.6684	19.2513	0	23.5294	56.6845	11.7647	0	79.1444	106.952	43.8503	62.0321	119.786	4.27807	38.5027	26.738	51.3369
10099	23.9521	14.8125	3.78191	17.0186	8.5093	0.630318	12.2912	1.26064	44.1223	2.52127	17.3338	3.78191	2.20611	12.6064	2.52127	22.0611	6.9335	5.04255	1.26064	13.5518	4.72739	10.4003	9.45477	12.6064	2.20611	25.8431	9.13962	17.9641	3.15159	24.5824	5.04255	3.15159	8.19414	17.0186	8.5093	5.98802	5.98802	3.15159	3.15159	0	5983.61	34.9827	26.4734	39.0797	45.6981	13.867	383.549	24.5824	26.4734
20010	8.24742	4.12371	5.49828	10.9966	13.7457	10.9966	4.811	0	39.1753	0	28.866	1.37457	19.244	11.6838	18.5567	22.6804	10.9966	0.687285	11.6838	5.49828	6.18557	7.56014	9.62199	34.3643	2.74914	68.7285	6.87285	8.93471	10.3093	30.9278	1.37457	0.687285	17.8694	53.6082	14.433	9.62199	5.49828	0.687285	21.9931	1.37457	33.677	8.24742	21.9931	24.055	2.74914	10.9966	11.6838	87.9725	759.45
20011	37.1353	1.98939	0.66313	37.7984	11.9363	2.65252	19.2308	14.5889	87.5332	15.252	7.29443	1.32626	1.32626	17.2414	59.6817	21.8833	5.96817	0.66313	0.66313	31.1671	5.30504	35.1459	0	27.8515	16.5782	25.8621	3.31565	22.5464	16.5782	48.4085	23.2095	6.6313	0	7.29443	11.2732	29.1777	57.6923	54.3767	12.5995	1.32626	580.902	26.5252	101.459	90.1857	13.2626	31.1671	15.252	1.32626	8824.27
20012	16.8478	8.69565	6.52174	7.6087	1.63043	10.3261	0.543478	2.17391	53.2609	16.3043	6.52174	0	7.06522	17.9348	2.17391	14.1304	3.80435	10.8696	8.69565	22.8261	4.8913	15.2174	7.06522	28.2609	11.413	49.4565	4.8913	23.913	4.8913	30.9783	1.08696	11.413	36.413	35.3261	6.52174	15.2174	26.087	3.26087	12.5	0.543478	24094.6	35.8696	26.087	43.4783	21.1957	36.413	13.0435	19.0217	229.348
20013	120.224	3.72787	1.86393	25.1631	3.72787	1.86393	5.5918	13.9795	37.2787	1.86393	24.2311	0.931966	3.72787	1.86393	13.0475	34.4828	13.0475	5.5918	0.931966	38.2106	4.65983	6.52377	3.72787	29.8229	0	37.2787	12.1156	25.1631	2.7959	47.5303	4.65983	11.1836	1.86393	36.3467	0.931966	0	43.8024	4.65983	32.6188	0.931966	79.2171	46.5983	27.027	109.04	62.4418	42.8705	36.3467	28.891	329.916
20014	218.814	0	4.08998	0	4.08998	10.2249	4.08998	0	85.8896	6.13497	61.3497	4.08998	2.04499	0	2.04499	28.6299	28.6299	4.08998	2.04499	2.04499	10.2249	4.08998	12.2699	71.5746	4.08998	231.084	4.08998	81.7996	0	222.904	0	20.4499	0	4.08998	2.04499	8.17996	10.2249	6.13497	204.499	0	28.6299	49.0798	53.1697	51.1247	18.4049	28.6299	12.2699	6.13497	1946.83
20015	33.6449	9.34579	3.73832	1.86916	3.73832	1.86916	3.73832	54.2056	9.34579	1.86916	9.34579	9.34579	0	46.729	0	18.6916	1.86916	5.60748	22.4299	57.9439	18.6916	5.60748	0	42.9907	0	52.3364	5.60748	13.0841	0	9.34579	7.47664	20.5607	22.4299	1.86916	3.73832	13.0841	9.34579	22.4299	65.4206	0	336.449	7.47664	44.8598	140.187	35.514	80.3738	39.2523	46.729	35583.2
20016	51.3393	26.7857	2.23214	0	0	4.46429	4.46429	44.6429	15.625	4.46429	13.3929	6.69643	0	46.875	0	13.3929	2.23214	6.69643	20.0893	53.5714	31.25	8.92857	11.1607	29.0179	0	46.875	17.8571	13.3929	2.23214	20.0893	8.92857	22.3214	11.1607	2.23214	11.1607	29.0179	13.3929	17.8571	60.2679	0	345.982	15.625	55.8036	174.107	35.7143	91.5179	33.4821	35.7143	24540.2
20017	40.708	15.9292	5.30973	0	3.53982	1.76991	3.53982	31.8584	14.1593	0	8.84956	1.76991	0	54.8673	0	15.9292	1.76991	8.84956	24.7788	54.8673	17.6991	7.07965	8.84956	35.3982	0	26.5487	12.3894	14.1593	0	15.9292	5.30973	12.3894	12.3894	0	19.469	8.84956	15.9292	23.0088	60.177	1.76991	281.416	17.6991	26.5487	136.283	23.0088	61.9469	30.0885	42.4779	19256.6
20018	52.0607	15.1844	6.50759	2.1692	4.33839	8.67679	4.33839	54.2299	2.1692	2.1692	6.50759	0	0	36.8764	0	21.692	4.33839	2.1692	23.8612	75.9219	26.0304	6.50759	2.1692	41.2148	4.33839	39.0456	8.67679	6.50759	2.1692	36.8764	8.67679	17.3536	19.5228	0	15.1844	17.3536	13.0152	17.3536	69.4143	2.1692	347.072	4.33839	36.8764	130.152	17.3536	58.5683	36.8764	26.0304	16637.7
20019	6.41711	0	19.2513	0	1.06952	0	1.06952	0	38.5027	18.1818	17.1123	19.2513	6.41711	11.7647	0	44.9198	14.9733	7.48663	11.7647	1.06952	26.738	6.41711	18.1818	9.62567	4.27807	9.62567	19.2513	10.6952	0	33.1551	0	23.5294	170.053	39.5722	10.6952	4.27807	5.34759	14.9733	12.8342	0	26674.9	13.9037	129.412	73.7968	32.0856	75.9358	805.348	17.1123	9367.91
20020	2.27531	2.27531	19.3402	0	0	3.41297	0	1.13766	19.3402	14.7895	11.3766	27.3038	4.55063	12.5142	0	50.0569	15.9272	6.82594	5.68828	5.68828	25.0284	7.96359	36.405	18.2025	11.3766	14.7895	12.5142	7.96359	0	31.8544	3.41297	38.6803	183.163	34.1297	4.55063	0	3.41297	12.5142	13.6519	0	27544.9	15.9272	139.932	60.2958	38.6803	63.7088	807.736	13.6519	5728.1
20021	1.03734	2.07469	20.7469	0	0	1.03734	0	1.03734	39.4191	13.4855	13.4855	23.8589	7.26141	6.22407	0	36.3071	11.4108	7.26141	3.11203	5.18672	28.0083	6.22407	15.5602	19.7095	8.29876	12.4481	11.4108	12.4481	1.03734	34.2324	0	22.8216	156.639	24.8963	13.4855	3.11203	3.11203	14.5228	19.7095	0	25552.9	23.8589	131.743	53.9419	30.083	54.9793	738.589	15.5602	5244.81
20022	3.19829	3.19829	17.0576	0	1.0661	2.1322	1.0661	1.0661	38.3795	10.661	18.1237	24.5203	2.1322	17.0576	3.19829	36.2473	17.0576	4.26439	6.39659	6.39659	37.3134	10.661	19.1898	12.7932	11.7271	4.26439	11.7271	22.3881	0	25.5864	1.0661	28.7846	149.254	39.4456	10.661	2.1322	3.19829	17.0576	18.1237	0	25280.4	10.661	108.742	61.8337	21.322	55.4371	737.74	15.9915	3811.3
20023	2.3245	5.1139	4.1841	5.5788	11.6225	12.0874	2.7894	0	50.2092	25.1046	59.0423	4.1841	4.1841	20.9205	7.4384	9.7629	3.7192	5.5788	11.1576	1.8596	2.7894	18.1311	12.0874	44.6304	1.3947	50.2092	30.6834	33.0079	0	18.596	0.4649	5.5788	15.8066	11.1576	38.1218	21.8503	5.1139	186.89	1.3947	0.4649	755.463	6.5086	2.3245	4.649	0.9298	5.1139	1.8596	2.3245	21099.5
20024	14.5068	21.2766	2.90135	72.5338	5.80271	3.86847	8.70406	7.73694	20.3095	12.5725	14.5068	8.70406	12.5725	5.80271	0	13.5397	5.80271	0.967118	3.86847	34.8162	0	15.4739	6.76983	15.4739	1.93424	21.2766	7.73694	15.4739	0.967118	11.6054	3.86847	15.4739	19.3424	14.5068	8.70406	21.2766	95.7447	35.7834	16.441	0	9073.5	74.4681	125.725	98.646	29.9807	54.1586	34.8162	31.9149	5644.1
20025	43.2787	15.7377	5.90164	7.86885	15.7377	11.1475	3.93443	0.655738	27.541	14.4262	22.2951	0.655738	3.27869	24.918	13.1148	32.7869	11.8033	1.96721	8.52459	16.3934	5.90164	0.655738	62.9508	17.0492	14.4262	47.2131	6.55738	10.4918	3.27869	40.6557	13.7705	3.27869	5.90164	6.55738	9.18033	3.27869	22.9508	0.655738	28.1967	0	40	16.3934	38.0328	70.8197	20.3279	29.5082	19.0164	25.5738	1440
20026	29.6651	0.956938	0	24.8804	5.74163	20.0957	1.91388	10.5263	38.2775	0.956938	14.3541	16.2679	2.87081	13.3971	23.9234	13.3971	6.69856	5.74163	3.82775	2.87081	12.4402	1.91388	0	6.69856	11.4833	24.8804	83.2536	50.7177	1.91388	10.5263	0.956938	9.56938	8.61244	2.87081	5.74163	2.87081	9.56938	5.74163	6.69856	3.82775	66.9856	24.8804	58.3732	19.1388	7.6555	4.78469	9.56938	25.8373	389.474
20027	17.9584	4.7259	3.78072	6.61626	6.61626	9.4518	0.94518	2.83554	9.4518	17.0132	17.9584	0	6.61626	19.8488	3.78072	4.7259	11.3422	46.3138	1.89036	2.83554	23.6295	17.9584	6.61626	34.9716	9.4518	4.7259	12.2873	21.7391	0	13.2325	1.89036	7.56144	148.393	22.6843	4.7259	1.89036	18.9036	2.83554	18.9036	0.94518	18950.9	31.1909	23.6295	34.0265	3.78072	14.1777	92.6276	8.50662	3413.04
20028	23.2068	8.43882	5.27426	3.16456	13.7131	6.32911	1.05485	1.05485	10.5485	15.8228	10.5485	2.1097	5.27426	17.9325	2.1097	5.27426	5.27426	43.2489	2.1097	6.32911	26.3713	15.8228	5.27426	32.7004	9.49367	11.6034	21.097	16.8776	2.1097	12.6582	3.16456	11.6034	174.051	24.2616	4.21941	5.27426	14.7679	2.1097	26.3713	0	21028.5	27.4262	25.3165	29.5359	8.43882	21.097	93.8819	11.6034	2646.62
20029	25.1509	10.0604	4.02414	8.04829	6.03622	4.02414	2.01207	2.01207	10.0604	12.0724	17.1026	2.01207	7.04225	24.1449	3.01811	2.01207	7.04225	53.3199	2.01207	9.05433	20.1207	16.0966	9.05433	21.1268	4.02414	15.0905	17.1026	23.1388	0	13.0785	5.03018	4.02414	145.875	27.163	0	4.02414	16.0966	9.05433	18.1087	0	19972.8	37.2233	27.163	27.163	7.04225	15.0905	78.4708	6.03622	2458.75
20030	20.7921	6.93069	4.9505	4.9505	7.92079	11.8812	0.990099	2.9703	6.93069	13.8614	10.8911	1.9802	5.94059	15.8416	1.9802	3.9604	6.93069	40.5941	0.990099	4.9505	12.8713	10.8911	7.92079	25.7426	2.9703	10.8911	16.8317	17.8218	0.990099	11.8812	1.9802	4.9505	154.455	15.8416	0.990099	3.9604	13.8614	1.9802	27.7228	0.990099	19422.8	32.6733	18.8119	30.6931	3.9604	12.8713	89.1089	11.8812	1904.95
20031	11.0747	1.64069	6.56276	21.7391	3.28138	1.64069	3.28138	2.46103	28.3019	15.1764	37.7358	0.820345	2.05086	15.9967	7.3831	4.51189	3.28138	2.05086	0.410172	9.84413	0.820345	70.9598	19.6883	10.6645	11.895	16.4069	19.2781	15.5865	0	19.6883	0	0.820345	197.293	6.15258	1.64069	4.10172	15.9967	18.0476	25.8409	0.410172	3.69155	34.4545	28.3019	43.8884	29.9426	1.23052	18.8679	12.3052	3235.44
20032	0	11.5607	0	13.4875	3.85356	3.85356	23.1214	28.9017	71.2909	11.5607	28.9017	0	0	34.6821	5.78035	57.8035	7.70713	0	0	38.5356	1.92678	46.2428	5.78035	40.4624	1.92678	28.9017	3.85356	48.1696	21.1946	13.4875	13.4875	21.1946	9.63391	13.4875	7.70713	0	44.316	21.1946	38.5356	0	78.9981	86.7052	65.5106	80.9249	32.7553	42.3892	15.4143	15.4143	460.501
20033	12.5661	6.61376	4.62963	2.6455	11.2434	16.5344	1.98413	2.6455	27.1164	5.29101	31.0847	5.95238	13.2275	17.1958	4.62963	35.7143	9.92063	9.25926	2.6455	9.92063	15.873	5.29101	4.62963	28.4392	1.98413	41.6667	14.5503	12.5661	0.661376	29.7619	0	13.2275	92.5926	12.5661	2.6455	5.29101	15.2116	27.7778	20.5026	0	32668.7	33.7302	109.127	62.8307	5.29101	99.2063	2765.87	17.1958	1042.33
20034	7.34095	14.6819	10.6036	1.63132	10.6036	7.34095	2.44698	4.0783	29.3638	5.70962	4.0783	0	4.0783	20.3915	13.8662	9.78793	2.44698	4.0783	4.89396	16.3132	8.15661	4.0783	5.70962	10.6036	0.815661	26.9168	13.0506	22.0228	1.63132	61.9902	2.44698	4.89396	16.3132	4.89396	1.63132	13.8662	16.3132	9.78793	9.78793	0	307.504	21.2072	49.7553	84.0131	17.9445	7.34095	45.677	9.78793	4168.84
20035	3.73832	196.262	4.6729	1.86916	7.47664	8.41121	3.73832	1.86916	20.5607	3.73832	13.0841	11.215	6.54206	59.8131	0	44.8598	13.0841	6.54206	7.47664	9.34579	14.0187	1.86916	16.8224	17.757	42.9907	28.0374	4.6729	13.0841	0	42.0561	0	24.2991	9.34579	60.7477	2.80374	8.41121	13.0841	8.41121	10.2804	3.73832	88776.6	142.991	223.364	153.271	43.9252	152.336	42.0561	10.2804	2828.97
20036	1.51668	8.08898	3.03337	5.56117	6.5723	14.1557	1.51668	0.505561	39.4338	4.55005	12.1335	0.505561	1.51668	27.3003	5.05561	18.2002	44.9949	3.53893	5.56117	3.03337	9.1001	27.3003	2.52781	16.178	4.04449	23.2558	39.9393	19.7169	2.52781	19.2113	6.06673	17.6946	21.2336	6.06673	22.7503	18.7058	21.7391	24.7725	4.04449	0	1197.17	17.6946	59.6562	67.7452	12.1335	9.1001	10.1112	10.1112	303.337
20037	3.03951	7.90274	6.07903	6.07903	7.29483	13.9818	1.82371	1.21581	20.0608	9.11854	10.3343	4.86322	20.0608	21.8845	9.11854	18.845	3.64742	4.86322	9.11854	5.47112	4.25532	5.47112	3.03951	27.9635	5.47112	15.1976	17.0213	6.68693	0	18.2371	4.25532	1.21581	47.4164	11.5502	5.47112	4.25532	18.845	2.43161	15.8055	0	30631.6	17.6292	145.897	83.8906	29.1793	96.0486	7.90274	17.0213	343.465
20038	49.8195	5.05415	2.88809	2.88809	3.61011	5.77617	7.94224	0	33.935	13.7184	32.491	7.94224	4.33213	1.44404	2.16606	20.2166	31.769	5.05415	1.44404	13.7184	5.77617	7.94224	0	29.6029	7.22022	11.5523	34.657	45.4874	0	49.8195	3.61011	3.61011	6.49819	0.722022	2.16606	33.935	31.0469	2.16606	23.8267	0	46.9314	35.3791	46.9314	25.2708	5.77617	15.1625	46.9314	38.2671	2901.81
20039	24.9433	2.26757	2.83447	73.1293	52.7211	15.873	2.26757	1.70068	98.6395	5.10204	94.1043	0	3.40136	3.96825	0.566893	34.5805	19.2744	1.70068	2.83447	5.10204	6.80272	2.83447	9.07029	119.615	4.53515	65.7596	13.0385	51.5873	1.13379	36.2812	3.40136	1.70068	1.70068	2.26757	14.1723	2.26757	13.0385	6.23583	9.63719	0	26.644	20.4082	120.748	107.143	31.746	65.1927	69.161	12.4717	675.17
20040	4.50857	13.9766	2.25428	8.11542	1.80343	13.5257	0.450857	0.901713	120.83	25.248	36.0685	2.70514	1.35257	11.2714	5.41028	41.9297	26.1497	2.25428	13.5257	4.05771	8.11542	6.31199	10.3697	75.2931	15.3291	37.4211	17.1326	120.379	7.66456	8.56628	0.901713	4.50857	4.50857	59.9639	4.95942	0.901713	9.01713	1.35257	10.8206	0	21.6411	19.8377	15.78	21.1903	3.156	3.156	0.901713	2.25428	1142.02
20041	6.36267	6.36267	1.06045	28.632	7.42312	9.54401	0	2.12089	8.48356	3.18134	25.4507	2.12089	12.7253	6.36267	9.54401	32.8738	6.36267	0	5.30223	34.9947	3.18134	6.36267	6.36267	38.176	21.2089	26.5111	6.36267	28.632	2.12089	53.0223	1.06045	6.36267	110.286	65.7476	4.24178	4.24178	5.30223	3.18134	28.632	0	36575.8	46.6596	49.8409	80.5938	9.54401	34.9947	82.7147	50.9014	1979.85
20042	5.17598	10.352	3.10559	18.6335	5.17598	2.07039	3.10559	3.10559	12.4224	5.17598	39.3375	4.14079	7.24638	9.31677	6.21118	37.2671	8.28157	1.0352	5.17598	34.1615	10.352	11.3872	7.24638	49.6894	12.4224	25.8799	6.21118	19.6687	2.07039	42.4431	7.24638	9.31677	103.52	46.5839	4.14079	4.14079	9.31677	6.21118	27.9503	0	34981.4	46.5839	61.0766	95.2381	13.4576	19.6687	57.971	44.5135	1197.72
20043	4.25985	11.7146	5.32481	25.5591	7.45474	5.32481	0	3.19489	23.4292	2.12993	29.819	2.12993	13.8445	5.32481	10.6496	35.1438	9.58466	1.06496	3.19489	30.8839	6.38978	10.6496	5.32481	41.5335	18.1044	28.754	5.32481	24.4941	0	56.443	1.06496	19.1693	96.9116	45.7934	5.32481	3.19489	10.6496	4.25985	27.689	0	35718.8	42.5985	61.7678	86.262	7.45474	31.9489	78.8072	44.7284	1276.89
20044	3.39367	7.91855	2.26244	16.9683	6.78733	3.39367	2.26244	6.78733	12.4434	3.39367	39.5928	3.39367	15.8371	5.65611	4.52489	44.1176	5.65611	2.26244	10.181	33.9367	3.39367	11.3122	4.52489	33.9367	18.0995	21.4932	7.91855	13.5747	0	58.8235	3.39367	7.91855	123.303	50.905	1.13122	0	12.4434	3.39367	31.6742	0	37156.1	50.905	52.0362	63.3484	13.5747	40.724	61.086	56.5611	933.258
20045	85.0263	0	0	53.4236	23.3258	0.752445	33.86	3.00978	39.8796	3.00978	12.7916	5.26712	2.25734	4.51467	39.8796	1.50489	5.26712	0	0	45.1467	6.01956	0.752445	0.752445	12.7916	18.8111	18.8111	19.5636	17.3062	11.2867	39.1272	1.50489	6.01956	14.2965	22.5734	3.00978	4.51467	24.8307	2.25734	21.8209	2.25734	1788.56	79.0068	60.1956	54.1761	12.0391	21.0685	133.935	1.50489	4330.32
20046	63.8534	0	2.22099	13.3259	1.11049	7.21821	11.6602	11.6602	68.8506	7.21821	8.88395	0	0.555247	4.99722	0.555247	18.3232	33.3148	3.88673	10.5497	29.4281	19.4336	0.555247	6.10772	35.5358	8.88395	13.3259	24.9861	36.6463	0	40.533	9.4392	27.7624	0	2.77624	6.10772	0	33.3148	4.99722	24.9861	1.11049	56.6352	21.0994	24.9861	82.7318	12.2154	23.3204	17.2127	14.4364	3021.1
20047	70.8155	7.51073	1.07296	6.43777	9.65665	4.29185	0	3.21888	61.1588	1.07296	35.4077	2.14592	11.8026	8.58369	8.58369	23.6052	17.1674	0	9.65665	18.2403	2.14592	1.07296	5.36481	33.2618	11.8026	24.6781	11.8026	16.0944	15.0215	15.0215	10.7296	9.65665	45.0644	0	2.14592	17.1674	2.14592	11.8026	5.36481	0	6562.23	21.4592	32.1888	49.3562	16.0944	52.5751	23.6052	17.1674	171.674
20048	17.0455	29.0404	1.26263	7.57576	4.41919	2.52525	8.20707	4.41919	36.6162	6.94444	31.5657	2.52525	9.4697	5.68182	10.101	9.4697	18.9394	12.6263	2.52525	25.2525	3.78788	2.52525	3.78788	71.9697	5.68182	11.3636	8.20707	18.9394	1.26263	17.6768	0.631313	5.05051	11.3636	14.5202	8.83838	16.4141	61.2374	3.78788	4.41919	1.26263	7590.91	37.8788	58.0808	54.9242	22.7273	49.8737	96.5909	7.57576	2848.48
20049	12.939	0	0	18.4843	1.84843	9.24214	0	5.54529	62.8466	7.39372	31.4233	16.6359	1.84843	14.7874	5.54529	11.0906	16.6359	3.69686	0	7.39372	16.6359	12.939	5.54529	48.0591	0	22.1811	1.84843	3.69686	0	38.817	0	22.1811	0	0	0	5.54529	5.54529	12.939	25.878	0	140.481	36.9686	33.2717	73.9372	20.3327	256.932	55.4529	118.299	1033.27
20050	7.62195	0	0	10.6707	1.52439	4.57317	1.52439	9.14634	54.878	0	22.8659	10.6707	1.52439	18.2927	4.57317	9.14634	16.7683	1.52439	0	9.14634	10.6707	15.2439	1.52439	30.4878	0	25.9146	3.04878	4.57317	1.52439	18.2927	0	30.4878	3.04878	3.04878	0	9.14634	4.57317	1.52439	18.2927	0	109.756	32.0122	19.8171	54.878	21.3415	208.841	32.0122	112.805	512.195
20051	5.92885	0	1.97628	13.834	1.97628	5.92885	3.95257	0	59.2885	1.97628	39.5257	11.8577	0	7.90514	1.97628	9.88142	13.834	1.97628	0	11.8577	19.7628	3.95257	1.97628	45.4545	0	29.6443	3.95257	5.92885	3.95257	25.6917	3.95257	23.7154	0	1.97628	0	7.90514	1.97628	5.92885	31.6206	0	148.221	35.5731	17.7866	63.2411	13.834	310.277	43.4783	120.553	671.937
20052	8.90869	2.22717	4.45434	8.90869	2.22717	4.45434	0	8.90869	62.3608	8.90869	44.5434	11.1359	0	22.2717	11.1359	4.45434	6.68151	2.22717	0	6.68151	28.9532	17.8174	2.22717	57.9065	0	24.4989	2.22717	6.68151	0	42.3163	0	26.7261	2.22717	2.22717	2.22717	8.90869	4.45434	4.45434	37.8619	2.22717	133.63	35.6347	17.8174	66.8151	33.4076	318.486	51.2249	142.539	570.156
20053	46.4396	0	1.54799	20.1238	0	1.54799	9.28793	1.54799	46.4396	1.54799	38.6997	0	1.54799	7.73994	32.5077	30.9598	1.54799	4.64396	1.54799	6.19195	17.0279	3.09598	1.54799	51.0836	6.19195	30.9598	3.09598	40.2477	10.8359	15.4799	4.64396	0	4.64396	6.19195	4.64396	9.28793	12.3839	10.8359	6.19195	3.09598	92.8793	20.1238	57.2755	58.8235	17.0279	18.5759	9.28793	9.28793	1436.53
20054	9.80392	12.7451	13.7255	2.94118	44.1176	4.90196	7.84314	0.980392	168.627	3.92157	95.098	8.82353	5.88235	23.5294	6.86275	126.471	27.451	0	6.86275	5.88235	3.92157	8.82353	15.6863	130.392	0	51.9608	7.84314	86.2745	0.980392	28.4314	5.88235	15.6863	1.96078	0	52.9412	4.90196	1.96078	0	14.7059	0.980392	19.6078	130.392	28.4314	60.7843	5.88235	6.86275	6.86275	9.80392	3618.63
20055	3.79816	3.79816	7.59631	12.4797	10.8519	22.7889	4.88334	1.08519	23.3315	3.25556	114.487	8.1389	14.65	88.4428	3.79816	21.7037	49.9186	1.08519	15.1926	5.96853	11.3945	6.51112	5.42594	54.802	5.42594	61.8557	9.76668	45.5779	0.542594	15.7352	0	5.96853	32.013	16.2778	11.3945	9.76668	3.25556	2.17037	17.363	1.08519	731.416	3.79816	7.59631	4.88334	2.17037	9.22409	1.08519	2.17037	696.69
20056	0.720981	2.88392	4.32588	11.5357	5.04686	18.0245	2.16294	0.720981	46.8637	4.32588	135.544	2.88392	10.0937	45.4218	5.04686	29.5602	3.6049	7.20981	12.9776	1.44196	0	78.5869	31.7231	67.7722	0.720981	205.479	59.1204	88.6806	0	7.20981	0.720981	2.88392	6.48882	116.078	11.5357	6.48882	4.32588	25.2343	0.720981	1.44196	53.3526	6.48882	14.4196	5.76784	0.720981	12.2567	5.76784	2.88392	8267.48
20057	12.4646	1.13314	10.1983	3.96601	9.63173	5.66572	1.13314	4.53258	87.8187	7.36544	69.6884	2.26629	6.79887	37.3938	0	6.79887	6.79887	6.23229	12.4646	2.83286	67.4221	14.1643	2.83286	30.5949	26.6289	88.3853	5.09915	20.9632	8.49858	32.2946	0	6.23229	9.06516	11.3314	2.83286	36.2606	16.4306	4.53258	84.9858	0	211.898	67.4221	14.1643	9.06516	2.83286	3.96601	16.9972	10.1983	4100.28
20058	25.1741	4.82057	6.42742	8.03428	3.21371	9.64114	1.60686	16.0686	16.6042	5.89181	24.6385	0.535619	6.96304	17.6754	13.9261	7.49866	9.10552	7.49866	8.03428	4.82057	10.1768	18.211	4.82057	12.3192	1.60686	40.707	28.9234	21.4247	5.89181	29.459	1.07124	14.9973	28.3878	2.14247	0	10.7124	19.2823	5.89181	27.8522	0	4374.93	17.1398	18.211	30.5303	6.96304	3.74933	10.1768	15.5329	412.962
20059	119.76	49.9002	0	7.98403	17.9641	15.9681	1.99601	17.9641	25.9481	5.98802	29.9401	1.99601	0	13.9721	1.99601	53.8922	7.98403	5.98802	0	0	9.98004	15.9681	5.98802	35.9281	9.98004	51.8962	0	5.98802	7.98403	83.8323	0	0	1.99601	17.9641	11.976	39.9202	15.9681	1.99601	11.976	0	940.12	81.8363	47.9042	59.8802	11.976	7.98403	13.9721	1.99601	17018
20060	127.619	59.0476	3.80952	5.71429	13.3333	15.2381	1.90476	11.4286	40	1.90476	34.2857	0	1.90476	20.9524	5.71429	41.9048	15.2381	1.90476	0	1.90476	3.80952	13.3333	3.80952	43.8095	15.2381	53.3333	0	24.7619	0	80	0	0	7.61905	15.2381	5.71429	43.8095	5.71429	1.90476	11.4286	0	845.714	80	26.6667	49.5238	5.71429	9.52381	7.61905	0	9167.62
20061	148.728	62.6223	3.91389	5.87084	21.5264	19.5695	0	9.78474	46.9667	5.87084	29.3542	1.95695	1.95695	19.5695	0	37.182	15.6556	1.95695	0	0	9.78474	11.7417	0	39.1389	9.78474	39.1389	1.95695	21.5264	15.6556	60.6654	0	0	7.82779	21.5264	21.5264	35.225	23.4834	1.95695	9.78474	0	784.736	68.4932	37.182	43.0528	9.78474	7.82779	11.7417	0	9508.81
20062	137.097	46.371	2.01613	12.0968	20.1613	16.129	0	20.1613	32.2581	10.0806	14.1129	2.01613	0	26.2097	6.04839	18.1452	6.04839	0	0	0	6.04839	14.1129	6.04839	42.3387	12.0968	38.3065	0	34.2742	6.04839	56.4516	0	0	8.06452	26.2097	20.1613	42.3387	14.1129	2.01613	8.06452	0	792.339	74.5968	28.2258	40.3226	8.06452	2.01613	12.0968	0	6858.87
20063	22.335	8.12183	8.12183	5.07614	3.04569	6.09137	8.12183	6.09137	39.5939	7.1066	36.5482	10.1523	9.13706	17.2589	5.07614	15.2284	1.01523	0	4.06091	13.198	8.12183	5.07614	2.03046	29.4416	7.1066	47.7157	3.04569	16.2437	1.01523	49.7462	5.07614	3.04569	45.6853	52.7919	5.07614	10.1523	20.3046	1.01523	15.2284	0	22.335	21.3198	31.4721	45.6853	18.2741	17.2589	5.07614	23.3503	845.685
20064	21.6165	11.2782	5.6391	1.8797	0.93985	4.69925	9.3985	0	32.8947	4.69925	26.3158	7.5188	3.7594	15.0376	8.45865	16.9173	1.8797	0	10.3383	13.1579	5.6391	5.6391	2.81955	41.3534	3.7594	39.4737	3.7594	18.797	0	31.9549	3.7594	6.57895	38.5338	39.4737	9.3985	14.0977	12.218	0.93985	17.8571	0	20.6767	34.7744	36.6541	39.4737	12.218	15.0376	6.57895	13.1579	584.586
20065	21.9058	4.38116	19.7152	5.47645	2.19058	8.76232	8.76232	3.28587	48.1928	16.4294	36.1446	6.57174	7.66703	19.7152	8.76232	12.0482	0	1.09529	8.76232	13.1435	2.19058	5.47645	1.09529	36.1446	5.47645	56.9551	3.28587	16.4294	2.19058	46.0022	6.57174	1.09529	43.8116	44.9069	2.19058	6.57174	10.9529	4.38116	12.0482	0	19.7152	24.0964	35.0493	47.0975	19.7152	23.0011	4.38116	26.287	650.602
20066	23.7113	10.3093	15.4639	1.03093	3.09278	6.18557	2.06186	2.06186	31.9588	9.27835	38.1443	7.21649	5.15464	17.5258	7.21649	14.433	0	3.09278	6.18557	14.433	4.12371	1.03093	4.12371	34.0206	10.3093	48.4536	7.21649	18.5567	2.06186	38.1443	8.24742	0	51.5464	41.2371	0	14.433	21.6495	2.06186	14.433	1.03093	18.5567	19.5876	30.9278	40.2062	16.4948	19.5876	4.12371	30.9278	468.041
20067	38.2862	4.1021	1.36737	9.57156	3.19052	15.041	1.82315	3.19052	64.722	4.1021	13.2179	0	0.911577	19.5989	9.57156	19.1431	14.5852	4.1021	10.4831	12.3063	6.38104	8.20419	1.36737	16.8642	5.01367	62.443	5.46946	9.57156	3.19052	23.701	6.38104	5.01367	8.65998	6.38104	6.83683	13.6737	15.041	5.92525	26.4357	0	38.742	28.2589	17.7758	27.3473	10.0273	14.5852	7.29262	5.92525	2109.39
20068	6.9869	0	2.62009	59.3886	1.74672	2.62009	7.86026	0.873362	41.048	6.9869	64.6288	6.11354	1.74672	3.49345	17.4672	59.3886	20.9607	3.49345	9.60699	73.3624	1.74672	27.0742	21.8341	51.5284	3.49345	34.0611	7.86026	48.9083	2.62009	71.6157	0.873362	4.36681	18.3406	27.0742	13.9738	0	25.3275	6.9869	12.2271	1.74672	30.5677	108.297	41.048	114.41	12.2271	16.5939	27.0742	50.655	247.162
20069	28.5714	41.9643	0.892857	0.892857	5.35714	14.2857	6.25	1.78571	66.9643	24.1071	35.7143	4.46429	1.78571	14.2857	1.78571	47.3214	8.92857	2.67857	1.78571	13.3929	3.57143	4.46429	2.67857	24.1071	1.78571	28.5714	3.57143	16.0714	20.5357	38.3929	16.0714	2.67857	7.14286	27.6786	0	23.2143	16.9643	10.7143	35.7143	0	58.0357	78.5714	41.9643	109.821	26.7857	38.3929	5.35714	17.8571	354.464
20070	52.4862	2.30203	2.30203	23.9411	2.76243	4.14365	4.60405	3.22284	34.9908	10.5893	17.4954	0	10.5893	22.0994	13.3517	29.9263	5.98527	0	3.22284	8.7477	4.14365	15.1934	2.76243	32.6888	6.44567	42.8177	7.82689	17.9558	0.460405	19.7974	1.38122	2.30203	33.6096	5.52486	9.66851	0	30.3867	3.22284	34.07	0	5470.53	13.8122	50.1842	31.3076	5.98527	16.1142	8.7477	15.1934	609.576
20071	15.2122	20.8167	2.40192	5.60448	12.8102	4.80384	3.20256	2.40192	32.0256	3.20256	26.4211	0	1.60128	9.60769	10.4083	24.8199	23.2186	13.6109	0	5.60448	15.2122	18.4147	0	44.0352	8.00641	40.8327	20.8167	16.8135	15.2122	20.016	0	6.40512	3.20256	0	7.20576	0.800641	8.80705	6.40512	15.2122	0	839.872	17.6141	28.8231	27.2218	8.80705	6.40512	4.0032	14.4115	500.4
20072	29.6128	1.13895	0	31.8907	4.55581	4.55581	0	6.83371	52.3918	10.2506	26.1959	1.13895	0	43.2802	19.3622	6.83371	29.6128	1.13895	0	27.3349	7.97267	14.8064	5.69476	47.836	3.41686	30.7517	10.2506	19.3622	6.83371	27.3349	3.41686	14.8064	0	2.2779	14.8064	29.6128	26.1959	2.2779	11.3895	0	58.0866	25.0569	39.8633	61.5034	11.3895	14.8064	29.6128	7.97267	966.97
20073	15.873	0	2.6455	25.1323	0	3.96825	1.32275	5.29101	33.0688	9.25926	18.5185	0	0	59.5238	23.8095	3.96825	48.9418	3.96825	3.96825	14.5503	5.29101	13.2275	6.61376	50.2646	2.6455	31.746	19.8413	25.1323	6.61376	21.164	6.61376	7.93651	1.32275	1.32275	14.5503	44.9735	19.8413	2.6455	13.2275	0	70.1058	21.164	48.9418	93.9153	15.873	13.2275	26.455	3.96825	682.54
20074	23.3918	1.16959	0	17.5439	0	1.16959	2.33918	4.67836	47.9532	12.8655	11.6959	2.33918	1.16959	43.2749	23.3918	8.18713	35.0877	1.16959	3.50877	24.5614	2.33918	14.0351	7.01754	42.1053	1.16959	23.3918	17.5439	14.0351	8.18713	29.2398	3.50877	8.18713	1.16959	2.33918	5.84795	35.0877	26.9006	1.16959	9.35673	0	56.1404	32.7485	52.6316	57.3099	12.8655	21.0526	17.5439	2.33918	626.901
20075	20.6561	1.21507	2.43013	26.7315	1.21507	1.21507	2.43013	3.6452	43.7424	8.50547	20.6561	0	0	31.5917	21.8712	10.9356	44.9575	2.43013	1.21507	25.5164	2.43013	15.7959	7.2904	38.8821	1.21507	30.3767	10.9356	23.0863	3.6452	20.6561	6.07533	13.3657	0	1.21507	23.0863	19.4411	23.0863	3.6452	13.3657	1.21507	54.678	29.1616	34.0219	60.7533	14.5808	12.1507	19.4411	2.43013	413.123
20076	3.06122	4.08163	7.14286	2.04082	15.3061	27.551	2.04082	0	34.6939	4.08163	6.12245	11.2245	13.2653	9.18367	1.02041	21.4286	1.02041	1.02041	0	1.02041	19.3878	24.4898	22.449	14.2857	16.3265	60.2041	70.4082	27.551	0	10.2041	0	1.02041	55.102	14.2857	15.3061	1.02041	29.5918	8.16327	48.9796	0	12.2449	24.4898	15.3061	5.10204	3.06122	6.12245	23.4694	7.14286	638.776
20077	4.43459	1.10865	8.86918	1.10865	16.6297	24.3902	0	4.43459	46.5632	14.4124	2.21729	1.10865	12.1951	8.86918	2.21729	26.6075	2.21729	1.10865	0	2.21729	8.86918	24.3902	19.9557	21.0643	8.86918	68.7361	67.6275	32.1508	1.10865	21.0643	2.21729	4.43459	62.0843	18.847	5.54324	2.21729	21.0643	1.10865	26.6075	0	24.3902	26.6075	26.6075	12.1951	6.65188	17.7384	11.0865	14.4124	417.96
20078	9.33489	3.50058	4.66744	0	17.5029	18.6698	4.66744	1.16686	46.6744	16.3361	9.33489	3.50058	9.33489	9.33489	2.33372	22.1704	2.33372	4.66744	0	3.50058	10.5018	26.8378	30.3384	21.0035	9.33489	81.6803	72.3454	35.0058	2.33372	17.5029	1.16686	4.66744	64.1774	10.5018	7.00117	2.33372	12.8355	0	38.5064	0	15.1692	24.5041	17.5029	11.6686	5.83431	11.6686	12.8355	22.1704	472.579
20079	2.29621	2.29621	9.18485	0	17.2216	37.8875	5.74053	1.14811	41.3318	11.4811	11.4811	2.29621	20.6659	10.333	1.14811	14.9254	3.44432	2.29621	0	3.44432	14.9254	30.9989	18.3697	18.3697	6.88863	55.1091	67.7382	34.4432	1.14811	6.88863	0	1.14811	53.961	22.9621	8.03674	1.14811	22.9621	2.29621	42.4799	0	17.2216	18.3697	16.0735	12.6292	1.14811	13.7773	19.5178	16.0735	297.359
20080	13.8445	1.06496	4.25985	4.25985	26.6241	11.7146	0	0	10.6496	14.9095	22.3642	0	3.19489	64.9627	6.38978	18.1044	3.19489	1.06496	0	8.5197	73.4824	64.9627	19.1693	10.6496	14.9095	20.2343	1.06496	20.2343	2.12993	20.2343	3.19489	11.7146	75.6124	8.5197	35.1438	5.32481	17.0394	11.7146	8.5197	1.06496	39.4036	66.0277	15.9744	51.1182	7.45474	3.19489	24.4941	9.58466	6670.93
20081	24.3142	1.24688	5.61097	11.2219	0.623441	4.36409	0.623441	6.23441	29.9252	6.85786	12.4688	3.11721	6.85786	45.5112	10.5985	7.4813	1.87032	1.87032	11.2219	11.2219	41.7706	29.9252	3.11721	62.9676	14.9626	41.7706	9.97506	23.6908	1.87032	57.3566	3.11721	6.23441	19.3267	31.7955	1.87032	3.74065	3.74065	2.49377	19.3267	0.623441	7694.51	27.4314	37.4065	67.9551	13.0923	27.4314	120.948	11.8454	183.292
20082	6.0241	38.0271	7.15361	10.5422	5.27108	7.53012	5.64759	3.38855	18.4488	1.88253	14.3072	4.14157	29.744	13.5542	1.88253	21.4608	13.9307	6.77711	21.8373	7.53012	19.9548	7.15361	12.8012	25.2259	10.9187	14.3072	3.76506	24.8494	1.12952	16.1898	0.376506	12.0482	28.6145	17.6958	7.90663	13.5542	16.1898	3.76506	5.27108	1.12952	6349.02	68.5241	23.7199	25.9789	19.9548	57.2289	6.4006	22.9669	190.136
20083	108.661	9.44882	3.14961	0	0	14.1732	0	0	40.9449	6.29921	3.14961	0	4.72441	6.29921	0	20.4724	23.622	3.14961	0	6.29921	6.29921	18.8976	0	22.0472	1.5748	81.8898	12.5984	17.3228	4.72441	37.7953	3.14961	0	4.72441	14.1732	6.29921	1.5748	17.3228	12.5984	26.7717	0	33.0709	100.787	23.622	20.4724	7.87402	22.0472	4.72441	33.0709	2182.68
20084	72.8155	82.5243	1.21359	0	2.42718	15.7767	3.64078	12.1359	42.4757	1.21359	99.5146	3.64078	0	4.85437	10.9223	18.2039	2.42718	4.85437	12.1359	1.21359	6.06796	7.28155	1.21359	105.583	7.28155	41.2621	9.70874	31.5534	0	48.5437	6.06796	2.42718	40.0485	7.28155	1.21359	1.21359	23.0583	1.21359	76.4563	2.42718	21.8447	81.3107	25.4854	87.3786	6.06796	16.9903	14.5631	8.49515	560.68
20085	0	12.848	0	6.42398	4.28266	25.6959	4.28266	6.42398	29.9786	14.9893	57.8158	0	4.28266	4.28266	10.7066	4.28266	4.28266	25.6959	6.42398	27.8373	8.56531	8.56531	2.14133	10.7066	2.14133	62.0985	4.28266	6.42398	0	66.3812	2.14133	6.42398	14.9893	2.14133	8.56531	0	14.9893	2.14133	663.812	0	38.5439	21.4133	17.1306	34.2612	68.5225	27.8373	19.2719	6.42398	10314.8
20086	0	8.09717	2.02429	4.04858	8.09717	18.2186	8.09717	16.1943	20.2429	14.17	68.8259	2.02429	4.04858	10.1215	10.1215	2.02429	4.04858	22.2672	6.07287	36.4372	4.04858	14.17	0	8.09717	0	48.583	2.02429	14.17	2.02429	64.7773	0	8.09717	8.09717	8.09717	14.17	4.04858	14.17	0	619.433	0	42.5101	16.1943	12.1457	24.2915	58.7045	18.2186	18.2186	8.09717	7787.45
20087	0	1.99203	1.99203	5.9761	7.96813	19.9203	5.9761	19.9203	19.9203	5.9761	75.6972	1.99203	0	3.98406	9.96016	1.99203	7.96813	27.8884	5.9761	33.8645	3.98406	11.9522	0	11.9522	0	51.7928	3.98406	5.9761	3.98406	53.7849	1.99203	7.96813	5.9761	0	1.99203	0	7.96813	0	639.442	0	57.7689	11.9522	15.9363	35.8566	63.745	47.8088	9.96016	11.9522	7245.02
20088	0	10.6157	8.49257	2.12314	8.49257	21.2314	0	21.2314	23.3546	4.24628	97.6645	0	2.12314	10.6157	6.36943	2.12314	8.49257	16.9851	8.49257	21.2314	2.12314	23.3546	0	12.7389	0	61.5711	10.6157	6.36943	0	38.2166	8.49257	4.24628	6.36943	4.24628	2.12314	0	2.12314	4.24628	719.745	0	59.448	33.9703	33.9703	33.9703	84.9257	36.0934	4.24628	4.24628	6133.76
100100	3.83142	1.91571	0.957854	2.87356	2.87356	0	54.5977	3.83142	52.682	0.957854	5.74713	0	0	28.7356	12.4521	7.66284	57.4713	2.87356	1.91571	21.0728	2.87356	11.4943	5.74713	7.66284	6.70498	72.7969	49.8084	62.2605	0.957854	72.7969	16.2835	24.9042	0.957854	0	11.4943	2.87356	26.8199	77.5862	58.4291	49.8084	132.184	133.142	121.648	90.9962	67.0498	38.3142	26.8199	24.9042	69.9234
100101	9.59488	7.46269	9.06183	4.26439	2.1322	3.73134	154.584	17.0576	5.33049	17.0576	11.194	1.0661	4.79744	28.2516	20.2559	4.79744	12.7932	17.0576	1.0661	15.4584	1.59915	18.1237	1.59915	47.9744	27.7186	68.2303	3.19829	11.194	0.533049	78.3582	12.7932	14.9254	7.46269	2.66525	23.4542	9.59488	64.4989	85.2878	55.4371	511.727	40214.3	92.2175	249.467	807.036	97.548	154.051	89.5522	39.4456	81.0235
100102	3.40861	8.09544	0	4.68683	3.83468	0	92.4585	9.37367	27.6949	20.8777	32.3818	0.852152	4.26076	13.2084	16.1909	7.24329	24.2863	26.8428	2.98253	5.96506	0.852152	23.4342	1.7043	50.703	4.26076	57.5202	8.52152	29.8253	2.55646	66.4678	2.98253	2.55646	5.96506	0.852152	0.426076	2.98253	20.8777	12.3562	31.9557	332.339	209.203	52.4073	83.5109	296.123	49.8509	41.3294	26.8428	10.2258	126.545
100103	0.954654	0.477327	2.38663	4.77327	4.77327	0.477327	138.902	4.29594	51.5513	12.4105	9.06921	0	2.38663	35.7995	15.2745	2.86396	37.7088	5.2506	1.90931	7.63723	0.477327	22.9117	3.34129	23.8663	16.2291	31.0263	52.9833	42.4821	1.90931	85.9189	16.7064	11.4558	1.43198	0.954654	23.8663	1.43198	31.9809	22.4344	21.0024	574.702	63.0072	74.9403	36.2768	757.995	46.778	23.389	45.3461	30.0716	96.8974
100104	14.8515	21.0396	1.23762	1.23762	4.9505	0	293.317	0	8.66337	1.23762	1.23762	0	1.23762	247.525	0	6.18812	99.0099	0	0	2.47525	4.9505	77.9703	1.23762	1.23762	0	34.6535	28.4653	100.248	0	3.71287	2.47525	25.9901	4.9505	3.71287	128.713	50.7426	24.7525	38.3663	13.6139	998.762	264.851	356.436	240.099	1347.77	154.703	73.0198	80.4455	19.802	266.089
100105	0	0	0	0	4.35256	0	194.777	38.0849	39.173	31.556	14.1458	1.08814	7.61697	13.0577	1.08814	3.26442	193.689	1.08814	2.17628	7.61697	0	17.4102	0	46.79	9.79325	30.4679	90.3156	167.573	0	58.7595	3.26442	67.4646	2.17628	1.08814	161.045	1.08814	35.9086	97.9325	55.4951	734.494	57.6714	184.984	35.9086	815.016	79.4342	15.2339	17.4102	6.52884	292.709
100107	4.06977	9.88372	18.0233	0	3.48837	4.65116	104.07	1.74419	32.5581	29.6512	6.39535	1.74419	9.30233	8.13953	3.48837	9.88372	29.0698	11.0465	8.72093	6.97674	1.16279	20.3488	4.65116	22.6744	17.4419	63.9535	8.72093	74.4186	0.581395	66.2791	9.88372	69.7674	23.8372	12.2093	5.81395	6.97674	32.5581	36.6279	34.8837	434.302	35802.9	102.326	100.581	478.488	50.5814	53.4884	8.13953	27.3256	88.3721
100108	5.58179	21.8978	15.4573	48.5187	32.2027	8.15801	10.3049	12.8811	20.1803	13.3104	11.1636	2.14684	12.0223	60.1116	3.00558	45.5131	22.3272	8.58738	7.29927	6.01116	2.57621	6.01116	3.00558	10.7342	17.6041	32.632	10.3049	6.8699	1.28811	33.4908	0.429369	15.4573	33.4908	7.72864	28.7677	4.29369	28.3383	10.7342	9.01675	29.6264	24.0447	34.7789	66.9815	91.0262	24.474	6.8699	6.44053	7.29927	36.4964
100109	4.11765	18.8235	2.94118	1.76471	0.588235	4.70588	98.2353	9.41176	23.5294	5.88235	17.6471	2.35294	5.88235	18.2353	5.29412	64.7059	24.1176	6.47059	4.11765	5.88235	1.17647	8.82353	1.17647	35.2941	10	64.1176	39.4118	27.6471	1.17647	46.4706	0.588235	4.70588	8.82353	10	4.11765	7.05882	82.3529	8.23529	54.1176	354.118	11207.1	34.7059	95.8824	378.824	26.4706	41.1765	484.118	21.1765	74.7059
100110	2.66099	0	42.0436	9.57956	7.45077	3.72539	56.413	1.0644	19.6913	7.45077	5.85418	15.9659	7.45077	39.9148	4.78978	32.9963	4.25758	26.6099	5.32198	6.91857	11.7084	20.7557	10.644	26.0777	3.19319	21.2879	14.9015	21.2879	0	39.9148	2.12879	60.6706	133.582	54.2842	2.12879	7.45077	13.3049	2.66099	4.25758	214.476	388610	26.0777	370.942	243.214	21.8201	79.8297	22.8845	27.6743	83.0229
100111	1.10742	1.10742	3.87597	2.21484	1.10742	1.10742	109.635	10.5205	40.4208	9.41307	29.3466	9.41307	3.87597	59.8007	27.6855	9.96678	24.3632	0.55371	4.98339	12.1816	2.21484	21.5947	2.76855	95.2381	12.7353	94.1307	16.0576	24.3632	0	99.6678	1.10742	2.21484	4.42968	9.96678	14.9502	12.1816	14.3965	9.41307	75.8583	393.688	43.7431	18.8261	30.454	380.399	34.33	2.76855	17.165	26.0244	138.981
100112	0	0	0	2.22058	4.44115	0.740192	37.0096	14.0637	16.2842	71.7987	23.6862	0	2.96077	63.6566	15.544	8.14212	48.1125	0	2.22058	0.740192	1.48038	32.5685	18.5048	39.9704	8.88231	20.7254	27.3871	63.6566	5.92154	88.0829	0	76.2398	2.96077	0	45.1517	15.544	43.6714	48.8527	28.8675	82.9016	32.5685	141.377	39.9704	188.009	202.813	5.92154	31.8283	6.66173	83.6417
100113	2.94613	2.94613	1.6835	0.420875	2.94613	4.62963	111.111	1.6835	18.9394	25.6734	14.7306	2.10438	3.367	22.7273	6.31313	15.1515	13.8889	1.26263	5.05051	8.41751	0.420875	23.1481	6.73401	34.5118	12.2054	28.6195	6.73401	27.3569	0	37.4579	1.6835	15.1515	8.41751	5.89226	2.10438	19.7811	38.7205	15.9933	15.5724	428.872	52.1886	42.9293	42.9293	471.801	35.3535	13.8889	24.4108	26.0943	81.229
100114	3.46192	10.3858	1.48368	2.96736	21.2661	3.46192	23.7389	13.8477	12.364	16.815	25.7171	0.98912	1.48368	61.3254	0.49456	27.2008	24.2334	0.98912	3.95648	20.277	1.48368	5.44016	9.8912	23.7389	6.42928	9.8912	5.44016	32.1464	0	33.6301	2.4728	8.40752	44.5104	9.39664	9.8912	14.8368	52.4233	27.2008	30.6627	61.3254	109066	145.401	533.136	332.839	108.309	432.74	143.917	24.2334	61.3254
100115	18.9274	16.4739	2.45356	5.60813	0.701016	6.30915	19.278	1.75254	15.4224	5.25762	65.8955	1.05152	11.9173	16.4739	4.55661	22.082	6.65966	5.60813	3.85559	3.50508	5.25762	15.7729	6.65966	8.4122	9.46372	22.4325	9.81423	10.1647	0.350508	23.4841	0.701016	4.55661	50.1227	9.46372	10.5152	31.5457	22.4325	1.40203	10.5152	44.164	308.798	21.7315	25.9376	85.1735	10.1647	25.2366	23.8346	33.2983	45.2156
100116	4.09836	0.819672	3.68852	5.32787	1.63934	7.78689	106.148	3.68852	18.8525	9.01639	14.3443	18.0328	1.22951	17.2131	8.19672	12.7049	28.2787	4.09836	6.96721	1.22951	1.63934	34.8361	1.63934	18.0328	5.7377	29.5082	14.7541	17.623	0.409836	20.082	0.409836	27.0492	11.8852	2.04918	5.32787	12.2951	14.3443	11.0656	13.1148	427.459	32192.2	48.7705	66.8033	458.197	26.6393	33.6066	35.2459	29.5082	80.3279
100117	2.50731	13.7902	2.9252	0.835771	0.417885	4.17885	122.858	0.835771	27.9983	8.7756	15.0439	1.67154	27.1626	68.9511	0.835771	3.34308	9.19348	0.835771	11.7008	5.43251	3.76097	63.1007	3.76097	5.01463	33.013	79.8161	9.61137	9.19348	0	37.6097	3.76097	14.2081	12.1187	42.6243	18.8048	4.59674	25.0731	19.2227	52.6536	467.614	51.3999	28.4162	32.5951	562.892	22.9837	11.7008	20.4764	40.9528	73.9657
100118	2.43665	19.0058	0	7.79727	1.46199	0.487329	126.218	30.2144	15.1072	9.25926	12.6706	0	0.487329	7.79727	38.0117	0.487329	18.0312	8.2846	14.6199	2.43665	0	30.2144	11.6959	45.809	28.7524	89.1813	3.89864	33.1384	3.41131	77.9727	0	9.74659	4.87329	0.974659	27.7778	10.7212	22.4172	15.1072	49.2203	524.854	21967.3	37.5244	40.4483	469.786	31.6764	17.0565	5488.3	11.2086	106.238
100119	18.3993	0	0	0	25.759	55.1978	102.116	42.3183	3.67985	30.3588	13.7994	0.919963	0	0.919963	340.386	1.83993	14.7194	5.51978	0	0	47.8381	7.35971	16.5593	28.5189	8.27967	46.9181	93.8362	41.3983	0	16.5593	0	5.51978	0.919963	0	0	2.75989	0.919963	3.67985	15.6394	379.025	149.954	33.1187	7.35971	331.187	11.0396	9.19963	22.0791	2.75989	204.232
100120	3.84986	13.4745	0	0.962464	11.5496	7.69971	368.624	4.81232	15.3994	2.88739	4.81232	0	1.92493	3.84986	12.512	0.962464	13.4745	0.962464	19.2493	0	7.69971	21.1742	3.84986	13.4745	4.81232	21.1742	0.962464	22.1367	0	45.2358	25.0241	56.7854	13.4745	2.88739	19.2493	17.3244	24.0616	17.3244	11.5496	1488.93	574.591	41.3859	712.223	1540.9	361.886	36.5736	44.2733	10.5871	222.329
100121	81.203	16.5414	0	25.5639	16.5414	7.5188	9.02256	1.50376	6.01504	6.01504	3.00752	0	0	3.00752	0	15.0376	4.51128	4.51128	4.51128	90.2256	4.51128	6.01504	69.1729	4.51128	1.50376	9.02256	1.50376	13.5338	57.1429	12.0301	3.00752	0	3.00752	30.0752	3.00752	4.51128	75.188	1.50376	12.0301	7.5188	502.256	34.5865	91.7293	114.286	63.1579	4.51128	55.6391	16.5414	6.01504
100122	39.5778	14.0721	2.63852	0.879507	94.9868	7.03606	5.27704	0.879507	56.2885	0	25.5057	20.2287	0	18.4697	1.75901	3.51803	0	4.39754	29.9033	11.4336	8.79507	14.9516	0	12.3131	0.879507	14.9516	0	7.03606	5.27704	16.7106	0	1.75901	8.79507	0	3.51803	4.39754	2.63852	6.15655	21.1082	4.39754	404.573	11.4336	30.7828	88.8303	64.204	14.9516	22.8672	23.7467	2.63852
100123	83.1793	0	0.924214	26.8022	51.756	0	6.4695	0.924214	30.4991	0	12.939	0.924214	0	3.69686	4.62107	8.31793	0	9.24214	18.4843	43.4381	4.62107	51.756	5.54529	44.3623	5.54529	37.8928	10.1664	25.878	7.39372	17.5601	1.84843	0.924214	0	24.0296	0.924214	0.924214	12.939	7.39372	20.3327	16.6359	25.878	64.695	7.39372	592.421	18.4843	4.62107	8.31793	34.1959	12.0148
100124	36.7516	4.74215	1.7783	0	22.5252	24.3035	4.14938	0.592768	39.7155	5.33491	11.2626	1.7783	5.33491	39.1227	5.33491	14.8192	11.8554	3.55661	32.0095	8.89152	2.37107	4.14938	3.55661	20.1541	7.70599	30.8239	7.70599	7.11322	6.52045	12.4481	0	2.96384	24.8963	6.52045	1.7783	18.9686	13.6337	2.96384	37.3444	7.11322	200893	23.7107	181.98	101.956	45.0504	409.01	17.783	14.8192	14.8192
100125	19.984	1.59872	6.39488	75.1399	0.799361	9.59233	5.59552	1.59872	51.1591	6.39488	51.9584	2.39808	3.9968	15.9872	2.39808	74.3405	1.59872	3.19744	2.39808	87.9297	4.79616	10.3917	17.5859	6.39488	0.799361	79.9361	1.59872	7.19424	0	10.3917	3.19744	0.799361	5.59552	251.799	3.9968	3.9968	2.39808	4.79616	9.59233	7.99361	3098.32	115.108	68.745	149.48	83.1335	5.59552	15.9872	92.7258	3.19744
100126	3.53982	0	0.589971	2.94985	51.3274	0.589971	20.059	6.48968	57.2271	1.17994	21.2389	17.1091	4.71976	6.48968	12.3894	27.7286	0	2.35988	4.12979	5.30973	11.7994	4.71976	2.35988	40.118	4.71976	48.9676	6.48968	8.25959	0	42.4779	1.17994	3.53982	80.826	5.30973	9.43953	8.84956	28.3186	11.2094	33.0383	47.1976	24.1888	37.7581	44.2478	57.2271	111.504	11.2094	11.2094	34.2183	4.12979
100127	15.4242	2.57069	0	0	28.2776	0	213.368	2.57069	0	2.57069	5.14139	74.5501	0	7.71208	12.8535	0	0	5.14139	0	0	2.57069	5.14139	0	2.57069	61.6967	15.4242	7.71208	20.5656	2.57069	223.65	2.57069	2.57069	12.8535	53.9846	2.57069	0	2.57069	43.7018	92.545	642.674	46.2725	15.4242	25.7069	285.347	208.226	23.1362	2.57069	87.4036	5.14139
100128	2.71493	0.904977	3.61991	0	5.42986	0.904977	3.61991	6.33484	7.23982	0.904977	3.61991	0.904977	9.04977	13.5747	46.1538	18.0995	0	27.1493	0	2.71493	11.7647	38.914	28.0543	9.04977	10.8597	17.1946	4.52489	60.6335	0	52.4887	0	3.61991	13.5747	3.61991	31.6742	28.9593	16.2896	39.819	36.1991	13.5747	1942.08	110.407	82.3529	161.086	53.3937	42.5339	99.5475	28.0543	2.71493
100129	0	9.97783	0	1.10865	2.21729	1.10865	8.86918	6.65188	41.02	4.43459	200.665	12.1951	0	43.2373	0	12.1951	5.54324	11.0865	5.54324	0	7.76053	5.54324	4.43459	31.0421	9.97783	13.3038	3.32594	12.1951	3.32594	41.02	2.21729	2.21729	7.76053	19.9557	0	12.1951	3.32594	24.3902	14.4124	8.86918	29.9335	32.1508	68.7361	36.5854	45.4545	11.0865	6.65188	25.4989	5.54324
100130	83.3333	3.0303	1.51515	0	53.0303	0	21.2121	1.51515	12.1212	1.51515	15.1515	0	0	13.6364	1.51515	24.2424	0	3.0303	50	19.697	7.57576	9.09091	250	7.57576	3.0303	19.697	0	6.06061	0	27.2727	7.57576	0	16.6667	1.51515	7.57576	0	10.6061	6.06061	24.2424	12.1212	3737.88	18.1818	81.8182	74.2424	15.1515	51.5152	6.06061	4.54545	30.303
100131	27.5651	0	0	6.12557	3.06279	0	9.18836	0	4.59418	0	35.2221	12.2511	0	75.0383	7.65697	22.9709	24.5023	38.2848	0	0	24.5023	36.7534	10.7198	0	0	6.12557	3.06279	22.9709	3.06279	62.7871	0	0	4.59418	18.3767	45.9418	0	18.3767	35.2221	10.7198	13.7825	78.1011	29.0965	55.1302	90.3522	630.934	7.65697	38.2848	29.0965	1.53139
100132	35.0404	0	0	0	48.5175	0	24.2588	16.1725	0	0	0	0	0	5.39084	0	80.8625	0	0	2.69542	0	13.4771	97.035	37.7358	0	2.69542	91.6442	10.7817	29.6496	0	5.39084	18.8679	0	315.364	126.685	5.39084	37.7358	8.08625	5.39084	5.39084	48.5175	40.4313	5.39084	40.4313	64.69	2.69542	40.4313	13.4771	5.39084	0
100133	70.2179	0	0	15.7385	6.05327	0	15.7385	0	47.2155	1.21065	8.47458	8.47458	0	26.6344	25.4237	37.5303	0	10.8959	0	21.7918	21.7918	13.3172	10.8959	12.1065	13.3172	6.05327	0	4.84262	0	21.7918	16.9492	4.84262	0	14.5278	6.05327	6.05327	42.3729	30.2663	4.84262	24.2131	19.3705	94.431	18.1598	55.6901	191.283	23.0024	1.21065	36.3196	1.21065
100134	0	0	0	0	1.63399	0	13.0719	4.90196	117.647	6.53595	73.5294	230.392	0	16.3399	60.4575	60.4575	8.16993	0	0	0	4.90196	116.013	16.3399	11.4379	11.4379	0	0	11.4379	35.9477	17.9739	3.26797	1.63399	1.63399	0	8.16993	1.63399	6.53595	11.4379	80.0654	14.7059	80.0654	235.294	133.987	130.719	354.575	142.157	11.4379	544.118	3.26797
100135	14.5103	0	0	8.46433	26.6022	7.25514	7.25514	21.7654	33.8573	25.393	3.62757	7.25514	1.20919	3.62757	15.7195	9.67352	2.41838	2.41838	4.83676	2.41838	10.8827	6.04595	8.46433	38.6941	2.41838	14.5103	0	30.2297	0	95.526	0	0	3.62757	24.1838	0	1.20919	6.04595	13.3011	12.0919	19.347	189.843	55.6227	27.8114	171.705	183.797	3.62757	12.0919	8.46433	8.46433
100136	8.16327	0	0	0	6.12245	6.12245	16.3265	2.04082	32.6531	18.3673	2.04082	4.08163	0	24.4898	18.3673	18.3673	2.04082	0	20.4082	6.12245	0	12.2449	1446.94	57.1429	0	55.102	2.04082	8.16327	0	75.5102	2.04082	12.2449	34.6939	0	18.3673	0	22.449	12.2449	42.8571	6.12245	24.4898	20.4082	18.3673	51.0204	63.2653	18.3673	4.08163	6.12245	4.08163
100137	123.077	0	0	1.3986	2.7972	0	23.7762	1.3986	34.965	2.7972	8.39161	13.986	0	0	16.7832	6.99301	15.3846	15.3846	8.39161	4.1958	26.5734	6.99301	4.1958	75.5245	2.7972	9.79021	1.3986	29.3706	5.59441	71.3287	5.59441	1.3986	19.5804	1.3986	9.79021	2.7972	12.5874	12.5874	53.1469	22.3776	20.979	22.3776	8.39161	41.958	93.7063	8.39161	55.9441	16.7832	18.1818
100138	54.1082	0	5.01002	8.01603	51.1022	15.0301	11.022	0	1.002	0	13.0261	3.00601	1.002	10.02	0	5.01002	1.002	1.002	28.0561	0	8.01603	132.265	5.01002	4.00802	14.0281	43.0862	1.002	37.0741	0	5.01002	0	1.002	61.1222	16.0321	7.01403	0	1.002	55.1102	24.0481	22.0441	96.1924	56.1122	124.248	293.587	56.1122	13.0261	14.0281	1.002	1.002
100139	13.6084	0.438982	0.877963	0	12.7305	7.02371	3.95083	26.7779	19.3152	2.19491	39.9473	8.34065	3.95083	92.6251	4.8288	5.26778	3.95083	10.5356	2.63389	21.0711	0	6.14574	6.14574	35.5575	68.0421	21.9491	2.63389	18.4372	0.438982	14.4864	4.8288	7.90167	48.727	3.51185	21.0711	0.438982	19.7542	5.26778	49.6049	7.02371	215.979	31.1677	34.6795	168.13	35.1185	72.8709	34.6795	23.705	7.46269
100140	39.6575	9.46372	6.7598	9.46372	4.50653	7.66111	1.35196	10.8157	20.7301	6.7598	11.2663	8.11176	9.46372	35.6016	13.5196	29.7431	16.6742	4.95719	13.5196	9.91438	19.8288	3.60523	13.9703	11.717	1.80261	38.7562	2.70392	13.9703	0	33.3484	2.70392	10.8157	37.4042	1.80261	28.3912	8.11176	4.05588	4.50653	7.66111	3.15457	753.042	18.4768	27.0392	27.4899	38.3055	3.60523	4.50653	10.8157	0.901307
100141	1.05932	41.3136	0	1.05932	8.47458	2.11864	74.1525	2.11864	14.8305	5.29661	7.41525	1.05932	1.05932	70.9746	2.11864	11.6525	2.11864	8.47458	0	93.2203	5.29661	61.4407	56.1441	1.05932	1.05932	14.8305	2.11864	47.6695	10.5932	49.7881	22.2458	2.11864	3.17797	3.17797	45.5508	13.7712	42.3729	317.797	8.47458	562.5	221.398	25.4237	293.432	380.297	175.847	44.4915	21.1864	9.5339	18.0085
100142	133.221	1.68634	1.68634	11.8044	23.6088	3.37268	62.3946	3.37268	0	1.68634	21.9224	11.8044	0	0	1.68634	13.4907	3.37268	6.74536	33.7268	6.74536	21.9224	1.68634	3.37268	1.68634	1.68634	32.0405	5.05902	16.8634	5.05902	45.5312	3.37268	0	16.8634	15.1771	18.5497	0	5.05902	0	16.8634	106.239	72.5126	129.848	8.4317	185.497	288.364	10.118	1.68634	40.4722	121.417
100143	3.93391	3.93391	0	40.1259	2.36035	0	72.3839	4.72069	92.8403	0.786782	2.36035	8.6546	0.786782	77.1046	16.5224	73.9575	2.36035	16.5224	16.5224	25.9638	7.86782	62.1558	54.288	15.7356	11.8017	16.5224	23.6035	28.3242	0	151.849	45.6334	29.8977	0.786782	19.6696	60.5822	6.29426	53.5012	144.768	2.36035	140.834	143.194	199.056	149.489	277.734	140.834	12.5885	20.4563	33.8316	88.1196
100144	33.7154	2.02293	0.674309	1.34862	15.5091	0	12.8119	3.37154	7.4174	0	21.5779	1.34862	0.674309	28.321	16.8577	49.2245	16.8577	41.1328	50.5732	0.674309	24.9494	33.0411	3.37154	28.321	2.02293	36.4127	16.1834	28.321	0.674309	24.2751	3.37154	2.69724	8.76601	1.34862	9.44032	12.8119	71.4767	12.1376	41.8071	26.9724	27.6467	165.88	32.3668	86.9858	11.4633	61.3621	10.7889	13.4862	35.7384
100145	36.3528	0	1.78784	10.7271	53.0393	0	24.4338	109.654	44.1001	1.78784	17.2825	7.15137	0	1.78784	9.53516	18.4744	1.1919	0.595948	1.78784	40.5244	4.76758	0.595948	2.97974	41.7163	16.0906	6.55542	0.595948	35.7569	28.6055	51.8474	22.0501	3.57569	0.595948	30.3933	0	1.78784	144.219	38.7366	7.74732	69.7259	82.8367	50.6555	94.1597	215.137	186.532	42.9082	32.7771	14.8987	50.6555
100146	29.9309	0	3.06984	0	10.7444	6.13968	20.7214	0.76746	66.769	1.53492	3.8373	48.35	9.20952	43.7452	3.8373	62.1642	3.06984	5.37222	0	4.60476	9.20952	0	8.44206	42.2103	15.3492	13.8143	1.53492	24.5587	7.6746	21.4889	3.8373	14.5817	3.8373	3.06984	0	2.30238	10.7444	52.9547	4.60476	49.1174	163.469	30.6984	34.5357	63.6992	55.2571	14.5817	2.30238	40.6754	160.399
100147	95.4106	0	1.20773	0	22.9469	0	196.86	10.8696	4.83092	1.20773	70.0483	3.62319	0	60.3865	6.03865	22.9469	4.83092	1.20773	10.8696	56.7633	15.7005	49.5169	54.3478	20.5314	4.83092	6.03865	3.62319	18.1159	0	64.0097	0	3.62319	10.8696	54.3478	27.7778	3.62319	12.0773	1.20773	0	94.2029	172.705	19.3237	702.899	310.386	310.386	62.8019	16.9082	7.24638	163.043
100148	10.0251	1.50376	2.50627	2.00501	102.256	21.0526	11.5288	1.50376	28.0702	7.01754	8.5213	2.00501	0.501253	85.7143	20.5514	104.762	1.00251	1.50376	33.0827	10.5263	1.50376	12.0301	5.51378	13.0326	6.51629	27.0677	4.51128	10.0251	21.0526	22.0551	0.501253	19.5489	3.00752	10.5263	109.774	7.01754	15.5388	2.00501	13.0326	45.1128	83.208	20.0501	26.0652	99.2481	69.6742	0.501253	36.0902	11.0276	111.278
100149	4.63158	5.89474	7.15789	2.52632	20.2105	5.47368	15.5789	2.52632	4.21053	6.73684	51.3684	17.6842	21.4737	26.1053	2.10526	23.1579	20.2105	21.8947	8.42105	1.26316	3.78947	16.4211	11.7895	15.1579	4.21053	31.1579	1.26316	24.4211	0.421053	23.5789	2.52632	7.57895	164.632	19.3684	21.8947	4.63158	18.9474	19.7895	7.15789	40.4211	26.5263	18.9474	4.63158	59.7895	21.8947	5.89474	61.8947	9.26316	28.6316
100150	32.6442	6.52884	1.63221	7.07291	3.80849	5.4407	9.24918	9.24918	45.1578	14.1458	10.8814	1.08814	7.61697	18.4984	4.89663	34.2764	8.16104	1.08814	21.7628	21.2187	20.1306	11.9695	7.07291	20.1306	0	122.96	20.1306	11.4255	0.54407	29.9238	7.07291	3.80849	68.5528	16.8662	2.17628	3.26442	4.35256	7.61697	103.373	28.2916	123356	14.1458	263.33	44.6137	11.9695	60.9358	6.52884	26.6594	52.2307
100151	1.6909	3.38181	10.8218	0	0.676361	4.73453	81.1633	10.4836	50.7271	16.2327	16.2327	9.13088	1.01454	46.6689	10.8218	5.74907	13.189	7.43997	0.338181	4.05817	4.39635	18.9381	12.1745	27.0544	12.1745	33.8181	40.5817	29.7599	4.05817	26.0399	2.02908	1.35272	13.189	7.77815	17.2472	5.41089	28.7454	23.6726	29.0835	315.522	103868	69.6652	462.969	505.242	100.101	241.123	34.1562	12.5127	69.327
100152	3.17259	4.12437	0	1.90355	2.22081	2.53807	102.475	4.44162	8.88325	19.9873	17.4492	0.317259	10.7868	26.967	8.56599	9.20051	10.1523	5.3934	15.5457	4.75888	1.26904	11.7386	3.17259	11.1041	6.02792	37.1193	15.5457	9.83503	0.951777	24.1117	0.634518	4.12437	27.6015	3.48985	12.3731	16.4975	20.6218	14.5939	14.5939	399.429	39.3401	43.7817	24.4289	458.122	24.4289	12.6904	42.5127	12.6904	46.0025
100153	5.98802	0.998004	3.99202	5.98802	0.998004	11.976	152.695	9.98004	31.9361	60.8782	49.9002	0.998004	0	9.98004	22.9541	5.98802	135.729	8.98204	0	0.998004	5.98802	38.9222	0.998004	74.8503	59.8802	106.786	0	128.743	2.99401	120.758	4.99002	21.9561	1.99601	0.998004	0.998004	47.9042	14.9701	127.745	61.8762	479.042	430.14	123.752	48.9022	552.894	69.8603	10.978	13.9721	3.99202	137.725
100154	22.4663	0.499251	0	0	11.4828	5.49176	14.4783	41.9371	6.98952	8.98652	27.9581	0.499251	7.48877	59.9101	34.9476	15.976	5.99101	1.49775	4.99251	1.49775	5.49176	21.4678	19.4708	4.49326	3.49476	69.8952	2.99551	10.9835	0	14.9775	1.49775	2.99551	45.4319	11.4828	20.9685	8.48727	9.98502	14.4783	6.49026	47.9281	199492	138.293	734.898	412.881	135.297	459.311	63.4049	36.4453	70.3944
100155	2.36686	0	0	4.73373	1.18343	0	188.166	2.36686	34.3195	76.9231	8.28402	0	8.28402	36.6864	15.3846	3.5503	268.639	5.91716	0	49.7041	0	61.5385	0	59.1716	13.0178	81.6568	2.36686	386.982	0	113.609	18.9349	1.18343	9.46746	4.73373	0	3.5503	140.828	34.3195	54.4379	513.609	1719.53	205.917	85.2071	624.852	82.8402	20.1183	9.46746	1.18343	61.5385
100156	7.72532	0.429185	7.29614	0.858369	4.29185	3.86266	58.7983	7.29614	10.3004	11.588	21.03	0.429185	18.0258	16.7382	1.28755	19.3133	8.15451	5.15021	5.15021	6.43777	5.15021	19.7425	6.00858	16.309	3.00429	38.6266	12.0172	7.72532	0.858369	16.7382	3.00429	24.4635	91.4163	17.5966	3.00429	4.72103	6.00858	10.3004	23.176	181.974	604672	26.6094	242.489	257.082	33.4764	271.245	94.4206	98.7124	17.5966
100157	9.51684	8.78477	2.92826	2.92826	5.12445	2.19619	71.0102	13.1772	32.2108	14.6413	15.3734	0.732064	2.19619	9.51684	2.92826	9.51684	13.9092	5.12445	3.66032	2.92826	5.85652	6.58858	73.9385	5.85652	3.66032	14.6413	2.92826	19.0337	1.46413	32.9429	2.92826	2.19619	19.0337	2.92826	3.66032	7.32064	28.5505	18.3016	25.6223	219.619	46646.4	86.3836	47.5842	246.706	27.0864	32.2108	24.8902	35.1391	35.1391
100158	0	0	0	0	2.5	0	83.75	37.5	5	46.25	0	1.25	0	57.5	12.5	1.25	105	1.25	0	103.75	0	0	0	3.75	0	25	0	101.25	0	28.75	0	26.25	2.5	5	0	1.25	31.25	5	17.5	272.5	3205	188.75	390	817.5	196.25	17.5	468.75	33.75	203.75
100159	0.556483	0	0.556483	0	0	1.11297	22.8158	15.025	28.3806	43.9622	27.8242	0.556483	0	37.2844	16.138	5.00835	36.7279	2.78242	3.3389	12.2426	0	18.9204	0	28.9371	16.138	53.9789	31.7195	57.3178	0	117.974	0	11.6861	10.5732	0	14.4686	0.556483	11.6861	36.1714	32.276	64.552	65.1085	74.5687	55.6483	109.627	169.727	3.89538	7.23428	21.1464	67.3344
100160	9.01756	3.79687	0.474608	1.42383	1.89843	0.474608	11.3906	1.42383	27.5273	43.1894	37.9687	3.79687	2.84765	43.664	72.6151	28.4765	22.7812	40.8163	3.32226	4.74608	0.474608	22.7812	3.32226	15.1875	3.32226	69.2928	3.79687	28.9511	0	14.2383	0	14.7129	18.5097	9.96678	22.7812	4.74608	29.9003	28.0019	36.5449	31.3242	340.769	48.4101	9.96678	74.0389	28.0019	3.32226	6.16991	29.9003	53.1561
100161	5.71132	0	3.11526	1.55763	21.2876	1.55763	8.30737	10.3842	13.4995	7.26895	15.5763	7.78816	7.26895	50.8827	4.6729	33.7487	4.15369	1.03842	4.15369	6.74974	5.19211	19.73	5.71132	8.30737	2.59605	37.9024	3.11526	14.5379	1.03842	17.6532	1.03842	14.0187	54.5171	8.82658	0.519211	7.78816	3.63448	6.74974	56.594	19.73	5505.19	23.8837	53.9979	59.7092	19.2108	25.9605	36.3448	12.4611	29.0758
100162	24.2149	6.81044	1.51343	12.1075	12.8642	10.9724	43.5112	0.756716	25.7283	12.8642	18.5395	0.756716	7.94552	22.3231	10.2157	15.5127	1.13507	1.13507	4.16194	23.4582	3.40522	2.64851	3.78358	16.6477	1.51343	38.2142	3.40522	9.08059	1.89179	19.2963	2.64851	1.89179	12.8642	7.56716	7.56716	5.67537	24.5933	16.2694	100.643	123.723	12898.6	24.5933	73.0231	222.474	14.756	59.0238	1466.89	7.1888	27.2418
100163	24.2775	6.93642	1.92678	0.770713	2.31214	5.39499	10.4046	0.385356	69.7495	10.4046	22.736	1.92678	8.8632	19.2678	3.08285	16.9557	18.1118	2.6975	1.54143	10.0193	3.85356	4.23892	6.93642	93.2563	8.09249	30.0578	13.1021	30.0578	3.08285	23.1214	0.770713	2.31214	6.1657	3.85356	2.6975	41.6185	49.3256	5.39499	10.4046	21.58	33.526	34.6821	26.2042	79.7688	19.2678	12.7168	27.3603	10.4046	38.921
100164	18.548	2.64971	5.29942	0.529942	3.70959	3.70959	41.3355	5.82936	31.7965	16.4282	37.6259	4.23953	1.05988	10.5988	6.88924	5.29942	7.41918	3.70959	2.11977	5.82936	6.3593	2.64971	87.4404	19.6078	1.58983	49.8145	7.41918	13.7785	0	57.7636	1.58983	2.11977	9.00901	5.82936	6.88924	7.41918	8.47907	0.529942	75.7817	131.426	111.818	32.3264	14.8384	148.384	21.7276	14.3084	9.53895	2.64971	36.566
100165	36.2538	23.565	5.43807	7.85498	1.20846	4.83384	41.0876	7.25076	33.2326	13.8973	41.6918	3.02115	1.20846	96.0725	3.62538	6.64653	16.3142	6.0423	3.62538	8.45921	9.06344	15.71	5.43807	47.1299	9.66767	19.3353	6.0423	26.5861	0	45.3172	0	1.20846	9.66767	7.25076	7.25076	14.5015	17.5227	10.2719	13.8973	178.248	1911.78	49.5468	19.9396	161.934	18.1269	12.6888	14.5015	9.66767	38.0665
100166	11.4428	1.49254	2.98507	0.995025	7.46269	4.47761	21.393	0.995025	46.7662	12.9353	28.3582	1.49254	10.4478	16.4179	1.99005	15.9204	14.4279	3.48259	4.97512	4.47761	4.97512	13.9303	5.47264	10.9453	0	41.791	15.9204	14.9254	1.99005	29.3532	0	4.47761	12.9353	18.9055	6.96517	17.4129	8.95522	1.49254	57.2139	97.0149	35.8209	24.3781	16.4179	86.0697	21.393	12.4378	21.8905	20.398	7.46269
100167	9.37709	0.669792	4.68855	0.669792	9.37709	1.33958	7.36772	7.36772	12.0563	10.7167	21.4334	0.669792	0	66.3094	56.2626	10.0469	12.0563	3.34896	5.35834	2.00938	4.01875	32.15	160.75	26.7917	5.35834	58.9417	77.6959	13.3958	0	65.6397	0	10.7167	17.4146	4.68855	34.8292	8.7073	15.4052	4.01875	34.8292	20.0938	144688	18.7542	85.0636	44.8761	24.7823	81.0449	11.3865	1.33958	47.5553
100171	25.0305	18.315	6.10501	7.32601	3.0525	2.442	111.722	3.663	13.431	12.21	10.989	3.0525	0.610501	26.2515	12.21	15.873	13.431	4.2735	0.610501	5.49451	4.2735	3.0525	6.71551	26.2515	3.0525	25.641	4.884	16.4835	2.442	32.3565	1.221	11.5995	21.978	2.442	15.873	12.8205	25.0305	19.536	14.652	394.994	45.7875	53.1136	50.0611	484.737	36.63	48.84	14.652	6.71551	83.0281
100172	0	16.0428	0	0	0	0	260.963	2.13904	0	3.20856	0	0	0	113.369	86.631	1.06952	151.872	0	0	1.06952	0	2.13904	0	24.5989	0	10.6952	28.877	150.802	0	85.5615	52.4064	19.2513	0	0	70.5882	4.27807	22.4599	94.1176	24.5989	1004.28	185.027	181.818	145.455	1073.8	164.706	28.877	51.3369	3.20856	340.107
100173	6.40394	0.492611	1.47783	6.89655	1.47783	16.2562	13.7931	5.91133	28.0788	7.38916	38.9163	1.47783	3.94089	23.1527	4.92611	12.3153	10.3448	4.4335	4.92611	2.46305	2.95567	10.8374	0.985222	10.3448	9.35961	58.6207	10.8374	14.7783	0.985222	38.4236	5.91133	9.35961	8.867	54.1872	5.41872	13.3005	32.5123	15.7635	56.1576	42.8571	83546.3	60.0985	425.123	191.133	88.67	314.286	35.468	3.44828	61.0837
100174	2.50627	2.50627	3.7594	0	0	0	149.123	6.26566	2.50627	41.3534	0	0	1.25313	1.25313	176.692	3.7594	107.769	3.7594	0	42.6065	1.25313	308.271	0	33.8346	40.1003	1.25313	150.376	147.87	0	57.6441	0	13.7845	3.7594	0	0	0	662.907	162.907	30.0752	617.794	407.268	161.654	164.16	570.175	121.554	15.0376	26.3158	46.3659	258.145
100175	10.3627	4.31779	1.72712	1.72712	2.59067	3.45423	117.444	12.9534	37.9965	12.9534	12.0898	1.72712	2.59067	31.0881	11.2263	7.77202	31.9516	8.63558	0.863558	18.1347	10.3627	25.9067	299.655	31.9516	14.6805	25.0432	7.77202	23.3161	6.90846	37.133	0.863558	11.2263	0.863558	6.90846	15.544	6.90846	21.5889	4.31779	36.2694	463.731	8513.82	59.5855	41.4508	459.413	17.2712	13.8169	266.839	22.4525	138.169
100176	0.527148	7.90722	2.10859	0.527148	2.63574	0	105.957	10.0158	26.3574	21.6131	54.8234	0.527148	0	42.1719	7.90722	6.32578	70.6378	0	2.63574	13.7059	5.79863	68.0021	1.0543	46.389	0	46.389	1.58144	78.5451	0.527148	37.4275	3.16289	7.90722	1.0543	20.0316	0	8.43437	105.43	73.2736	25.8303	431.207	155.509	86.4523	11.0701	403.268	63.2578	10.0158	11.0701	7.38007	105.957
100179	3.46741	6.24133	0	3.46741	22.1914	6.93481	40.2219	13.1761	43.6893	24.2718	15.9501	1.38696	13.1761	31.2067	6.24133	19.4175	6.93481	2.08044	0	3.46741	4.16089	5.54785	14.5631	26.3523	2.08044	42.3024	11.7892	4.16089	0	51.3176	0.693481	4.16089	128.988	26.3523	9.70874	16.6436	7.62829	10.4022	25.6588	162.275	92.233	40.9154	35.3675	164.355	54.0915	11.0957	17.337	7.62829	2.77393
100182	28.2132	43.8871	0	0	2.08986	0	3.1348	0	31.348	11.4943	42.8422	1.04493	0	8.35946	9.40439	8.35946	22.9885	2.08986	1.04493	12.5392	3.1348	72.1003	3.1348	19.8537	10.4493	34.4828	1.04493	28.2132	16.7189	48.0669	4.17973	9.40439	14.629	13.5841	8.35946	8.35946	39.7074	33.4378	26.1233	0	19808.8	86.7294	135.841	91.954	37.6176	76.28	51.2017	45.977	76.28
100183	13.1165	3.14795	2.09864	24.659	5.24659	4.72193	0.524659	15.2151	13.1165	18.3631	121.721	3.14795	0	39.3494	18.3631	9.96852	2.62329	6.29591	0	38.3001	4.19727	33.5782	3.67261	10.4932	17.8384	34.1028	12.0672	11.5425	4.72193	40.3987	3.14795	3.14795	14.6905	50.8919	20.9864	7.34523	27.2823	7.34523	23.6097	0	74689.4	41.9727	81.3221	45.6453	16.2644	155.824	5.24659	3.14795	8.39454
100184	24.3129	0	0	2.11416	11.6279	13.7421	0	4.22833	22.1987	12.685	6.34249	9.51374	0	50.74	14.7992	56.0254	14.7992	2.11416	0	0	12.685	8.45666	0	31.7125	6.34249	30.6554	7.39958	13.7421	2.11416	23.2558	1.05708	5.28541	0	0	27.4841	7.39958	27.4841	11.6279	14.7992	0	12.685	63.4249	34.8837	47.5687	73.9958	9.51374	7.39958	22.1987	1.05708
100185	1.1655	0	1.1655	0	4.662	0	0	81.5851	6.99301	20.979	95.5711	2.331	0	9.32401	123.543	31.4685	156.177	1.1655	11.655	0	16.317	3.4965	1.1655	34.965	36.1305	166.667	55.9441	127.04	0	52.4476	2.331	15.1515	1.1655	20.979	1.1655	2.331	9.32401	0	38.4615	0	200.466	189.977	22.1445	31.4685	24.4755	26.8065	10.4895	17.4825	12.8205
100186	21.4158	1.78465	0	36.2879	1.78465	3.5693	1.18977	18.4414	34.5033	7.73349	14.2772	1.18977	3.5693	7.13861	29.7442	4.75907	26.1749	5.35396	4.75907	29.7442	3.5693	10.113	4.16419	29.7442	17.2516	52.3498	19.0363	18.4414	2.37954	29.1493	7.73349	10.7079	1.18977	14.2772	14.2772	20.8209	26.7698	11.3028	14.2772	0	251.041	50.5651	30.934	83.2838	33.9084	36.2879	19.0363	25.58	18.4414
100188	46.3499	4.63499	3.47625	3.47625	12.7462	0	0	15.0637	30.1275	11.5875	4.63499	13.905	1.15875	11.5875	17.3812	6.95249	19.6987	1.15875	2.3175	18.54	3.47625	6.95249	4.63499	71.8424	13.905	18.54	3.47625	75.3187	10.4287	38.2387	3.47625	5.79374	34.7625	2.3175	1.15875	13.905	23.175	41.7149	84.5886	0	81.1124	81.1124	56.7787	171.495	52.1437	3.47625	24.3337	34.7625	5.79374
100189	1.82815	0	43.8757	10.9689	3.65631	0	0	14.6252	9.14077	0	166.362	1.82815	16.4534	0	9.14077	23.766	0	1.82815	3.65631	5.48446	23.766	21.9378	0	1.82815	25.5941	63.9854	1.82815	7.31261	3.65631	76.7824	0	0	12.7971	166.362	3.65631	3.65631	7.31261	1.82815	1.82815	0	16.4534	9.14077	23.766	7.31261	9.14077	9.14077	5.48446	1.82815	7.31261
100190	12.3839	78.1734	1.54799	7.73994	3.86997	13.1579	2.32198	3.09598	40.2477	13.1579	52.6316	4.64396	20.1238	6.19195	0.773994	9.28793	23.2198	27.0898	4.64396	21.6718	2.32198	14.7059	8.51393	29.4118	0.773994	41.7957	12.3839	15.4799	0	14.7059	0.773994	6.19195	37.1517	3.09598	6.96594	10.8359	17.8019	1.54799	27.0898	0	31.7337	84.3653	53.4056	44.1176	7.73994	31.7337	8.51393	27.8638	16.2539
100191	21.3205	0.687758	0.687758	18.5695	0	1.37552	13.7552	24.0715	52.2696	7.56534	14.4429	1.37552	0.687758	20.6327	2.06327	7.56534	41.9532	0.687758	3.43879	56.3961	2.06327	17.1939	10.3164	40.5777	10.3164	47.4553	4.12655	23.3838	0.687758	20.6327	7.56534	15.1307	4.12655	6.18982	11.0041	13.7552	37.1389	16.5062	15.8184	0	2348.69	37.8267	44.0165	157.497	25.447	90.0963	17.8817	36.4512	4.12655
100192	28.6426	1.24533	33.6239	3.73599	8.71731	8.71731	0	0	14.944	4.98132	850.56	6.22665	53.5492	17.4346	14.944	1.24533	4.98132	3.73599	0	0	3.73599	38.6052	8.71731	6.22665	0	24.9066	44.8319	28.6426	0	22.4159	0	0	6.22665	8.71731	8.71731	3.73599	0	1.24533	9.96264	0	1.24533	8.71731	11.208	9.96264	1.24533	0	0	2.49066	1.24533
100193	300	38.1818	1.81818	16.3636	5.45455	0	3.63636	0	36.3636	20	43.6364	0	0	10.9091	1.81818	27.2727	0	0	0	14.5455	5.45455	12.7273	0	18.1818	3.63636	21.8182	3.63636	9.09091	0	7.27273	1.81818	3.63636	18.1818	165.455	18.1818	3.63636	0	0	3.63636	0	5.45455	65.4545	5.45455	43.6364	14.5455	14.5455	0	5.45455	3.63636
100194	7.94852	0	4.16351	1.1355	28.7661	2.27101	4.92051	2.64951	44.6631	1.1355	43.5276	4.16351	4.16351	63.9667	3.02801	20.4391	2.64951	6.81302	43.1491	1.1355	31.7941	11.7335	5.29902	63.2097	1.514	90.4618	12.4905	10.598	0	51.0977	1.1355	15.5185	52.9902	4.92051	8.32702	4.16351	10.9765	0	55.2612	0	24.2241	4.54201	1.1355	3.78501	7.19152	1.89251	0	3.78501	4.92051
100196	16.6667	17.7778	4.44444	1.11111	6.66667	2.22222	0	0	18.8889	2.22222	54.4444	0	1.11111	27.7778	4.44444	10	1.11111	1.11111	0	7.77778	8.88889	6.66667	4.44444	67.7778	0	80	0	18.8889	0	48.8889	1.11111	5.55556	173.333	24.4444	11.1111	7.77778	21.1111	4.44444	37.7778	0	412.222	24.4444	6.66667	5.55556	7.77778	18.8889	7.77778	10	13.3333
100197	55.7185	0.733138	2.93255	0.733138	26.393	8.06452	0	56.4516	9.53079	0	64.5161	5.13196	3.66569	0.733138	0	4.39883	5.13196	5.13196	0	79.1789	6.59824	4.39883	84.3109	18.3284	32.9912	20.5279	0.733138	28.5924	0	44.7214	2.93255	5.8651	29.3255	8.06452	13.9296	0.733138	41.0557	24.9267	55.7185	0	71.1144	57.9179	69.6481	147.361	63.783	116.569	30.7918	1.46628	5.13196
100198	121.42	0	1.71821	5.15464	8.01833	5.72738	0	6.30011	12.0275	32.646	11.4548	6.30011	4.5819	38.3734	2.86369	10.882	2.29095	9.1638	1.71821	12.0275	17.1821	14.3184	6.30011	36.0825	0.572738	24.055	0	27.4914	0	9.1638	0	4.5819	2.86369	1.71821	18.3276	2.29095	22.3368	34.3643	6.30011	0	38.3734	34.3643	17.1821	79.6105	46.9645	33.7915	24.055	16.0367	6.30011
100199	12.0946	8.79604	9.34579	0	17.0423	15.9428	0.549753	2.19901	23.0896	5.49753	20.3408	2.19901	7.69654	59.3733	51.6767	14.8433	3.29852	5.49753	6.59703	4.39802	28.5871	18.1418	5.49753	4.94777	8.79604	33.5349	10.4453	4.94777	0.549753	13.7438	4.94777	1.09951	26.3881	3.84827	15.9428	19.7911	14.2936	12.0946	25.2886	0	83545.4	25.2886	59.923	29.1369	34.0847	37.9329	219.351	8.79604	4.94777
100200	11.9166	16.8818	9.93049	7.94439	12.9096	14.8957	0	151.936	13.9027	3.97219	19.861	0.993049	1.9861	27.8054	17.8749	15.8888	12.9096	0.993049	11.9166	36.7428	9.93049	4.96524	3.97219	8.93744	2.97915	17.8749	6.95134	8.93744	3.97219	10.9235	0	10.9235	19.861	5.95829	8.93744	7.94439	22.8401	3.97219	35.7498	0	38335.7	29.7915	49.6524	83.4161	24.8262	105.263	26.8123	13.9027	7.94439
100203	57.1956	1.47601	0.738007	22.5092	1.10701	11.0701	5.53506	2.21402	12.5461	3.69004	14.3911	2.21402	5.90406	14.7601	16.2362	2.58303	18.4502	4.05904	10.7011	47.6015	7.01107	19.9262	1.10701	40.2214	4.79705	35.0554	59.7786	30.6273	1.10701	21.7712	1.10701	10.3321	19.1882	23.6162	8.85609	5.16605	35.0554	32.8413	32.8413	0	16600.7	84.5018	55.7196	100	65.6827	95.203	25.4613	48.3395	10.3321
100204	11.7978	0.561798	2.24719	0.561798	5.61798	14.6067	1.68539	8.42697	21.3483	2.80899	34.8315	2.80899	10.1124	26.4045	7.30337	10.6742	1.68539	0	1.1236	12.3596	5.61798	61.7978	8.42697	17.9775	5.05618	27.5281	36.5169	5.05618	0.561798	25.8427	3.37079	18.5393	222.472	60.6742	8.98876	5.05618	7.30337	14.0449	25.2809	0	273088	33.7079	139.888	68.5393	84.8315	139.326	35.9551	57.3034	6.74157
100207	11.022	24.0481	1.002	1.002	13.0261	4.00802	2.00401	2.00401	1.002	15.0301	10.02	13.0261	2.00401	16.0321	3.00601	4.00802	22.0441	7.01403	22.0441	7.01403	10.02	5.01002	6.01202	4.00802	11.022	43.0862	6.01202	34.0681	0	35.0701	5.01002	8.01603	76.1523	7.01403	5.01002	7.01403	15.0301	50.1002	15.0301	0	178105	60.1202	79.1583	47.0942	59.1182	132.265	126.253	23.0461	10.02
100208	4.0568	43.2725	2.0284	39.2157	8.11359	8.11359	1.35227	1.35227	24.3408	10.142	20.9601	1.35227	10.8181	15.551	0	6.76133	20.9601	14.8749	0.676133	52.0622	2.0284	7.43746	4.0568	29.7498	4.0568	16.9033	6.08519	18.2556	2.0284	12.1704	0	21.6362	15.551	19.6078	0	3.38066	58.1474	12.8465	14.1988	0	14144	79.7836	136.579	174.442	20.9601	36.5112	9356.32	94.6586	7.43746
100210	58.5959	0	12.1614	5.52792	1.65837	5.52792	1.65837	3.31675	19.3477	11.6086	59.7015	1.65837	32.0619	30.9563	1.10558	2.76396	17.6893	2.76396	3.86954	25.9812	7.18629	4.42233	24.3228	56.3847	1.65837	101.161	13.267	71.3101	0	13.8198	0	2.21117	39.801	16.031	4.42233	39.2482	0.552792	0.552792	114.981	0	3.86954	26.534	2.76396	38.1426	4.42233	5.52792	0.552792	14.9254	6.08071
100211	5.22317	0.949668	0.949668	0.949668	43.6847	1.89934	24.6914	3.79867	16.1443	3.79867	19.4682	4.2735	9.02184	71.2251	1.4245	58.8794	2.849	3.32384	38.4615	9.97151	1.89934	1.89934	1.4245	38.4615	5.69801	36.5622	33.2384	5.22317	2.849	26.5907	2.849	9.02184	54.1311	187.559	44.1595	16.6192	9.97151	7.12251	88.3191	84.9953	86.8946	11.396	7.59734	137.702	65.5271	27.5404	15.1947	112.061	66.0019
100212	5.52486	0	0	0	3.68324	0	68.14	160.221	60.7735	0	1.84162	73.6648	0	16.5746	0	7.36648	36.8324	0	1.84162	0	9.2081	0	58.9319	9.2081	7.36648	3.68324	0	116.022	3.68324	33.1492	0	31.3076	9.2081	69.9816	0	5.52486	220.994	176.796	38.674	191.529	130.755	64.4567	337.017	521.179	290.976	3.68324	139.963	18.4162	149.171
100213	9.55414	4.24628	18.0467	1.06157	278.132	13.8004	8.49257	1.06157	37.155	0	13.8004	3.18471	2.12314	18.0467	3.18471	21.2314	2.12314	8.49257	4.24628	21.2314	8.49257	5.30786	2.12314	36.0934	0	10.6157	0	11.6773	5.30786	26.5393	0	1.06157	62.6327	27.6008	2.12314	7.431	22.293	5.30786	4.24628	64.7558	14532.9	27.6008	76.4331	101.911	9.55414	59.448	59.448	29.724	94.4798
100214	33.1695	0	0	1.84275	0.614251	4.914	28.2555	6.14251	17.199	3.6855	72.4816	10.4423	1.2285	62.0393	4.29975	12.285	2.457	11.6708	0.614251	17.199	15.3563	23.3415	18.4275	17.199	0.614251	13.5135	0.614251	6.14251	0.614251	62.0393	12.285	6.14251	60.1966	7.98526	17.8133	21.4988	39.9263	4.29975	50.3686	54.6683	135.135	37.4693	41.1548	83.5381	48.5258	14.1278	15.9705	9.21376	78.6241
100215	54.6647	5.10204	5.10204	2.18659	8.74636	10.9329	25.5102	17.4927	20.4082	2.91545	56.8513	86.7347	0	91.8367	1.45773	42.2741	4.37318	5.10204	10.9329	11.6618	28.4257	9.47522	5.8309	8.74636	2.18659	21.8659	0.728863	12.3907	7.28863	21.8659	3.64431	5.8309	4.37318	5.10204	3.64431	1.45773	7.28863	5.8309	62.6822	75.0729	71.4286	131.195	35.7143	227.405	382.653	53.207	4.37318	132.653	100.583
100216	3.19781	0	1.37049	1.82732	4.11147	7.7661	10.0503	1.37049	32.4349	4.11147	39.7442	5.02513	5.02513	39.7442	14.6185	28.3234	15.0754	3.65464	21.9278	1.37049	10.0503	17.8164	16.9027	1.37049	1.37049	45.683	0.45683	16.4459	0.45683	53.4491	2.28415	12.7912	4.5683	1.37049	15.0754	22.3847	15.0754	17.8164	39.2873	36.0895	51970.3	31.0644	140.247	67.6108	9.59342	25.1256	5.48196	10.9639	57.1037
100217	2.80584	2.80584	0.561167	5.61167	1.6835	1.12233	19.6409	24.1302	106.622	4.48934	51.6274	0	0.561167	12.3457	5.05051	28.6195	23.0079	0.561167	46.5769	6.17284	8.41751	11.2233	5.05051	49.3827	21.8855	17.3962	2.24467	25.2525	1.12233	66.2177	1.6835	6.17284	1.12233	2.24467	11.7845	1.6835	12.9068	28.6195	37.037	53.8721	51.6274	76.8799	39.2817	139.169	51.0662	24.6914	31.9865	19.0797	37.5982
100218	31.7003	17.2911	0	5.352	8.23384	0.411692	6.17538	0.411692	11.9391	11.5274	2.05846	2.47015	6.17538	31.2886	16.4677	26.3483	5.76369	22.6431	4.9403	6.58707	0.823384	11.9391	9.05723	69.576	1.23508	8.64553	15.6443	12.3508	2.05846	11.1157	2.05846	3.70523	15.2326	93.8658	5.76369	0.411692	6.99876	3.29354	2.88184	18.5261	25.9366	15.2326	22.2314	61.3421	16.8794	2.88184	19.7612	18.9378	47.3446
100220	3.58295	2.14977	3.58295	3.22465	8.59907	2.14977	17.1981	2.14977	46.9366	6.09101	18.273	0.716589	7.52418	6.4493	1.07488	42.2788	4.65783	1.43318	2.14977	5.37442	2.14977	6.09101	2.50806	16.1233	2.86636	20.0645	12.182	14.6901	12.5403	40.129	2.86636	1.43318	4.65783	7.52418	3.58295	21.4977	35.8295	14.3318	26.8721	41.5622	36.546	48.7281	43.7119	61.985	20.7811	10.7488	24.0057	10.3905	40.4873
100221	41.8919	4.05405	0	5.40541	6.75676	0	32.4324	6.75676	8.10811	0	4.05405	58.1081	0	114.865	21.6216	63.5135	2.7027	0	1.35135	0	55.4054	79.7297	68.9189	9.45946	1.35135	6.75676	5.40541	36.4865	0	110.811	12.1622	5.40541	4.05405	17.5676	79.7297	1.35135	10.8108	22.973	27.027	220.27	536.486	106.757	45.9459	420.27	90.5405	9.45946	33.7838	105.405	221.622
100222	18.315	0	0	0	1377.29	7.32601	14.652	0	10.989	3.663	3.663	3.663	0	18.315	7.32601	0	18.315	3.663	1234.43	29.304	3.663	25.641	0	32.967	14.652	3.663	0	32.967	0	7.32601	0	3.663	0	0	29.304	18.315	51.2821	7.32601	3.663	62.2711	10.989	25.641	54.9451	157.509	80.5861	25.641	21.978	7.32601	366.3
100223	47.1182	10.9382	0	15.5658	2.94489	6.31048	14.7244	1.2621	73.6222	8.41397	23.9798	1.2621	0	10.0968	4.20698	15.9865	0.841397	3.36559	27.3454	38.7042	2.52419	5.04838	5.46908	44.594	8.83467	25.2419	1.2621	14.7244	18.9314	50.9045	13.0416	4.62768	4.20698	0.841397	3.36559	0.841397	39.9663	14.7244	45.4354	32.3938	23680.3	27.3454	83.719	161.548	14.3037	71.098	16.4072	9.67606	57.6357
100224	7.3193	1.82983	1.82983	0	7.3193	9.14913	28.3623	0	76.8527	6.40439	5.48948	0	0	1.82983	0	16.4684	19.2132	0.914913	48.4904	20.1281	1.82983	3.65965	0.914913	39.3413	0	16.4684	5.48948	31.107	9.14913	11.8939	8.23422	1.82983	0.914913	0.914913	0	10.064	11.8939	17.3833	12.8088	77.7676	75.9378	13.7237	61.2992	134.492	26.5325	3.65965	12.8088	8.23422	129.918
100225	0	0.819672	4.91803	0.819672	48.3607	0	20.4918	0.819672	64.7541	0	15.5738	2.45902	0	1.63934	2.45902	0.819672	7.37705	8.19672	31.1475	0.819672	4.09836	3.27869	77.8689	78.6885	24.5902	22.1311	0	72.9508	0.819672	34.4262	40.1639	0.819672	0	9.83607	0	0.819672	77.0492	6.55738	1.63934	59.0164	31.9672	35.2459	58.1967	127.049	31.1475	63.1148	58.1967	0	100.82
100226	7.54361	0	0	0.942951	26.8741	3.77181	16.0302	3.30033	120.226	4.71476	17.4446	0	0	6.12918	9.90099	8.95804	4.71476	12.7298	201.32	14.6157	4.71476	23.5738	10.8439	14.6157	6.12918	26.4026	16.0302	68.364	45.2617	30.6459	3.30033	5.65771	9.90099	2.35738	8.95804	3.30033	249.882	27.8171	12.7298	30.6459	90.0519	25.4597	25.4597	63.1777	23.1023	41.9613	7.54361	5.65771	92.4092
100227	14.4231	5.76923	3.84615	0.480769	1.44231	2.88462	21.1538	4.32692	32.2115	8.65385	55.7692	2.40385	1.44231	22.5962	2.88462	3.84615	0.961538	6.73077	1.44231	0	1.92308	14.4231	7.69231	54.8077	3.36538	51.4423	13.4615	15.3846	0.480769	42.3077	10.0962	25.9615	24.0385	1.44231	12.5	0.961538	13.9423	10.5769	22.1154	55.7692	17.7885	36.5385	21.1538	68.75	18.75	9.61538	9.13462	8.65385	50.4808
100228	30.5499	4.07332	0	11.5411	4.07332	5.43109	33.2654	3.39443	44.1276	5.43109	38.6965	10.1833	0.678887	2.03666	5.43109	8.82553	4.07332	4.75221	6.10998	23.0821	6.78887	15.6144	6.78887	14.2566	3.39443	38.0177	87.5764	9.50441	5.43109	29.1921	2.03666	4.07332	0.678887	21.7244	4.07332	15.6144	38.6965	7.46775	5.43109	69.2464	20698.6	64.4942	215.207	141.887	124.236	64.4942	80.1086	112.016	164.969
100229	19.4175	0	0	8.62999	20.4962	20.4962	69.0399	2.1575	0	0	9.70874	36.6775	0	14.0237	4.31499	44.2287	0	10.7875	0	0	22.6537	10.7875	10.7875	3.23625	2.1575	20.4962	0	21.575	16.1812	10.7875	0	28.0475	22.6537	8.62999	6.47249	2.1575	26.9687	10.7875	1.07875	108.954	101.402	50.7012	111.111	112.19	114.347	71.1974	24.8112	47.4649	133.765
100230	20.9524	0	0	9.52381	0	2.85714	19.0476	5.71429	78.0952	8.57143	2.85714	0.952381	0	11.4286	1.90476	134.286	23.8095	6.66667	4.7619	33.3333	5.71429	3.80952	324.762	16.1905	16.1905	15.2381	18.0952	20.9524	0	66.6667	5.71429	6.66667	0.952381	5.71429	10.4762	16.1905	24.7619	32.381	14.2857	42.8571	290.476	102.857	80	146.667	43.8095	5.71429	105.714	12.381	107.619
100231	25.0545	9.80392	3.81264	14.1612	3.26797	8.16993	23.4205	0.544662	78.976	1.08932	5.44662	1.08932	0.544662	11.9826	21.2418	16.3399	2.17865	0	11.4379	32.6797	2.17865	4.3573	16.8845	11.4379	1.08932	17.9739	68.0828	22.8758	1.63399	37.037	1.08932	18.5185	1.63399	32.6797	39.2157	5.99129	16.8845	4.3573	9.25926	34.8584	4809.37	19.0632	48.4749	111.111	26.1438	9.25926	36.4924	22.8758	63.1808
100232	22.7273	12.285	1.84275	0	4.29975	15.9705	11.6708	0.614251	23.9558	3.07125	30.7125	10.4423	18.4275	63.2678	4.29975	13.5135	1.2285	7.37101	41.1548	9.21376	27.027	1.2285	2.457	6.14251	3.6855	21.4988	1.2285	9.21376	1.84275	19.0418	1.84275	3.07125	36.855	14.1278	1.84275	3.6855	38.6978	9.21376	7.98526	20.8845	19.656	14.1278	8.59951	48.5258	13.5135	14.1278	26.4128	16.5848	111.179
100233	12.1495	14.9533	9.34579	3.73832	11.215	4.20561	22.4299	0.46729	21.4953	4.20561	21.9626	6.07477	4.6729	20.0935	7.47664	15.8879	2.33645	0.46729	2.80374	1.40187	2.80374	9.81308	23.8318	10.7477	0.934579	19.6262	32.243	13.0841	2.33645	16.8224	3.73832	3.73832	21.028	1.86916	3.73832	148.131	10.7477	7.47664	13.5514	67.757	229.907	13.0841	30.8411	272.897	158.411	14.0187	16.3551	23.8318	80.3738
100234	28.5132	2.03666	3.05499	0	4.07332	4.07332	24.4399	6.10998	54.9898	3.05499	14.2566	1.01833	1.01833	8.14664	0	19.3483	0	0	6.10998	62.1181	5.09165	5.09165	6.10998	42.7699	2.03666	10.1833	11.2016	15.2749	18.3299	42.7699	8.14664	2.03666	5.09165	6.10998	0	12.22	81.4664	27.4949	8.14664	73.3198	1012.22	25.4582	32.5866	179.226	8.14664	30.5499	28.5132	18.3299	101.833
100235	0	3.62319	1.81159	38.0435	18.1159	0.905797	10.8696	58.8768	199.275	2.71739	201.993	8.15217	0.905797	3.62319	4.52899	47.1014	7.24638	0	0.905797	8.15217	7.24638	9.05797	19.9275	154.891	9.96377	25.3623	6.34058	116.848	4.52899	30.7971	4.52899	9.05797	16.3043	5.43478	0	181.159	31.7029	21.7391	3.62319	28.0797	3777.17	17.2101	80.6159	117.754	56.1594	9.96377	196.558	1.81159	67.029
100236	0	0	0.940734	2.8222	6.58514	0	23.5183	0	20.6961	1.88147	4.70367	2.8222	0	7.52587	0.940734	71.4958	0	4.70367	32.9257	2.8222	3.76294	1.88147	26.3405	34.8071	0.940734	9.40734	0	8.4666	1.88147	25.3998	8.4666	0	7.52587	53.6218	1.88147	21.6369	23.5183	1.88147	4.70367	51.7404	26.3405	31.0442	23.5183	104.421	21.6369	9.40734	8.4666	3.76294	93.1326
100237	5.5517	0	1.38793	29.8404	1.38793	2.08189	24.9827	0.693963	133.241	1.38793	26.3706	11.1034	0	11.1034	2.77585	18.043	40.9438	3.46981	2.77585	27.7585	12.4913	6.24566	5.5517	24.9827	2.77585	20.8189	3.46981	6.24566	2.08189	37.474	4.16378	0.693963	2.08189	2.08189	4.85774	3.46981	52.7412	4.16378	18.043	27.0645	15.9611	52.7412	15.2672	85.3574	254.684	13.1853	13.1853	47.1895	57.5989
100238	6.36605	2.65252	8.48806	16.9761	15.3846	4.77454	9.54907	0	30.2387	29.7082	10.0796	23.8727	11.6711	10.6101	28.1167	25.4642	4.77454	5.83554	21.7507	11.1406	9.54907	29.1777	2.12202	35.5438	2.12202	9.54907	4.24403	10.6101	1.59151	13.2626	1.06101	3.71353	5.83554	17.5066	2.65252	4.24403	9.54907	6.89655	3.18302	21.7507	4.77454	53.0504	19.6286	73.2095	8.48806	9.54907	39.2573	1.59151	35.0133
100239	13.1859	0	1.7014	0	11.9098	4.67886	7.65632	8.93237	13.1859	2.55211	31.9013	12.3352	3.40281	63.3773	7.23097	6.38026	9.78307	7.23097	0	8.08167	0.850702	11.4845	10.2084	28.9239	25.9464	20.4168	1.7014	20.8422	0	13.1859	2.55211	2.12675	31.9013	2.12675	23.3943	1.27605	27.6478	18.7154	22.9689	25.5211	109.741	45.0872	33.6027	99.9575	29.7746	33.1774	36.5802	13.1859	68.4815
100241	2.85388	0.570776	3.42466	22.2603	1.14155	3.42466	11.9863	2.28311	33.6758	3.99543	48.516	1.71233	0	15.9817	9.7032	11.4155	9.7032	4.56621	21.6895	19.4064	5.13699	8.56164	1.71233	33.105	2.85388	35.9589	5.13699	5.70776	5.70776	35.9589	10.8447	1.14155	2.85388	15.9817	9.13242	1.14155	33.6758	3.99543	29.1096	31.9635	17153.5	32.5342	23.4018	67.9224	10.8447	45.6621	20.5479	20.5479	72.4886
100242	7.31183	10.3226	3.87097	9.89247	1.29032	2.15054	15.914	0.860215	33.1183	19.7849	21.9355	0.430108	5.5914	21.5054	6.45161	17.6344	21.5054	8.17204	8.17204	5.16129	1.29032	13.3333	10.7527	49.0323	11.1828	21.0753	3.01075	6.45161	1.72043	31.828	5.16129	1.29032	9.03226	22.7957	2.58065	4.30108	11.6129	12.9032	24.086	56.7742	23.6559	20.2151	65.8065	67.957	40.8602	12.4731	48.172	10.3226	87.3118
100243	54.8272	0	2.38379	91.7759	51.2515	0	46.4839	13.1108	4.76758	0	22.646	2.38379	0	9.53516	8.34327	19.0703	7.15137	0	1.1919	76.2813	8.34327	19.0703	3.57569	3.57569	9.53516	35.7569	4.76758	51.2515	15.4946	45.292	22.646	4.76758	13.1108	7.15137	0	0	15.4946	3.57569	1.1919	82.2408	65.5542	113.23	27.4136	170.441	76.2813	16.6865	39.3325	92.9678	110.846
100244	35.4567	15.024	0.600962	27.6442	24.6394	1.80288	16.8269	0	38.4615	1.80288	14.4231	7.8125	0	10.2163	4.80769	4.20673	8.41346	0.600962	22.2356	39.0625	3.00481	4.20673	5.40865	16.8269	2.40385	24.0385	10.2163	15.024	4.20673	15.024	1.20192	0.600962	1.20192	29.4471	3.60577	4.20673	51.6827	12.0192	15.024	37.2596	30.649	61.2981	48.0769	122.596	30.649	55.8894	18.6298	60.0962	40.8654
100245	81.448	4.52489	0	4.52489	11.3122	0	244.344	13.5747	11.3122	0	4.52489	85.9729	0	18.0995	4.52489	52.0362	4.52489	2.26244	0	0	13.5747	2.26244	0	0	9.04977	13.5747	0	22.6244	2.26244	29.4118	6.78733	4.52489	11.3122	9.04977	0	6.78733	15.8371	58.8235	22.6244	223.982	104.072	63.3484	20.362	253.394	717.195	6.78733	18.0995	135.747	248.869
100246	48.6169	0	0.838223	96.3956	15.088	0	32.6907	34.3671	12.5733	1.67645	12.5733	0.838223	0	4.19111	12.5733	0.838223	51.1316	8.38223	0.838223	105.616	10.8969	25.9849	1.67645	10.0587	51.9698	10.8969	7.54401	72.0872	0	86.337	20.9556	0	0.838223	1.67645	5.02934	3.35289	10.8969	88.0134	8.38223	97.2339	63.7049	123.219	61.1903	276.614	37.72	5.86756	27.6614	92.2045	63.7049
100247	22.6382	40.9229	3.04745	19.5908	1.7414	7.40096	16.5433	0	29.1685	2.17675	38.3108	3.4828	0	3.4828	3.4828	54.4188	0.43535	1.30605	26.121	36.5694	0.43535	6.53026	17.8494	15.2373	0.43535	34.828	3.4828	24.3796	4.3535	14.3666	5.22421	2.17675	1.7414	67.4793	0	5.22421	30.9099	22.2029	2.17675	47.4532	36.1341	79.2338	37.0048	200.697	28.2978	31.7806	54.8542	23.5089	76.6217
100248	3.69822	1.47929	0.739645	48.8166	2.95858	0.739645	19.2308	2.95858	110.947	2.95858	31.8047	3.69822	0	6.6568	8.13609	8.87574	8.13609	5.91716	0	80.6213	1.47929	25.1479	5.91716	73.9645	11.0947	15.5325	17.7515	47.3373	5.17751	30.3254	28.1065	4.43787	4.43787	0.739645	0	4.43787	90.9763	84.3195	2.95858	45.858	59.1716	92.4556	81.3609	171.598	139.793	138.314	27.3669	39.2012	156.065
100249	15.8133	0.753012	0	10.5422	19.5783	1.50602	27.1084	8.28313	33.8855	0	33.1325	3.01205	0	11.2952	12.8012	4.51807	3.76506	0.753012	3.76506	12.0482	6.77711	6.77711	2.25904	11.2952	6.0241	23.3434	6.77711	18.8253	0	45.1807	5.27108	0.753012	0.753012	12.0482	2.25904	3.76506	12.8012	7.53012	54.2169	29.3675	38.4036	27.8614	16.5663	95.6325	33.1325	57.2289	25.6024	17.3193	44.4277
100250	210.663	1.95059	1.95059	7.80234	4.55137	5.20156	18.2055	3.25098	34.4603	0.650195	22.1066	0	1.30039	14.9545	0.650195	29.2588	3.90117	1.30039	18.2055	15.6047	2.60078	1.95059	12.3537	27.9584	3.90117	18.2055	4.55137	11.0533	5.20156	14.9545	3.25098	3.90117	20.8062	33.1599	5.20156	1.95059	7.80234	8.45254	106.632	47.4642	27.3082	85.1756	18.2055	165.15	21.4564	13.6541	21.4564	57.2172	111.834
100251	39.1784	1.14112	1.14112	1.14112	12.9327	9.12895	19.7794	5.70559	13.313	6.84671	14.4542	7.98783	4.94485	20.9205	3.42335	17.8775	3.80373	3.42335	20.9205	10.6504	5.32522	11.4112	2.66261	14.0738	15.9757	16.7364	15.5953	17.1168	0	15.9757	4.56447	3.42335	29.6691	20.9205	13.6934	38.0373	5.32522	7.22708	23.9635	33.8532	17.8775	15.9757	16.356	109.167	24.3439	13.313	1.14112	11.0308	78.3568
100252	19.3462	12.6751	2.00133	6.67111	2.00133	11.3409	26.6845	2.66845	18.012	5.33689	20.6805	3.33556	8.00534	33.3556	16.0107	28.6858	4.00267	4.66978	33.3556	14.0093	18.6791	3.33556	4.00267	28.0187	5.33689	12.008	20.6805	9.33956	6.004	7.33823	4.66978	0	34.0227	18.6791	4.00267	2.00133	14.6765	0	11.3409	62.0414	13.3422	46.0307	23.3489	120.08	8.00534	10.6738	135.424	16.0107	36.6911
100253	12.7198	7.48223	3.74111	10.8492	7.85634	14.5903	6.73401	8.23045	25.4396	1.12233	20.202	1.49645	18.3315	8.60456	0	28.8066	10.8492	1.87056	5.23756	16.835	22.4467	6.73401	2.24467	8.97868	1.87056	8.60456	15.3386	8.60456	0	12.3457	0.748223	4.86345	71.4553	38.9076	19.0797	5.23756	34.0441	47.5122	32.5477	13.8421	5170.22	377.853	2365.51	1324.35	870.557	1716.8	164.609	80.0599	68.0883
100254	87.4891	0	1.74978	0	1.74978	0.874891	27.1216	0.874891	35.8705	0	37.6203	8.74891	0	6.99913	0	41.9948	9.6238	11.3736	0	6.12423	10.4987	19.2476	3.49956	27.1216	15.748	55.993	0.874891	20.9974	0	27.1216	20.1225	20.9974	1.74978	0.874891	0	0	9.6238	27.9965	25.3718	91.8635	45.4943	66.4917	45.4943	173.228	29.7463	27.1216	163.605	27.9965	146.982
100255	88.9734	0	1.52091	41.8251	2.28137	7.60456	19.7719	7.60456	44.1065	0	41.0646	0	0	3.04183	1.52091	5.32319	21.2928	15.2091	40.3042	95.057	9.88593	0	4.56274	27.3764	5.32319	9.12548	2.28137	16.73	21.2928	15.9696	25.0951	8.36502	1.52091	34.981	0	3.04183	50.9506	2.28137	28.1369	64.6388	53.2319	54.7529	38.0228	150.57	12.1673	62.3574	9.12548	46.3878	144.487
100256	2.03874	69.317	7.13558	2.03874	8.15494	16.3099	19.368	0	44.8522	0	12.2324	8.15494	1.01937	11.213	59.1233	29.5617	3.0581	1.01937	4.07747	6.11621	8.15494	5.09684	449.541	16.3099	1.01937	27.5229	1.01937	13.2518	4.07747	14.2712	0	2.03874	12.2324	13.2518	3.0581	10.1937	21.4067	37.7166	10.1937	51.9878	83.5882	22.4261	83.5882	152.905	13.2518	4.07747	4.07747	11.213	57.0846
100257	9.375	4.91071	5.35714	6.69643	4.91071	12.9464	16.5179	0	37.5	5.35714	56.25	10.2679	1.78571	32.5893	0	13.3929	7.58929	3.57143	1.33929	26.3393	8.03571	3.57143	4.01786	19.1964	2.23214	75.8929	2.67857	38.8393	2.67857	15.1786	2.67857	1.33929	6.25	52.6786	4.01786	12.5	6.25	8.92857	20.9821	50.8929	52385.3	25.4464	25.4464	97.3214	29.9107	66.0714	52.2321	24.5536	50
100258	3.37268	12.226	1.26476	41.3153	2.9511	7.16695	15.1771	0	29.0894	12.6476	26.1383	4.63744	9.27487	3.79427	19.3929	24.4519	16.0202	21.5008	2.52951	32.0405	6.32378	2.52951	5.48061	21.5008	5.05902	11.3828	2.9511	12.6476	4.21585	9.27487	0.84317	5.48061	24.4519	18.9713	2.52951	0.84317	21.5008	8.01012	19.8145	29.9325	56.0708	55.2277	38.7858	88.9545	8.85329	4.21585	8.85329	18.5497	40.0506
100259	59.6252	69.8467	1.70358	87.7342	15.3322	17.0358	32.368	1.70358	24.7019	1.70358	45.1448	6.81431	2.55537	22.9983	9.36968	4.25894	49.4037	0.851789	11.0733	107.325	5.96252	21.2947	1.70358	28.109	0	43.4412	2.55537	4.25894	8.51789	20.4429	5.11073	10.2215	2.55537	314.31	2.55537	8.51789	21.2947	18.7394	9.36968	72.402	206.133	126.065	114.14	247.019	34.0716	15.3322	45.9966	111.584	73.2538
100260	11.2994	2.82486	6.35593	10.5932	2.11864	2.82486	57.9096	2.11864	41.6667	4.9435	26.8362	4.9435	0	9.18079	4.23729	78.3898	6.35593	0	0	17.6554	4.9435	11.2994	0.706215	16.2429	0	31.0734	33.1921	4.9435	0	50.1412	2.82486	1.41243	5.64972	1.41243	0	5.64972	21.8927	5.64972	44.4915	52.9661	48.0226	41.6667	42.3729	86.8644	38.1356	28.2486	23.3051	48.7288	62.8531
100261	123.33	26.7215	3.08325	54.4707	0	13.3607	10.2775	2.0555	62.6927	4.111	8.22199	3.08325	1.02775	7.19424	10.2775	18.4995	1.02775	3.08325	11.3052	68.8592	1.02775	2.0555	0	18.4995	5.13875	17.4717	3.08325	8.22199	15.4162	9.24974	12.333	0	6.1665	36.999	7.19424	4.111	26.7215	3.08325	1.02775	53.443	50.3597	97.6362	35.9712	160.329	24.666	13.3607	24.666	51.3875	137.718
100262	1.0917	1.63755	0	11.4629	4.91266	6.00437	23.4716	3.27511	30.0218	10.3712	44.7598	6.00437	0.545852	7.64192	0.545852	32.7511	18.0131	15.2838	0	6.00437	17.4672	7.09607	6.55022	63.3188	14.738	21.2882	15.2838	25.1092	2.18341	86.7904	6.00437	4.36681	3.82096	3.82096	4.36681	0.545852	13.6463	20.7424	57.8603	54.5852	14.738	51.31	80.2402	66.048	143.013	16.3755	15.2838	41.4847	87.3362
200183	0	1.94175	5.82524	5.82524	19.4175	7.76699	0	0	19.4175	3.8835	34.9515	1.94175	1.94175	7.76699	0	27.1845	7.76699	42.7184	1.94175	7.76699	11.6505	11.6505	21.3592	17.4757	0	13.5922	11.6505	3.8835	1.94175	15.534	0	11.6505	9.70874	17.4757	7.76699	5.82524	17.4757	0	1.94175	0	8328.16	9.70874	31.068	42.7184	9.70874	5.82524	7.76699	3.8835	11.6505
200184	0	0	11.9522	19.9203	3.98406	3.98406	0	0	35.8566	0	0	3.98406	23.9044	3.98406	0	11.9522	0	19.9203	7.96813	0	0	23.9044	0	3.98406	0	7.96813	3.98406	15.9363	0	7.96813	0	27.8884	7.96813	3.98406	0	19.9203	0	0	0	0	792.829	3.98406	59.761	39.8406	3.98406	0	7.96813	0	717.131
200185	9.375	9.375	3.125	3.125	3.125	6.25	12.5	0	21.875	0	12.5	0	6.25	40.625	3.125	3.125	9.375	12.5	0	3.125	31.25	37.5	3.125	9.375	0	6.25	9.375	9.375	0	18.75	0	9.375	6.25	3.125	12.5	0	21.875	12.5	9.375	21.875	121.875	31.25	37.5	209.375	87.5	59.375	18.75	21.875	2487.5
200186	0	2.6455	2.6455	2.6455	2.6455	13.2275	0	0	15.873	2.6455	2.6455	5.29101	10.582	26.455	2.6455	5.29101	5.29101	55.5556	5.29101	5.29101	23.8095	26.455	18.5185	13.2275	0	5.29101	18.5185	5.29101	2.6455	10.582	0	15.873	26.455	31.746	13.2275	7.93651	29.1005	2.6455	13.2275	0	13650.8	7.93651	42.328	15.873	5.29101	5.29101	21.164	5.29101	37.037
200187	4.42478	15.4867	0	0	8.84956	2.21239	4.42478	11.0619	46.4602	2.21239	8.84956	0	26.5487	22.1239	2.21239	8.84956	4.42478	6.63717	8.84956	6.63717	4.42478	4.42478	4.42478	22.1239	6.63717	6.63717	33.1858	24.3363	0	8.84956	0	0	2.21239	19.9115	2.21239	132.743	17.6991	2.21239	24.3363	0	141.593	0	8.84956	26.5487	4.42478	46.4602	0	37.6106	22.1239
200188	10.3093	10.3093	0	10.3093	0	5.15464	0	0	5.15464	0	30.9278	41.2371	0	15.4639	0	15.4639	0	10.3093	0	0	0	5.15464	20.6186	108.247	5.15464	20.6186	10.3093	5.15464	5.15464	0	5.15464	0	0	0	5.15464	5.15464	5.15464	5.15464	0	0	16144.3	15.4639	15.4639	30.9278	20.6186	5.15464	15.4639	72.1649	25.7732
200189	0	0	0	0	31.348	18.8088	12.5392	0	15.674	0	6.26959	0	0	0	9.40439	6.26959	9.40439	0	59.5611	9.40439	0	65.8307	28.2132	0	0	43.8871	12.5392	12.5392	9.40439	21.9436	0	0	0	0	0	21.9436	3.1348	43.8871	0	0	0	37.6176	9.40439	15.674	18.8088	12.5392	21.9436	21.9436	9.40439
200190	19.6078	0	19.6078	3.26797	45.7516	9.80392	3.26797	3.26797	9.80392	16.3399	117.647	19.6078	26.1438	9.80392	0	19.6078	0	9.80392	0	0	6.53595	9.80392	9.80392	39.2157	3.26797	6.53595	0	3.26797	6.53595	3.26797	0	6.53595	19.6078	0	0	19.6078	9.80392	0	3.26797	0	3643.79	16.3399	32.6797	52.2876	19.6078	3.26797	9.80392	13.0719	19.6078
200191	13.289	3.32226	6.64452	6.64452	33.2226	3.32226	0	0	3.32226	0	19.9336	26.5781	16.6113	19.9336	0	26.5781	0	13.289	0	6.64452	0	16.6113	9.96678	29.9003	0	13.289	9.96678	6.64452	3.32226	3.32226	3.32226	6.64452	9.96678	16.6113	3.32226	3.32226	0	0	3.32226	0	14983.4	19.9336	3.32226	9.96678	16.6113	13.289	6.64452	16.6113	16.6113
200192	0	4.16667	4.16667	0	75	16.6667	0	0	20.8333	0	8.33333	0	0	4.16667	0	4.16667	16.6667	4.16667	54.1667	4.16667	4.16667	8.33333	16.6667	4.16667	0	16.6667	0	4.16667	12.5	12.5	0	4.16667	0	0	4.16667	79.1667	0	0	4.16667	0	12.5	20.8333	50	0	8.33333	0	20.8333	0	125
200193	5.12821	5.12821	46.1538	0	0	5.12821	0	41.0256	0	5.12821	5.12821	0	5.12821	0	5.12821	0	0	241.026	0	5.12821	0	15.3846	0	10.2564	0	5.12821	5.12821	0	0	15.3846	15.3846	92.3077	10.2564	0	0	20.5128	56.4103	5.12821	15.3846	0	234564	0	25.641	51.2821	46.1538	51.2821	82.0513	35.8974	71.7949
200194	21.8978	7.29927	3.64964	0	0	14.5985	3.64964	36.4964	10.9489	3.64964	3.64964	0	10.9489	7.29927	0	7.29927	0	18.2482	18.2482	25.5474	7.29927	3.64964	7.29927	18.2482	0	10.9489	18.2482	7.29927	0	3.64964	0	3.64964	7.29927	0	0	3.64964	14.5985	0	273.723	0	47.4453	32.8467	10.9489	94.8905	0	18.2482	18.2482	10.9489	3.64964
200195	0	0	17.4564	0	19.9501	2.49377	7.4813	0	7.4813	9.97506	7.4813	0	9.97506	37.4065	0	22.4439	0	12.4688	7.4813	7.4813	7.4813	32.419	12.4688	12.4688	0	17.4564	17.4564	19.9501	0	12.4688	0	12.4688	29.9252	14.9626	4.98753	14.9626	9.97506	0	2.49377	14.9626	7.4813	0	12.4688	54.8628	0	2.49377	2.49377	0	775.561
200196	0	0	0	0	55.2486	0	0	0	0	5.52486	11.0497	0	0	0	11.0497	0	5.52486	5.52486	22.0994	0	5.52486	27.6243	5.52486	11.0497	11.0497	0	11.0497	5.52486	0	0	0	0	0	0	0	0	5.52486	33.1492	0	16.5746	0	906.077	0	49.7238	0	0	0	0	248.619
200197	11.5607	5.78035	8.67052	0	11.5607	5.78035	2.89017	2.89017	2.89017	2.89017	34.6821	2.89017	5.78035	20.2312	5.78035	2.89017	8.67052	121.387	2.89017	8.67052	26.0116	5.78035	28.9017	8.67052	0	0	11.5607	0	0	5.78035	0	0	11.5607	17.341	0	2.89017	14.4509	5.78035	8.67052	11.5607	78.0347	31.7919	40.4624	173.41	5.78035	5.78035	11.5607	0	4656.07
200198	6.36943	6.36943	0	0	19.1083	0	0	6.36943	19.1083	0	82.8025	19.1083	0	6.36943	0	38.2166	0	6.36943	0	0	12.7389	6.36943	6.36943	19.1083	0	31.8471	12.7389	0	19.1083	12.7389	12.7389	0	19.1083	19.1083	0	6.36943	0	6.36943	0	0	32286.6	57.3248	19.1083	31.8471	6.36943	12.7389	38.2166	114.65	95.5414
200199	0	0	0	0	23.3645	14.0187	4.6729	4.6729	14.0187	0	28.0374	0	4.6729	14.0187	0	14.0187	14.0187	4.6729	18.6916	0	4.6729	0	32.7103	23.3645	0	0	9.34579	4.6729	0	4.6729	0	0	0	0	4.6729	0	4.6729	0	0	18.6916	0	98.1308	14.0187	23.3645	0	0	0	0	4032.71
200200	20.5128	0	0	0	10.2564	5.12821	0	10.2564	30.7692	0	51.2821	10.2564	15.3846	15.3846	0	5.12821	0	0	0	0	30.7692	10.2564	20.5128	76.9231	0	10.2564	5.12821	15.3846	5.12821	20.5128	5.12821	0	10.2564	5.12821	20.5128	5.12821	0	0	5.12821	0	16897.4	5.12821	0	10.2564	30.7692	5.12821	5.12821	30.7692	61.5385
200201	0	3.90625	0	3.90625	3.90625	0	15.625	0	15.625	0	11.7188	0	0	11.7188	7.8125	11.7188	0	0	0	0	7.8125	3.90625	11.7188	27.3438	3.90625	7.8125	19.5312	11.7188	0	7.8125	3.90625	0	0	0	0	3.90625	0	3.90625	0	7.8125	0	7.8125	128.906	39.0625	0	0	0	0	2054.69
200202	12.1951	0	3.04878	0	9.14634	3.04878	0	6.09756	3.04878	0	24.3902	15.2439	9.14634	36.5854	0	33.5366	0	45.7317	3.04878	27.439	9.14634	15.2439	6.09756	0	0	3.04878	9.14634	3.04878	3.04878	9.14634	3.04878	33.5366	57.9268	15.2439	9.14634	6.09756	12.1951	12.1951	24.3902	0	20948.2	73.1707	48.7805	24.3902	0	27.439	42.6829	21.3415	33.5366
200203	5.64972	5.64972	2.82486	0	19.774	0	0	2.82486	2.82486	0	14.1243	8.47458	25.4237	36.7232	0	42.3729	2.82486	5.64972	2.82486	14.1243	5.64972	5.64972	5.64972	33.8983	2.82486	5.64972	2.82486	2.82486	2.82486	5.64972	5.64972	11.2994	16.9492	19.774	5.64972	5.64972	0	0	0	0	10966.1	22.5989	22.5989	5.64972	19.774	14.1243	5.64972	16.9492	33.8983
200204	10.1597	4.35414	2.90276	0	21.7707	4.35414	11.611	4.35414	13.0624	0	5.80552	1.45138	2.90276	7.25689	50.7983	13.0624	4.35414	8.70827	26.1248	13.0624	2.90276	24.6734	56.6038	40.6386	2.90276	30.479	7.25689	39.1872	4.35414	11.611	0	1.45138	2.90276	10.1597	1.45138	11.611	5.80552	14.5138	30.479	0	110.305	20.3193	5.80552	15.9652	14.5138	15.9652	11.611	8.70827	46.4441
200205	0	7.35294	11.0294	3.67647	40.4412	0	0	0	7.35294	3.67647	95.5882	14.7059	11.0294	11.0294	0	25.7353	0	0	11.0294	18.3824	7.35294	7.35294	3.67647	3.67647	0	7.35294	3.67647	0	0	3.67647	3.67647	7.35294	14.7059	3.67647	3.67647	11.0294	3.67647	0	3.67647	0	5102.94	14.7059	18.3824	47.7941	3.67647	3.67647	25.7353	3.67647	33.0882
200206	0	0	0	0	255.682	0	0	0	0	0	11.3636	0	0	17.0455	11.3636	0	11.3636	5.68182	215.909	5.68182	0	5.68182	5.68182	11.3636	0	11.3636	0	11.3636	85.2273	11.3636	0	0	0	5.68182	11.3636	11.3636	0	0	28.4091	0	1534.09	0	39.7727	39.7727	113.636	0	11.3636	11.3636	0
200207	0	0	3.34448	0	0	26.7559	0	0	3.34448	0	13.3779	0	10.0334	16.7224	26.7559	6.68896	10.0334	180.602	23.4114	3.34448	6.68896	13.3779	16.7224	33.4448	0	6.68896	6.68896	6.68896	0	26.7559	0	26.7559	53.5117	0	0	10.0334	6.68896	10.0334	3.34448	3.34448	141535	90.301	157.191	50.1672	26.7559	66.8896	16.7224	193.98	6.68896
200208	73.3945	0	0	0	0	0	0	27.5229	0	0	0	0	0	9.17431	0	18.3486	0	27.5229	0	0	0	0	27.5229	311.927	0	91.7431	0	55.0459	18.3486	0	0	0	0	9.17431	0	9.17431	9.17431	0	0	0	0	36.6972	0	0	9.17431	0	0	0	45.8716
200209	0	0	0	0	10.3093	0	0	0	0	0	10.3093	0	0	0	649.485	0	0	0	20.6186	0	0	0	216.495	0	0	10.3093	20.6186	30.9278	0	0	0	0	0	0	0	30.9278	0	10.3093	0	0	30.9278	10.3093	0	30.9278	0	20.6186	0	0	113.402
200210	0	172.589	0	0	0	25.3807	0	0	5.07614	0	10.1523	0	0	15.2284	5.07614	5.07614	10.1523	101.523	10.1523	10.1523	0	0	10.1523	5.07614	5.07614	20.3046	30.4569	10.1523	15.2284	0	0	5.07614	20.3046	10.1523	5.07614	25.3807	0	0	5.07614	5.07614	7862.94	5.07614	35.533	40.6091	0	5.07614	0	0	182.741
200211	0	15.9574	0	26.5957	10.6383	0	0	0	0	21.2766	0	0	0	127.66	0	0	0	0	0	15.9574	5.31915	53.1915	15.9574	5.31915	0	10.6383	10.6383	0	0	26.5957	0	0	0	0	0	10.6383	37.234	0	0	15.9574	0	180.851	5.31915	122.34	5.31915	5.31915	26.5957	26.5957	16372.3
200212	14.0845	0	0	0	0	0	14.0845	0	14.0845	0	0	0	0	0	0	0	0	0	0	0	0	0	0	14.0845	0	0	0	14.0845	0	0	0	0	0	0	0	0	56.338	0	0	14.0845	0	28.169	323.944	42.2535	14.0845	0	0	0	17760.6
200213	8	0	0	0	16	0	0	0	16	8	16	0	32	0	0	8	0	16	0	0	16	0	0	0	0	0	40	8	0	88	0	0	24	0	0	0	0	0	0	0	238112	0	56	8	40	88	64	0	16
200214	0	0	0	0	6.28931	6.28931	18.8679	0	31.4465	6.28931	6.28931	6.28931	0	6.28931	0	6.28931	0	6.28931	6.28931	0	0	0	25.1572	50.3145	0	6.28931	12.5786	37.7358	0	0	0	0	6.28931	0	0	0	25.1572	0	6.28931	25.1572	18.8679	37.7358	201.258	44.0252	0	6.28931	0	0	3440.25
200215	0	0	0	0	28.8809	3.61011	28.8809	0	14.4404	0	10.8303	0	0	39.7112	18.0505	3.61011	3.61011	7.22022	43.3213	10.8303	10.8303	0	155.235	3.61011	3.61011	10.8303	0	57.7617	0	28.8809	0	0	0	0	10.8303	25.2708	3.61011	3.61011	7.22022	0	46.9314	3.61011	3.61011	21.6606	10.8303	14.4404	3.61011	7.22022	39.7112
200216	0	20	11.4286	0	0	0	5.71429	2.85714	11.4286	2.85714	80	8.57143	8.57143	5.71429	2.85714	2.85714	0	111.429	14.2857	2.85714	8.57143	0	2.85714	28.5714	2.85714	2.85714	14.2857	14.2857	0	11.4286	0	8.57143	17.1429	11.4286	8.57143	2.85714	5.71429	0	5.71429	0	41537.1	20	11.4286	8.57143	0	20	20	2.85714	11.4286
200217	0	0	6.75676	0	6.75676	6.75676	554.054	0	6.75676	0	6.75676	0	0	0	0	0	0	0	20.2703	0	0	6.75676	0	27.027	0	0	0	0	0	0	0	6.75676	0	0	0	94.5946	13.5135	13.5135	0	1060.81	6.75676	40.5405	20.2703	5425.68	175.676	20.2703	20.2703	13.5135	6486.49
200218	0	0	0	0	23.2558	0	0	0	0	0	0	0	0	0	616.279	0	0	0	0	11.6279	0	0	174.419	0	0	11.6279	23.2558	34.8837	0	0	0	0	0	0	0	0	0	0	0	0	23.2558	0	0	0	11.6279	11.6279	0	11.6279	34.8837
200219	52.6316	21.0526	0	0	0	0	21.0526	31.5789	0	0	0	0	0	21.0526	10.5263	31.5789	10.5263	10.5263	0	0	21.0526	63.1579	84.2105	484.211	0	0	0	10.5263	0	21.0526	0	10.5263	0	0	42.1053	42.1053	0	0	0	0	10.5263	31.5789	21.0526	0	21.0526	0	0	10.5263	84.2105
200220	7.93651	0	3.96825	3.96825	3.96825	3.96825	0	0	0	0	27.7778	7.93651	11.9048	7.93651	0	19.8413	0	15.873	3.96825	7.93651	7.93651	0	0	11.9048	7.93651	3.96825	3.96825	11.9048	0	7.93651	0	23.8095	23.8095	7.93651	19.8413	0	3.96825	0	3.96825	0	16809.5	43.6508	15.873	15.873	23.8095	3.96825	23.8095	19.8413	39.6825
200221	0	0	0	0	14.1844	14.1844	14.1844	0	14.1844	0	0	0	0	7.0922	0	0	0	0	7.0922	7.0922	0	0	14.1844	7.0922	0	7.0922	0	0	0	0	7.0922	99.2908	0	0	7.0922	7.0922	0	7.0922	21.2766	0	0	28.3688	56.7376	35.461	0	0	21.2766	0	10347.5
200222	3.98406	15.9363	0	11.9522	7.96813	7.96813	7.96813	27.8884	11.9522	0	7.96813	0	3.98406	7.96813	0	0	15.9363	11.9522	7.96813	15.9363	0	3.98406	3.98406	39.8406	3.98406	0	7.96813	3.98406	0	3.98406	23.9044	7.96813	19.9203	0	3.98406	19.9203	7.96813	3.98406	0	27.8884	22039.8	63.745	107.57	131.474	11.9522	35.8566	15.9363	11.9522	4513.94
200223	20.3046	0	0	15.2284	0	15.2284	10.1523	0	20.3046	0	0	15.2284	0	10.1523	30.4569	0	5.07614	0	0	10.1523	0	0	5.07614	50.7614	0	0	20.3046	25.3807	5.07614	15.2284	0	30.4569	0	0	0	0	25.3807	10.1523	10.1523	10.1523	50.7614	172.589	20.3046	71.066	55.8376	30.4569	5.07614	15.2284	9263.96
200224	0	0	0	5.61798	5.61798	0	0	5.61798	39.3258	0	0	0	0	5.61798	5.61798	0	5.61798	0	16.8539	0	0	0	39.3258	28.0899	5.61798	0	0	16.8539	16.8539	5.61798	0	0	0	5.61798	0	5.61798	0	0	0	0	16.8539	174.157	16.8539	5.61798	5.61798	0	0	0	0
200225	0	19.1083	0	0	6.36943	12.7389	31.8471	0	6.36943	0	6.36943	0	0	12.7389	0	0	0	0	6.36943	0	0	0	0	19.1083	0	6.36943	6.36943	6.36943	0	0	0	0	0	0	6.36943	31.8471	6.36943	0	0	12.7389	18808.9	19.1083	70.0637	95.5414	0	6.36943	0	6.36943	4904.46
200227	0	9.47867	9.47867	0	0	0	23.6967	0	9.47867	0	18.9573	0	0	4.73934	4.73934	0	4.73934	0	9.47867	0	0	4.73934	18.9573	0	0	14.218	4.73934	0	0	0	0	4.73934	9.47867	4.73934	4.73934	9.47867	4.73934	0	0	4.73934	4.73934	18.9573	9.47867	52.1327	0	0	0	0	1028.44
200228	0	6.17284	0	0	67.9012	0	0	0	6.17284	0	0	0	37.037	67.9012	6.17284	55.5556	0	12.3457	0	0	0	12.3457	0	80.2469	0	6.17284	0	0	6.17284	6.17284	0	12.3457	0	6.17284	0	6.17284	6.17284	0	0	0	7462.96	24.6914	24.6914	12.3457	24.6914	37.037	12.3457	0	37.037
200229	48.3871	16.129	4.03226	12.0968	0	0	8.06452	0	12.0968	20.1613	8.06452	4.03226	4.03226	8.06452	0	4.03226	4.03226	0	0	4.03226	20.1613	4.03226	4.03226	24.1935	0	8.06452	8.06452	8.06452	4.03226	24.1935	0	0	24.1935	0	0	4.03226	0	4.03226	4.03226	4.03226	16.129	20.1613	4.03226	68.5484	12.0968	0	0	0	181.452
200230	34.2857	0	0	5.71429	0	0	22.8571	0	28.5714	0	0	0	0	22.8571	0	5.71429	0	0	0	17.1429	28.5714	0	5.71429	0	0	5.71429	0	17.1429	51.4286	0	0	0	0	5.71429	17.1429	11.4286	5.71429	11.4286	0	0	51.4286	45.7143	11.4286	85.7143	0	11.4286	0	17.1429	3662.86
200231	0	4.87805	0	4.87805	0	4.87805	0	34.1463	0	0	48.7805	9.7561	4.87805	68.2927	0	0	4.87805	0	14.6341	0	0	0	4.87805	4.87805	0	4.87805	0	4.87805	4.87805	9.7561	0	0	9.7561	9.7561	0	4.87805	24.3902	9.7561	4.87805	9.7561	29.2683	29.2683	19.5122	97.561	14.6341	19.5122	4.87805	4.87805	6009.76
200232	11.3636	0	0	0	11.3636	0	11.3636	0	0	0	0	11.3636	0	0	0	0	0	0	11.3636	11.3636	0	0	11.3636	0	0	0	0	0	11.3636	11.3636	0	22.7273	11.3636	11.3636	0	0	22.7273	0	0	11.3636	556.818	34.0909	306.818	79.5455	0	0	22.7273	11.3636	6840.91
200233	0	0	3.78788	3.78788	0	34.0909	0	0	11.3636	0	3.78788	0	18.9394	0	15.1515	3.78788	3.78788	121.212	11.3636	0	0	0	0	18.9394	0	3.78788	7.57576	0	0	11.3636	0	18.9394	49.2424	0	0	11.3636	3.78788	0	0	3.78788	122996	49.2424	140.152	45.4545	11.3636	83.3333	7.57576	200.758	56.8182
200234	0	8.26446	16.5289	0	57.8512	16.5289	0	0	24.7934	0	0	8.26446	0	16.5289	0	0	0	8.26446	24.7934	0	0	0	0	16.5289	0	0	0	0	8.26446	0	0	0	0	0	0	0	0	0	0	8.26446	801.653	264.463	16.5289	49.5868	99.1736	0	0	0	2082.64
200235	0	3.18471	12.7389	3.18471	0	6.36943	12.7389	31.8471	9.55414	9.55414	70.0637	3.18471	9.55414	9.55414	0	22.293	0	19.1083	3.18471	3.18471	6.36943	6.36943	0	25.4777	0	12.7389	0	0	6.36943	6.36943	3.18471	3.18471	6.36943	0	0	12.7389	3.18471	3.18471	0	22.293	1840.76	9.55414	6.36943	127.389	0	47.7707	98.7261	15.9236	1496.82
200236	0	0	5.05051	0	30.303	5.05051	10.101	0	0	0	10.101	0	0	0	0	5.05051	0	5.05051	0	10.101	5.05051	0	0	5.05051	0	0	5.05051	0	0	5.05051	0	0	0	0	0	10.101	15.1515	0	0	35.3535	5.05051	90.9091	30.303	232.323	0	5.05051	5.05051	0	1686.87
200237	0	0	0	0	5.05051	0	0	0	10.101	0	5.05051	15.1515	0	10.101	15.1515	20.202	5.05051	0	40.404	0	10.101	0	0	5.05051	5.05051	0	0	15.1515	0	0	0	5.05051	0	0	5.05051	5.05051	15.1515	5.05051	20.202	20.202	25.2525	10.101	15.1515	252.525	5.05051	20.202	30.303	25.2525	202.02
200238	127.517	13.4228	0	0	0	13.4228	0	0	53.6913	0	6.71141	0	6.71141	0	6.71141	6.71141	0	0	13.4228	6.71141	0	0	6.71141	6.71141	6.71141	13.4228	0	20.1342	0	6.71141	6.71141	6.71141	0	0	0	13.4228	13.4228	0	13.4228	6.71141	0	6.71141	0	67.1141	20.1342	6.71141	0	0	1543.62
200239	0	7.14286	0	0	0	7.14286	14.2857	7.14286	7.14286	0	0	0	0	28.5714	7.14286	7.14286	7.14286	0	35.7143	14.2857	0	14.2857	0	7.14286	0	0	0	21.4286	14.2857	28.5714	0	0	0	0	0	7.14286	7.14286	0	14.2857	50	71.4286	471.429	21.4286	142.857	28.5714	14.2857	0	0	23450
200240	0	0	0	0	0	52.6316	0	0	0	0	0	13.1579	0	0	13.1579	13.1579	0	0	0	0	0	13.1579	13.1579	0	0	0	0	13.1579	0	13.1579	0	0	0	0	0	13.1579	13.1579	0	0	0	30407.9	0	13.1579	197.368	0	78.9474	13.1579	0	2026.32
200241	0	0	15.7895	0	5.26316	0	10.5263	0	5.26316	0	15.7895	0	0	21.0526	10.5263	0	0	0	31.5789	0	5.26316	5.26316	0	15.7895	5.26316	5.26316	0	10.5263	0	0	0	0	0	5.26316	0	5.26316	26.3158	0	0	0	10.5263	5.26316	21.0526	242.105	31.5789	15.7895	10.5263	21.0526	347.368
200242	0	0	62.5	0	0	10.4167	20.8333	0	0	0	125	0	0	20.8333	0	0	0	10.4167	0	0	0	10.4167	10.4167	20.8333	0	20.8333	0	20.8333	0	10.4167	10.4167	72.9167	0	0	0	20.8333	0	10.4167	0	20.8333	0	10.4167	0	72.9167	10.4167	0	0	0	312.5
[truncated: 168 more columns]
