# Supplementary material for: The Archaeome's Role in Colorectal Cancer: Unveiling the DPANN Group and Investigating Archaeal Functional Signatures
Source: Preprints.org preprint supplement (doi:10.20944/preprints202308.1572.v1), 2023-08-22
Supplement: Supplementary file 4 [file Supplementary data S4 (Biostatistical analysis for the taxonomic analysis).xlsx]

## Sheet: Archaeal  Patterns in CRC
Spearman Correlation
	Correlation	P-Value
Sulfolobus sp. E5-1-F	-0.29235	4.0046e-09
Nanohaloarchaea archaeon	-0.26663	9.0111e-08
Pyrolobus fumarii	-0.26085	1.7363e-07
Methanothermobacter wolfeii	-0.25735	2.5651e-07
Methanobrevibacter olleyae	-0.25233	4.4381e-07
Methanosarcina barkeri	-0.245	9.6984e-07
Haloferax alexandrinus	-0.23446	2.8568e-06
Methanobacterium paludis	-0.21905	1.2702e-05
Thermococcus chitonophagus	-0.2137	2.0821e-05
Methanobacterium sp. MZ-A1	-0.21001	2.905e-05
Thermococcus litoralis	-0.20001	6.9663e-05
Methanosarcina flavescens	-0.19624	9.5841e-05
Halorubrum lacusprofundi	-0.18496	0.00024008
Methanosarcina siciliae	-0.1779	0.00041539
Conexivisphaera calidus	-0.17523	0.00050827
Metallosphaera sedula	-0.16864	0.0008267
Halorhabdus utahensis	-0.15993	0.001531
Thermococcus thioreducens	-0.1583	0.0017133
Methanosarcina mazei	-0.14808	0.0033773
Methanobrevibacter ruminantium	-0.14068	0.0053845
Nitrososphaera viennensis	-0.13983	0.005673
Methanofervidicoccus sp. A16	-0.13749	0.0065406
Thermococcus gorgonarius	-0.13569	0.007288
Methanosarcina sp. MTP4	-0.13277	0.0086582
Methanocorpusculum labreanum	-0.13122	0.0094765
Candidatus Nitrosotenuis sp. DW1	-0.13031	0.009989
Methanolacinia petrolearia	-0.12726	0.011891
Methanococcoides burtonii	-0.12507	0.013444
Candidatus Nitrosopumilus sediminis	-0.1241	0.014193
Haloplanus rallus	-0.11968	0.018063
Archaeoglobus veneficus	-0.11387	0.024526
Natronomonas pharaonis	-0.11234	0.026523
Methanococcus voltae	-0.11159	0.027556
Methanotorris igneus	-0.11084	0.028624
Thermococcus sp. SY113	-0.10464	0.038866
Methanobacterium lacus	-0.10389	0.040298
Methanococcoides methylutens	-0.09945	0.049699
Thermococcus paralvinellae	-0.099339	0.049956
Thermococcus sp. AM4	-0.098042	0.053037
Natrialbaceae archaeon XQ-INN 246	-0.097581	0.05417
Candidatus Nitrosopelagicus brevis	-0.095691	0.059024
Thermococcus radiotolerans	-0.093208	0.065943
Haloprofundus sp. MHR1	-0.092501	0.068031
Nitrosarchaeum sp. AC2	-0.090065	0.075644
Methanolobus zinderi	-0.087264	0.085238
Methanosarcina horonobensis	-0.086624	0.087559
Nitrosopumilus piranensis	-0.084752	0.094652
Methanocaldococcus bathoardescens	-0.080467	0.11261
Candidatus Nitrosotalea okcheonensis	-0.0801	0.11426
Methanospirillum hungatei	-0.077218	0.12793
Halolamina sp. CBA1230	-0.070521	0.16455
Thermococcus sp. IOH1	-0.069225	0.17247
Thermococcus sp. 4557	-0.067247	0.18508
Candidatus Nitrosocosmicus franklandus	-0.063952	0.2076
Methanohalobium evestigatum	-0.063851	0.20832
Vulcanisaeta moutnovskia	-0.06211	0.22102
Sulfolobus acidocaldarius	-0.0563	0.26737
Thermoplasma acidophilum	-0.054875	0.27968
Thermoplasmatales archaeon BRNA1	-0.054439	0.28352
Fervidicoccus fontis	-0.052822	0.29809
Methanomethylovorans hollandica	-0.052116	0.3046
methanogenic archaeon ISO4-H5	-0.051387	0.31143
halophilic archaeon DL31	-0.049656	0.32803
Salarchaeum sp. JOR-1	-0.048722	0.33722
Methanosalsum zhilinae	-0.047996	0.34448
Natrarchaeobaculum sulfurireducens	-0.044349	0.38242
Picrophilus torridus	-0.043703	0.3894
Halorhabdus tiamatea	-0.043005	0.39703
Thermoproteus uzoniensis	-0.039625	0.4352
Pyrobaculum ferrireducens	-0.039151	0.44072
Halorubrum ezzemoulense	-0.036992	0.46635
Haloarcula taiwanensis	-0.034554	0.49625
Natronomonas moolapensis	-0.033529	0.50912
Methanoplanus limicola	-0.032869	0.51751
Halorientalis sp. IM1011	-0.032436	0.52304
Nitrosopumilus ureiphilus	-0.031461	0.53561
Halostella pelagica	-0.031437	0.53593
Methanosarcina lacustris	-0.027177	0.5926
Haloarcula hispanica	-0.027094	0.59372
Pyrococcus sp. NA2	-0.026758	0.59831
Salinarchaeum sp. Harcht-Bsk1	-0.026331	0.60416
Halorubrum sp. PV6	-0.026195	0.60604
Halovivax ruber	-0.025921	0.60981
Methanoregula formicica	-0.024054	0.63581
Methanococcus aeolicus	-0.020652	0.68432
Haloarcula marismortui	-0.017564	0.72951
Pyrococcus sp. ST04	-0.015911	0.7541
Acidilobus sp. 7A	-0.01514	0.76566
Haloquadratum walsbyi	-0.015042	0.76714
Methanosphaera sp. BMS	-0.012851	0.80028
Candidatus Nitrososphaera evergladensis	-0.011184	0.82574
haloarchaeon 3A1-DGR	-0.010478	0.83659
Nitrosopumilus oxyclinae	-0.010427	0.83736
Halobiforma lacisalsi	-0.0090201	0.85907
Methanobrevibacter millerae	-0.0080179	0.87459
Halorussus sp. ZS-3	-0.0065145	0.89796
Halorubrum sp. BOL3-1	-0.0059224	0.90719
Haloferax mediterranei	-0.0052389	0.91786
Halobonum sp. NJ-3-1	-0.0046239	0.92747
Methanosarcina thermophila	-0.0045601	0.92847
Natrinema pallidum	-0.0036227	0.94315
Candidatus Prometheoarchaeum syntrophicum	-0.0012756	0.97997
Methanohalophilus mahii	-0.0009796	0.98462
Natrinema sp. YPL30	0.00034167	0.99463
Haloarculaceae archaeon HArcel1	0.0006378	0.98998
Candidatus Methanomethylophilus alvus	0.0040773	0.93603
Methanosphaera stadtmanae	0.0052395	0.91785
Methanothermococcus okinawensis	0.0076762	0.87989
Thermococcus onnurineus	0.0080329	0.87435
Halosimplex pelagicum	0.0090656	0.85836
Thermofilum pendens	0.0095216	0.85132
Methanocella arvoryzae	0.01148	0.82121
Methanobacterium formicicum	0.011512	0.82072
Candidatus Nitrosocosmicus exaquare	0.011803	0.81627
Halogeometricum borinquense	0.012027	0.81285
Archaeoglobus fulgidus	0.012483	0.80589
Halalkaliarchaeum desulfuricum	0.013439	0.79135
Natronorubrum bangense	0.013804	0.78582
Methanomassiliicoccaceae archaeon DOK	0.014487	0.7755
Methanococcus maripaludis	0.015102	0.76624
Natrinema pellirubrum	0.016743	0.74169
Candidatus Methanomassiliicoccus intestinalis	0.017153	0.73561
Methanocaldococcus sp. FS406-22	0.017563	0.72953
Methanothrix thermoacetophila	0.018011	0.72291
Methanocella paludicola	0.020773	0.68256
Halobellus limi	0.021935	0.66585
Methanothrix soehngenii	0.023689	0.64094
Thermogladius calderae	0.025313	0.61823
Methanocaldococcus infernus	0.025972	0.6091
Methanobrevibacter sp. AbM4	0.02697	0.59541
Halorhabdus sp. CBA1104	0.027175	0.59262
Natrialba magadii	0.029292	0.56411
Thermococcus pacificus	0.031556	0.53438
DPANN group archaeon LC1Nh	0.03205	0.52799
Halodesulfurarchaeum formicicum	0.034714	0.49426
Natronobacterium gregoryi	0.035018	0.49049
Halopiger xanaduensis	0.038472	0.44869
Archaeoglobus sulfaticallidus	0.039132	0.44094
Natronomonas sp. YPL13	0.042276	0.40509
Methanohalophilus portucalensis	0.043225	0.39462
Thermococcus profundus	0.043428	0.39239
Halobacterium sp. DL1	0.043893	0.38734
Thermococcus barossii	0.044122	0.38487
Haloterrigena turkmenica	0.044668	0.37901
Haloterrigena sp. YPL8	0.044967	0.37582
Haloarcula sp. JP-L23	0.04526	0.37272
Natronococcus occultus	0.045444	0.37077
Acidianus manzaensis	0.045714	0.36793
Methanocaldococcus vulcanius	0.051549	0.30991
Aciduliprofundum boonei	0.052837	0.29796
Haloplanus aerogenes	0.052982	0.29664
Thermococcus nautili	0.053788	0.28934
Methanobrevibacter sp. YE315	0.054102	0.28652
Methanosarcina acetivorans	0.055465	0.27454
Thermococcus siculi	0.056472	0.2659
Thermococcus piezophilus	0.058919	0.24571
Halorubrum sp. CBA1229	0.059701	0.23949
Halorussus sp. RC-68	0.060179	0.23574
Haloferax volcanii	0.070384	0.16537
Haloterrigena daqingensis	0.071639	0.15794
Thermococcus guaymasensis	0.072804	0.15127
Natronorubrum aibiense	0.073164	0.14926
Methanobacterium sp. MB1	0.074376	0.14261
Natrarchaeobaculum aegyptiacum	0.074852	0.14007
Thermococcus sp. EXT12c	0.075744	0.13539
Halalkalicoccus jeotgali	0.075987	0.13414
Methanoregula boonei	0.077333	0.12736
Geoglobus ahangari	0.0812	0.10936
Methanosarcina vacuolata	0.082495	0.1038
Halobacterium hubeiense	0.089244	0.07836
Pyrobaculum arsenaticum	0.0918	0.070153
Halobonum sp. Gai3-2	0.093162	0.066079
Methanoculleus marisnigri	0.094984	0.06093
Aciduliprofundum sp. MAR08-339	0.095659	0.059108
Methanococcus vannielii	0.098288	0.052441
Pyrobaculum neutrophilum	0.098891	0.051002
Candidatus Korarchaeum cryptofilum	0.09897	0.050817
Salinigranum rubrum	0.099268	0.05012
Halanaeroarchaeum sulfurireducens	0.10362	0.040833
Thermococcus celer	0.10545	0.037373
Thermococcus barophilus	0.10827	0.032556
Thermococcus sp. P6	0.10829	0.032518
Halarchaeum sp. CBA1220	0.1107	0.028823
Candidatus Nitrososphaera gargensis	0.1173	0.020501
Thermococcus kodakarensis	0.11853	0.019209
Methanofollis liminatans	0.12091	0.016904
Methanopyrus kandleri	0.12117	0.016661
Methanohalophilus halophilus	0.12552	0.013113
Natrinema versiforme	0.13057	0.0098445
Candidatus Nitrosomarinus catalina	0.13369	0.0082024
Thermoplasma volcanium	0.13469	0.0077337
Halobacterium salinarum	0.15164	0.002679
Halomicrobium mukohataei	0.15271	0.0024958
Thermococcus gammatolerans	0.15474	0.0021801
Natronomonas sp. C90	0.15589	0.0020175
Candidatus Mancarchaeum acidiphilum	0.15837	0.0017045
Thermococcus cleftensis	0.16633	0.00097673
Candidatus Nitrosotenuis cloacae	0.16672	0.00094975
Cuniculiplasma divulgatum	0.16901	0.00080476
Methanobrevibacter smithii	0.17813	0.00040822
Methanosaeta harundinacea	0.1807	0.00033501
Thermococcus peptonophilus	0.18558	0.00022847
Thermococcus eurythermalis	0.18755	0.00019535
Halostagnicola larsenii	0.18777	0.00019193
Halapricum salinum	0.19427	0.00011294
Haloferax gibbonsii	0.19457	0.00011013
Methanosphaerula palustris	0.19528	0.00010384
Halomicrobium sp. LC1Hm	0.20168	6.0385e-05
Natrinema sp. J7-2	0.20897	3.1894e-05
Halosimplex rubrum	0.20983	2.9524e-05
Methanocella conradii	0.21133	2.5793e-05
Halorubrum trapanicum	0.21184	2.4653e-05
Salinibaculum litoreum	0.21394	2.036e-05
Halopenitus persicus	0.22339	8.4326e-06
Halorubrum sp. RHB-C	0.25566	3.0895e-07
Ferroglobus placidus	0.27226	4.6823e-08
Methanoculleus bourgensis	0.30017	1.4588e-09

## Sheet: Inter-Archaeal Correlation
Spearman Correlation
	Correlation	P-Value
Methanocella conradii	,206**	4.19649e-05
Methanoculleus bourgensis	,197**	9.1351e-05
Natrinema sp. J7-2	,196**	9.98937e-05
Ferroglobus placidus	,195**	0.00011071
Methanohalophilus halophilus	,190**	0.000161429
Halosimplex rubrum	,174**	0.00054889
Halopenitus persicus	,174**	0.000570482
Salinibaculum litoreum	,167**	0.000906328
Halarchaeum sp. CBA1220	,154**	0.00221919
Methanosaeta harundinacea	,142**	0.00489925
Halapricum salinum	,141**	0.00540859
Candidatus Nitrosomarinus catalina	,134**	0.00801678
Halostagnicola larsenii	,133**	0.00849928
Methanofollis liminatans	,107*	0.0344708
Thermococcus cleftensis	,106*	0.0371876
Thermococcus peptonophilus	,103*	0.0420233
Sulfolobus sp. E5-1-F	-,254**	3.58975e-07
Pyrolobus fumarii	-,229**	5.13506e-06
Thermococcus chitonophagus	-,209**	3.11445e-05
Methanobacterium sp. MZ-A1	-,207**	3.81149e-05
Metallosphaera sedula	-,174**	0.000548348
Methanofervidicoccus sp. A16	-,171**	0.000702605
Methanobacterium paludis	-,164**	0.00117
Nanohaloarchaea archaeon	-,147**	0.00363888
Thermococcus gorgonarius	-,138**	0.00643241
Methanosarcina flavescens	-,132**	0.00908075
Haloferax alexandrinus	-,124*	0.0144891
Methanococcus voltae	-,116*	0.0221297
Methanobrevibacter olleyae	-,108*	0.0324445
Thermococcus thioreducens	-,104*	0.0397661
Methanosarcina barkeri	-,103*	0.042089
Geoglobus ahangari	,223**	8.94832e-06
Halorussus sp. ZS-3	-,193**	0.000123248
Sulfolobus acidocaldarius	,158**	0.00178251
Pyrobaculum arsenaticum	,148**	0.00336108
Halorubrum sp. PV6	-,146**	0.00378658
halophilic archaeon DL31	-,145**	0.00399086
Methanocaldococcus sp. FS406-22	,137**	0.00663394
Halorubrum sp. BOL3-1	,136**	0.00723115
Pyrococcus sp. NA2	,130*	0.010087
Pyrobaculum ferrireducens	,130*	0.0101569
Methanococcus vannielii	,129*	0.0108965
haloarchaeon 3A1-DGR	,122*	0.0162347
Thermofilum pendens	,118*	0.019462
Halorussus sp. RC-68	,115*	0.0225781
Halosimplex pelagicum	-,114*	0.0248975
Natronococcus occultus	,109*	0.0317849
Methanocaldococcus vulcanius	,104*	0.0403461
Methanohalophilus portucalensis	,103*	0.0411119
Natrinema pellirubrum	-,103*	0.0415133
Candidatus Nitrosocosmicus franklandus	-,102*	0.0449896
Halobacterium sp. DL1	-,100*	0.0483828
Status	,156**	0.00195367
Methanohalophilus mahii	-0.099128	0.0504465
Methanosarcina lacustris	-0.097912	0.053354
Thermococcus eurythermalis	0.0974363	0.0545286
Candidatus Nitrososphaera gargensis	0.0968134	0.0560993
Halorhabdus tiamatea	-0.0948626	0.0612625
Methanoregula formicica	0.0939152	0.0639082
Thermococcus nautili	0.093824	0.0641677
methanogenic archaeon ISO4-H5	0.0935125	0.0650609
Haloplanus rallus	-0.0934583	0.0652171
Candidatus Nitrosotenuis cloacae	0.0933291	0.0655913
Nitrososphaera viennensis	-0.0917053	0.0704454
Methanocaldococcus bathoardescens	0.0910395	0.072519
Thermococcus radiotolerans	-0.0908434	0.073139
Natronobacterium gregoryi	0.0899321	0.0760779
Methanomassiliicoccaceae archaeon DOK	-0.0897458	0.0766902
Methanothermobacter wolfeii	-0.0896915	0.0768694
Methanosarcina acetivorans	0.0895522	0.0773306
Salarchaeum sp. JOR-1	-0.0889284	0.0794244
Methanosarcina sp. MTP4	-0.0889085	0.0794923
Methanosalsum zhilinae	-0.08809	0.0823107
Thermococcus onnurineus	-0.0866681	0.0873987
Halolamina sp. CBA1230	-0.086514	0.0879652
Methanobacterium formicicum	-0.0852696	0.0926467
Natrinema versiforme	0.085139	0.0931494
Methanosarcina mazei	-0.0850861	0.0933536
Aciduliprofundum sp. MAR08-339	0.0850078	0.0936567
Halorubrum sp. CBA1229	-0.0844804	0.0957175
Haloferax gibbonsii	0.0838055	0.0984079
Pyrobaculum neutrophilum	0.0806523	0.111782
Halalkaliarchaeum desulfuricum	-0.0789508	0.11957
Methanothrix soehngenii	-0.0789104	0.119761
Nitrosopumilus piranensis	-0.0785026	0.121691
Natronomonas sp. C90	0.0784012	0.122175
Methanobrevibacter smithii	0.0775853	0.126122
Haloterrigena sp. YPL8	-0.0760303	0.133918
Methanococcus maripaludis	0.0753692	0.137343
Methanosphaera stadtmanae	0.0752961	0.137726
Halobellus limi	-0.0728977	0.150745
Halorubrum lacusprofundi	-0.0723367	0.153921
Halomicrobium sp. LC1Hm	0.0699248	0.168154
Pyrococcus sp. ST04	0.0695925	0.17019
Halanaeroarchaeum sulfurireducens	0.068912	0.174416
Nitrosopumilus oxyclinae	-0.0688249	0.174963
Thermococcus piezophilus	0.0678221	0.181347
Thermococcus guaymasensis	0.0661018	0.192698
Thermococcus barophilus	0.0647583	0.201917
Halogeometricum borinquense	-0.0643166	0.205017
Candidatus Prometheoarchaeum syntrophicum	0.0641262	0.206364
Methanolobus zinderi	-0.0635503	0.210477
Natronomonas pharaonis	-0.0632418	0.212704
Natronorubrum bangense	0.0626681	0.216891
Candidatus Nitrososphaera evergladensis	0.0626042	0.217361
Thermoplasmatales archaeon BRNA1	-0.061771	0.223556
Haloterrigena turkmenica	-0.0617677	0.223581
Candidatus Korarchaeum cryptofilum	0.060359	0.23434
Candidatus Nitrosotenuis sp. DW1	-0.0582319	0.25127
Methanocaldococcus infernus	0.0556539	0.272905
Methanococcoides burtonii	-0.0537064	0.290067
Salinigranum rubrum	0.0528179	0.298132
Natrarchaeobaculum sulfurireducens	-0.0525383	0.3007
Natrinema pallidum	-0.052432	0.301681
Methanosarcina vacuolata	0.0515666	0.309741
Methanosphaera sp. BMS	0.0512753	0.312486
Thermococcus celer	0.0510678	0.31445
Nitrosopumilus maritimus	0.0497741	0.326883
Aciduliprofundum boonei	-0.0490401	0.334076
Conexivisphaera calidus	-0.0489376	0.335088
Methanoregula boonei	0.0487131	0.337313
Candidatus Nitrosotalea okcheonensis	-0.0480817	0.34362
Methanopyrus kandleri	0.0447061	0.378598
Thermococcus kodakarensis	-0.0446033	0.379697
Haloarcula taiwanensis	0.0445309	0.380472
Methanothermococcus okinawensis	0.044275	0.383218
Thermoplasma volcanium	0.0433607	0.393128
Methanospirillum hungatei	-0.0404037	0.426222
Methanobacterium lacus	-0.0402891	0.427536
Halobonum sp. Gai3-2	-0.0401926	0.428645
Nitrosopumilus ureiphilus	0.0395681	0.435859
Halorubrum sp. RHB-C	0.0388922	0.443745
Thermococcus sp. IOH1	0.0379226	0.455199
Haloplanus aerogenes	-0.0373354	0.462215
Natronomonas sp. YPL13	0.0366711	0.470224
Candidatus Nitrosopumilus sediminis	-0.0364729	0.472629
Haloarcula marismortui	0.0360494	0.477789
Natronomonas moolapensis	0.0360432	0.477864
Thermococcus sp. 4557	-0.0358257	0.480527
Halorubrum trapanicum	0.0356995	0.482075
Natrarchaeobaculum aegyptiacum	0.0355856	0.483475
Methanobacterium sp. MB1	0.03555	0.483913
Natrialbaceae archaeon XQ-INN 246	-0.0354117	0.485616
Methanotorris igneus	-0.0354116	0.485616
Archaeoglobus fulgidus	0.035334	0.486574
Candidatus Methanomethylophilus alvus	0.0345299	0.496552
Halorubrum ezzemoulense	0.0330398	0.515326
Halobiforma lacisalsi	-0.0321578	0.526609
Methanocorpusculum labreanum	0.0321089	0.527238
Natrialba magadii	0.031566	0.53425
Halodesulfurarchaeum formicicum	-0.03065	0.546184
Candidatus Methanomassiliicoccus intestinalis	-0.0306428	0.546278
Haloquadratum walsbyi	0.0300134	0.554556
Thermococcus paralvinellae	-0.0299508	0.555382
Fervidicoccus fontis	-0.0299499	0.555393
Methanothrix thermoacetophila	-0.0290409	0.567464
Halostella pelagica	-0.0289012	0.569329
Archaeoglobus veneficus	-0.0285634	0.573853
Thermococcus sp. AM4	0.0282935	0.57748
Halalkalicoccus jeotgali	0.0269435	0.595779
Methanosphaerula palustris	0.0256792	0.613152
Thermoproteus uzoniensis	-0.0256605	0.613411
Haloarcula sp. JP-L23	-0.0254476	0.616358
Thermococcus barossii	-0.0251281	0.620793
Halorhabdus sp. CBA1104	-0.0239096	0.637835
Thermoplasma acidophilum	0.0228519	0.652784
Methanococcus aeolicus	-0.0220506	0.664202
Methanocella arvoryzae	-0.0219921	0.665038
Halobacterium salinarum	0.0216217	0.670346
Cuniculiplasma divulgatum	0.0214589	0.672683
Halomicrobium mukohataei	-0.021233	0.675933
Halovivax ruber	-0.0203766	0.688306
Haloprofundus sp. MHR1	-0.0198654	0.695731
Natronorubrum aibiense	0.0189236	0.709488
Thermococcus siculi	-0.0186332	0.713748
Haloterrigena daqingensis	-0.018273	0.719045
Thermococcus sp. P6	-0.0180816	0.721865
Methanococcoides methylutens	-0.0178056	0.725941
Picrophilus torridus	0.0176958	0.727563
Halorientalis sp. IM1011	0.0171764	0.735256
Thermococcus pacificus	0.0165961	0.743881
Methanobrevibacter ruminantium	-0.015807	0.755663
Thermococcus sp. EXT12c	-0.0147085	0.772158
Methanosarcina thermophila	-0.0142187	0.779547
Natrinema sp. YPL30	-0.0139824	0.783118
Methanomethylovorans hollandica	0.0139628	0.783414
Vulcanisaeta moutnovskia	0.0136133	0.788707
Methanolacinia petrolearia	-0.013593	0.789014
Palaeococcus pacificus	-0.013542	0.789787
Archaeoglobus sulfaticallidus	0.0135031	0.790376
Methanoplanus limicola	-0.0126268	0.803694
Methanobrevibacter millerae	0.0122236	0.809841
Haloarculaceae archaeon HArcel1	0.0121271	0.811314
Methanosarcina horonobensis	-0.0110067	0.828462
Candidatus Nitrosocosmicus exaquare	0.0108299	0.831176
Halobonum sp. NJ-3-1	-0.0103267	0.83891
Acidianus manzaensis	-0.0100587	0.843037
Salinarchaeum sp. Harcht-Bsk1	0.00933777	0.854156
Methanocella paludicola	-0.009228	0.855852
Methanosarcina siciliae	-0.00893521	0.860378
Candidatus Nitrosopelagicus brevis	0.00843736	0.868084
Thermococcus gammatolerans	-0.00814482	0.872618
Methanohalobium evestigatum	-0.00813387	0.872788
Methanobrevibacter sp. YE315	-0.00702734	0.889976
Nitrosarchaeum sp. AC2	0.00690615	0.891861
Thermococcus sp. SY113	-0.00641139	0.899566
Thermococcus litoralis	-0.00631035	0.90114
Halopiger xanaduensis	-0.00614135	0.903775
Halobacterium hubeiense	0.00587134	0.907987
Thermogladius calderae	-0.00506583	0.920565
Halorhabdus utahensis	-0.00404584	0.936521
Methanobrevibacter sp. AbM4	-0.00344261	0.94597
Acidilobus sp. 7A	0.00211289	0.966824
Methanoculleus marisnigri	0.00108334	0.982986
Haloferax mediterranei	-0.000734841	0.988459
DPANN group archaeon LC1Nh	-0.000145585	0.997713
Haloferax volcanii	-0.000142483	0.997762
