# Supplementary material for: The Archaeome's Role in Colorectal Cancer: Unveiling the DPANN Group and Investigating Archaeal Functional Signatures
Source: Preprints.org preprint supplement (doi:10.20944/preprints202308.1572.v1), 2023-08-22
Supplement: Supplementary file 5 [file Supplementary data S5 (Prokka annotation).xlsx]

## Sheet: Prokka annotation
#ID	Project n°	run accession	(4S)-4-hydroxy-5-phosphonooxypentane-2,3-dione isomerase	(5-formylfuran-3-yl)methyl phosphate transaminase	(R)-citramalate synthase	(R)-citramalate synthase CimA	[LysW]-aminoadipate semialdehyde/glutamate semialdehyde transaminase	[LysW]-aminoadipate/[LysW]-glutamate kinase	[LysW]-L-2-aminoadipate/[LysW]-L-glutamate phosphate reductase	[LysW]-lysine/[LysW]-ornithine hydrolase	1-deoxy-D-xylulose 5-phosphate reductoisomerase	1-deoxy-D-xylulose-5-phosphate synthase	1-phosphofructokinase	1-pyrroline-5-carboxylate dehydrogenase	1,4-alpha-glucan branching enzyme GlgB	1,4-dihydroxy-2-naphthoate octaprenyltransferase	1,4-dihydroxy-2-naphthoyl-CoA hydrolase	1,4-dihydroxy-2-naphthoyl-CoA synthase	1,4-dihydroxy-6-naphtoate synthase	10 kDa chaperonin	16S ribosomal RNA	16S ribosomal RNA (partial)	1D-myo-inositol 2-acetamido-2-deoxy-alpha-D-glucopyranoside deacetylase	2-(5''-triphosphoribosyl)-3'-dephosphocoenzyme-A synthase	2-amino-3-ketobutyrate coenzyme A ligase	2-amino-3,7-dideoxy-D-threo-hept-6-ulosonate synthase	2-aminoethylphosphonate--pyruvate transaminase	2-C-methyl-D-erythritol 2,4-cyclodiphosphate synthase	2-C-methyl-D-erythritol 4-phosphate cytidylyltransferase	2-dehydro-3-deoxy-D-arabinonate dehydratase	2-dehydro-3-deoxy-D-gluconate/2-dehydro-3-deoxy-phosphogluconate aldolase	2-dehydro-3-deoxygluconokinase	2-dehydro-3-deoxygluconokinase/2-dehydro-3-deoxygalactonokinase	2-dehydro-3-deoxyphosphooctonate aldolase	2-dehydropantoate 2-reductase	2-hydroxy-3-keto-5-methylthiopentenyl-1-phosphate phosphatase	2-hydroxy-3-oxopropionate reductase	2-hydroxy-6-oxo-6-phenylhexa-2,4-dienoate hydrolase	2-hydroxy-6-oxononadienedioate/2-hydroxy-6-oxononatrienedioate hydrolase	2-iminobutanoate/2-iminopropanoate deaminase	2-isopropylmalate synthase	2-keto-3-deoxy-L-rhamnonate aldolase	2-keto-3-deoxygluconate permease	2-methoxy-6-polyprenyl-1,4-benzoquinol methylase, mitochondrial	2-methylisocitrate lyase	2-oxoacid:ferredoxin oxidoreductase 1, subunit alpha	2-oxoacid:ferredoxin oxidoreductase 2, subunit alpha	2-oxoglutarate dehydrogenase E1 component	2-oxoglutarate synthase subunit KorA
1001	PRJDB4176	DRR127478	11	17	1	9	64	31	33	9	32	153	28	2	74	18	34	1	1	40	9	32	6	8	15	14	19	26	48	2	8	14	19	52	32	2	24	1	1	26	39	3	7	82	6	3	3	4	3
1002	PRJDB4176	DRR127481	14	30	8	12	60	32	45	11	48	213	22	3	98	27	48	4	6	59	9	36	7	7	22	15	31	41	49	1	6	25	22	81	28	3	19	0	0	45	50	3	7	150	11	9	3	8	1
1003	PRJDB4176	DRR127485	13	40	3	16	110	44	68	11	96	362	56	2	185	28	47	6	6	111	7	86	14	10	32	7	32	62	98	4	10	36	42	101	36	2	27	0	5	52	90	3	5	202	13	13	2	4	3
1004	PRJDB4176	DRR127488	6	29	0	6	82	31	44	7	60	213	37	2	120	22	53	1	2	71	5	57	8	9	17	7	21	39	65	0	9	30	24	67	28	5	16	0	2	33	60	4	3	128	6	6	4	2	4
1005	PRJDB4176	DRR127491	3	14	0	4	38	14	26	2	28	96	23	1	65	7	21	2	1	27	6	23	2	3	6	4	7	16	37	1	4	10	14	30	16	0	10	0	0	18	30	1	3	51	2	2	1	0	1
1006	PRJDB4176	DRR127507	11	17	0	7	50	23	28	7	33	156	39	4	75	19	47	3	1	41	8	42	2	3	10	3	21	29	38	2	3	13	17	46	19	2	19	0	1	31	39	3	7	87	5	4	3	7	0
1007	PRJDB4176	DRR127509	13	27	1	12	76	31	40	10	46	196	32	3	106	18	45	2	2	57	5	55	4	7	22	12	25	36	67	2	4	22	24	59	31	2	29	0	1	41	48	2	6	119	5	8	3	6	2
1008	PRJDB4176	DRR127514	6	10	1	8	45	17	25	4	26	92	22	4	51	12	27	2	1	40	8	51	3	4	10	9	16	29	41	0	3	8	19	32	10	0	17	0	2	21	28	1	6	58	4	3	2	7	1
1009	PRJDB4176	DRR127515	21	53	13	18	148	70	87	17	102	420	61	5	221	42	89	2	9	127	11	79	11	22	42	23	48	57	105	9	12	40	44	138	62	8	43	0	8	67	111	6	12	248	8	15	4	14	12
2001	PRJEB10878	ERR1018278	12	13	1	9	67	25	30	7	41	148	29	5	99	13	38	1	2	39	4	22	3	9	17	11	17	27	46	2	6	19	25	45	27	1	14	0	0	32	40	3	8	106	6	5	2	2	1
2002	PRJEB10878	ERR1018279	8	0	0	2	26	9	9	1	11	49	14	2	26	7	16	0	0	11	3	11	1	4	4	7	6	7	11	0	2	4	5	12	9	0	8	0	0	12	15	1	3	29	4	0	1	3	0
2003	PRJEB10878	ERR1018280	11	12	1	8	66	34	44	7	49	198	38	2	102	11	29	2	1	54	5	34	7	4	12	6	24	35	58	1	10	18	26	49	34	0	19	1	1	26	57	3	6	91	7	4	1	1	1
2004	PRJEB10878	ERR1018281	20	33	7	15	75	25	43	12	57	204	13	6	89	25	49	6	6	68	10	50	9	9	38	17	16	30	56	2	1	16	23	75	28	2	22	1	4	41	52	7	4	137	10	7	6	9	5
2004	PRJEB10878	ERR1018282	4	8	3	3	40	26	26	3	37	151	22	3	68	9	27	1	3	47	10	57	3	6	12	4	10	25	26	1	2	14	14	28	21	0	7	1	6	21	34	1	1	102	3	3	1	4	4
2005	PRJEB10878	ERR1018283	19	24	0	8	68	27	36	6	47	233	46	4	129	17	42	4	3	66	3	52	5	10	21	12	27	37	54	3	5	22	24	54	32	1	28	1	4	42	66	7	16	181	8	6	2	13	0
2006	PRJEB10878	ERR1018284	9	20	1	6	58	28	40	6	40	168	42	3	75	19	43	3	0	48	3	41	3	9	10	5	17	22	38	2	3	17	18	45	25	1	26	0	2	29	45	0	5	108	6	4	3	4	3
2007	PRJEB27928	ERR2726404	7	22	3	7	63	22	45	8	50	180	41	4	98	10	33	2	4	52	5	39	4	7	16	7	18	27	45	1	4	18	19	40	20	1	23	1	1	28	49	2	8	100	5	4	1	4	2
2008	PRJEB27928	ERR2726405	9	16	0	10	68	31	50	10	46	165	37	3	100	19	34	2	5	45	4	52	3	8	16	8	19	32	45	0	7	24	23	58	26	2	18	1	0	31	47	1	8	102	4	9	1	0	0
2009	PRJDB4176	DRR127517	8	21	3	11	88	39	55	6	71	246	43	3	116	22	29	3	4	59	4	79	4	6	15	8	12	37	60	5	13	27	21	87	31	3	23	0	1	45	61	3	5	123	7	10	0	6	4
10010	PRJDB4176	DRR127519	16	31	1	15	88	38	59	9	56	242	40	1	127	22	49	1	5	65	10	53	12	8	20	10	26	44	59	1	8	27	28	84	32	1	21	1	1	45	66	1	4	166	11	7	3	5	1
10011	PRJDB4176	DRR127521	8	16	1	7	37	25	29	7	29	145	30	2	70	12	35	1	1	30	7	31	6	9	8	6	19	19	38	1	4	11	19	42	21	0	14	0	1	27	34	3	7	85	4	6	2	2	1
10012	PRJDB4176	DRR127524	16	26	5	11	70	38	47	10	57	231	40	3	107	22	53	3	0	60	9	50	5	14	21	20	37	41	67	2	5	24	32	68	38	2	37	1	2	34	56	4	10	137	8	7	3	7	2
10013	PRJDB4176	DRR127532	10	23	1	7	87	33	45	8	66	231	34	4	119	26	51	4	3	74	10	65	7	15	30	10	26	37	76	3	7	18	37	83	32	2	24	0	3	54	64	5	5	141	6	5	4	7	3
10014	PRJDB4176	DRR127535	14	13	5	11	57	29	37	8	36	166	31	5	92	22	35	1	1	43	6	46	4	8	17	10	23	29	55	2	2	21	17	55	24	2	26	2	4	32	47	0	12	107	6	5	3	3	2
10015	PRJDB4176	DRR127536	5	18	0	6	55	21	35	6	34	112	21	1	75	15	27	1	2	41	7	35	2	8	16	3	14	23	37	1	6	14	18	41	16	1	14	3	0	22	38	4	3	66	3	3	2	2	1
10016	PRJDB4176	DRR127537	13	22	1	11	66	34	43	10	41	164	20	2	82	17	36	0	2	44	3	35	2	9	17	13	25	31	57	2	8	15	23	65	30	2	23	0	0	29	47	0	7	97	6	9	3	5	4
10017	PRJDB4176	DRR127546	8	14	1	1	63	24	43	2	39	131	37	2	65	16	40	0	1	38	5	37	3	5	3	4	11	15	32	1	6	9	12	39	22	0	29	1	2	24	42	1	10	82	6	0	3	7	4
10018	PRJDB4176	DRR127552	15	28	2	11	90	44	56	10	75	253	32	3	124	23	50	0	7	66	11	48	9	10	18	11	22	39	75	2	5	28	32	86	40	1	20	0	4	47	63	2	7	165	8	12	1	6	3
10019	PRJDB4176	DRR127557	5	9	0	5	29	17	20	5	26	97	15	2	50	11	22	1	0	24	6	28	1	5	5	6	16	22	33	0	5	15	9	34	16	0	14	0	1	17	32	4	6	54	3	3	0	4	0
10020	PRJDB4176	DRR127559	17	25	1	17	73	25	37	6	42	174	23	5	86	24	52	1	3	48	8	36	4	12	22	13	23	32	50	3	5	17	26	58	23	3	27	0	2	29	43	7	7	83	11	9	2	4	4
10021	PRJDB4176	DRR127567	16	19	0	12	81	41	45	11	46	197	25	4	103	24	48	1	3	59	4	44	4	11	22	13	22	37	63	0	3	25	24	67	29	4	24	1	0	27	53	3	5	123	9	13	2	4	3
10022	PRJDB4176	DRR127579	13	8	0	6	38	13	17	4	23	96	17	3	44	14	23	3	0	24	6	37	1	9	12	9	12	12	25	2	1	13	13	26	16	1	20	0	2	25	26	2	3	55	9	3	3	4	0
10023	PRJDB4176	DRR127580	8	13	1	4	45	20	26	4	25	154	28	4	63	18	34	4	1	36	5	39	4	7	9	12	18	13	34	2	6	19	22	39	28	0	28	0	2	15	35	3	8	77	12	3	3	7	0
10024	PRJDB4176	DRR127583	14	31	4	14	84	44	52	7	65	250	37	2	119	22	52	1	5	64	10	58	7	8	25	19	27	36	73	1	6	25	25	69	34	1	29	1	2	42	63	5	8	153	10	10	2	11	3
10025	PRJDB4176	DRR127588	10	19	6	9	87	38	48	9	59	251	39	2	128	14	43	2	3	60	3	44	12	8	24	14	27	44	74	1	9	32	35	68	36	0	27	1	0	40	69	2	7	139	6	9	0	7	2
10026	PRJDB4176	DRR127594	7	12	1	4	25	11	14	1	18	68	4	2	31	6	18	0	2	23	3	33	2	0	7	3	7	15	30	1	2	7	9	15	11	1	4	0	1	14	19	0	2	38	2	2	1	1	0
10027	PRJDB4176	DRR127596	11	30	2	8	82	35	49	8	55	182	34	1	116	21	42	2	1	62	5	60	8	8	20	3	22	36	56	4	7	16	26	55	28	2	21	0	2	28	55	3	8	102	4	2	4	5	1
10028	PRJDB4176	DRR127597	12	20	4	4	64	22	36	6	35	170	51	3	92	16	37	4	1	50	10	51	6	7	6	7	19	25	40	0	6	17	20	39	19	1	20	0	0	37	55	2	3	116	5	3	3	17	0
10029	PRJDB4176	DRR127646	8	31	3	10	82	33	46	9	55	249	25	6	103	18	42	1	4	76	8	69	6	5	25	12	20	43	62	2	7	40	24	72	29	1	21	0	3	34	66	0	1	125	10	6	4	2	5
10030	PRJDB4176	DRR127647	10	32	5	13	87	44	53	7	78	288	36	3	133	17	46	3	4	81	8	78	15	7	25	16	20	46	66	2	5	29	33	69	34	3	20	1	5	36	72	0	6	202	5	5	3	6	3
10031	PRJDB4176	DRR127649	14	12	2	8	39	21	27	6	31	120	19	3	55	15	28	0	0	30	6	27	2	6	10	16	16	22	34	1	3	8	19	44	15	0	18	0	0	19	28	1	8	60	4	4	1	6	2
10032	PRJDB4176	DRR127666	21	27	4	10	97	49	66	10	69	282	25	4	113	26	60	4	8	72	6	69	8	11	27	19	26	41	83	2	7	38	25	79	30	2	29	0	6	58	70	3	9	163	11	10	2	10	6
10033	PRJDB4176	DRR127669	15	26	1	13	65	29	33	8	41	145	23	3	63	21	45	4	3	54	8	46	3	4	20	7	15	26	47	1	7	15	19	61	21	2	12	0	3	30	44	1	3	87	4	6	5	4	3
10034	PRJDB4176	DRR127672	8	14	1	7	57	28	34	5	43	156	26	1	102	12	31	3	0	52	4	47	4	4	10	13	24	28	48	1	5	15	22	45	24	1	17	0	0	23	48	1	5	92	6	3	3	3	1
10035	PRJDB4176	DRR127674	6	15	4	9	43	22	33	8	34	143	17	2	73	13	29	4	1	37	7	32	6	6	11	11	18	23	38	2	4	18	20	46	21	0	20	0	0	25	38	1	3	81	6	6	1	5	3
10036	PRJDB4176	DRR127683	14	27	3	14	87	38	50	14	66	244	29	3	112	33	54	2	3	71	4	63	8	12	27	13	22	40	79	2	6	23	22	88	33	3	32	0	3	44	52	9	10	143	6	13	4	5	6
10037	PRJDB4176	DRR127685	9	13	1	8	40	20	20	5	25	119	10	1	50	17	34	2	3	26	2	37	2	10	17	10	13	14	32	3	3	18	11	53	16	1	19	0	1	23	35	5	8	63	6	7	2	7	2
10038	PRJDB4176	DRR127692	9	28	2	9	94	42	56	8	56	224	58	3	123	26	48	6	3	78	8	71	8	9	14	7	30	35	65	2	16	20	39	69	35	1	33	0	2	48	67	2	7	129	3	7	2	15	2
10039	PRJDB4176	DRR127700	12	24	0	12	76	34	42	6	45	181	26	6	91	21	37	1	6	50	7	51	8	8	21	13	21	37	53	1	4	22	28	66	26	0	16	1	0	32	50	2	3	130	9	6	4	6	3
10040	PRJDB4176	DRR127704	12	34	6	11	74	36	43	8	58	223	22	7	82	24	41	5	8	71	9	69	8	12	39	24	22	34	62	7	2	21	21	86	32	4	32	1	2	43	55	2	3	157	6	6	5	7	9
10041	PRJDB4176	DRR127707	16	19	1	10	60	32	41	7	47	191	25	6	95	19	47	2	6	56	8	44	3	2	20	14	28	31	60	4	7	15	18	57	24	3	25	0	0	37	53	3	8	111	11	8	3	7	3
10042	PRJDB4176	DRR127708	12	13	2	9	75	36	45	6	49	201	39	1	120	16	39	1	1	56	8	43	5	5	16	12	28	33	63	3	6	20	30	47	36	1	18	0	0	30	51	3	9	107	8	4	1	6	1
10043	PRJDB4176	DRR127713	13	29	3	15	57	30	32	10	48	226	26	4	95	23	41	4	1	55	10	50	4	11	26	13	20	27	65	3	6	24	34	74	22	4	32	1	3	31	49	2	2	131	12	7	4	7	6
10044	PRJDB4176	DRR127718	9	11	0	7	38	22	22	5	26	129	19	3	64	10	25	3	0	28	3	29	2	6	12	7	12	17	36	2	4	14	21	33	18	1	19	0	1	11	28	2	5	48	7	5	1	3	1
10045	PRJDB4176	DRR127720	5	9	0	6	35	14	18	6	19	100	12	2	49	10	26	0	0	24	4	21	1	6	8	9	13	16	24	1	2	12	13	36	18	1	27	0	0	16	20	5	11	51	4	3	2	4	1
10046	PRJDB4176	DRR127721	17	36	4	16	99	49	59	16	73	287	41	5	129	32	65	2	5	78	5	66	12	18	35	23	25	48	87	1	9	31	34	102	42	2	41	1	2	50	73	4	9	197	6	11	5	11	5
10047	PRJDB4176	DRR127724	8	13	1	10	44	21	26	9	23	99	21	4	51	14	32	0	0	25	9	21	2	7	11	9	25	24	36	2	2	12	19	47	17	2	20	0	0	20	25	2	8	55	4	7	1	1	2
10048	PRJDB4176	DRR127728	11	11	3	5	55	31	34	3	33	200	35	2	80	11	44	3	0	42	8	39	4	9	7	10	24	25	52	1	2	18	28	52	27	2	43	2	0	34	42	6	11	93	7	3	1	10	3
10049	PRJDB4176	DRR127731	6	14	1	8	40	18	27	3	24	104	20	3	48	9	31	0	0	29	4	31	3	5	8	4	12	23	40	3	4	12	12	37	18	0	16	0	0	31	30	1	5	56	5	3	0	4	1
10050	PRJDB4176	DRR127737	13	20	2	9	65	33	40	8	43	180	30	4	92	19	42	0	3	49	7	44	4	9	13	15	27	39	47	3	3	25	20	59	27	1	32	2	1	30	50	3	11	104	8	5	1	10	1
10052	PRJDB4176	DRR127748	15	26	1	11	86	36	48	13	54	182	39	6	106	22	55	0	1	61	4	62	4	14	24	10	24	33	56	3	4	14	26	74	38	1	33	0	2	37	63	4	6	111	3	8	3	9	3
10053	PRJDB4176	DRR127751	9	21	0	8	51	25	29	6	34	115	18	3	69	13	24	3	0	38	4	33	3	8	9	7	19	25	37	2	4	13	22	36	20	1	18	0	1	20	35	0	4	55	3	4	2	1	2
10054	PRJDB4176	DRR127752	11	19	0	1	57	22	32	3	33	131	46	5	57	17	40	3	2	40	5	35	3	14	5	5	20	24	32	1	5	12	15	34	17	1	25	1	0	29	38	3	6	89	5	2	2	11	0
10055	PRJDB4176	DRR127754	7	17	0	8	42	22	31	9	31	115	28	4	64	16	28	0	0	37	10	21	2	7	12	13	23	27	44	1	4	13	25	52	21	1	19	1	0	27	35	2	6	89	7	4	5	3	2
10056	PRJDB4176	DRR127755	14	28	0	13	81	36	47	10	57	219	36	4	112	21	35	3	3	63	4	58	5	8	21	13	26	34	59	5	2	21	27	70	28	1	29	1	1	38	52	6	14	139	1	6	5	3	3
10057	PRJDB4176	DRR127756	14	12	2	6	71	29	45	4	51	183	49	3	96	17	44	1	2	50	7	40	4	5	6	5	16	30	49	3	3	28	24	51	30	0	27	0	0	38	48	5	8	103	10	5	2	7	0
10058	PRJDB4176	DRR127762	16	24	5	4	72	32	38	7	50	228	57	2	100	19	55	2	1	67	3	52	6	8	11	11	25	42	58	3	4	19	23	50	17	1	25	1	2	48	73	0	13	132	13	2	1	13	0
10059	PRJDB4176	DRR127763	10	23	1	13	71	30	42	11	57	184	22	5	105	23	44	2	4	67	7	55	7	8	13	10	24	40	57	0	2	26	24	65	31	0	25	0	1	39	53	2	5	120	9	9	4	5	2
10060	PRJNA447983	SRR6915169	12	42	1	14	84	38	53	11	62	239	28	2	102	18	52	1	6	74	4	69	3	9	32	13	21	37	70	2	6	22	30	74	35	2	24	1	1	33	63	3	9	140	6	10	4	3	2
10061	PRJNA447983	SRR6915170	7	14	3	6	51	24	34	1	34	137	22	2	76	13	28	1	5	41	5	35	5	3	11	2	9	23	32	2	7	15	13	34	17	0	9	0	0	14	35	2	2	66	2	5	1	5	0
10062	PRJNA447983	SRR6915171	4	8	1	5	59	25	36	1	39	165	35	2	103	8	28	3	3	47	7	35	6	6	8	1	12	35	37	1	7	20	21	35	26	0	12	0	1	20	52	1	2	78	1	1	3	0	1
10063	PRJNA447983	SRR6915172	3	12	3	5	58	31	43	5	37	160	32	1	104	9	31	1	1	43	8	35	5	4	6	2	14	25	41	1	6	16	18	32	28	0	16	0	0	22	35	0	4	97	4	3	1	3	0
10064	PRJNA447983	SRR6915173	10	16	2	8	61	31	39	5	46	157	32	2	92	15	46	1	3	48	7	35	4	6	12	15	23	24	46	1	4	20	17	40	23	2	21	1	3	23	51	1	6	105	5	3	1	4	2
10065	PRJNA447983	SRR6915174	6	14	0	4	51	23	30	3	29	113	27	2	78	12	24	0	1	36	2	50	4	3	11	4	10	27	34	1	6	20	8	36	23	1	13	0	0	18	38	1	5	68	1	3	1	0	0
10066	PRJNA447983	SRR6915175	10	14	2	6	68	31	39	6	46	176	27	4	93	15	30	2	3	46	5	62	4	6	16	15	24	28	37	2	2	17	10	53	25	2	24	0	2	26	48	3	6	109	2	6	1	6	3
10067	PRJNA447983	SRR6915176	7	13	0	10	77	34	46	8	51	189	32	2	110	16	38	0	2	54	6	44	7	5	15	4	21	36	51	1	6	27	25	53	31	2	17	1	0	20	56	1	3	94	5	8	0	2	3
10068	PRJNA447983	SRR6915177	2	12	0	4	36	19	23	3	26	112	19	1	74	4	19	0	1	31	6	27	2	3	8	4	5	22	24	1	4	13	15	30	14	0	6	0	0	13	30	2	1	52	1	0	0	1	2
10069	PRJNA447983	SRR6915178	4	14	4	4	58	27	35	1	34	169	30	3	95	10	24	1	1	46	6	51	8	8	14	3	13	33	45	2	3	21	21	29	23	1	11	1	3	27	44	1	3	98	2	2	0	0	2
10070	PRJNA447983	SRR6915179	11	25	1	10	73	36	44	5	45	200	32	5	110	15	49	3	2	54	7	41	6	13	14	8	16	35	54	2	2	18	21	53	38	1	23	1	1	24	54	0	5	124	9	6	0	19	2
10071	PRJNA447983	SRR6915180	9	21	4	11	102	41	49	3	54	221	45	4	126	19	48	3	4	58	6	47	5	15	18	8	20	40	68	3	3	32	24	69	36	0	21	0	1	41	70	3	9	132	8	4	2	7	5
10072	PRJNA447983	SRR6915181	7	22	3	9	81	33	48	8	44	175	38	3	96	17	41	3	1	58	5	47	4	6	17	9	21	28	50	1	2	28	17	57	38	1	28	0	1	32	57	1	9	117	3	4	1	6	4
10073	PRJNA447983	SRR6915182	11	27	3	15	73	35	42	10	50	220	28	1	114	26	46	1	1	69	9	78	4	8	26	13	17	39	60	5	8	28	16	57	34	3	21	0	1	38	59	4	5	108	2	11	1	3	2
10074	PRJNA447983	SRR6915183	10	27	6	12	71	31	41	9	56	224	25	4	89	23	44	3	1	55	14	62	3	7	23	15	23	32	54	6	5	13	18	64	30	4	26	0	1	35	48	2	5	129	5	5	3	9	5
10075	PRJNA447983	SRR6915184	4	23	5	5	73	42	48	2	54	226	41	1	116	14	30	1	4	60	6	58	3	9	13	9	16	32	54	1	8	17	28	49	30	0	23	0	0	26	52	3	6	134	4	3	0	5	5
10076	PRJNA447983	SRR6915185	5	19	1	7	61	24	38	6	38	154	26	3	88	11	35	1	1	42	6	43	1	3	15	4	13	34	46	1	6	19	19	46	25	0	18	1	0	20	45	2	4	85	3	6	0	3	2
10077	PRJNA447983	SRR6915186	4	11	2	7	81	33	50	1	49	204	38	0	111	8	34	1	2	51	4	45	7	5	11	4	10	36	50	1	3	25	18	45	32	2	9	0	0	32	53	2	3	104	3	2	2	3	0
10078	PRJNA447983	SRR6915187	5	24	3	6	64	28	39	8	36	148	22	1	73	17	35	1	0	46	5	55	2	7	10	9	22	26	42	1	1	17	32	40	26	1	23	0	0	22	44	1	4	82	3	3	1	5	2
10079	PRJNA447983	SRR6915188	6	12	0	11	34	16	25	6	26	89	9	1	37	17	25	0	4	23	1	45	1	0	16	5	10	11	23	1	2	11	14	37	13	2	10	0	2	18	24	0	1	64	2	8	2	0	0
10080	PRJNA447983	SRR6915189	9	19	3	12	59	27	38	10	45	162	18	4	77	19	40	0	4	49	4	60	2	11	26	10	19	26	52	2	7	18	19	58	23	2	18	1	3	25	46	2	3	98	4	8	1	3	3
10081	PRJNA447983	SRR6915190	7	22	5	10	86	38	52	7	54	194	34	1	130	20	47	1	5	56	5	53	1	4	15	9	26	27	65	2	4	35	20	55	34	1	23	1	1	33	58	4	6	128	4	9	2	5	1
10082	PRJEB10878	ERR1018185	14	34	9	16	100	52	56	14	84	303	33	6	126	23	58	2	11	82	9	60	8	12	40	23	29	49	87	2	5	38	31	87	36	1	35	1	3	48	81	8	5	176	11	12	4	10	4
10083	PRJEB10878	ERR1018186	11	29	5	14	103	40	51	7	79	345	54	4	151	16	53	8	6	101	7	90	9	19	33	10	23	48	81	4	8	38	30	90	43	1	33	3	5	50	74	3	9	213	12	6	0	12	11
10084	PRJEB10878	ERR1018188	11	12	1	10	49	22	29	7	41	145	21	4	82	13	28	2	4	39	6	34	6	7	14	7	17	26	47	1	7	30	27	44	28	0	15	0	2	33	40	4	4	117	7	6	2	2	0
10086	PRJEB10878	ERR1018189	10	23	5	12	87	38	52	10	64	276	48	6	141	17	54	6	4	67	8	52	11	7	23	9	29	48	78	0	3	30	31	79	35	3	32	2	1	39	68	6	10	168	5	9	0	5	4
10087	PRJEB10878	ERR1018190	14	20	5	11	63	28	36	6	61	225	18	4	97	18	37	2	8	68	5	57	9	5	28	16	17	33	45	6	7	31	22	64	31	0	12	1	2	40	44	1	4	141	4	6	2	5	9
10088	PRJEB10878	ERR1018191	10	13	3	7	42	17	22	5	25	129	12	6	61	10	26	2	2	36	5	14	6	4	13	10	15	19	43	0	4	12	10	30	20	2	17	0	2	21	23	2	5	76	6	5	1	2	1
10089	PRJEB10878	ERR1018192	6	17	3	9	53	23	32	4	36	197	32	2	73	9	26	3	1	43	7	38	3	7	12	6	12	24	41	2	4	11	14	41	25	0	32	0	0	21	33	6	8	80	6	4	0	7	1
10090	PRJDB4176	DRR127767	8	14	1	6	49	20	26	6	32	117	25	2	60	11	29	0	0	36	5	29	5	5	10	8	19	20	31	1	0	12	18	43	14	2	17	1	1	31	31	2	4	89	4	2	1	2	1
10091	PRJDB4176	DRR127774	14	41	9	15	105	50	58	10	75	310	37	3	139	31	53	7	5	91	8	72	3	8	37	19	24	51	71	3	8	28	31	98	36	3	33	1	3	51	74	4	9	202	6	9	4	11	3
10092	PRJDB4176	DRR127776	11	27	2	12	79	40	41	10	60	204	42	5	132	18	46	2	2	65	3	59	10	5	22	8	27	43	74	1	6	28	29	71	35	0	19	2	1	38	64	4	6	117	7	6	4	2	3
10093	PRJDB4176	DRR127777	8	15	1	3	40	19	23	2	29	114	30	4	72	7	30	3	0	37	5	33	3	6	4	6	11	16	26	1	6	14	19	37	22	0	11	0	0	26	32	0	4	71	3	1	2	6	0
10094	PRJDB4176	DRR127789	8	20	2	9	94	41	51	7	61	260	65	4	151	16	50	3	1	73	8	54	9	9	14	5	22	43	80	1	9	30	24	61	40	0	37	0	2	37	70	3	9	162	5	3	3	8	0
10095	PRJDB4176	DRR162775	14	43	13	21	114	60	75	14	82	349	39	5	170	38	78	2	8	105	10	73	3	12	46	21	34	59	98	3	9	38	38	108	56	5	47	1	4	59	107	9	9	189	5	12	4	7	4
10096	PRJDB4176	DRR162776	8	14	2	9	38	18	22	7	24	110	14	1	47	16	38	3	0	31	6	38	6	7	11	10	22	18	34	2	2	10	15	47	16	2	21	0	1	22	30	2	12	61	5	6	2	5	3
10097	PRJDB4176	DRR162777	11	17	0	9	49	19	26	9	26	121	16	2	54	11	32	2	1	29	4	38	3	8	14	9	17	22	40	1	1	12	18	41	18	1	17	0	2	24	25	5	11	57	5	6	2	2	3
10098	PRJDB4176	DRR162778	9	19	1	11	61	31	38	10	42	189	37	2	101	17	31	1	2	43	8	34	7	4	14	8	24	31	57	3	4	20	22	49	29	2	19	0	0	22	43	1	6	89	5	6	2	4	2
10099	PRJEB27928	ERR2726406	20	35	7	15	115	53	69	14	94	325	54	7	168	30	80	1	6	104	12	72	10	20	31	19	46	60	92	4	11	29	37	118	52	3	34	2	3	57	93	4	15	212	10	10	4	14	8
20010	PRJEB27928	ERR2726407	8	24	1	9	76	32	40	5	56	201	36	5	112	18	45	4	4	53	11	55	4	10	23	9	15	39	49	3	6	37	26	64	30	1	17	0	1	33	54	3	4	125	8	10	2	2	2
20011	PRJEB27928	ERR2726408	12	17	2	6	89	39	48	6	61	222	41	2	130	16	43	2	3	66	2	50	5	9	13	11	24	36	67	2	7	24	25	56	40	1	22	0	1	32	60	1	7	129	7	5	1	5	1
20012	PRJEB27928	ERR2726409	12	32	4	13	101	41	60	6	76	302	46	5	140	22	50	1	5	93	10	73	7	13	28	9	27	53	75	1	7	37	23	80	39	2	22	1	2	47	78	4	7	165	10	7	1	5	4
20013	PRJEB27928	ERR2726410	10	11	2	7	71	33	43	5	45	185	34	4	107	6	34	6	4	51	7	37	4	7	13	4	17	30	51	2	5	24	28	49	31	1	16	1	1	32	54	2	5	119	5	5	2	1	1
20014	PRJEB27928	ERR2726411	4	10	1	5	29	17	21	3	29	93	16	1	61	7	16	4	2	25	2	27	4	5	9	2	7	14	28	1	7	20	10	32	17	2	13	0	1	20	27	2	3	73	0	3	0	2	0
20015	PRJEB27928	ERR2726412	14	14	1	12	33	16	23	7	31	123	24	3	45	17	25	1	0	35	10	38	4	4	21	9	15	25	41	1	6	8	12	48	15	2	15	1	1	26	34	0	9	82	1	5	1	5	1
20016	PRJEB27928	ERR2726413	13	21	1	9	33	15	23	5	33	126	22	3	52	18	30	2	1	34	6	43	4	3	18	9	14	25	34	1	1	7	14	49	12	3	15	1	1	21	36	0	8	78	2	5	2	6	2
20017	PRJEB27928	ERR2726414	13	10	0	11	32	19	23	7	30	131	19	4	50	15	24	1	0	30	6	43	4	4	17	10	16	21	40	1	2	5	16	45	15	2	15	2	3	19	29	1	5	79	4	4	3	6	1
20018	PRJEB27928	ERR2726415	12	13	0	11	36	15	21	8	30	116	20	4	47	15	22	0	0	35	5	47	4	6	18	9	11	25	37	3	3	8	15	41	15	2	12	1	1	22	30	0	7	74	1	6	1	5	1
20019	PRJEB27928	ERR2726416	3	12	6	6	25	15	17	4	37	145	4	2	47	11	15	2	0	44	5	64	9	11	24	5	8	18	28	0	0	10	13	28	16	1	4	0	6	21	21	1	3	70	5	4	2	3	3
20020	PRJEB27928	ERR2726417	3	14	6	6	26	15	19	5	42	134	6	0	49	13	14	1	1	41	6	64	9	9	20	5	7	16	21	0	1	7	14	32	19	1	6	0	3	20	18	1	2	73	4	6	0	3	4
20021	PRJEB27928	ERR2726418	3	12	6	4	29	16	23	4	42	152	9	2	50	12	16	2	0	49	5	62	10	7	22	6	8	17	30	0	1	11	12	29	13	0	9	1	3	18	21	1	1	83	6	6	0	4	5
20022	PRJEB27928	ERR2726419	4	11	3	7	23	15	18	4	37	144	8	2	43	11	20	2	0	49	5	61	11	8	27	5	8	17	24	0	0	10	9	29	16	1	4	1	3	17	22	1	1	80	5	6	0	2	4
20023	PRJEB27928	ERR2726420	11	29	15	9	81	39	39	7	75	239	32	2	79	15	48	3	12	63	9	64	7	9	27	9	12	35	53	1	8	32	32	87	33	2	21	3	2	33	51	5	6	163	3	5	1	5	5
20024	PRJEB27928	ERR2726421	8	23	2	5	67	33	54	8	58	204	24	2	112	18	41	0	2	72	8	64	7	8	16	4	22	37	60	3	6	23	16	55	25	3	12	1	2	34	58	2	0	120	6	7	4	1	3
20025	PRJEB27928	ERR2726422	15	24	3	13	99	45	63	9	80	270	43	6	150	23	53	5	6	82	6	69	9	11	23	14	31	52	83	2	6	26	25	76	37	1	28	1	1	49	75	3	4	158	8	10	2	6	1
20026	PRJEB27928	ERR2726423	15	17	3	17	59	34	42	11	54	180	17	4	97	20	41	5	3	61	7	55	10	12	23	14	21	33	55	2	7	28	23	64	25	0	16	0	4	27	37	1	5	142	7	11	0	3	4
20027	PRJEB27928	ERR2726424	11	20	4	7	48	23	26	4	50	184	20	2	73	19	31	1	5	53	8	72	2	5	23	6	12	24	45	3	1	16	18	45	11	1	9	0	1	25	37	1	4	92	0	12	1	3	5
20028	PRJEB27928	ERR2726425	13	15	2	11	38	21	34	3	45	176	17	2	69	21	30	0	1	52	8	76	2	5	23	5	11	29	41	2	1	13	15	45	17	2	12	0	1	20	36	2	1	77	2	10	1	3	5
20029	PRJEB27928	ERR2726426	12	17	1	12	45	21	36	4	47	173	13	1	68	15	32	2	3	54	6	68	2	5	26	4	14	24	41	2	2	22	17	44	15	1	7	0	2	25	33	1	4	80	1	8	2	3	4
20030	PRJEB27928	ERR2726427	8	21	3	10	47	22	29	4	38	168	13	3	65	20	28	1	2	51	7	58	2	4	23	2	10	29	37	1	1	16	14	47	13	1	11	0	2	26	32	1	4	78	2	11	1	1	5
20031	PRJEB27928	ERR2726428	16	30	7	16	96	46	48	16	84	288	47	4	134	23	55	2	9	86	10	90	9	12	34	10	27	53	65	0	1	37	27	79	34	2	22	1	4	49	72	5	7	188	6	12	1	9	5
20032	PRJEB27928	ERR2726429	5	8	1	3	56	25	34	5	35	139	30	1	78	6	25	1	1	40	5	19	3	8	6	9	15	25	37	0	7	18	18	35	24	0	14	0	0	29	38	0	6	83	7	0	1	2	0
20033	PRJEB27928	ERR2726430	14	28	4	13	80	43	50	8	75	298	28	5	131	23	48	3	3	95	8	76	13	12	31	7	17	53	77	1	7	35	31	77	33	2	13	0	4	48	69	4	3	171	3	3	3	5	7
20034	PRJEB27928	ERR2726431	4	17	2	11	67	30	45	8	52	203	32	1	101	16	34	0	1	71	8	74	4	3	14	2	16	31	55	1	7	19	27	60	24	2	13	0	1	28	50	1	6	114	1	6	1	0	3
20035	PRJEB27928	ERR2726432	8	23	10	10	70	30	42	5	53	176	22	2	85	15	39	2	3	65	13	53	5	7	21	10	16	31	52	0	5	24	22	53	23	2	20	0	0	34	52	0	4	122	4	6	1	2	4
20036	PRJEB27928	ERR2726433	11	32	5	8	103	47	63	7	87	313	50	2	154	23	54	3	4	97	3	80	13	10	28	11	17	56	87	1	10	39	32	84	49	2	20	2	3	48	71	2	6	174	10	8	2	6	3
20037	PRJEB27928	ERR2726434	12	27	7	12	87	41	52	8	86	302	36	4	133	26	50	1	7	102	5	84	6	11	35	10	13	42	73	1	4	29	32	94	27	2	25	1	4	51	70	5	3	176	3	9	2	8	5
20038	PRJEB27928	ERR2726435	11	21	2	7	81	34	46	8	55	220	34	3	118	17	47	2	6	61	6	59	5	5	22	12	14	27	51	2	7	18	19	58	31	3	17	0	1	39	53	2	3	139	10	4	4	2	1
20039	PRJEB27928	ERR2726436	12	31	1	17	99	44	57	13	80	266	49	7	149	22	59	1	3	85	7	79	8	7	31	7	23	41	79	1	2	34	30	78	42	1	27	1	2	47	71	4	4	154	8	11	3	4	5
20040	PRJEB27928	ERR2726437	12	26	4	14	95	46	50	13	79	267	41	4	117	21	54	5	5	68	11	58	8	11	27	12	20	47	65	1	13	41	31	89	41	3	19	1	3	47	67	2	6	145	7	9	3	4	5
20041	PRJEB27928	ERR2726438	3	11	4	6	47	21	27	2	42	156	19	2	72	9	27	1	3	49	10	58	4	6	15	5	10	25	29	1	1	18	14	38	23	0	13	1	2	21	35	2	0	94	3	2	2	3	3
20042	PRJEB27928	ERR2726439	4	13	4	7	48	21	25	4	41	162	24	2	63	9	30	1	3	49	8	44	4	5	15	7	9	21	36	2	2	19	17	34	20	2	11	1	1	25	25	2	1	88	2	1	3	4	3
20043	PRJEB27928	ERR2726440	6	9	3	4	43	16	21	3	41	163	24	2	63	9	28	1	3	47	7	51	4	6	15	5	9	24	32	2	3	14	15	38	21	1	12	1	1	22	33	1	0	100	3	4	2	5	2
20045	PRJEB27928	ERR2726441	4	14	3	9	52	29	30	4	38	150	28	4	81	12	33	1	3	39	5	49	7	7	19	9	17	19	42	1	4	25	10	41	21	1	14	0	2	24	44	3	3	90	2	5	2	1	2
20046	PRJEB27928	ERR2726442	8	19	2	7	99	45	59	6	68	230	40	1	135	17	47	2	2	67	6	57	6	7	19	5	27	48	73	1	5	21	22	58	34	1	16	1	1	38	66	0	2	129	6	4	4	0	2
20047	PRJEB27928	ERR2726443	11	16	0	11	52	29	37	4	51	194	34	3	97	16	44	2	5	56	4	57	6	4	17	8	15	30	49	1	8	33	22	53	25	2	10	0	1	37	45	1	1	116	6	7	4	0	1
20048	PRJEB27928	ERR2726444	10	24	1	12	89	44	60	7	67	244	36	2	139	20	52	2	3	77	5	73	9	6	21	8	20	41	63	4	8	40	29	72	36	2	14	0	3	44	68	2	2	145	7	7	2	1	4
20049	PRJEB27928	ERR2726453	3	13	0	7	38	19	23	6	27	103	18	1	49	9	25	2	1	30	3	40	0	4	13	4	5	12	30	1	5	15	12	39	17	0	8	0	0	15	29	1	5	44	1	3	0	0	3
20050	PRJEB27928	ERR2726454	5	15	0	5	37	20	26	7	22	94	18	1	48	11	26	0	1	29	3	36	0	6	12	2	3	12	25	0	5	13	9	38	14	0	12	0	0	14	25	0	5	42	1	4	0	0	3
20051	PRJEB27928	ERR2726455	6	13	0	7	37	18	20	7	24	94	18	1	50	12	28	3	1	30	5	38	0	5	14	5	6	14	28	0	5	13	13	35	12	0	11	0	0	11	30	1	5	41	1	4	0	0	1
20052	PRJEB27928	ERR2726456	4	9	0	4	35	17	22	7	26	93	16	1	46	10	20	1	1	29	6	34	0	3	12	2	4	15	26	0	6	11	7	41	9	0	7	0	0	14	29	1	5	38	1	4	0	0	2
20053	PRJEB27928	ERR2726457	10	19	1	12	52	26	35	8	37	125	23	2	75	12	33	0	1	48	8	40	1	4	13	9	24	25	45	1	7	16	15	52	25	2	9	0	2	24	35	1	4	74	7	5	4	0	2
20054	PRJEB27928	ERR2726458	12	18	3	11	71	33	46	7	55	189	28	2	84	15	37	1	4	51	6	48	2	8	18	7	18	30	47	1	4	22	28	67	27	0	17	0	1	27	46	1	3	102	7	7	1	5	1
20055	PRJEB27928	ERR2726459	3	30	5	13	77	34	43	6	66	252	46	2	102	15	37	4	4	59	9	87	4	12	18	7	8	36	59	4	6	26	20	92	26	1	17	0	1	40	57	3	7	128	5	3	1	3	1
20056	PRJEB27928	ERR2726460	1	15	0	7	61	24	26	8	51	159	30	1	70	10	24	1	4	32	4	40	6	7	12	2	3	21	40	3	11	26	15	58	27	1	16	0	2	26	40	5	2	79	2	3	1	4	1
20057	PRJEB27928	ERR2726461	11	31	5	15	82	47	51	7	55	212	31	4	106	24	47	5	3	58	5	62	5	8	20	12	24	29	66	2	7	19	18	78	30	2	27	0	2	48	58	3	7	134	6	10	2	7	1
20058	PRJEB27928	ERR2726462	13	39	3	15	108	48	60	12	82	307	50	3	170	25	59	1	5	98	8	72	9	16	27	13	28	51	80	4	8	32	30	96	48	3	24	2	3	43	70	3	7	162	4	8	4	6	3
20059	PRJEB27928	ERR2726463	9	12	2	6	43	19	27	4	28	126	13	1	60	9	31	1	4	40	4	30	1	3	13	4	11	17	33	1	3	13	13	37	18	0	11	0	0	21	32	0	1	72	2	3	1	1	1
20060	PRJEB27928	ERR2726464	11	16	1	6	38	20	27	3	27	124	15	0	62	12	30	2	3	36	6	24	2	3	12	3	11	19	33	0	4	13	13	39	13	0	11	0	0	14	31	0	2	71	3	6	1	1	1
20061	PRJEB27928	ERR2726465	7	9	4	7	36	19	26	3	31	112	15	4	61	11	31	0	4	34	4	33	2	3	14	6	10	21	30	1	3	13	12	33	16	0	10	0	0	17	27	0	1	70	4	3	0	1	0
20062	PRJEB27928	ERR2726466	10	14	1	6	41	19	26	2	28	124	13	3	65	12	31	1	2	35	4	30	2	5	10	2	11	20	33	2	5	12	10	37	18	0	9	0	0	16	29	0	2	67	3	3	1	2	0
20063	PRJEB27928	ERR2726467	5	12	2	4	48	18	29	5	44	167	20	3	79	8	28	2	2	50	8	57	5	7	21	6	8	27	33	0	5	23	9	48	17	1	10	0	2	29	29	2	1	91	3	5	1	0	4
20064	PRJEB27928	ERR2726468	4	16	2	6	48	18	26	5	40	164	21	2	81	9	24	1	0	45	7	61	6	9	17	4	8	20	34	0	7	23	9	49	21	0	10	0	5	32	30	1	2	99	4	5	2	0	5
20065	PRJEB27928	ERR2726469	5	12	2	6	42	21	28	2	42	165	21	1	81	8	23	1	1	49	6	65	5	7	23	6	9	27	36	0	6	18	13	49	18	0	9	0	4	28	36	1	1	99	4	5	1	1	8
20066	PRJEB27928	ERR2726470	6	13	2	5	41	20	30	3	39	154	22	1	78	9	25	0	1	44	5	60	6	7	21	2	9	21	28	0	8	19	12	45	16	1	12	0	5	29	27	1	1	101	3	5	1	2	6
20067	PRJEB27928	ERR2726471	11	30	4	11	93	43	57	11	75	294	50	2	141	25	52	2	6	84	7	55	6	10	26	14	28	50	78	1	6	31	30	87	36	1	33	0	2	46	71	1	10	190	8	9	1	5	2
20068	PRJEB27928	ERR2726472	11	24	1	13	78	37	40	9	65	206	37	3	107	15	47	0	3	71	8	54	6	12	16	4	26	37	54	3	5	31	31	64	29	0	18	1	1	37	62	2	4	107	6	6	1	3	4
20069	PRJEB27928	ERR2726473	8	20	1	7	64	34	48	4	56	188	31	2	106	17	37	2	5	56	7	53	6	5	20	8	15	32	47	1	6	20	17	58	28	2	20	0	0	35	51	2	6	121	3	6	2	3	1
20070	PRJEB27928	ERR2726474	12	27	3	7	102	47	67	11	78	269	44	3	155	21	49	1	4	74	9	67	11	9	22	5	21	40	68	1	8	29	19	82	31	0	25	1	5	55	66	4	3	168	5	7	2	2	3
20071	PRJEB27928	ERR2726475	15	30	1	15	79	43	45	11	52	205	29	2	104	22	45	1	4	56	7	58	2	7	22	14	22	33	52	2	6	21	19	71	31	2	21	0	0	40	51	4	4	98	3	10	4	5	2
20072	PRJEB27928	ERR2726476	4	12	0	5	43	26	26	3	28	121	29	1	66	10	20	1	2	32	6	36	3	4	7	4	11	19	29	1	2	17	15	39	26	0	11	0	1	29	33	1	5	64	2	3	0	0	1
20073	PRJEB27928	ERR2726477	3	12	0	5	41	20	24	3	30	124	27	1	70	8	23	1	2	31	2	45	4	4	6	4	9	14	25	0	3	19	15	31	23	0	7	0	0	23	33	1	5	60	2	3	0	2	1
20074	PRJEB27928	ERR2726478	4	10	1	4	46	22	25	3	28	117	28	2	72	11	19	2	1	37	2	41	2	4	5	3	9	13	29	1	3	19	12	29	20	0	10	0	0	23	34	2	4	56	2	3	0	1	0
20075	PRJEB27928	ERR2726479	2	11	0	5	42	21	25	4	26	112	21	1	67	9	21	0	2	32	4	39	2	5	6	4	8	16	28	1	4	17	14	29	21	0	10	0	0	21	31	1	4	53	3	3	0	0	1
20076	PRJEB27928	ERR2726480	4	14	3	4	43	20	29	2	35	154	19	1	64	11	20	2	3	32	8	50	4	8	15	6	8	22	27	3	5	13	12	41	18	1	5	0	1	19	30	1	1	83	2	6	2	3	3
20077	PRJEB27928	ERR2726481	5	18	4	10	39	20	25	4	39	154	20	3	58	8	17	3	3	37	9	41	6	7	18	7	7	21	26	2	8	15	14	45	18	0	4	0	0	22	26	1	1	87	0	7	0	3	3
20078	PRJEB27928	ERR2726482	4	11	2	5	40	21	27	4	36	149	17	2	69	12	18	2	2	34	6	49	7	7	19	2	4	23	21	2	7	10	13	40	18	1	4	0	0	21	28	1	2	95	2	2	2	2	4
20079	PRJEB27928	ERR2726483	4	15	2	9	38	19	26	5	36	147	21	1	65	14	15	1	3	34	5	60	4	8	16	4	6	19	23	2	7	12	11	44	16	1	2	1	1	22	23	1	2	86	1	5	0	2	2
20080	PRJEB27928	ERR2726484	11	18	3	7	56	26	33	6	44	180	25	3	94	18	33	4	4	48	7	47	7	9	20	10	13	26	52	0	3	17	19	58	26	0	20	1	1	24	38	2	9	111	4	8	1	5	0
20081	PRJEB27928	ERR2726485	12	31	2	11	73	38	46	7	69	247	41	4	119	18	47	2	6	73	11	68	8	10	30	8	21	51	57	2	8	33	25	80	30	2	20	0	2	41	51	1	2	152	5	9	4	1	5
20082	PRJEB27928	ERR2726486	10	44	8	15	108	51	63	4	105	359	48	1	145	25	63	7	4	93	7	94	22	8	32	10	23	52	91	3	8	39	32	97	32	3	35	2	3	54	69	3	11	215	6	4	3	6	5
20083	PRJEB27928	ERR2726487	8	15	2	8	40	23	37	4	39	147	26	7	75	13	32	3	3	47	3	45	1	8	20	6	12	21	40	1	3	19	11	51	22	4	10	0	1	28	38	2	3	79	5	6	4	4	0
20084	PRJEB27928	ERR2726488	12	14	3	11	56	35	35	6	50	169	20	5	93	16	42	0	2	57	7	42	3	5	18	5	17	35	52	2	4	18	25	51	20	2	12	0	1	32	43	1	1	103	7	9	0	1	2
20085	PRJEB27928	ERR2726489	6	14	1	6	34	14	20	3	30	106	12	3	54	11	19	3	2	38	7	38	0	1	15	6	8	18	36	1	1	8	12	36	9	2	6	0	1	19	19	0	2	80	0	3	4	4	1
20086	PRJEB27928	ERR2726490	7	11	2	7	36	13	18	3	26	85	13	4	46	13	17	1	1	37	9	37	0	0	14	7	8	22	36	1	3	6	12	32	7	3	11	0	1	20	17	1	0	73	0	3	3	2	2
20087	PRJEB27928	ERR2726491	6	14	0	5	27	14	20	4	28	101	11	2	46	14	22	0	2	42	7	51	0	2	13	8	10	19	38	2	1	9	11	31	7	3	9	0	2	20	23	1	1	83	0	5	3	4	1
20088	PRJEB27928	ERR2726492	6	8	3	5	28	12	21	3	23	91	10	1	51	14	19	0	2	39	5	42	0	1	14	6	7	22	33	2	2	7	9	31	5	2	7	0	1	21	20	0	1	72	0	5	2	2	1
100100	PRJEB7774	ERR688505	7	15	1	7	75	31	42	5	44	175	45	2	110	9	23	1	1	46	6	34	2	6	10	3	21	29	51	1	7	23	24	41	26	0	15	0	0	29	39	1	5	100	3	4	0	2	1
100101	PRJEB7774	ERR688506	9	19	4	5	104	46	66	2	67	283	57	1	151	11	43	2	1	88	8	60	5	10	15	4	24	40	71	1	6	24	36	49	47	2	24	1	1	34	70	1	7	177	6	4	1	2	2
100102	PRJEB7774	ERR688507	9	18	5	5	102	46	61	3	61	260	59	1	159	12	45	3	4	71	3	45	5	7	17	3	19	41	59	2	7	29	30	63	42	0	24	2	0	35	74	1	3	144	7	4	0	4	0
100103	PRJEB7774	ERR688509	4	15	1	2	81	35	55	2	49	214	50	1	112	8	31	1	2	65	6	46	5	4	4	2	14	30	50	0	7	22	19	35	35	0	19	0	0	29	48	0	2	104	4	1	0	0	1
100104	PRJEB7774	ERR688510	3	9	2	3	45	20	24	2	34	134	44	0	72	7	18	0	0	37	5	34	6	2	4	1	28	21	34	0	4	10	14	29	14	0	15	0	1	22	29	3	5	91	1	0	0	2	0
100105	PRJEB7774	ERR688511	2	10	2	1	61	24	35	0	33	164	41	0	95	5	23	1	1	46	4	31	3	5	3	3	13	27	40	2	3	18	15	26	26	0	16	2	3	21	41	4	7	81	1	0	0	2	0
100107	PRJEB7774	ERR688514	3	19	4	7	90	40	51	0	70	290	55	1	149	9	36	2	0	76	7	53	7	10	11	5	12	40	63	2	9	25	28	62	49	2	19	1	1	41	65	3	5	164	4	0	0	3	4
100108	PRJEB7774	ERR688515	5	18	4	6	84	44	49	5	80	330	47	3	137	11	45	3	1	90	4	72	18	13	19	5	17	46	76	3	7	36	28	59	44	1	33	1	2	45	58	4	8	179	7	1	1	8	4
100109	PRJEB7774	ERR688516	3	17	1	1	64	32	41	1	51	206	45	2	111	9	31	2	1	62	6	43	4	5	7	3	7	35	53	4	7	20	15	51	34	0	16	1	0	32	42	4	4	119	4	1	0	3	0
100110	PRJEB7774	ERR688517	3	24	5	6	63	24	36	2	66	279	34	2	87	12	25	4	3	71	8	63	19	17	19	9	13	35	58	1	2	22	26	49	30	2	26	2	3	32	48	3	6	163	4	1	1	7	8
100111	PRJEB7774	ERR688520	5	24	2	6	70	33	36	2	49	187	47	2	109	9	45	2	2	51	5	47	8	9	9	4	13	28	43	3	6	24	16	54	33	1	19	0	2	22	44	1	6	125	2	6	0	2	1
100112	PRJEB7774	ERR688521	2	13	2	3	74	32	45	0	50	183	40	0	116	9	30	1	1	48	3	39	5	6	3	0	22	30	46	1	2	14	23	31	30	1	14	0	3	26	43	1	7	97	2	0	0	2	2
100113	PRJEB7774	ERR688523	3	15	5	3	88	40	49	0	65	285	57	1	138	10	41	1	0	80	5	59	6	11	8	4	11	38	63	3	7	19	29	58	38	3	23	1	4	33	70	3	7	156	6	3	0	4	3
100114	PRJEB7774	ERR688525	5	18	4	3	87	35	52	0	68	286	53	2	138	2	39	1	1	88	7	59	8	9	9	4	21	38	65	2	7	24	24	49	37	3	20	2	4	37	59	4	7	160	4	1	1	4	5
100115	PRJEB7774	ERR688527	5	22	7	4	83	45	52	3	68	315	57	1	159	9	42	1	4	82	4	64	9	9	17	4	11	36	66	3	8	27	20	63	33	2	24	0	3	37	60	2	6	178	2	4	2	6	2
100116	PRJEB7774	ERR688528	6	20	0	8	102	37	63	3	80	323	62	2	145	13	48	1	2	90	5	73	15	14	14	5	19	55	86	1	9	27	29	68	46	1	18	0	1	50	77	4	4	169	8	5	3	3	2
100117	PRJEB7774	ERR688529	11	27	4	6	101	36	65	7	82	334	69	2	160	17	44	1	5	86	3	69	8	12	24	5	14	42	77	3	7	39	24	76	42	0	23	0	0	48	75	3	3	183	7	5	0	4	5
100118	PRJEB7774	ERR688530	2	15	1	2	77	39	46	3	57	223	55	0	135	11	40	3	1	64	1	61	7	7	8	3	13	33	58	0	7	23	15	55	34	4	23	2	0	28	63	3	6	124	2	1	0	2	1
100119	PRJEB7774	ERR688532	13	18	1	6	61	24	32	9	31	128	31	4	79	22	33	0	2	40	1	32	3	10	15	8	12	23	36	0	2	13	14	31	22	1	20	1	2	18	33	3	4	72	4	5	2	8	0
100120	PRJEB7774	ERR688563	4	13	6	3	52	20	31	2	32	156	41	3	63	11	18	0	0	38	5	40	2	7	6	2	13	23	39	0	4	10	27	33	20	0	23	0	3	18	37	1	5	82	3	1	0	5	0
100121	PRJEB10878	ERR1018193	14	15	0	13	59	21	31	8	36	118	16	3	69	17	42	0	2	38	8	28	5	2	23	11	28	25	44	1	2	26	23	46	17	4	15	0	1	24	34	4	2	82	12	10	1	2	4
100122	PRJEB10878	ERR1018194	18	21	2	11	83	32	48	13	54	218	43	10	111	24	62	1	3	55	5	43	4	12	23	14	26	44	55	2	6	21	21	63	27	2	24	0	1	37	58	3	9	138	8	8	4	12	2
100123	PRJEB10878	ERR1018195	13	12	1	8	56	24	32	7	30	133	25	2	68	17	31	2	3	38	4	26	5	3	8	4	15	17	36	2	5	19	13	40	25	3	13	0	0	25	37	1	4	85	1	5	0	4	1
100124	PRJEB10878	ERR1018196	9	18	3	6	77	32	46	5	55	225	46	3	115	14	40	1	2	64	4	50	7	9	14	6	17	34	57	2	6	23	22	53	31	2	21	1	2	32	55	3	5	130	5	4	1	5	2
100125	PRJEB10878	ERR1018197	16	17	3	17	71	36	41	16	51	212	31	2	101	23	46	1	5	58	7	37	7	2	27	7	18	33	65	1	6	23	22	65	30	0	21	0	1	31	45	4	6	119	7	10	2	4	4
100126	PRJEB10878	ERR1018198	19	23	4	9	110	41	56	9	67	272	53	4	117	18	57	4	4	65	6	46	1	17	19	13	32	40	69	3	15	25	38	79	33	2	53	1	2	51	63	8	14	140	11	6	1	12	3
100127	PRJEB10878	ERR1018199	11	12	1	7	35	16	21	5	21	106	16	3	46	12	23	4	0	23	3	23	2	3	11	3	13	19	28	2	5	9	12	31	18	0	11	1	1	14	25	0	2	51	3	3	3	3	3
100128	PRJEB10878	ERR1018200	8	18	3	3	75	33	42	3	47	244	49	2	120	11	39	6	0	52	7	43	4	4	10	7	25	32	55	1	7	11	33	42	32	1	39	1	0	30	56	1	8	129	0	1	1	4	1
100129	PRJEB10878	ERR1018201	11	12	5	7	55	29	33	5	41	191	27	6	86	11	32	2	2	43	5	29	6	6	13	11	18	25	50	1	5	13	24	47	25	2	22	2	0	31	38	4	7	96	8	5	1	4	2
100130	PRJEB10878	ERR1018202	12	12	1	10	51	22	24	5	30	115	22	4	65	14	32	1	2	35	5	23	3	8	20	12	17	22	43	0	4	13	20	42	17	0	11	1	1	29	36	6	3	81	6	5	1	2	3
100131	PRJEB10878	ERR1018203	15	17	2	13	73	30	35	12	41	176	28	6	91	23	46	4	2	46	8	25	4	6	23	14	23	31	54	3	5	11	24	57	26	2	19	1	0	34	42	4	6	93	4	8	2	4	7
100132	PRJEB10878	ERR1018204	12	2	1	5	32	12	12	4	17	98	19	5	32	8	28	0	0	17	7	16	2	7	11	8	11	12	19	1	2	9	10	24	14	0	22	1	1	20	19	6	8	45	5	2	2	5	0
100133	PRJEB10878	ERR1018205	16	18	1	12	57	26	37	6	37	139	24	1	78	20	38	1	1	39	3	32	6	4	13	6	17	24	48	3	3	13	17	52	29	2	25	0	0	27	43	3	8	91	8	7	1	6	4
100134	PRJEB10878	ERR1018206	2	8	1	2	36	18	26	2	21	92	26	0	55	6	13	3	0	25	6	22	1	5	3	2	8	15	20	1	3	10	16	30	17	0	12	0	0	18	24	1	6	56	2	0	0	1	1
100135	PRJEB10878	ERR1018207	16	12	2	12	59	27	36	13	37	146	24	3	63	21	41	0	0	42	10	31	3	9	20	12	32	26	42	3	5	15	27	58	23	2	22	0	2	31	34	2	4	86	9	8	5	2	3
100136	PRJEB10878	ERR1018208	5	12	0	2	34	11	19	0	24	95	16	2	49	4	11	0	0	26	4	26	4	4	7	3	1	15	20	0	3	11	8	21	16	0	12	1	1	19	22	2	5	62	3	2	0	2	1
100137	PRJEB10878	ERR1018209	17	21	3	13	61	29	32	9	44	164	23	4	93	21	49	2	2	47	4	33	3	5	18	12	18	29	48	2	4	24	16	58	20	2	21	0	0	35	42	2	7	115	7	7	2	8	4
100138	PRJEB10878	ERR1018210	17	16	5	12	57	32	36	8	38	206	25	8	97	19	48	2	1	45	10	29	5	9	24	11	29	27	47	2	7	19	24	60	26	3	36	1	2	33	49	5	12	117	7	8	1	12	2
100139	PRJEB10878	ERR1018211	11	24	3	10	73	32	44	5	63	263	38	2	116	19	37	4	4	73	8	71	5	8	28	13	14	44	57	3	6	18	26	53	30	0	22	1	3	44	43	6	9	143	5	6	2	5	1
100140	PRJEB10878	ERR1018212	15	28	8	11	88	43	54	7	60	307	40	4	123	24	54	3	6	75	8	64	5	6	20	15	28	39	60	7	4	25	34	69	39	3	29	0	2	48	77	4	9	193	8	5	2	8	11
100141	PRJEB10878	ERR1018213	4	12	1	3	47	24	29	4	36	160	42	2	85	7	25	0	1	39	4	51	3	3	8	4	12	30	43	0	7	14	14	26	17	0	21	1	0	18	38	1	8	85	3	1	0	5	0
100142	PRJEB10878	ERR1018214	12	22	1	12	45	19	22	9	30	127	14	4	50	17	42	2	2	40	7	23	2	5	16	11	16	19	35	3	3	13	13	53	21	1	21	0	2	23	30	4	4	77	3	7	2	8	5
100143	PRJEB10878	ERR1018215	9	14	0	9	97	41	58	5	57	216	57	3	150	10	44	1	1	57	5	35	4	9	13	6	30	41	71	2	4	18	34	46	40	0	31	0	2	37	65	3	10	126	9	1	2	5	1
100144	PRJEB10878	ERR1018216	15	16	3	14	77	37	47	9	51	204	34	3	97	21	43	5	4	53	9	38	3	7	23	14	25	34	59	3	6	22	25	61	30	1	34	1	3	24	57	1	14	113	4	10	1	8	2
100145	PRJEB10878	ERR1018217	10	10	1	2	97	41	52	1	52	197	53	3	119	11	52	0	1	66	3	42	7	9	8	7	19	35	53	2	13	17	31	41	31	0	28	2	3	33	60	4	7	136	7	1	3	6	2
100146	PRJEB10878	ERR1018218	17	20	2	16	69	35	38	9	50	185	27	4	107	13	44	7	3	47	5	24	6	9	20	13	23	28	51	2	4	22	26	51	33	1	18	0	0	33	49	3	4	111	6	8	4	3	1
100147	PRJEB10878	ERR1018219	14	14	2	6	51	23	28	6	31	162	31	7	62	13	33	1	0	37	7	24	4	6	15	11	19	19	42	1	2	13	20	40	16	0	26	1	2	28	33	5	13	78	10	4	1	3	5
100148	PRJEB10878	ERR1018220	15	20	3	14	102	41	56	11	69	250	39	9	126	20	59	5	4	76	7	50	8	7	29	9	26	39	72	3	8	25	23	89	36	0	38	1	1	44	63	5	10	148	10	9	3	2	8
100149	PRJEB10878	ERR1018221	16	41	9	13	82	50	51	6	65	315	35	3	111	19	59	1	6	91	9	61	4	11	36	24	34	47	76	5	8	30	25	69	44	2	43	0	5	46	78	6	10	169	7	7	4	9	5
100150	PRJEB10878	ERR1018222	14	31	4	15	67	32	41	10	56	209	24	6	103	21	43	1	3	65	10	53	7	6	34	11	18	39	59	2	6	25	25	76	30	4	21	0	3	34	49	2	3	171	6	9	5	6	5
100151	PRJEB7774	ERR688564	5	22	4	4	94	42	60	3	64	262	62	1	137	15	46	2	2	62	4	56	6	7	14	9	21	39	60	1	8	30	31	58	34	1	24	1	4	38	63	2	10	135	5	3	2	3	1
100152	PRJEB7774	ERR688565	7	28	5	12	115	50	67	3	91	348	67	3	174	18	53	6	3	105	7	84	14	11	25	9	16	55	85	2	5	29	36	77	44	2	37	1	3	53	77	3	9	208	5	2	0	8	3
100153	PRJEB7774	ERR688566	3	1	1	1	49	25	31	1	35	134	39	0	89	3	18	0	0	32	3	31	2	3	3	0	8	22	32	1	4	12	8	22	31	0	9	0	2	16	32	1	1	68	0	0	0	1	0
100154	PRJEB7774	ERR688567	8	21	5	13	68	24	38	5	53	233	36	4	95	14	36	2	3	60	6	67	2	8	22	8	16	33	57	3	3	18	18	53	29	2	22	2	1	30	52	2	8	146	7	4	1	6	1
100155	PRJEB7774	ERR688568	3	7	5	0	52	21	34	1	28	137	33	1	77	4	20	2	0	41	2	34	2	3	3	0	14	25	38	1	3	9	13	19	17	0	12	0	1	21	37	0	2	67	1	1	0	0	0
100156	PRJEB7774	ERR688569	8	28	7	10	81	34	45	3	62	292	40	5	114	14	53	4	2	83	8	58	10	7	20	11	17	34	67	3	5	26	19	63	39	2	27	0	3	33	51	4	6	190	9	2	2	9	6
100157	PRJEB7774	ERR688570	13	17	2	8	72	34	40	3	51	183	45	6	98	16	32	4	3	60	9	41	2	9	17	6	15	33	46	2	6	21	23	49	27	2	21	0	3	29	50	2	7	112	4	4	1	1	3
100158	PRJEB7774	ERR688571	3	4	1	0	45	21	24	0	25	91	33	0	65	5	17	0	0	30	4	19	4	7	3	0	15	17	24	0	7	7	18	17	15	0	14	1	1	13	28	0	4	62	1	0	0	2	0
100159	PRJEB7774	ERR688572	1	9	2	0	63	29	40	0	42	178	36	1	113	6	33	1	1	48	6	30	4	5	6	0	12	23	45	0	9	18	15	40	29	0	18	0	1	24	49	2	6	90	2	0	0	2	0
100160	PRJEB7774	ERR688573	8	18	2	6	75	31	42	9	57	209	34	5	105	16	39	3	4	63	4	50	2	4	21	9	18	33	48	0	4	18	18	57	31	2	26	0	1	37	54	3	7	130	6	7	0	2	1
100161	PRJEB7774	ERR688574	9	23	6	10	96	32	59	3	71	291	49	2	124	19	35	2	0	77	6	71	10	7	17	4	21	45	75	1	6	17	23	71	28	1	32	0	0	41	69	5	7	168	4	6	3	5	4
100162	PRJEB7774	ERR688575	14	25	2	16	88	47	52	12	73	279	43	3	144	25	53	4	6	81	10	54	11	5	30	10	24	46	71	2	5	35	29	73	28	2	19	0	2	47	61	1	5	169	9	12	5	2	5
100163	PRJEB7774	ERR688576	9	18	2	13	103	53	64	6	83	319	57	3	171	14	54	2	5	87	9	63	7	8	19	10	27	53	84	3	5	39	34	79	48	1	25	0	2	54	77	4	6	188	6	5	1	5	2
100164	PRJEB7774	ERR688577	16	36	3	12	110	39	60	14	65	264	41	6	123	36	73	2	6	70	7	54	1	8	32	20	31	43	67	2	6	25	24	79	43	3	35	1	2	44	65	3	8	153	5	12	6	9	5
100165	PRJEB7774	ERR688578	14	25	3	17	88	43	52	11	61	224	39	4	129	20	46	0	3	71	8	52	6	6	23	14	22	34	63	1	4	26	30	64	37	3	23	0	0	33	60	2	8	142	6	9	3	3	0
100166	PRJEB7774	ERR688579	14	27	6	19	100	40	55	6	80	280	42	3	139	21	52	6	6	83	8	54	10	7	30	9	16	43	69	1	7	30	22	76	35	1	21	2	1	39	74	1	1	183	5	10	2	3	1
100167	PRJEB7774	ERR688580	3	12	5	4	69	27	39	1	51	185	45	1	100	11	23	2	0	58	7	47	8	5	9	9	12	30	49	1	2	14	20	41	26	1	22	2	2	28	46	3	8	94	3	3	0	4	1
100171	PRJEB7774	ERR688590	11	23	4	12	81	45	56	6	71	278	52	2	146	22	57	3	5	76	4	65	2	7	25	6	29	44	67	1	5	31	31	75	30	1	27	1	3	44	72	1	5	174	4	9	1	8	0
100172	PRJEB7774	ERR688591	1	12	2	0	49	23	31	0	29	124	32	1	77	5	16	2	0	32	3	21	4	3	2	2	13	18	31	0	3	8	13	16	19	0	10	0	0	16	34	0	6	66	0	0	0	3	0
100173	PRJEB7774	ERR688593	4	22	1	5	92	40	55	1	65	289	52	1	141	16	41	3	3	72	9	50	10	10	14	8	18	40	59	2	8	27	28	58	38	1	21	1	2	37	75	2	4	168	5	2	1	5	3
100174	PRJEB7774	ERR688594	0	6	3	0	33	15	18	0	18	103	19	1	53	5	10	1	1	23	6	22	1	4	4	0	9	17	26	0	5	9	8	20	15	0	7	0	1	7	22	1	0	46	0	0	0	3	0
100175	PRJEB7774	ERR688595	9	14	1	4	54	26	40	1	45	205	40	1	97	7	31	0	0	53	6	37	3	7	10	3	10	29	44	1	6	17	21	39	26	0	21	1	1	27	41	3	8	103	4	4	1	1	0
100176	PRJEB7774	ERR688596	5	14	4	6	79	34	42	3	49	223	47	1	128	12	32	0	2	57	6	54	4	6	13	3	9	31	52	0	5	28	15	48	32	1	22	1	0	22	51	1	5	135	2	4	0	5	0
100179	PRJEB7774	ERR688600	9	17	6	5	65	25	36	1	45	197	42	4	103	7	35	1	1	58	5	47	6	8	12	8	14	24	42	0	5	12	16	34	21	0	16	1	3	30	46	1	4	121	7	0	0	6	4
100182	PRJNA447983	SRR6915108	5	20	0	7	63	30	40	5	44	157	33	1	101	11	27	0	3	41	3	38	5	3	15	2	21	29	39	1	4	25	21	31	29	0	8	0	1	21	52	1	6	78	5	6	0	1	1
100183	PRJNA447983	SRR6915109	11	16	8	13	94	40	61	10	63	248	46	2	143	19	48	1	6	69	10	50	6	7	26	9	28	42	63	1	6	22	20	65	37	1	23	2	1	38	69	2	11	145	11	6	4	10	2
100184	PRJNA447983	SRR6915110	7	21	2	7	53	23	37	5	40	150	25	2	79	18	32	1	2	39	4	31	5	3	15	4	14	31	40	1	1	13	19	48	31	1	20	0	0	20	37	0	3	78	3	9	0	1	4
100185	PRJNA447983	SRR6915111	8	9	1	4	49	21	29	3	25	109	22	2	78	12	16	1	1	31	6	26	2	5	10	7	17	16	40	0	4	12	16	25	16	1	20	0	1	9	28	1	6	63	0	2	2	7	3
100186	PRJNA447983	SRR6915112	6	15	1	7	83	32	55	3	57	211	42	2	119	11	31	4	3	57	5	48	9	6	16	4	21	32	58	1	8	29	22	44	37	0	20	0	0	27	59	3	6	102	3	3	1	3	3
100188	PRJNA447983	SRR6915114	8	16	2	8	64	35	39	6	42	167	27	1	80	14	31	2	1	38	8	37	3	9	13	11	19	32	50	1	5	11	22	41	25	2	15	1	2	27	45	0	3	86	7	5	2	2	1
100189	PRJNA447983	SRR6915115	7	14	0	5	22	8	11	7	20	69	3	1	23	15	32	1	2	19	6	36	1	7	16	8	12	10	22	0	1	4	5	30	12	2	16	0	1	12	15	1	2	44	5	4	2	4	5
100190	PRJNA447983	SRR6915116	11	18	3	16	58	34	35	6	51	206	25	1	88	18	40	3	3	59	5	68	1	9	28	8	12	30	45	0	3	18	24	58	20	5	9	1	0	29	47	2	1	122	1	8	1	4	4
100191	PRJNA447983	SRR6915117	8	14	1	9	97	39	55	6	58	243	50	2	140	7	41	2	4	64	4	49	6	8	13	3	21	32	55	4	6	27	20	53	43	1	18	1	3	30	65	0	7	128	4	3	1	2	1
100192	PRJNA447983	SRR6915119	5	17	2	7	29	17	18	5	25	90	8	3	39	9	21	0	3	28	8	28	1	2	13	7	9	11	21	3	4	8	12	31	14	0	8	0	2	11	27	1	2	66	3	4	1	4	1
100193	PRJNA447983	SRR6915120	10	16	0	13	36	21	23	12	26	90	7	3	40	22	33	3	4	32	6	31	2	1	24	11	15	16	30	0	2	8	12	45	10	4	6	0	1	17	32	3	0	65	2	9	4	1	5
100194	PRJNA447983	SRR6915121	14	26	2	15	91	45	48	13	63	243	27	1	102	32	50	4	8	59	4	62	5	6	30	11	16	32	59	6	8	28	25	84	36	1	19	0	2	42	63	6	5	148	2	10	3	6	3
100196	PRJNA447983	SRR6915123	10	21	3	10	49	21	24	5	31	132	13	4	61	16	33	1	6	35	12	43	1	8	28	12	10	23	33	2	3	16	14	40	19	1	9	1	1	25	33	2	1	90	5	6	2	4	1
100197	PRJNA447983	SRR6915125	8	13	5	5	74	32	42	4	44	183	34	6	95	17	41	6	2	49	6	45	8	5	16	15	27	31	48	0	3	26	22	48	27	2	30	1	1	28	47	3	6	128	6	6	1	9	2
100198	PRJNA447983	SRR6915126	17	32	2	14	99	44	53	12	57	243	41	5	119	21	54	2	4	61	5	57	4	9	32	11	28	35	74	3	10	20	25	75	39	3	32	2	2	30	61	1	6	171	10	11	2	10	2
100199	PRJNA447983	SRR6915127	7	19	7	7	81	40	53	6	60	233	38	3	114	17	48	1	3	73	8	64	12	5	24	13	26	45	57	1	6	22	28	53	28	2	25	0	5	32	59	3	6	144	2	6	4	8	6
100200	PRJNA447983	SRR6915128	4	18	2	8	54	31	33	6	53	179	28	0	93	17	36	0	0	58	9	66	4	8	21	3	21	27	56	2	5	20	32	62	23	2	16	1	1	23	55	1	9	93	3	3	2	1	7
100203	PRJNA447983	SRR6915131	11	24	3	15	120	48	76	9	82	310	58	3	184	26	51	3	5	88	10	58	9	7	24	11	28	59	85	5	8	39	37	72	50	1	35	2	3	44	92	2	9	172	9	8	3	7	1
100204	PRJNA447983	SRR6915132	8	26	2	11	75	36	47	8	62	239	36	4	98	18	38	4	4	68	9	74	8	10	32	11	26	37	57	3	5	29	22	62	32	2	29	4	1	36	51	2	8	152	5	8	1	9	6
100207	PRJNA447983	SRR6915135	9	15	1	7	61	26	33	3	42	181	30	1	83	10	31	2	2	50	6	60	5	5	17	8	22	28	40	1	3	20	19	37	23	4	11	1	0	24	47	2	5	112	3	5	2	5	5
100208	PRJNA447983	SRR6915136	7	21	1	6	72	35	46	1	59	236	46	0	116	11	38	0	1	63	5	62	7	7	10	4	11	40	49	2	7	23	22	47	38	0	18	1	6	35	57	3	2	126	4	2	0	6	3
100210	PRJNA447983	SRR6915144	10	23	2	12	53	32	30	12	40	159	13	1	65	15	32	1	6	45	3	49	7	4	24	7	8	24	37	4	4	24	9	63	21	1	9	1	4	24	36	4	3	120	5	9	3	5	4
100211	PRJEB10878	ERR1018223	11	21	2	7	67	29	38	4	56	249	41	2	105	15	40	2	6	73	7	53	9	6	23	12	15	36	56	1	5	27	21	72	21	2	23	1	5	44	56	6	5	159	5	6	0	5	6
100212	PRJEB10878	ERR1018224	9	18	1	9	56	29	31	3	28	144	25	3	85	7	29	1	0	36	4	23	2	5	11	7	17	23	44	2	9	16	24	33	19	0	17	2	1	20	37	2	11	70	5	4	2	4	2
100213	PRJEB10878	ERR1018225	3	22	0	10	55	27	35	6	47	167	18	0	82	21	32	0	2	55	9	42	5	9	16	2	12	26	46	2	5	18	24	57	17	1	12	1	0	24	45	0	3	93	2	6	1	4	9
100214	PRJEB10878	ERR1018226	9	22	0	9	71	43	45	7	59	247	43	3	112	12	38	4	1	66	6	45	8	11	19	8	22	38	63	4	8	33	23	62	33	1	34	3	1	39	54	6	12	132	5	7	1	2	1
100215	PRJEB10878	ERR1018227	16	19	3	10	77	34	44	5	44	207	28	5	114	15	50	1	1	60	6	39	3	13	19	11	27	36	63	4	6	25	30	60	35	0	25	2	2	45	59	4	9	113	12	6	3	6	6
100216	PRJEB10878	ERR1018228	14	28	2	12	88	39	53	5	60	233	44	2	110	17	45	3	1	66	10	43	9	9	14	8	24	28	58	3	7	33	24	63	39	2	28	0	2	36	61	1	7	153	3	4	3	4	9
100217	PRJEB10878	ERR1018229	3	13	2	6	70	34	43	3	50	193	46	1	115	9	28	3	1	64	8	47	2	11	5	1	21	31	47	3	10	22	21	55	40	0	31	0	2	34	47	5	12	95	3	2	0	4	2
100218	PRJEB10878	ERR1018230	14	33	6	10	78	35	46	5	56	255	32	3	106	17	43	3	6	77	3	66	6	7	29	17	19	36	59	3	7	30	29	69	36	2	28	2	1	39	59	5	3	155	9	8	3	5	4
100220	PRJEB10878	ERR1018232	8	23	2	9	105	41	55	3	78	312	59	4	161	14	53	3	3	88	5	51	11	13	20	9	20	51	72	4	9	31	37	74	36	0	34	3	4	58	82	4	10	161	12	2	3	3	4
100221	PRJEB10878	ERR1018233	19	21	2	11	57	28	28	9	37	147	28	3	80	16	38	0	0	40	5	36	5	8	12	10	25	28	47	0	2	12	15	48	21	1	15	0	0	28	35	0	8	90	2	5	2	3	2
100222	PRJEB10878	ERR1018234	10	22	2	9	71	34	41	5	51	212	35	2	104	14	39	2	2	61	6	46	6	9	17	8	18	33	53	3	7	25	23	59	30	1	23	1	2	36	52	3	7	122	6	5	2	4	4
100223	PRJEB10878	ERR1018235	11	18	2	15	93	43	62	8	65	283	44	6	145	18	42	1	4	71	5	33	9	11	23	8	30	41	84	2	9	30	31	67	41	0	27	0	1	44	68	3	10	149	6	7	2	1	1
100224	PRJEB10878	ERR1018236	13	28	1	13	63	30	40	6	42	145	22	7	94	19	37	1	2	48	7	31	3	5	19	10	19	29	44	3	5	24	18	50	23	1	16	0	0	30	44	2	4	101	7	5	2	4	1
100225	PRJEB10878	ERR1018237	11	6	2	4	43	18	24	3	23	138	31	3	61	6	24	2	1	29	7	28	6	7	8	12	12	20	37	1	4	15	16	32	19	1	25	0	1	22	28	6	9	75	6	1	0	7	1
100226	PRJEB10878	ERR1018238	10	11	4	6	79	32	44	3	44	188	46	3	102	13	38	1	1	46	4	36	4	9	8	9	24	25	48	1	9	24	23	50	33	1	35	1	0	34	49	8	15	110	5	1	0	5	3
100227	PRJEB10878	ERR1018239	12	25	6	10	87	39	58	6	63	241	43	5	121	18	47	4	3	69	6	50	3	6	21	10	15	40	56	2	5	28	29	62	40	2	26	2	0	37	62	7	7	146	7	6	1	6	2
100228	PRJEB10878	ERR1018240	12	22	2	10	85	33	49	6	63	238	47	6	125	18	60	3	4	75	4	58	9	8	16	9	23	43	67	2	5	29	31	70	31	2	19	1	0	42	61	5	8	139	5	4	3	3	2
100229	PRJEB10878	ERR1018241	17	21	1	11	64	30	33	14	48	191	31	4	98	18	47	4	0	49	7	34	5	10	18	21	28	27	62	5	5	21	24	61	30	1	37	0	0	31	43	8	11	104	10	4	2	8	5
100230	PRJEB10878	ERR1018242	13	17	0	7	64	28	39	7	42	172	34	3	103	15	35	1	2	49	5	23	3	8	15	10	20	24	56	1	6	20	12	51	28	0	21	1	1	38	51	4	9	107	6	5	2	1	2
100231	PRJEB10878	ERR1018246	7	10	2	6	81	39	50	7	51	216	42	4	130	14	42	3	2	63	4	38	8	11	16	5	17	32	67	1	4	22	23	52	34	1	22	1	3	35	56	5	7	117	6	4	0	3	5
100232	PRJEB10878	ERR1018247	14	24	0	13	66	28	35	6	55	213	24	5	105	18	47	3	5	63	4	51	7	9	27	13	20	27	66	0	1	21	20	61	30	1	24	0	2	38	50	4	4	155	10	4	1	3	2
100233	PRJEB10878	ERR1018248	7	20	2	9	70	27	39	2	51	231	43	1	109	14	33	0	3	73	6	47	6	7	22	6	15	33	55	2	4	21	20	56	26	2	22	1	1	40	60	5	7	106	7	6	1	9	3
100234	PRJEB10878	ERR1018249	11	21	2	13	51	22	31	6	43	136	19	3	81	9	32	1	3	51	4	43	6	3	13	3	19	29	41	0	5	14	8	39	19	0	10	0	2	31	37	1	0	66	4	6	0	2	1
100235	PRJEB10878	ERR1018250	10	11	5	5	57	31	33	6	47	179	38	3	97	10	35	2	3	48	6	44	3	6	11	4	23	34	51	2	7	16	26	49	26	1	20	0	2	30	45	5	8	100	4	5	1	5	0
100236	PRJEB10878	ERR1018251	17	21	2	13	74	31	40	10	41	185	28	4	93	15	49	2	1	50	5	38	6	7	17	6	23	35	54	1	5	19	22	48	27	0	29	0	1	36	51	1	4	107	11	6	4	5	3
100237	PRJEB10878	ERR1018252	2	21	1	3	57	29	32	3	39	156	33	1	84	7	29	0	3	49	9	34	6	6	5	4	11	24	43	2	6	21	17	46	27	0	19	0	0	28	46	1	9	104	5	1	2	3	2
100238	PRJEB10878	ERR1018253	14	17	1	4	71	27	41	7	57	205	35	2	115	14	38	1	4	64	7	49	6	7	18	9	11	37	58	2	4	23	21	47	29	0	24	0	4	35	50	4	8	122	7	3	0	4	2
100239	PRJEB10878	ERR1018254	13	29	5	12	79	41	51	8	67	282	45	1	139	18	42	2	4	80	11	69	10	7	29	9	19	42	61	2	6	25	28	66	31	1	21	2	0	46	58	3	16	156	6	6	5	5	3
100241	PRJEB10878	ERR1018256	4	11	2	8	65	25	41	3	50	191	41	2	101	9	30	0	3	54	5	46	4	4	8	5	14	35	48	2	4	16	27	53	27	0	20	0	1	30	45	6	4	98	2	2	1	3	3
100242	PRJEB10878	ERR1018257	10	20	2	8	77	38	55	2	73	304	60	2	155	11	38	2	2	73	6	37	6	8	20	8	21	40	68	1	6	23	29	56	31	0	25	1	5	46	66	6	11	175	6	2	1	3	2
100243	PRJEB10878	ERR1018258	21	23	1	14	67	35	40	12	43	149	22	3	90	22	45	2	1	52	7	38	8	5	21	22	27	32	56	2	3	19	25	56	26	1	22	0	2	23	47	4	7	102	7	8	7	6	1
100244	PRJEB10878	ERR1018259	13	28	2	15	92	32	42	5	60	229	41	5	127	17	54	1	2	67	11	31	5	13	15	13	29	39	70	3	5	22	31	54	33	1	15	1	3	47	57	6	4	143	13	7	2	4	2
100245	PRJEB10878	ERR1018260	11	26	3	14	43	19	23	8	33	99	11	4	69	15	36	0	2	31	4	24	3	5	19	12	18	21	41	1	4	13	11	45	15	2	15	0	0	22	33	1	3	60	8	8	3	1	3
100246	PRJEB10878	ERR1018261	8	8	3	5	54	24	35	3	39	126	31	1	81	9	23	6	1	43	3	30	2	6	11	5	8	30	46	2	4	21	24	35	26	0	23	2	1	20	41	3	10	72	3	2	2	3	1
100247	PRJEB10878	ERR1018262	13	32	0	9	94	34	55	8	70	275	52	2	132	20	61	2	2	93	3	50	10	4	25	5	17	39	76	1	6	18	30	75	32	1	23	2	1	42	68	2	9	137	11	7	3	7	2
100248	PRJEB10878	ERR1018263	13	16	1	7	81	38	50	6	46	185	47	4	107	17	52	3	1	52	4	35	6	8	6	3	22	33	57	3	5	16	24	56	33	0	29	1	0	33	48	3	4	116	8	3	1	3	3
100249	PRJEB10878	ERR1018264	14	24	0	12	75	36	52	9	47	210	49	3	116	21	45	1	2	60	3	47	6	4	15	11	20	31	53	2	8	23	27	44	34	0	25	0	0	33	48	4	9	122	10	6	2	8	2
100250	PRJEB10878	ERR1018265	17	27	3	21	90	30	43	10	50	225	33	8	121	26	56	3	6	66	4	52	6	8	37	10	27	47	65	1	7	30	31	70	29	2	23	1	0	40	50	4	3	132	8	13	5	5	5
100251	PRJEB10878	ERR1018266	12	25	5	11	89	39	54	9	69	261	27	3	121	21	53	4	6	74	4	60	13	7	25	11	22	40	61	2	6	25	28	68	42	3	20	1	3	40	51	2	4	165	5	7	2	6	5
100252	PRJEB10878	ERR1018267	11	23	4	16	69	34	44	9	61	247	26	3	110	26	48	2	2	79	7	44	7	6	23	5	18	42	67	3	5	21	31	58	26	0	9	0	3	41	48	6	2	144	3	7	3	2	2
100253	PRJEB10878	ERR1018268	14	31	4	17	85	41	48	7	69	291	35	2	130	20	44	5	4	87	6	64	10	11	28	9	24	48	67	3	5	28	39	71	35	2	17	1	3	40	61	3	3	178	5	9	3	4	8
100254	PRJEB10878	ERR1018269	12	18	2	9	67	34	44	8	46	197	30	2	120	14	45	0	2	52	10	18	4	6	19	8	21	33	55	0	6	20	18	53	32	0	24	1	2	33	48	3	8	121	4	6	1	2	3
100255	PRJEB10878	ERR1018270	10	17	1	7	69	33	39	5	44	194	35	1	104	12	50	0	1	49	6	30	10	3	10	6	17	28	49	2	5	27	20	48	33	1	15	1	1	35	48	1	2	119	4	3	1	2	5
100256	PRJEB10878	ERR1018271	7	17	3	5	43	21	27	3	42	135	21	2	57	6	28	0	4	40	2	44	2	11	9	7	16	23	38	0	3	11	19	35	23	0	21	1	0	26	44	5	6	91	6	1	0	5	3
100257	PRJEB10878	ERR1018272	22	32	3	20	84	40	53	9	67	277	35	6	128	25	57	2	4	79	4	51	7	9	26	13	23	40	76	3	4	30	29	71	39	2	23	1	1	47	54	3	3	164	7	12	3	4	3
100258	PRJEB10878	ERR1018273	10	27	1	12	63	41	43	3	74	273	35	3	127	14	38	2	3	81	6	43	13	9	20	6	22	44	79	2	9	22	29	72	32	1	22	0	5	46	61	6	5	180	9	5	3	2	2
100259	PRJEB10878	ERR1018274	15	26	1	12	79	38	43	10	61	244	32	2	146	22	56	0	2	71	4	41	8	8	21	11	32	39	72	2	4	23	24	66	35	1	17	0	3	37	66	3	4	161	11	13	4	1	2
100260	PRJEB10878	ERR1018275	8	14	3	7	52	19	24	4	48	178	28	3	103	13	28	2	1	48	3	30	5	5	17	6	13	23	41	1	4	16	15	34	18	0	10	0	1	26	42	1	2	99	3	2	4	0	2
100261	PRJEB10878	ERR1018276	13	21	0	11	57	22	35	6	42	162	20	3	82	13	46	1	2	43	5	30	7	2	17	7	21	27	40	1	3	15	18	51	22	2	10	0	1	31	39	2	0	91	6	7	5	0	2
100262	PRJEB10878	ERR1018277	13	25	1	7	84	41	56	7	64	235	50	5	150	17	49	5	2	67	7	36	6	10	14	5	26	41	74	5	13	28	29	66	39	1	34	2	0	47	62	5	8	139	2	5	5	8	3
200183	PRJNA397112	SRR8865580	7	21	3	2	28	13	19	4	32	106	5	0	44	12	23	3	0	39	4	63	4	11	27	6	8	17	38	0	2	3	12	37	12	2	6	2	1	18	23	2	2	50	5	2	3	4	3
200184	PRJNA397112	SRR5898982	1	5	1	6	8	5	11	0	19	30	2	0	14	7	11	0	0	11	1	34	0	1	7	0	3	6	16	0	0	2	7	14	3	0	0	0	0	3	14	0	0	15	0	0	1	1	1
200185	PRJNA397112	SRR5898985	3	13	0	5	10	4	8	1	14	61	4	0	28	6	10	2	0	17	4	39	1	1	4	1	4	11	14	0	1	4	8	15	1	0	1	0	1	9	21	0	0	22	0	0	0	0	0
200186	PRJNA397112	SRR8865577	2	12	1	0	20	9	16	2	27	83	5	2	33	6	17	2	0	30	5	48	3	7	17	1	1	6	25	0	3	2	10	16	11	1	8	0	0	10	11	2	1	44	3	2	1	2	1
200187	PRJNA397112	SRR8865593	1	6	2	2	19	14	14	0	22	93	9	1	26	8	11	1	2	29	4	41	4	1	8	1	3	14	17	1	3	4	12	24	8	0	4	0	2	15	19	1	0	64	2	1	1	4	1
200188	PRJNA397112	SRR8865575	7	16	1	11	24	10	14	5	15	53	0	1	26	15	27	2	1	18	3	40	3	3	13	6	10	14	20	1	1	7	4	24	8	0	5	0	0	10	17	1	2	33	3	5	2	0	1
200189	PRJNA397112	SRR8865594	12	6	0	4	42	11	16	2	16	61	17	7	36	10	25	2	1	16	4	20	0	13	9	10	4	15	17	1	0	12	14	18	12	1	13	2	2	17	20	2	8	51	7	0	4	5	0
200190	PRJNA397112	SRR8865573	7	18	0	10	23	13	15	9	25	82	1	3	35	16	25	5	1	29	2	59	5	9	25	2	7	11	28	0	1	7	9	34	8	1	5	1	1	12	17	0	1	51	3	3	6	0	4
200191	PRJNA397112	SRR8865579	12	18	2	11	26	17	21	7	29	81	6	2	38	21	28	3	1	34	3	50	2	5	19	6	9	16	32	0	1	4	13	41	5	1	4	0	0	13	21	1	1	43	5	6	2	2	2
200192	PRJNA397112	SRR8865586	3	12	0	4	32	10	12	0	16	59	7	3	21	7	23	0	0	21	3	33	0	12	5	6	3	11	17	0	0	4	15	15	8	0	10	0	2	13	13	3	4	35	4	0	0	4	1
200193	PRJNA397112	SRR8865597	0	1	0	1	7	4	4	0	7	38	1	0	14	4	2	0	1	13	4	36	3	3	9	2	4	5	6	0	0	4	2	8	5	0	3	1	1	3	4	1	0	25	3	0	0	1	3
200194	PRJNA397112	SRR8865600	4	4	1	4	17	3	10	2	13	37	5	1	19	6	12	5	1	18	7	30	1	3	14	3	3	8	9	0	1	1	3	23	1	1	3	1	1	7	5	1	2	43	2	4	1	2	1
200195	PRJNA397112	SRR5898987	4	6	1	3	12	7	10	1	17	53	1	1	12	4	9	1	0	20	3	40	0	4	8	4	2	10	16	0	1	4	2	19	4	0	2	0	2	6	17	1	0	35	1	0	2	3	0
200196	PRJNA397112	SRR5898983	2	6	0	0	18	7	6	0	7	24	6	2	12	3	5	1	0	7	3	27	0	2	1	1	4	3	6	1	0	5	3	10	3	0	4	0	0	6	4	1	1	11	1	1	1	1	0
200197	PRJNA397112	SRR5898921	2	18	1	5	21	8	11	0	22	60	6	1	38	12	19	1	2	27	8	59	1	4	9	3	2	15	18	0	1	4	5	28	2	0	9	3	1	11	22	1	3	35	3	2	0	4	1
200198	PRJNA397112	SRR8865591	4	11	2	3	17	7	9	4	9	37	1	3	22	8	18	2	1	13	3	31	1	2	10	4	8	7	15	0	0	3	1	21	3	0	1	0	1	6	12	0	0	28	2	6	1	2	1
200199	PRJNA397112	SRR5898978	4	6	0	4	30	6	10	2	11	40	7	2	16	8	16	0	0	12	1	22	0	4	6	3	3	9	11	1	1	3	6	22	4	0	8	0	1	9	15	2	2	19	3	0	0	2	1
200200	PRJNA397112	SRR8865574	8	13	0	8	24	10	11	6	12	36	0	2	25	11	24	1	1	15	4	31	1	3	12	5	9	16	20	0	0	6	4	26	6	1	5	0	0	4	14	0	1	32	3	4	5	1	0
200201	PRJNA397112	SRR5898979	0	9	1	2	9	8	9	1	10	29	4	0	15	5	10	0	1	10	1	33	0	3	2	0	1	8	6	1	1	3	8	19	2	0	1	0	0	5	14	0	0	20	0	0	0	0	1
200202	PRJNA397112	SRR8865578	6	11	2	4	21	8	15	4	23	63	2	1	26	13	24	1	1	27	5	48	2	6	25	5	8	15	18	0	2	4	6	27	6	0	6	0	2	14	15	1	1	44	4	3	2	2	2
200203	PRJNA397112	SRR8865581	10	17	2	10	25	15	20	5	32	79	1	2	35	24	28	5	1	27	3	44	2	5	25	3	10	16	35	0	0	7	9	44	10	2	5	0	1	15	20	1	2	50	3	4	3	2	3
200204	PRJNA397112	SRR8865598	15	26	1	12	64	29	42	9	44	173	20	8	68	29	55	5	3	48	4	60	3	17	25	16	15	31	44	1	2	17	31	61	23	0	27	1	2	41	52	4	13	114	22	9	3	9	1
200205	PRJNA397112	SRR8865583	3	9	1	3	18	9	12	5	22	67	2	1	30	17	14	2	1	22	3	49	2	7	21	2	4	8	29	1	1	4	5	22	6	3	2	2	2	9	11	0	0	33	3	0	1	1	4
200206	PRJNA397112	SRR8865601	4	5	1	3	40	10	13	2	15	68	13	2	21	10	22	1	0	14	2	26	1	6	7	3	7	11	15	0	2	8	8	25	9	0	10	1	0	18	21	2	3	32	3	1	3	2	1
200207	PRJNA397112	SRR8865572	0	9	4	11	19	10	15	1	19	62	5	0	26	10	17	3	1	27	6	48	3	2	11	2	9	13	22	0	0	4	7	28	5	0	4	0	1	6	16	1	2	42	0	1	2	1	2
200208	PRJNA397112	SRR8865595	7	13	0	9	28	11	19	7	18	52	5	5	25	16	31	1	0	18	3	31	2	4	14	7	10	17	21	0	0	7	10	28	7	2	7	0	1	9	18	1	1	38	4	6	2	1	0
200209	PRJNA397112	SRR8865587	3	4	0	3	8	3	4	0	6	19	3	1	9	7	3	0	0	7	2	13	0	1	3	3	1	6	6	0	0	2	3	3	4	0	4	0	0	3	2	1	2	7	2	0	1	2	0
200210	PRJNA397112	SRR5898981	2	5	0	3	10	6	10	0	11	39	3	0	24	5	11	3	0	11	3	27	0	1	6	0	3	6	13	0	0	2	4	11	2	0	2	0	0	7	13	1	0	17	1	0	1	2	0
200211	PRJNA397112	SRR5898923	8	11	0	5	17	10	14	2	16	47	4	0	31	13	15	2	1	18	2	34	2	2	12	0	4	9	21	0	1	5	13	23	5	1	1	0	0	5	16	0	2	25	0	2	3	1	1
200212	PRJNA397112	SRR5898925	3	9	0	5	3	5	2	1	8	25	0	0	12	8	9	2	0	9	0	19	0	2	8	0	3	7	9	0	1	2	9	15	0	0	0	0	0	1	6	0	0	13	0	0	0	0	0
200213	PRJNA397112	SRR8865592	2	8	2	3	12	5	7	1	9	21	1	2	9	5	8	0	1	9	2	34	0	2	12	1	4	8	14	0	0	2	2	11	3	0	3	0	0	4	16	1	0	22	1	1	1	1	2
200214	PRJNA397112	SRR5898986	0	5	0	2	15	4	5	1	11	34	4	0	14	5	7	2	1	9	2	27	0	2	3	0	1	4	7	1	2	4	8	19	4	0	2	0	0	6	10	0	0	16	0	0	0	0	1
200215	PRJNA397112	SRR8865599	8	7	0	1	30	13	15	0	12	56	16	3	28	10	19	4	0	19	2	35	0	5	5	4	5	13	12	1	3	6	12	21	7	0	12	3	0	16	22	3	7	50	3	1	1	10	0
200216	PRJNA397112	SRR8865584	0	8	0	3	18	6	12	0	22	63	5	0	21	6	10	1	0	24	4	48	1	3	6	0	2	9	16	1	1	10	11	21	3	0	8	0	3	9	10	1	1	41	3	1	1	3	0
200217	PRJNA397112	SRR5898911	0	3	0	4	8	3	3	0	7	24	3	0	12	3	8	1	0	9	5	20	0	0	1	0	2	4	5	1	0	2	5	7	0	0	0	0	0	6	4	0	0	14	0	0	0	0	1
200218	PRJNA397112	SRR8865596	2	5	0	1	7	3	4	1	5	16	3	1	7	5	6	0	0	6	2	19	0	1	1	3	1	4	7	0	0	2	4	5	3	0	4	0	0	5	3	1	2	8	4	1	0	2	0
200219	PRJNA397112	SRR8865576	7	14	0	9	20	11	13	6	15	49	2	2	21	15	22	2	0	21	2	28	2	0	7	3	8	12	14	0	0	5	5	25	7	1	4	0	0	7	15	0	2	30	3	7	4	0	0
200220	PRJNA397112	SRR8865582	6	16	2	4	13	8	10	1	11	34	1	2	15	17	13	1	1	16	3	32	1	6	16	7	7	10	14	0	2	3	5	22	5	0	3	2	2	5	10	0	2	26	4	4	1	3	1
200221	PRJNA397112	SRR5898924	3	11	0	5	13	3	7	1	13	32	1	0	23	11	12	4	0	14	2	21	0	2	7	0	2	11	14	1	1	5	7	23	2	0	1	0	0	9	10	0	0	16	0	2	1	2	1
200222	PRJNA397112	SRR5898908	3	13	0	6	14	9	11	3	15	57	1	0	25	14	13	4	0	19	4	37	0	2	14	1	3	7	17	1	1	6	12	22	3	0	1	0	0	9	13	0	0	27	1	1	1	0	0
200223	PRJNA397112	SRR5898922	5	7	0	8	25	12	16	6	16	69	9	4	30	10	19	0	1	23	2	39	1	1	8	5	4	10	14	1	1	6	7	22	11	0	6	0	0	12	20	0	2	35	2	4	1	0	1
200224	PRJNA397112	SRR8865588	3	2	0	2	24	5	8	1	9	33	6	2	13	5	16	1	1	7	6	13	0	6	5	4	3	6	8	1	3	4	6	10	6	0	4	0	0	8	7	1	2	16	2	1	1	1	1
200225	PRJNA397112	SRR5898912	1	9	0	4	6	7	13	2	12	24	0	0	16	9	7	0	0	11	2	22	2	1	9	0	3	7	12	0	1	2	11	18	1	0	1	0	0	3	14	0	0	16	0	0	0	0	0
200227	PRJNA397112	SRR5898984	0	6	0	3	14	4	7	0	10	24	7	0	11	3	9	0	0	10	2	36	0	2	1	0	2	9	11	1	0	3	6	12	3	0	2	0	0	7	11	1	1	21	3	2	0	1	1
200228	PRJNA397112	SRR8865590	6	10	1	8	11	10	10	6	19	57	2	0	27	14	15	2	0	18	1	34	2	2	13	0	2	15	21	0	0	3	13	32	3	1	0	0	0	9	14	0	0	24	0	2	2	0	2
200229	PRJNA397112	SRR5898980	4	6	0	5	17	8	11	1	16	45	5	0	12	10	15	1	1	16	2	41	0	0	8	3	2	10	19	1	0	6	2	20	6	0	3	0	0	11	10	1	1	24	1	5	1	3	0
200230	PRJNA397112	SRR5898909	5	8	0	7	20	8	9	2	12	45	4	2	23	10	16	0	1	13	2	26	0	0	8	1	7	7	12	3	0	7	5	15	7	0	2	0	0	11	10	0	0	25	3	4	0	0	2
200231	PRJNA397112	SRR5898920	2	10	0	2	13	7	8	3	17	44	7	0	28	11	13	2	0	25	2	34	0	3	11	0	3	10	21	0	0	0	9	17	1	0	1	0	1	11	19	1	1	23	2	0	1	1	3
200232	PRJNA397112	SRR5898926	2	9	0	4	7	4	8	2	10	27	0	0	15	9	14	1	0	8	0	24	0	3	8	0	4	8	11	0	1	4	10	18	1	0	3	0	0	3	14	0	1	11	1	1	0	0	1
200233	PRJNA397112	SRR8865589	2	11	1	5	15	6	8	1	16	55	2	0	17	4	16	0	0	23	5	46	1	1	3	2	4	6	19	0	0	5	5	17	2	1	3	0	0	10	15	0	1	35	0	1	2	1	0
200234	PRJNA397112	SRR5899007	2	6	1	3	10	5	4	3	12	29	2	0	15	7	9	0	0	5	1	30	1	1	9	2	5	8	10	1	1	4	5	15	2	0	3	0	0	2	7	0	0	17	2	0	0	0	2
200235	PRJNA397112	SRR5899006	3	8	1	7	20	10	15	4	23	70	6	0	26	10	12	2	0	21	5	34	1	2	8	0	5	13	20	2	1	7	7	26	5	0	1	0	0	7	15	1	0	35	3	1	1	0	2
200236	PRJNA397112	SRR5899005	1	14	1	6	9	5	11	0	16	36	2	0	22	7	14	5	0	14	3	31	0	3	12	0	4	6	17	0	0	5	8	18	3	0	0	0	0	10	18	0	1	14	0	1	0	0	3
200237	PRJNA397112	SRR5898950	0	5	1	2	11	5	10	0	10	35	8	0	15	5	10	0	0	10	6	24	0	1	4	1	3	4	8	1	1	2	6	16	2	0	1	0	0	2	9	0	0	18	0	0	0	0	2
200238	PRJNA397112	SRR5898948	3	3	0	5	13	4	5	4	9	31	1	3	13	6	10	1	2	10	0	23	3	1	9	3	4	14	9	0	3	4	3	15	3	0	2	0	1	2	13	0	0	20	0	3	0	0	0
200239	PRJNA397112	SRR5898910	1	9	0	4	17	4	10	1	11	37	3	0	17	7	13	0	0	10	1	28	1	1	4	0	5	6	12	1	0	2	11	21	2	1	2	0	0	9	11	0	1	16	1	0	0	0	1
200240	PRJNA397112	SRR5898954	1	2	0	2	8	2	5	0	6	15	2	1	7	3	7	0	0	6	1	21	0	1	4	1	3	5	7	0	0	1	5	8	2	0	1	0	0	2	7	0	1	12	2	0	1	2	0
200241	PRJNA397112	SRR5899017	1	9	0	3	12	5	7	0	11	31	7	0	16	5	6	0	0	9	4	31	0	0	3	2	1	3	9	0	0	1	5	13	5	0	2	0	0	4	13	0	0	12	0	0	0	0	1
200242	PRJNA397112	SRR5898966	1	8	0	4	6	3	12	2	15	40	1	0	12	12	13	1	0	8	1	28	0	3	10	0	1	6	17	1	1	4	4	19	2	0	1	0	0	5	13	0	0	14	1	1	0	0	1
[truncated: 2,380 more columns]
