# Supplementary material for: The Archaeome's Role in Colorectal Cancer: Unveiling the DPANN Group and Investigating Archaeal Functional Signatures
Source: Preprints.org preprint supplement (doi:10.20944/preprints202308.1572.v1), 2023-08-22
Supplement: Supplementary file 6 [file Supplementary data S6 (Biostatistical analysis for the functional analysis).xlsx]

## Sheet: Biostatistical analysis
Proteins	Correlation (r)	p-value
(4S)-4-hydroxy-5-phosphonooxypentane-2,3-dione isomerase	0.029846	0.557787
(5-formylfuran-3-yl)methyl phosphate transaminase	-0.0205441	0.686647
(R)-citramalate synthase	0.109245	0.0314465
(R)-citramalate synthase CimA	0.0340616	0.503518
[LysW]-aminoadipate semialdehyde/glutamate semialdehyde transaminase	-0.115192	0.0232529
[LysW]-aminoadipate/[LysW]-glutamate kinase	-0.103122	0.0423438
[LysW]-L-2-aminoadipate/[LysW]-L-glutamate phosphate reductase	-0.126876	0.0123769
[LysW]-lysine/[LysW]-ornithine hydrolase	0.0400097	0.431943
1-deoxy-D-xylulose 5-phosphate reductoisomerase	-0.0959099	0.0590979
1-deoxy-D-xylulose-5-phosphate synthase	-0.0488653	0.337054
1-phosphofructokinase	-0.14893	0.00327645
1-pyrroline-5-carboxylate dehydrogenase	0.101664	0.0453627
1,4-alpha-glucan branching enzyme GlgB	-0.13314	0.00864463
1,4-dihydroxy-2-naphthoate octaprenyltransferase	0.0352703	0.488486
1,4-dihydroxy-2-naphthoyl-CoA hydrolase	-0.0683373	0.179169
1,4-dihydroxy-2-naphthoyl-CoA synthase	0.103963	0.0406794
1,4-dihydroxy-6-naphtoate synthase	-0.0426043	0.402661
10 kDa chaperonin	-0.0550765	0.279162
16S ribosomal RNA	0.152452	0.00260488
16S ribosomal RNA (partial)	0.0261282	0.607886
1D-myo-inositol 2-acetamido-2-deoxy-alpha-D-glucopyranoside deacetylase	-0.0519334	0.307558
2-(5''-triphosphoribosyl)-3'-dephosphocoenzyme-A synthase	0.0553375	0.276887
2-amino-3-ketobutyrate coenzyme A ligase	0.144748	0.00427572
2-amino-3,7-dideoxy-D-threo-hept-6-ulosonate synthase	0.137746	0.00657795
2-aminoethylphosphonate--pyruvate transaminase	-0.0309261	0.543617
2-C-methyl-D-erythritol 2,4-cyclodiphosphate synthase	-0.0891423	0.0794773
2-C-methyl-D-erythritol 4-phosphate cytidylyltransferase	-0.084939	0.0947756
2-dehydro-3-deoxy-D-arabinonate dehydratase	0.0100005	0.844331
2-dehydro-3-deoxy-D-gluconate/2-dehydro-3-deoxy-phosphogluconate aldolase	-0.0877506	0.0843042
2-dehydro-3-deoxygluconokinase	-0.129157	0.0108792
2-dehydro-3-deoxygluconokinase/2-dehydro-3-deoxygalactonokinase	-0.0817179	0.108021
2-dehydro-3-deoxyphosphooctonate aldolase	-0.0340777	0.503316
2-dehydropantoate 2-reductase	-0.0898505	0.0771084
2-hydroxy-3-keto-5-methylthiopentenyl-1-phosphate phosphatase	0.0920868	0.0700018
2-hydroxy-3-oxopropionate reductase	0.0274423	0.58995
2-hydroxy-6-oxo-6-phenylhexa-2,4-dienoate hydrolase	0.0384718	0.449865
2-hydroxy-6-oxononadienedioate/2-hydroxy-6-oxononatrienedioate hydrolase	0.0823004	0.105524
2-iminobutanoate/2-iminopropanoate deaminase	-0.070062	0.168419
2-isopropylmalate synthase	-0.121048	0.0170578
2-keto-3-deoxy-L-rhamnonate aldolase	0.0117119	0.818121
2-keto-3-deoxygluconate permease	0.0516702	0.31002
2-methoxy-6-polyprenyl-1,4-benzoquinol methylase, mitochondrial	-0.0326095	0.521892
2-methylisocitrate lyase	-0.0177044	0.728112
2-oxoacid:ferredoxin oxidoreductase 1, subunit alpha	0.0638918	0.209208
2-oxoacid:ferredoxin oxidoreductase 2, subunit alpha	0.0765988	0.132024
2-oxoglutarate dehydrogenase E1 component	0.107373	0.0344895
2-oxoglutarate synthase subunit KorA	0.169544	0.000798949
2-oxoglutarate synthase subunit KorB	0.135405	0.00756558
2-oxoglutarate synthase subunit KorC	0.138133	0.00642618
2-phosphosulfolactate phosphatase	0.245129	1.02041e-06
2-phytyl-1,4-beta-naphthoquinone methyltransferase, chloroplastic	-0.0377934	0.457901
2-succinyl-5-enolpyruvyl-6-hydroxy-3-cyclohexene-1-carboxylate synthase	0.00191141	0.970063
2-succinyl-6-hydroxy-2,4-cyclohexadiene-1-carboxylate synthase	-0.03782	0.457584
2-succinylbenzoate--CoA ligase	-0.0100419	0.843696
2,3-bisphosphoglycerate-dependent phosphoglycerate mutase	-0.144491	0.00434522
2,3-bisphosphoglycerate-independent phosphoglycerate mutase	-0.0414453	0.415591
2,3-bisphosphoglycerate-independent phosphoglycerate mutase 1	0.0404779	0.42657
2,3-diketo-5-methylthiopentyl-1-phosphate enolase	-0.101096	0.0465862
2,3-diketo-L-gulonate reductase	0.0364284	0.474313
2,3,4,5-tetrahydropyridine-2,6-dicarboxylate N-acetyltransferase	-0.0310622	0.541843
2,3,4,5-tetrahydropyridine-2,6-dicarboxylate N-succinyltransferase	0.0117726	0.817196
2,5-diamino-6-ribosylamino-4(3H)-pyrimidinone 5'-phosphate reductase	-0.077643	0.126821
2,5-dioxopentanoate dehydrogenase	0.0808153	0.111983
2'-deoxynucleoside 5'-phosphate N-hydrolase 1	0.124929	0.0137957
23S ribosomal RNA	0.144987	0.00421195
23S ribosomal RNA (partial)	0.0870474	0.0868312
23S rRNA (guanosine-2'-O-)-methyltransferase RlmB	-0.13182	0.00933542
23S rRNA (uracil(1939)-C(5))-methyltransferase RlmD	-0.0843873	0.0969476
23S rRNA (uracil(747)-C(5))-methyltransferase	-0.116382	0.0218559
3-(3-hydroxy-phenyl)propionate/3-hydroxycinnamic acid hydroxylase	0.0990132	0.0513154
3-dehydroquinate dehydratase	-0.195172	0.000109144
3-dehydroquinate synthase	-0.0922623	0.0694676
3-deoxy-D-manno-octulosonic acid kinase	-0.0270856	0.594794
3-hydroxyanthranilate 3,4-dioxygenase	-0.0449416	0.377325
3-hydroxypropionyl-coenzyme A dehydratase	-0.0473058	0.352719
3-hydroxypropionyl-coenzyme A synthetase	-0.00697558	0.891061
3-isopropylmalate dehydratase large subunit	-0.108664	0.0323653
3-isopropylmalate dehydratase small subunit	-0.0152471	0.764649
3-isopropylmalate dehydrogenase	-0.136444	0.00711184
3-isopropylmalate/3-methylmalate dehydrogenase	-0.171	0.000718585
3-ketoacyl-CoA thiolase	-0.0408547	0.422273
3-methyl-2-oxobutanoate hydroxymethyltransferase	-0.051874	0.308114
3-methylornithine synthase	-0.116617	0.0215885
3-methylornithine--L-lysine ligase	0.0493415	0.332361
3-octaprenyl-4-hydroxybenzoate carboxy-lyase	0.0248322	0.625808
3-phenylpropionate-dihydrodiol/cinnamic acid-dihydrodiol dehydrogenase	-0.00330961	0.948189
3-phenylpropionate/cinnamic acid dioxygenase ferredoxin--NAD(+) reductase component	-0.0311542	0.540647
3-phosphoshikimate 1-carboxyvinyltransferase	-0.111545	0.0280244
3-sulfolactaldehyde reductase	-0.0245145	0.630237
3,4-dihydroxy-2-butanone 4-phosphate synthase	0.0319272	0.530644
3'-5' exonuclease DinG	-0.123084	0.0152714
3'-5' exoribonuclease YhaM	-0.100473	0.0479614
3'-5' ssDNA/RNA exonuclease TatD	0.0126011	0.804582
3',5'-cyclic adenosine monophosphate phosphodiesterase CpdA	-0.0277199	0.586192
3'(2'),5'-bisphosphate nucleotidase CysQ	-0.0258648	0.611511
30S ribosomal protein S10	-0.0269804	0.596227
30S ribosomal protein S11	-0.0673881	0.185299
30S ribosomal protein S13	-0.00562286	0.912091
30S ribosomal protein S17	-0.00223468	0.965003
30S ribosomal protein S19	-0.00933981	0.854497
30S ribosomal protein S2	-0.0513953	0.312605
30S ribosomal protein S3	-0.0740104	0.145634
30S ribosomal protein S5	-0.0254055	0.617852
30S ribosomal protein S7	-0.0608657	0.231636
30S ribosomal protein S8	-0.0250867	0.622271
30S ribosomal protein S9	0.0601917	0.236854
33 kDa chaperonin	-0.105534	0.0377215
4-amino-4-deoxy-L-arabinose-phosphoundecaprenol flippase subunit ArnE	-0.0684479	0.178465
4-amino-4-deoxy-L-arabinose-phosphoundecaprenol flippase subunit ArnF	-0.00298891	0.953203
4-deoxy-4-formamido-L-arabinose-phosphoundecaprenol deformylase ArnD	0.0108175	0.831796
4-deoxy-L-threo-5-hexosulose-uronate ketol-isomerase	-0.129405	0.010726
4-hydroxy-2-oxo-heptane-1,7-dioate aldolase	0.119226	0.0188091
4-hydroxy-2-oxovalerate aldolase	-0.138094	0.00644156
4-hydroxy-3-methylbut-2-en-1-yl diphosphate synthase (ferredoxin)	-0.101298	0.0461474
4-hydroxy-3-methylbut-2-enyl diphosphate reductase	-0.0618702	0.22401
4-hydroxy-tetrahydrodipicolinate reductase	-0.0838121	0.0992536
4-hydroxy-tetrahydrodipicolinate synthase	-0.0321933	0.527222
4-hydroxybenzoate polyprenyltransferase, mitochondrial	0.0239642	0.637937
4-hydroxybutyrate--CoA ligase 1	-0.0108578	0.831178
4-hydroxybutyrate--CoA ligase 2	-0.100447	0.0480192
4-hydroxythreonine-4-phosphate dehydrogenase	0.0515976	0.310702
4-O-beta-D-mannosyl-D-glucose phosphorylase	-0.138016	0.00647187
5-amino-6-(D-ribitylamino)uracil--L-tyrosine 4-hydroxyphenyl transferase	-0.0636135	0.211203
5-dehydro-2-deoxygluconokinase	-0.147326	0.00363148
5-deoxy-glucuronate isomerase	-0.0696283	0.171076
5-keto-4-deoxy-D-glucarate aldolase	0.0675304	0.18437
5-methyltetrahydropteroyltriglutamate--homocysteine methyltransferase	-0.172293	0.000653579
5-oxoprolinase subunit A	-0.021269	0.676206
5'-deoxyadenosine deaminase	0.0314929	0.536253
5'-deoxynucleotidase YfbR	-0.0806313	0.112805
5'-methylthioadenosine/S-adenosylhomocysteine nucleosidase	-0.11562	0.0227418
5'-nucleotidase SurE1	0.013236	0.794949
5'/3'-nucleotidase SurE	0.0531113	0.296702
50S ribosomal protein L1	-0.00036343	0.994307
50S ribosomal protein L11	-0.0310135	0.542477
50S ribosomal protein L13	0.00828376	0.870796
50S ribosomal protein L14	-0.0104907	0.836805
50S ribosomal protein L15	0.0193763	0.703595
50S ribosomal protein L18	-0.0916997	0.0711922
50S ribosomal protein L2	0.0367933	0.469895
50S ribosomal protein L22	0.0320717	0.528784
50S ribosomal protein L23	-0.034155	0.502347
50S ribosomal protein L29	-0.0157589	0.756992
50S ribosomal protein L3	0.0661123	0.193779
50S ribosomal protein L30e	0.0135326	0.79046
50S ribosomal protein L4	-0.0438789	0.38872
50S ribosomal protein L5	0.00337152	0.947221
50S ribosomal protein L6	-0.032868	0.518596
50S ribosomal protein L7Ae	-0.067977	0.181478
5S ribosomal RNA	0.0397752	0.434649
5S ribosomal RNA (partial)	0.04921	0.333652
6-phospho-beta-galactosidase	-0.130044	0.0103415
6-phosphogluconate dehydrogenase, NAD(+)-dependent, decarboxylating	-0.0699766	0.16894
6-phosphogluconolactonase	-0.0795143	0.117894
6,7-dimethyl-8-ribityllumazine synthase	-0.106101	0.0366976
60 kDa chaperonin	-0.103023	0.0425435
7-carboxy-7-deazaguanine synthase	-0.0535542	0.292686
7-cyano-7-deazaguanine synthase	-0.117963	0.0201139
7,8-didemethyl-8-hydroxy-5-deazariboflavin synthase	-0.0996239	0.0498892
7,8-dihydropterin-6-methyl-4-(beta-D-ribofuranosyl)-aminobenzene-5'-phosphate synthase	0.0946621	0.0624909
8-amino-3,8-dideoxy-manno-octulosonate cytidylyltransferase	-0.0128898	0.800198
8-amino-7-oxononanoate synthase	0.106531	0.0359393
Accessory gene regulator protein B	-0.215161	1.91419e-05
Acetate kinase	-0.0228961	0.652995
Acetate--CoA ligase [ADP-forming]	-0.00183235	0.971301
Acetate--CoA ligase [ADP-forming] I	0.0342919	0.500636
Acetate--CoA ligase [ADP-forming] I subunit alpha	-0.0435438	0.392357
Acetate--CoA ligase [ADP-forming] II subunit beta	0.0192975	0.704744
Acetyl esterase	-0.142309	0.00497837
Acetyl-CoA decarbonylase/synthase complex subunit beta 2	-0.0769429	0.130292
Acetyl-CoA decarbonylase/synthase complex subunit delta	-0.0475	0.350743
Acetyl-CoA decarbonylase/synthase complex subunit gamma	-0.13126	0.00964265
Acetyl-coenzyme A carboxylase carboxyl transferase subunit alpha	-0.185028	0.000247769
Acetyl-coenzyme A carboxylase carboxyl transferase subunit beta, chloroplastic	-0.194564	0.000114779
Acetyl-coenzyme A synthetase	0.0421528	0.407669
Acetylglutamate kinase	-0.169279	0.00081445
Acetylornithine deacetylase	-0.0140623	0.782459
Acetylornithine/succinyldiaminopimelate aminotransferase	-0.115249	0.023184
Acetyltransferase YpeA	-0.0549169	0.280561
Acid shock protein	0.101952	0.0447514
Acid stress chaperone HdeA	0.0588005	0.247887
Acireductone dioxygenase	0.12415	0.0144028
Acryloyl-coenzyme A reductase	0.0220162	0.665508
Acyl carrier protein	-0.0768906	0.130554
Acyl carrier protein phosphodiesterase	0.119577	0.0184607
Acylamino-acid-releasing enzyme	0.0876164	0.0847819
Acylphosphatase	-0.1595	0.00162243
Adaptive-response sensory-kinase SasA	-0.0613835	0.227682
Adenine deaminase	-0.0250222	0.623167
Adenine phosphoribosyltransferase	-0.142138	0.00503151
Adenosine deaminase	-0.155501	0.00212741
Adenosylcobinamide-GDP ribazoletransferase	-0.137292	0.00676002
Adenosylmethionine-8-amino-7-oxononanoate aminotransferase	0.00866384	0.864923
Adenylate kinase	-0.0683269	0.179236
Adenylosuccinate synthetase	-0.0899607	0.076745
Adenylosuccinate synthetase, organellar chromatophore	-0.112549	0.026633
Adenylyl-sulfate kinase	0.0151269	0.76645
ADP-dependent glucokinase	-0.0518971	0.307898
ADP-dependent ribose-1-phosphate kinase	-0.0550929	0.27902
ADP-L-glycero-D-manno-heptose-6-epimerase	-0.0646382	0.203926
ADP-ribose glycohydrolase	-0.0759305	0.13544
ADP-ribose pyrophosphatase	-0.0829351	0.102854
Agmatinase	-0.019748	0.698183
Agmatine deiminase	-0.0670622	0.187438
Alanine dehydrogenase	0.0221083	0.664193
Alanine racemase	-0.0272095	0.593111
Alanine--tRNA ligase	-0.0835128	0.100471
Alanyl-tRNA editing protein AlaX-M	0.0299222	0.556782
Alanyl-tRNA editing protein AlaX-S	0.0889612	0.0800924
Aliphatic amidase	0.034515	0.497851
Alkanesulfonate monooxygenase	0.101709	0.0452678
Alkyl hydroperoxide reductase AhpD	0.048291	0.34277
Allantoinase	0.0328941	0.518264
Alpha-1,4-glucan:maltose-1-phosphate maltosyltransferase	-0.0729477	0.151521
Alpha-aminoadipate--LysW ligase LysX	0.0171422	0.73642
Alpha-amylase MalA	-0.181709	0.00032105
Alpha-glucosidase	-0.183354	0.000282521
Alpha-ketoglutarate semialdehyde dehydrogenase	0.0382517	0.452463
Alpha-xylosidase	-0.145024	0.00420215
Altronate oxidoreductase	-0.154667	0.00224937
Amidase	-0.152839	0.00253931
Amidophosphoribosyltransferase	-0.0930999	0.0669635
Amino-acid acetyltransferase	0.0228486	0.653668
AMP nucleosidase	0.0925024	0.068742
AMP phosphorylase	-0.110427	0.0296453
Anaerobic glycerol-3-phosphate dehydrogenase subunit A1	-0.00149697	0.976552
Anaerobic glycerol-3-phosphate dehydrogenase subunit A2	-0.0610369	0.230323
Anaerobic glycerol-3-phosphate dehydrogenase subunit B	-0.0061502	0.903885
Anaerobic nitric oxide reductase flavorubredoxin	-0.0979467	0.0538876
Anaerobic nitric oxide reductase transcription regulator NorR	0.061268	0.22856
Anhydro-N-acetylmuramic acid kinase	-0.0556892	0.273841
Anthranilate phosphoribosyltransferase	-0.201491	6.40999e-05
Anthranilate synthase component 1	-0.161895	0.00137522
Anthranilate synthase component 2	-0.148127	0.00345004
Anti-adapter protein IraD	0.0756403	0.136945
Anti-adapter protein IraP	0.0806055	0.112921
Anti-sigma F factor	-0.0605543	0.234036
Antiholin-like protein LrgA	-0.168407	0.000867375
apo-citrate lyase phosphoribosyl-dephospho-CoA transferase	0.0412359	0.417953
Apolipoprotein N-acyltransferase	0.0246724	0.628035
Aquaporin AqpM	0.0568301	0.264116
Aquaporin Z	-0.0450971	0.375674
Arabinonate dehydratase	-0.00353816	0.944616
Archaeal actin	-0.173529	0.000596572
Archaeal Lon protease	-0.0235224	0.644149
Archaetidylinositol phosphate synthase	-0.0896794	0.0776752
Archaetidylserine synthase	-0.135549	0.00750105
Arginine biosynthesis bifunctional protein ArgJ, chloroplastic	-0.077514	0.127455
Arginine deiminase	0.162731	0.00129744
Arginine exporter protein ArgO	0.0978453	0.0541378
Arginine N-succinyltransferase	0.0995128	0.0501461
Arginine repressor	-0.0818612	0.107402
Arginine--tRNA ligase	-0.0602992	0.236016
Arginine/ornithine antiporter ArcD	0.0789342	0.120608
Argininosuccinate lyase	-0.108698	0.0323108
Argininosuccinate synthase	-0.100308	0.0483303
Aromatic-amino-acid aminotransferase 1	-0.00713376	0.888607
Aromatic-amino-acid aminotransferase 2	-0.0883416	0.0822262
Arsenate reductase	-0.0704582	0.166019
Arsenite methyltransferase	0.0526911	0.300545
Aryldialkylphosphatase	0.163088	0.00126544
Arylesterase	3.47401e-05	0.999456
Asparagine--tRNA ligase	-0.0220758	0.664657
Aspartate 1-decarboxylase	-0.0952905	0.0607627
Aspartate aminotransferase	-0.128383	0.011368
Aspartate carbamoyltransferase	-0.102939	0.0427122
Aspartate carbamoyltransferase regulatory chain	-0.0986795	0.0521091
Aspartate racemase	-0.00461617	0.927783
Aspartate--ammonia ligase	-0.0417892	0.411729
Aspartate--tRNA(Asp) ligase	-0.168338	0.000871686
Aspartate--tRNA(Asp/Asn) ligase	-0.105103	0.038513
Aspartate-semialdehyde dehydrogenase	-0.0700526	0.168477
aspartoacylase	0.0876028	0.0848304
Aspartyl/glutamyl-tRNA(Asn/Gln) amidotransferase subunit B	-0.162038	0.00136163
Assimilatory ferredoxin-dependent nitrite reductase	0.00734866	0.885274
Assimilatory nitrate reductase	-0.105156	0.0384147
ATP phosphoribosyltransferase	-0.13493	0.00778104
ATP phosphoribosyltransferase regulatory subunit	-0.139866	0.00578483
ATP synthase epsilon chain	-0.164716	0.00112862
ATP synthase gamma chain	-0.154598	0.00225979
ATP synthase subunit a	-0.13834	0.0063463
ATP synthase subunit alpha	-0.15901	0.00167768
ATP synthase subunit b	-0.175615	0.00051065
ATP synthase subunit beta	-0.154681	0.00224735
ATP synthase subunit c	-0.113355	0.0255602
ATP synthase subunit delta	-0.16296	0.00127685
ATP-dependent (S)-NAD(P)H-hydrate dehydratase	-0.124817	0.013882
ATP-dependent 6-phosphofructokinase	-0.00372142	0.941753
ATP-dependent Clp protease adapter protein ClpS	-0.0248001	0.626255
ATP-dependent Clp protease ATP-binding subunit ClpX	-0.092152	0.0698031
ATP-dependent Clp protease proteolytic subunit	-0.0841261	0.0979893
ATP-dependent dethiobiotin synthetase BioD	0.0223022	0.66143
ATP-dependent DNA helicase	-0.0856537	0.0920201
ATP-dependent DNA helicase DinG	0.0376389	0.459743
ATP-dependent DNA helicase Rep	-0.115992	0.0223055
ATP-dependent helicase/deoxyribonuclease subunit B	-0.142875	0.00480657
ATP-dependent helicase/nuclease subunit A	-0.116963	0.0212014
ATP-dependent protease ATPase subunit HslU	0.119055	0.0189813
ATP-dependent protease subunit HslV	0.116198	0.0220673
ATP-dependent RecD-like DNA helicase	-0.0682758	0.179562
ATP-dependent RNA helicase DbpA	-0.146987	0.00371083
ATP-dependent RNA helicase DeaD	-0.101313	0.0461166
ATP-dependent RNA helicase RhlB	-0.144651	0.00430185
ATP-dependent RNA helicase RhlE	-0.131873	0.00930641
ATP-dependent RNA helicase SrmB	-0.0822718	0.105645
ATP-dependent zinc metalloprotease FtsH	-0.110903	0.0289449
ATPase RavA	-0.053189	0.295994
Autoinducer-2 kinase	0.135694	0.00743651
Autonomous glycyl radical cofactor	-0.115055	0.0234187
Bacteriohemerythrin	-0.170656	0.000736891
Beta-barrel assembly-enhancing protease	0.0290284	0.568631
Beta-galactosidase	-0.0875545	0.0850029
Beta-galactosidase BgaH	-0.155544	0.00212135
Beta-hexosaminidase	-0.127749	0.0117835
Bifunctional enzyme Fae/Hps	0.12983	0.0104689
Bifunctional enzyme IspD/IspF	-0.0531228	0.296597
Bifunctional F420 biosynthesis protein FbiB	-0.0750752	0.139911
Bifunctional glutamine synthetase adenylyltransferase/adenylyl-removing enzyme	-0.120734	0.0173497
Bifunctional ligase/repressor BirA	-0.131039	0.00976668
Bifunctional NADP phosphatase/NAD kinase	-0.0664535	0.191483
Bifunctional pantoate ligase/cytidylate kinase	-0.061891	0.223854
Bifunctional polymyxin resistance protein ArnA	0.0705517	0.165457
Bifunctional protein Aas	-0.0945895	0.0626934
Bifunctional protein FolD protein	-0.0580285	0.25416
Bifunctional protein GlmU	-0.11358	0.0252672
Bifunctional protein HldE	-0.0507992	0.318258
Bifunctional protein PyrR	0.00372251	0.941736
Bifunctional purine biosynthesis protein PurH	-0.0830542	0.102359
Bifunctional sugar-1-phosphate nucleotidylyltransferase/acetyltransferase	-0.0800799	0.115295
Bifunctional thiamine biosynthesis protein ThiDN	-0.154341	0.00229874
Bifunctional trehalose-6-phosphate synthase/phosphatase	0.0828459	0.103226
Bifunctional uridylyltransferase/uridylyl-removing enzyme	-0.150409	0.00297741
Biosynthetic arginine decarboxylase	0.0435	0.392833
Biosynthetic peptidoglycan transglycosylase	-0.0691446	0.174076
Biotin synthase	-0.0908998	0.073704
Bis(5'-nucleosyl)-tetraphosphatase, symmetrical	-0.0334446	0.511283
butyrate kinase	0.0968858	0.0565517
butyrate:acetyl-CoA coenzyme A-transferase	0.0991848	0.0509113
Butyryl-CoA:acetate CoA-transferase	-0.178851	0.000399854
CAAX prenyl protease 2	-0.0576809	0.257021
Calcium-gated potassium channel MthK	0.0227012	0.655758
Carbamate kinase	-0.0509233	0.317076
Carbamoyl-phosphate synthase large chain	-0.0988279	0.0517549
Carbamoyl-phosphate synthase small chain	-0.106539	0.035925
Carbon disulfide hydrolase	-0.00540112	0.915545
Carbonic anhydrase	-0.153248	0.0024716
Carboxy-S-adenosyl-L-methionine synthase	-0.128148	0.0115205
Cardiolipin synthase	-0.0917891	0.0709159
Cardiolipin synthase A	0.0395989	0.436689
Cardiolipin synthase B	0.102235	0.0441585
Cardiolipin synthase C	0.109663	0.030799
Carnitine monooxygenase reductase subunit	0.0945724	0.062741
Carnitine operon protein CaiE	-0.086782	0.0878009
Carotenoid 3,4-desaturase	-0.025611	0.615012
Catabolic 3-dehydroquinase	-0.0191487	0.706914
Catalase-peroxidase	0.0888259	0.0805544
Cation/acetate symporter ActP	-0.0798672	0.116268
CCA-adding enzyme	-0.117405	0.0207142
CDP-diacylglycerol pyrophosphatase	0.0431643	0.396499
CDP-diacylglycerol--glycerol-3-phosphate 3-phosphatidyltransferase	-0.0428592	0.399849
Cell cycle protein GpsB	-0.0541562	0.287287
Cell division coordinator CpoB	-0.00247281	0.961277
Cell division protein DamX	0.07439	0.143573
Cell division protein DedD	0.0147677	0.771841
Cell division protein DivIB	-0.132627	0.00890748
Cell division protein FtsA	-0.0391515	0.441892
Cell division protein FtsB	-0.0169777	0.738858
Cell division protein FtsL	-0.117092	0.0210584
Cell division protein FtsN	-0.028038	0.5819
Cell division protein FtsQ	-0.046564	0.360327
Cell division protein FtsZ	-0.0913053	0.0724217
Cell division protein FtsZ 1	-0.0888633	0.0804264
Cell division protein SepF	-0.0911855	0.0727987
cell division protein WhiA	-0.112211	0.0270945
Cell division protein ZapA	-0.139066	0.0060735
Cell division protein ZapB	-0.00601321	0.906016
Cell division protein ZapD	0.0138535	0.785611
Cell division protein ZapE	0.0170819	0.737313
Cell division protein ZipA	-0.052589	0.301484
Cell division suppressor protein YneA	-0.122498	0.0157675
Cell division topological specificity factor	-0.179838	0.00037081
Cell shape-determining protein MreB	-0.112605	0.0265571
Cellobiose 2-epimerase	0.0249738	0.623839
Chaperone modulatory protein CbpM	0.150814	0.00289995
Chaperone NapD	-0.0963538	0.0579283
Chaperone protein DnaJ	-0.110179	0.0300163
Chaperone protein DnaK	-0.11031	0.0298192
Chaperone protein HscA	-0.0782349	0.123942
Chaperone protein HtpG	-0.0977553	0.0543605
Chaperone protein TorD	-0.111328	0.0283324
Chaperone SurA	0.0639124	0.209061
Chemoreceptor glutamine deamidase CheD	-0.213588	2.20871e-05
Chemotactic signal transduction system substrate-binding protein CosB	0.0890102	0.0799255
Chemotaxis protein CheA	-0.218847	1.36312e-05
Chemotaxis protein CheY	-0.169875	0.000779992
Chemotaxis protein methyltransferase	-0.062129	0.222075
Chitooligosaccharide deacetylase	-0.0159463	0.754195
Chlorinase	0.153172	0.00248407
Choline trimethylamine-lyase	-0.0184956	0.716474
Choline trimethylamine-lyase activating enzyme	-0.092524	0.0686771
Chorismate mutase	0.0071149	0.8889
Chorismate pyruvate-lyase	0.168713	0.000848428
Chorismate synthase	-0.0978193	0.0542019
Chromosomal replication initiator protein DnaA	-0.0729951	0.151255
Chromosome partition protein MukB	0.0392937	0.440234
Chromosome partition protein MukE	0.019248	0.705465
Chromosome partition protein MukF	0.0106078	0.83501
Chromosome partition protein Smc	-0.149659	0.00312577
Chromosome-anchoring protein RacA	-0.131228	0.00966069
Citrate lyase acyl carrier protein	0.105239	0.0382611
Citrate synthase	-0.148198	0.00343442
Co-chaperone protein DjlA	-0.0515508	0.311141
Co-chaperone protein HscB	-0.0342659	0.50096
Cobalamin biosynthesis protein CbiB	-0.162221	0.00134434
Cobalamin import ATP-binding protein BtuD	-0.0180014	0.723735
Cobalamin import system permease protein BtuC	-0.0674938	0.184609
Cobalamin-binding protein	-0.0234195	0.645599
Cobalt transport protein CbiM	-0.0384608	0.449994
Cobalt transport protein CbiN	0.0935017	0.0657888
Cobalt-precorrin-5B C(1)-methyltransferase	-0.147415	0.00361104
Cobalt/magnesium transport protein CorA	-0.0543795	0.285301
Cobyric acid synthase	-0.148399	0.00339029
Cobyrinate a,c-diamide synthase	-0.148977	0.00326661
Coenzyme A biosynthesis bifunctional protein CoaBC	-0.143351	0.00466643
Coenzyme A disulfide reductase	0.0741423	0.144915
Coenzyme F420 hydrogenase subunit alpha	0.12442	0.01419
Coenzyme F420 hydrogenase subunit gamma	-0.126942	0.0123309
Coenzyme F420-dependent sulfite reductase	-0.161318	0.0014314
Coenzyme PQQ synthesis protein B	0.0412984	0.417248
Copper chaperone CopZ	0.0933726	0.0661644
Copper homeostasis protein CutC	-0.0732038	0.150086
Copper-exporting P-type ATPase B	-0.0692029	0.173712
CRISPR-associated endonuclease Cas1	-0.109337	0.0313037
CRISPR-associated endonuclease Cas1 1	0.0128378	0.800987
CRISPR-associated endonuclease Cas9	-0.0988808	0.0516291
CRISPR-associated endoribonuclease Cas2	-0.0987456	0.0519511
CRISPR-associated endoribonuclease Cas6	0.112204	0.0271046
CRISPR-associated endoribonuclease Cas6 1	-0.0224403	0.659465
CRISPR-associated nuclease/helicase Cas3	-0.0804006	0.113842
CRISPR-associated protein Cas7	-0.00901825	0.859454
Crossover junction endodeoxyribonuclease RuvC	0.0078894	0.876897
Crotonobetainyl-CoA reductase	0.0400663	0.431291
CTP synthase	-0.0991138	0.0510781
Curved DNA-binding protein	0.0842532	0.0974815
Cyanate hydratase	-0.0890445	0.079809
Cyclic dehypoxanthine futalosine synthase	-0.0578838	0.255348
Cyclic pyranopterin monophosphate synthase	-0.0894765	0.078352
Cysteate synthase	0.0771082	0.129465
Cysteine desulfurase	-0.100164	0.0486549
Cysteine desulfurase IscS	-0.0493081	0.332688
Cysteine desulfurase IscS 2	-0.143283	0.00468622
Cysteine desulfuration protein SufE	0.0950848	0.061324
Cysteine--tRNA ligase	-0.0820432	0.10662
Cytidine deaminase	-0.0839662	0.0986316
Cytidine kinase	-0.0980982	0.0535159
Cytidylate kinase	-0.131503	0.00950803
Cytochrome b6-f complex iron-sulfur subunit	0.0680791	0.180822
Cytochrome c biogenesis protein Ccs1	0.0836381	0.0999598
Cytochrome c biogenesis protein CcsA	0.0527156	0.30032
Cytochrome c-552	0.014667	0.773354
Cytochrome c-type biogenesis protein CcmE	-0.0865544	0.0886393
Cytoplasmic trehalase	-0.00707922	0.889453
Cytoskeleton protein RodZ	-0.0704625	0.165993
cytosol aminopeptidase	0.074906	0.140809
D-2-hydroxyacid dehydrogenase	0.0222194	0.66261
D-alanine--D-alanine ligase	-0.0725077	0.154012
D-alanine--D-alanyl carrier protein ligase	-0.0302868	0.551983
D-alanyl carrier protein	-0.0634506	0.212377
D-alanyl-D-alanine dipeptidase	-0.0147318	0.772381
D-allose kinase	-0.0457803	0.368477
D-amino acid dehydrogenase	-0.153157	0.00248648
D-aminoacyl-tRNA deacylase	-0.0702881	0.167046
D-aminopeptidase	0.073097	0.150684
D-cysteine desulfhydrase	0.112393	0.0268449
D-erythrose-4-phosphate dehydrogenase	0.0347781	0.494578
D-galactonate dehydratase	-0.0286622	0.573521
D-gluconate/D-galactonate dehydratase	-0.0117531	0.817494
D-glyceraldehyde dehydrogenase (NADP(+))	-0.00729947	0.886037
D-inositol-3-phosphate glycosyltransferase	-0.070949	0.163081
D-lactate dehydrogenase (acceptor)	0.00364997	0.942869
D-phenylhydantoinase	0.0405839	0.425359
D-proline dehydrogenase	0.100106	0.0487861
D-ribose pyranase	0.0321382	0.52793
D-serine dehydratase	-0.113594	0.0252491
D-tagatose-1,6-bisphosphate aldolase subunit GatY	-0.0226915	0.655896
D-tagatose-1,6-bisphosphate aldolase subunit GatZ	0.0727331	0.152732
D-tagatose-1,6-bisphosphate aldolase subunit KbaY	-0.0445932	0.381037
D-tagatose-1,6-bisphosphate aldolase subunit KbaZ	0.168492	0.000862062
D-xylonate dehydratase	-0.0197959	0.697488
D-xylose 1-dehydrogenase (NADP(+)) 1	0.0238886	0.638998
D-xylose 1-dehydrogenase (NADP(+)) 2	-0.108618	0.032439
Damage-control phosphatase	-0.0128503	0.800797
dCTP deaminase, dUMP-forming	0.0554012	0.276333
DEAD-box ATP-dependent RNA helicase CshA	-0.0722141	0.15569
DEAD-box ATP-dependent RNA helicase CshB	-0.0518792	0.308065
Deglycase	-0.0945573	0.0627832
Deglycase PfpI	-0.103529	0.0415312
Deoxyguanosinetriphosphate triphosphohydrolase	0.121555	0.0165964
Deoxyguanosinetriphosphate triphosphohydrolase-like protein	-0.102651	0.0433007
Deoxyribose-phosphate aldolase	0.0052238	0.918308
Deoxyuridine 5'-triphosphate nucleotidohydrolase	-0.0906194	0.0746015
Dephospho-CoA kinase	-0.0795003	0.117959
Der GTPase-activating protein YihI	0.0464877	0.361116
Diacetylchitobiose deacetylase	0.0608167	0.232012
Diadenylate cyclase	-0.0878606	0.0839142
Diaminopimelate decarboxylase	-0.136663	0.00701922
Diaminopimelate epimerase	-0.12672	0.0124855
Digeranylgeranylglycerophospholipid reductase	0.113754	0.0250424
Dihydrofolate reductase HdrA	-0.150589	0.00294263
Dihydrofolate reductase HdrB	-0.0613268	0.228113
Dihydrolipoyl dehydrogenase	0.122138	0.0160802
Dihydromethanophenazine:CoB--CoM heterodisulfide reductase subunit D	0.0107097	0.833447
Dihydromethanopterin reductase (acceptor)	0.0763084	0.133501
Dihydroneopterin monophosphate aldolase	0.0750361	0.140118
Dihydroorotase	-0.0624254	0.219873
Dihydroorotate dehydrogenase	-0.0817113	0.10805
Dihydroorotate dehydrogenase (quinone)	0.0306973	0.546604
Dihydroorotate dehydrogenase B (NAD(+)), electron transfer subunit	-0.0832121	0.101706
Dihydroxy-acid dehydratase	-0.157042	0.00191788
Dimethylamine corrinoid protein	-0.0349174	0.49285
Dipeptide and tripeptide permease A	0.0760437	0.134857
Dipeptide and tripeptide permease B	0.0757281	0.136488
Dipeptide permease D	0.088743	0.0808388
Diphosphomevalonate decarboxylase	0.042104	0.408212
Disulfide bond formation protein B	0.0516412	0.310292
dITP/XTP pyrophosphatase	-0.1027	0.043199
Ditrans,polycis-undecaprenyl-diphosphate synthase ((2E,6E)-farnesyl-diphosphate specific)	-0.0621772	0.221715
Divalent metal cation transporter MntH	-0.00108749	0.982965
Divalent-cation tolerance protein CutA	0.0936654	0.065315
DNA double-strand break repair protein Mre11	-0.12502	0.0137265
DNA double-strand break repair Rad50 ATPase	-0.0989968	0.0513543
DNA gyrase inhibitor	0.0971018	0.0560006
DNA gyrase inhibitor YacG	-0.0386191	0.44813
DNA gyrase subunit A	-0.108668	0.0323585
DNA gyrase subunit B	-0.0711909	0.161648
DNA integrity scanning protein DisA	-0.0134955	0.791022
DNA ligase	-0.0711337	0.161986
DNA mismatch repair protein MutH	-0.0303161	0.551597
DNA mismatch repair protein MutL	-0.105592	0.0376157
DNA mismatch repair protein MutS	-0.0856045	0.0922079
DNA polymerase 1	0.086346	0.0894127
DNA polymerase III PolC-type	-0.120154	0.0178989
DNA polymerase IV	-0.0837971	0.0993147
DNA primase	-0.0468659	0.357218
DNA protection during starvation protein	0.0912233	0.0726796
DNA repair protein RadA	-0.0908072	0.0739994
DNA repair protein RecO	-0.102357	0.0439051
DNA replication and repair protein RecF	-0.103076	0.0424352
DNA replication terminus site-binding protein	0.129981	0.0103784
DNA topoisomerase 1	-0.0734614	0.148653
DNA topoisomerase 3	-0.136674	0.00701471
DNA topoisomerase 4 subunit A	-0.0367898	0.469938
DNA topoisomerase 6 subunit B	-0.0135053	0.790872
DNA-binding protein Fis	0.0430893	0.397321
DNA-binding protein HTa	-0.0639389	0.208872
DNA-directed RNA polymerase subunit A''	0.0436508	0.391193
DNA-directed RNA polymerase subunit alpha	-0.036458	0.473954
DNA-directed RNA polymerase subunit B'	-0.0409495	0.421197
DNA-directed RNA polymerase subunit beta	-0.093057	0.06709
DNA-directed RNA polymerase subunit beta'	-0.0661422	0.193576
DNA-directed RNA polymerase subunit delta	-0.0423961	0.404965
DNA-directed RNA polymerase subunit omega	-0.0620473	0.222684
DnaA initiator-associating protein DiaA	0.0670151	0.187749
DnaA regulatory inactivator Hda	0.0075375	0.882347
Dolichyl N-acetyl-alpha-D-glucosaminyl phosphate 3-beta-D-2,3-diacetamido-2,3-dideoxy-beta-D-glucuronosyltransferase	-0.110276	0.0298705
dTDP-4-amino-4,6-dideoxygalactose transaminase	-0.0992146	0.0508414
dTDP-4-dehydrorhamnose 3,5-epimerase	-0.107769	0.0338255
dTDP-fucosamine acetyltransferase	0.101937	0.044785
dTTP/UTP pyrophosphatase	-0.0813988	0.109409
Dual-specificity RNA methyltransferase RlmN	-0.0948198	0.0620534
ECA polysaccharide chain length modulation protein	0.11456	0.0240248
Ecotin	0.0991978	0.0508808
Elongation factor 1-alpha	0.0216797	0.670318
Elongation factor 2	-0.0259457	0.610396
Elongation factor 4	-0.0729207	0.151673
Elongation factor G	-0.0409322	0.421393
Elongation factor G, mitochondrial	-0.142484	0.00492469
Elongation factor P	-0.0318035	0.532239
Elongation factor P--(R)-beta-lysine ligase	0.0547047	0.282426
Elongation factor P-like protein	0.0794479	0.118202
Elongation factor Ts, mitochondrial	-0.0417671	0.411977
Elongation factor Tu	-0.0400715	0.431232
Endo-type membrane-bound lytic murein transglycosylase A	0.0558674	0.272306
Endolytic murein transglycosylase	-0.111025	0.0287677
Endolytic peptidoglycan transglycosylase RlpA	0.00802001	0.874876
endonuclease 4	-0.087647	0.0846728
Endonuclease 8	0.119574	0.0184632
Endonuclease III	-0.14011	0.00569932
Endonuclease MutS2	-0.0584453	0.25076
Endonuclease NucS	-0.0437997	0.389578
Endonuclease V	0.0659575	0.194827
Endoribonuclease SymE	0.0557193	0.273582
Endoribonuclease YbeY	-0.0748832	0.14093
Energy-coupling factor transporter transmembrane protein EcfT	-0.0262091	0.606775
Enolase	-0.150787	0.00290502
Enterobactin exporter EntS	0.0892246	0.079199
Epoxyqueuosine reductase	0.106857	0.0353717
Epoxyqueuosine reductase QueH	-0.13398	0.0082294
Error-prone DNA polymerase	-0.141298	0.00529915
Erythronate-4-phosphate dehydrogenase	-0.0919029	0.0705652
Esterase FrsA	0.0571872	0.261122
Ethanolamine ammonia-lyase light chain	0.0744697	0.143144
Exodeoxyribonuclease 7 large subunit	-0.0982336	0.0531854
Exodeoxyribonuclease 7 small subunit	-0.0906009	0.0746611
Exoribonuclease 2	-0.0131506	0.796243
Exosome complex component Rrp41	-0.007679	0.880155
F(420)H(2) dehydrogenase subunit A	0.0209152	0.681294
F(420)H(2) dehydrogenase subunit B	0.0181061	0.722195
F(420)H(2) dehydrogenase subunit D	0.0948362	0.0620082
F(420)H(2) dehydrogenase subunit F	-0.0997148	0.0496799
F(420)H(2) dehydrogenase subunit H	0.0762255	0.133924
F(420)H(2) dehydrogenase subunit I	0.0610171	0.230475
F(420)H(2) dehydrogenase subunit J	0.0774724	0.12766
F(420)H(2) dehydrogenase subunit K	0.0909174	0.0736483
F(420)H(2) dehydrogenase subunit L	0.0836143	0.100057
F(420)H(2) dehydrogenase subunit M	0.0630745	0.215105
F(420)H(2) dehydrogenase subunit N	0.104186	0.040248
F420-dependent glucose-6-phosphate dehydrogenase	0.0429079	0.399313
F420-non-reducing hydrogenase vhc iron-sulfur subunit D	-0.0976956	0.0545087
FAD synthase	0.0302993	0.551819
Fatty acid metabolism regulator protein	-0.0167459	0.742296
Fatty acid oxidation complex subunit alpha	-0.0120854	0.812428
Fe(2+) transporter FeoB	-0.0786183	0.122105
Fe(2+)-trafficking protein	-0.0294287	0.563309
Fe/S biogenesis protein NfuA	0.0133133	0.793779
FeMo cofactor biosynthesis protein NifB	-0.011044	0.828328
Ferredoxin	-0.0763122	0.133481
Ferredoxin--NADP reductase	-0.0654295	0.198432
Ferredoxin-type protein NapF	-0.0341082	0.502934
Ferric-chelate reductase (NAD(P)H)	-0.0317588	0.532815
Ferrochelatase	-0.0238484	0.639564
Ferrous-iron efflux pump FieF	-0.0654373	0.198378
FKBP-type peptidyl-prolyl cis-trans isomerase	-0.181265	0.000332248
Flagellar assembly factor FliW	-0.218098	1.46112e-05
Flagellar brake protein YcgR	-0.152899	0.00252918
Flagellar hook-basal body complex protein FliE	-0.171204	0.000707927
Flagellar L-ring protein	0.120204	0.0178512
Flagellar P-ring protein	0.117006	0.0211536
Flagellar protein FliT	0.116211	0.0220527
Flagellar transcriptional regulator FlhC	0.131607	0.00945084
Flap endonuclease Xni	-0.0897378	0.0774813
Flavin prenyltransferase PAD1, mitochondrial	0.0456689	0.369645
Flavin-dependent thymidylate synthase	-0.113397	0.0255048
Flavohemoprotein	0.0611699	0.229307
FMN reductase (NADH) RutF	-0.0266886	0.600208
FMN-dependent NADH-azoreductase	-0.00449715	0.92964
Foldase protein PrsA	-0.0816601	0.108271
Formamidase	0.00783534	0.877734
Formamidopyrimidine-DNA glycosylase	0.0784645	0.122839
Formate dehydrogenase subunit alpha	-0.0305903	0.548003
Formate dehydrogenase, mitochondrial	-0.123826	0.0146621
Formate--tetrahydrofolate ligase	-0.108439	0.0327271
Formate-dependent phosphoribosylglycinamide formyltransferase	-0.0780381	0.124893
Formimidoylglutamase	0.117797	0.0202905
Formyl-CoA:oxalate CoA-transferase	0.0403638	0.427876
Formyltetrahydrofolate deformylase	-0.0305826	0.548103
Fructose-1,6-bisphosphatase	-0.0356568	0.483731
Fructose-1,6-bisphosphatase class 1	-0.00286129	0.955199
Fructose-1,6-bisphosphatase class 3	-0.116466	0.02176
Fructose-1,6-bisphosphatase/inositol-1-monophosphatase	0.0648231	0.202632
Fructose-bisphosphate aldolase class 1	0.132623	0.00890969
Fructose-bisphosphate aldolase class 2	0.0308246	0.54494
Fructose-bisphosphate aldolase/6-deoxy-5-ketofructose 1-phosphate synthase	0.0217677	0.669058
Fumarate hydratase class II	-0.0294759	0.562683
Fumarate reductase (CoM/CoB) subunit A	-0.129205	0.0108493
Fumarate reductase (CoM/CoB) subunit B	0.0548926	0.280773
Fumarate reductase subunit C	0.0274369	0.590024
Fumarate reductase subunit D	0.0848665	0.0950587
Fused isobutyryl-CoA mutase	0.0506411	0.319768
Futalosine hydrolase	-0.00331351	0.948128
G/T mismatches repair enzyme	-0.0651712	0.200214
G/U mismatch-specific DNA glycosylase	0.08848	0.0817456
Galactokinase	-0.141034	0.00538561
Galactose-1-phosphate uridylyltransferase	-0.144904	0.00423394
Galactose-6-phosphate isomerase subunit LacA	-0.0174638	0.731664
Galactose-6-phosphate isomerase subunit LacB	-0.0598156	0.239802
Gamma-glutamyl phosphate reductase	-0.105728	0.0373687
Gamma-glutamyl-hercynylcysteine sulfoxide hydrolase	-0.0205512	0.686544
GDP-L-fucose synthase	-0.0922195	0.0695977
GDP-mannose 4,6-dehydratase	-0.0776022	0.127021
GDP-mannose mannosyl hydrolase	0.0302882	0.551963
Geranylgeranyl diphosphate synthase	-0.195005	0.000110661
Germination protease	-0.14351	0.00462034
GlcNAc-binding protein A	0.113457	0.025427
Glucans biosynthesis glucosyltransferase H	0.0521154	0.305864
Glucans biosynthesis protein C	-0.0267125	0.599881
Glucans biosynthesis protein D	0.0960414	0.0587495
Glucans biosynthesis protein G	0.0207397	0.683824
Glucokinase	0.0786096	0.122146
Gluconeogenesis factor	-0.00816885	0.872573
Glucosamine-6-phosphate deaminase	-0.0199867	0.694717
Glucose import ATP-binding protein GlcV	-0.0668697	0.188711
Glucose import system permease protein GlcU	-0.00875047	0.863586
Glucose-1-phosphate adenylyltransferase	-0.106328	0.036296
Glucose-6-phosphate 1-dehydrogenase	0.0734863	0.148515
Glucose-6-phosphate isomerase	-0.0646982	0.203506
Glucosyl-3-phosphoglycerate/mannosyl-3-phosphoglycerate phosphatase	0.0797953	0.116597
Glucosyltransferase 3	-0.124498	0.0141292
Glutamate 5-kinase	-0.143652	0.00457973
Glutamate dehydrogenase	0.0563508	0.268172
Glutamate formimidoyltransferase	0.194649	0.000113975
Glutamate mutase epsilon subunit	0.278171	2.51822e-08
Glutamate mutase sigma subunit	-0.0452896	0.373638
Glutamate N-acetyltransferase	-0.145406	0.00410232
Glutamate racemase	-0.0831698	0.101881
Glutamate transporter	-0.110115	0.0301122
Glutamate--cysteine ligase	0.0842208	0.0976106
Glutamate--LysW ligase ArgX	-0.0678989	0.181981
Glutamate--tRNA ligase	-0.0756949	0.136661
Glutamate-1-semialdehyde 2,1-aminomutase	-0.0759597	0.13529
Glutaminase	0.0806579	0.112686
Glutamine synthetase	-0.107962	0.0335062
Glutamine--fructose-6-phosphate aminotransferase [isomerizing]	-0.115806	0.0225228
Glutamine-dependent NAD(+) synthetase	-0.116694	0.0215023
Glutamyl-Q tRNA(Asp) synthetase	-0.100807	0.0472203
Glutamyl-tRNA reductase	-0.174667	0.000548171
Glutamyl-tRNA(Gln) amidotransferase subunit A, chloroplastic/mitochondrial	-0.0680733	0.180859
Glutamyl-tRNA(Gln) amidotransferase subunit B, chloroplastic/mitochondrial	-0.0544675	0.284521
Glutamyl-tRNA(Gln) amidotransferase subunit D	-0.0271414	0.594036
Glutarate 2-hydroxylase	0.0668841	0.188616
Glutathione biosynthesis bifunctional protein GshAB	-0.079427	0.118299
Glutathione synthetase	-0.052686	0.300592
Glutathione-regulated potassium-efflux system ancillary protein KefF	0.0512503	0.313974
Glutathione-regulated potassium-efflux system ancillary protein KefG	0.0233885	0.646035
Glutathione-regulated potassium-efflux system protein KefB	-0.0382525	0.452454
Glutathione-regulated potassium-efflux system protein KefC	-0.0802602	0.114476
Glyceraldehyde 3-phosphate phosphatase	-0.0868009	0.0877316
Glyceraldehyde dehydrogenase large chain	-0.0815484	0.108757
Glyceraldehyde dehydrogenase medium chain	-0.0670188	0.187725
Glyceraldehyde dehydrogenase small chain	-0.0835445	0.100342
Glycerate 2-kinase	-0.130233	0.0102299
Glycerol kinase	-0.040825	0.422612
Glycerol-1-phosphate dehydrogenase [NAD(P)+]	-0.101131	0.046511
Glycerol-3-phosphate acyltransferase	-0.095246	0.0608838
Glycerol-3-phosphate dehydrogenase [NAD(P)+]	-0.108985	0.0318547
Glycine cleavage system H protein	0.105432	0.0379067
Glycine dehydrogenase (decarboxylating)	0.0891232	0.0795419
glycine dehydrogenase (decarboxylating) subunit 1	0.1905	0.000160052
glycine dehydrogenase (decarboxylating) subunit 2	0.21483	1.97293e-05
Glycine/sarcosine/betaine reductase complex component A	0.177428	0.000445503
Glycogen debranching enzyme	-0.198809	8.05118e-05
Glycogen synthase	-0.100384	0.0481614
Glycosyltransferase AglD	-0.170973	0.000719994
Glycosyltransferase AglE	-0.0742862	0.144135
Glycosyltransferase AglI	-0.0707728	0.164132
Glycosyltransferase AglJ	-0.118572	0.0194755
Glyoxylate reductase	-0.0449898	0.376813
Glyoxylate/hydroxypyruvate reductase A	-0.0020442	0.967984
Glyoxylate/hydroxypyruvate reductase B	-0.0602425	0.236458
GMP reductase	0.0292894	0.565159
GMP synthase [glutamine-hydrolyzing] subunit A	-0.0780281	0.124942
GMP synthase [glutamine-hydrolyzing] subunit B	-0.00334795	0.947589
GTP 3',8-cyclase	-0.128467	0.0113138
GTP cyclohydrolase 1	-0.106012	0.0368577
GTP cyclohydrolase 1 type 2	-0.0575162	0.258385
GTP cyclohydrolase MptA	0.0511531	0.314893
GTP cyclohydrolase-2	0.0678372	0.18238
GTP-binding protein EngB	-0.0739445	0.145994
GTP-sensing transcriptional pleiotropic repressor CodY	-0.148972	0.00326763
GTPase Der	-0.0890323	0.0798504
GTPase Era	-0.0666007	0.190499
GTPase HflX	-0.0776278	0.126895
GTPase Obg	-0.0660989	0.193869
Guanosine-5'-triphosphate,3'-diphosphate pyrophosphatase	-0.119935	0.0181105
Guanylate kinase	-0.116514	0.0217061
H(+)/Cl(-) exchange transporter ClcA	-0.0382156	0.45289
H(2):CoB-CoM heterodisulfide,ferredoxin reductase subunit A	-0.0692838	0.173209
H(2):CoB-CoM heterodisulfide,ferredoxin reductase subunit B	-0.0234811	0.64473
H(2)/formate:CoB-CoM heterodisulfide,ferredoxin reductase subunit A	0.0101939	0.84136
H(2)/formate:CoB-CoM heterodisulfide,ferredoxin reductase subunit B2	-0.0727312	0.152743
Haloalkane dehalogenase	-0.140142	0.00568816
Halolysin	-0.0511436	0.314984
Hdr-like menaquinol oxidoreductase cytochrome b-like subunit	0.0262729	0.605899
Hdr-like menaquinol oxidoreductase cytochrome c subunit	-0.0320168	0.52949
Hdr-like menaquinol oxidoreductase iron-sulfur subunit 1	-0.00562172	0.912109
Hdr-like menaquinol oxidoreductase iron-sulfur subunit 2	0.0113515	0.823626
Heat shock protein HspQ	0.11949	0.0185462
Heat-inducible transcription repressor HrcA	-0.0965436	0.0574341
Hercynine oxygenase	0.102648	0.0433059
hercynylcysteine sulfoxide lyase	-0.119898	0.0181462
Heterodisulfide reductase subunit C-like protein	-0.00984646	0.846699
High frequency lysogenization protein HflD	0.0613196	0.228167
Histidine ammonia-lyase	0.127174	0.0121714
Histidine biosynthesis bifunctional protein HisB	-0.00721401	0.887362
Histidine biosynthesis bifunctional protein HisIE	-0.0611584	0.229395
Histidine decarboxylase	0.115975	0.0223248
Histidine--tRNA ligase	-0.104855	0.0389762
Histidinol dehydrogenase	-0.15565	0.00210628
Histidinol-phosphate aminotransferase	-0.13929	0.00599128
HMP-PP phosphatase	-0.125214	0.0135799
Holin-like protein CidA	-0.0192166	0.705924
Holliday junction ATP-dependent DNA helicase RuvA	-0.0789228	0.120661
Holliday junction ATP-dependent DNA helicase RuvB	-0.106311	0.0363264
Holliday junction resolvase RecU	-0.154012	0.00234954
Homoisocitrate dehydrogenase	-0.0486151	0.339536
Homoserine kinase	-0.1256	0.0132912
Homoserine O-acetyltransferase	-0.126653	0.0125327
HPr kinase/phosphorylase	-0.102465	0.0436831
HTH-type sugar sensing transcriptional regulator TrmBL1	-0.001595	0.975017
HTH-type transcriptional activator RhaR	-0.0631481	0.214569
HTH-type transcriptional activator RhaS	-0.0909936	0.0734059
HTH-type transcriptional regulator ArgP	0.0356922	0.483297
HTH-type transcriptional regulator BetI	0.0134672	0.791449
HTH-type transcriptional regulator GlpR	-0.0523392	0.303789
HTH-type transcriptional regulator HdfR	-0.0908241	0.0739455
HTH-type transcriptional regulator Hpr	-0.0746651	0.142094
HTH-type transcriptional regulator IscR	-0.113974	0.0247619
HTH-type transcriptional regulator LrpA	-0.156101	0.00204345
HTH-type transcriptional regulator MalT	-0.104402	0.0398349
HTH-type transcriptional regulator MntR	-0.0104294	0.837746
HTH-type transcriptional regulator MurR	-0.0358062	0.481899
HTH-type transcriptional regulator Ptr1	-0.146152	0.00391325
HTH-type transcriptional regulator Ptr2	-0.0751112	0.139721
HTH-type transcriptional regulator SgrR	0.050076	0.325205
HTH-type transcriptional regulator UlaR	-0.0529029	0.298604
HTH-type transcriptional regulator YidZ	-0.0412717	0.417549
HTH-type transcriptional repressor FabR	0.0964528	0.0576699
HTH-type transcriptional repressor NanR	-0.0118392	0.816181
HTH-type transcriptional repressor NsrR	0.0916906	0.0712202
HTH-type transcriptional repressor PurR	-0.130501	0.0100738
Hydrogenase maturation factor HybF	-0.026834	0.598223
Hydrogenase maturation factor HypA	-0.0213282	0.675355
Hydrogenobyrinate a,c-diamide synthase	-0.0591198	0.245323
Hydroxyacylglutathione hydrolase	-0.0492599	0.333162
Hydroxyethylthiazole kinase	-0.207794	3.70774e-05
Hydroxylamine reductase	-0.140121	0.00569573
hypothetical protein	-0.0427633	0.400906
Hypoxanthine DNA glycosylase	-0.160478	0.0015169
Hypoxanthine/guanine phosphoribosyltransferase	-0.120376	0.0176866
Imidazole glycerol phosphate synthase subunit HisF	-0.164427	0.00115186
Imidazole glycerol phosphate synthase subunit HisH	-0.133026	0.00870271
Imidazoleglycerol-phosphate dehydratase	-0.153506	0.00242974
Imidazolonepropionase	0.0549117	0.280606
Indole-3-glycerol phosphate synthase	-0.186399	0.000222327
Indolepyruvate oxidoreductase subunit IorA	0.0183304	0.718898
Indolepyruvate oxidoreductase subunit IorB	0.000202365	0.99683
Inhibitor of hydrogen peroxide resistance	0.0941136	0.0640325
Initiation-control protein YabA	0.0335174	0.510364
Inorganic pyrophosphatase	0.0370926	0.466287
Inosine-5'-monophosphate dehydrogenase	-0.0616441	0.22571
Inosine/xanthosine triphosphatase	-0.0146061	0.774271
Inositol 2-dehydrogenase/D-chiro-inositol 3-dehydrogenase	0.0445118	0.381908
Inosose dehydratase	0.032096	0.528472
Integration host factor subunit alpha	0.0442389	0.384837
Integration host factor subunit beta	0.0274222	0.590222
intracellular septation protein A	-0.0497791	0.328086
Ion-translocating oxidoreductase complex subunit A	-0.028082	0.581308
Ion-translocating oxidoreductase complex subunit B	-0.0186618	0.714037
Ion-translocating oxidoreductase complex subunit C	-0.0534054	0.294031
Ion-translocating oxidoreductase complex subunit D	-0.022083	0.664554
Ion-translocating oxidoreductase complex subunit E	-0.0325151	0.5231
Ion-translocating oxidoreductase complex subunit G	-0.101969	0.0447165
Iron-binding protein IscA	0.0160795	0.75221
Iron-sulfur cluster assembly protein CyaY	0.0340093	0.504173
Iron-sulfur cluster assembly scaffold protein IscU 2	-0.0695247	0.171715
Iron-sulfur cluster carrier protein	-0.102272	0.0440823
Iron-sulfur cluster insertion protein ErpA	-0.0344862	0.49821
Iron-sulfur cluster repair protein ScdA	0.00129087	0.97978
Iron-sulfur cluster repair protein YtfE	0.0170732	0.737442
Iron-sulfur flavoprotein	-0.0675207	0.184433
Isochorismate synthase MenF	-0.00507357	0.920649
Isocitrate dehydrogenase [NADP]	-0.0046882	0.926659
Isocitrate dehydrogenase kinase/phosphatase	0.108975	0.0318707
Isocitrate lyase	0.0459139	0.36708
Isoleucine--tRNA ligase	-0.0619314	0.223551
Isopentenyl phosphate kinase	-0.0912808	0.0724988
Isopentenyl-diphosphate delta-isomerase	0.0600995	0.237574
Isopentenyl-diphosphate Delta-isomerase.1	-0.192908	0.000131543
Isopropylmalate/citramalate isomerase large subunit	-0.175512	0.000514634
Isopropylmalate/citramalate isomerase small subunit	-0.182934	0.000291913
K(+)-insensitive pyrophosphate-energized proton pump	-0.0296607	0.560236
K(+)-stimulated pyrophosphate-energized sodium pump	0.0781023	0.124582
K(+)/H(+) antiporter NhaP2	-0.00311712	0.951198
Ketoisovalerate oxidoreductase subunit VorA	0.134913	0.00778918
Ketoisovalerate oxidoreductase subunit VorB	0.072929	0.151627
Ketoisovalerate oxidoreductase subunit VorC	0.172055	0.000665112
Ketoisovalerate oxidoreductase subunit VorD	0.0591485	0.245094
Ketol-acid reductoisomerase (NAD(+))	-0.0067579	0.894441
Ketol-acid reductoisomerase (NAD(P)(+))	-0.132499	0.00897405
Ketol-acid reductoisomerase (NADP(+))	-0.054859	0.281068
Kynurenine 3-monooxygenase	0.151004	0.00286417
Kynurenine formamidase	0.0399424	0.432718
L-2-hydroxycarboxylate dehydrogenase (NAD(P)(+))	-0.0140228	0.783055
L-2-hydroxyglutarate dehydrogenase	-0.047949	0.346203
L-alanine exporter AlaE	0.106485	0.0360188
L-arabinose isomerase	-0.14305	0.00475476
L-ascorbate-6-phosphate lactonase UlaG	0.0612016	0.229066
L-aspartate dehydrogenase	-0.0224892	0.65877
L-aspartate/L-glutamate decarboxylase	0.121465	0.0166781
L-carnitine CoA-transferase	0.0748066	0.141338
L-carnitine dehydrogenase	0.045195	0.374638
L-carnitine/gamma-butyrobetaine antiporter	-0.0103138	0.83952
L-cysteine desulfidase	0.00664546	0.896187
L-fucose isomerase	-0.0017948	0.971889
L-fucose mutarotase	0.064776	0.202961
L-fuculose phosphate aldolase	-0.010676	0.833964
L-lactate dehydrogenase	-0.0876956	0.0844996
L-lysine 2,3-aminomutase	0.229867	4.77011e-06
L-malyl-CoA/beta-methylmalyl-CoA lyase	0.0720776	0.156475
L-rhamnonate dehydratase	0.0262568	0.60612
L-rhamnose 1-dehydrogenase (NADP(+))	-0.0476217	0.349509
L-rhamnose isomerase	-0.0120766	0.812562
L-rhamnose mutarotase	-0.05027	0.323332
L-rhamnose-proton symporter	0.0283095	0.578249
L-ribulose-5-phosphate 3-epimerase UlaE	0.0747128	0.141839
L-ribulose-5-phosphate 4-epimerase	-0.0494223	0.331569
L-seryl-tRNA(Sec) selenium transferase	0.0742082	0.144557
L-sulfolactate dehydrogenase	0.0101865	0.841473
L-threonine 3-dehydrogenase	0.0439401	0.388058
Laccase	0.0746693	0.142072
Lactaldehyde dehydrogenase	0.102811	0.0429733
Lactate utilization protein A	0.0227414	0.655188
Lactate utilization protein B	-0.00781159	0.878101
Lactate utilization protein C	0.0269739	0.596315
Large-conductance mechanosensitive channel	-0.0454653	0.371785
Large-conductance mechanosensitive channel MscMJLR	0.043482	0.393029
Leucine--tRNA ligase	-0.128324	0.0114064
Leucyl/phenylalanyl-tRNA--protein transferase	0.0645088	0.204835
LexA repressor	-0.0559291	0.271776
Light-independent protochlorophyllide reductase iron-sulfur ATP-binding protein	-0.106939	0.0352312
Light-independent protochlorophyllide reductase subunit B	-0.0833858	0.100991
Lipid A 1-diphosphate synthase	-0.011472	0.821784
Lipid A biosynthesis lauroyltransferase	0.0224304	0.659605
Lipid A biosynthesis myristoyltransferase	0.0804503	0.113618
Lipid A biosynthesis palmitoleoyltransferase	0.093515	0.0657503
Lipid A palmitoyltransferase PagP	-0.009789	0.847583
lipid II flippase MurJ	-0.160065	0.00156065
Lipid II isoglutaminyl synthase (glutamine-hydrolyzing) subunit GatD	-0.0802106	0.114701
Lipid II isoglutaminyl synthase (glutamine-hydrolyzing) subunit MurT	-0.0576307	0.257436
Lipid III flippase	0.130854	0.00987089
lipid kinase YegS	-0.0578191	0.255881
Lipid-A-disaccharide synthase	0.0174648	0.731649
Lipoate-protein ligase A	0.175523	0.000514215
Lipoate-protein ligase A subunit 1	0.111191	0.0285285
Lipopolysaccharide assembly protein A	0.0503766	0.322306
Lipopolysaccharide assembly protein B	-0.000645661	0.989885
Lipopolysaccharide core heptose(II)-phosphate phosphatase	0.0723148	0.155113
Lipopolysaccharide export system protein LptA	-0.0261344	0.607801
Lipopolysaccharide export system protein LptC	0.031892	0.531097
Lipoprotein LpqB	0.0244358	0.631335
Lipoprotein signal peptidase	-0.0781205	0.124495
Lipoyl synthase, organellar chromatophore	0.0749428	0.140613
LL-diaminopimelate aminotransferase	-0.120694	0.0173871
Lon protease	-0.132742	0.00884788
Low affinity potassium transport system protein kup	0.0117459	0.817604
LPS-assembly lipoprotein LptE	-0.0370694	0.466566
LPS-assembly protein LptD	0.04435	0.383643
Lysophospholipid transporter LplT	0.0975483	0.0548756
Lysyl aminopeptidase	0.0571747	0.261227
M18 family aminopeptidase 1	-0.118804	0.0192363
M18 family aminopeptidase 2	-0.183361	0.000282349
Macrodomain Ter protein	0.065406	0.198594
Major outer membrane lipoprotein Lpp	0.0778157	0.125975
Malate dehydrogenase	-0.0601817	0.236933
Malate synthase G	0.0909238	0.0736277
malate:quinone oxidoreductase	0.0673662	0.185442
Malate/(S)-sulfolactate dehydrogenase	0.0518784	0.308072
Malonate decarboxylase acyl carrier protein	0.121632	0.0165273
Malonate-semialdehyde dehydrogenase	-0.00403134	0.936912
malonic semialdehyde reductase RutE	0.00150226	0.976469
Malonyl CoA reductase (NADP)	-0.110553	0.0294585
Malto-oligosyltrehalose trehalohydrolase	-0.0508458	0.317814
Maltodextrin phosphorylase	-0.0115828	0.820092
Maltoporin	0.0721139	0.156266
Maltotriose-binding protein	-0.0317026	0.533541
manganese efflux pump MntP	-0.097529	0.0549239
manganese-dependent inorganic pyrophosphatase	-0.15417	0.00232507
Manganese-dependent inorganic pyrophosphatase.1	-0.136639	0.00702962
Mannitol-1-phosphate 5-dehydrogenase	0.0106833	0.833852
Mannonate dehydratase	-0.095229	0.06093
Mannosyl-3-phosphoglycerate phosphatase	-0.00264109	0.958644
Membrane protein insertase YidC	-0.0601929	0.236845
Membrane-bound hydrogenase subunit alpha	0.0672868	0.185962
Membrane-bound lytic murein transglycosylase C	-0.0295082	0.562256
Membrane-bound lytic murein transglycosylase F	-0.129158	0.0108782
Membrane-bound protease	0.148154	0.00344412
Met repressor	0.0464139	0.36188
Metallothiol transferase FosB	0.00320785	0.94978
Methanogen homoaconitase large subunit	-0.118781	0.0192607
Methanogen homoaconitase small subunit	-0.0920664	0.070064
Methanogenesis regulatory histidine kinase FilI	-0.0488386	0.337318
Methenyltetrahydromethanopterin cyclohydrolase	0.12919	0.0108586
Methionine aminopeptidase	-0.0435625	0.392153
Methionine aminopeptidase 1, mitochondrial	-0.0946409	0.0625499
Methionine synthase	0.0045465	0.92887
Methionine--tRNA ligase	-0.0709041	0.163349
Methionyl-tRNA formyltransferase	-0.0985343	0.0524575
Methyl sulfide methyltransferase-associated sensor	-0.0475415	0.350321
Methylated-DNA--protein-cysteine methyltransferase	-0.0398346	0.433963
Methylated-thiol--coenzyme M methyltransferase	0.0609866	0.230708
Methylcobamide:CoM methyltransferase MtbA	0.0945691	0.0627501
Methylenetetrahydrofolate--tRNA-(uracil-5-)-methyltransferase TrmFO	-0.0387087	0.447077
Methylglyoxal synthase	-0.111234	0.028467
Methylmalonyl-CoA epimerase	0.11795	0.0201276
Methylthioribose kinase	0.0317415	0.533039
Methylthioribose-1-phosphate isomerase	0.0683034	0.179386
Methylthioribulose-1-phosphate dehydratase	-0.029897	0.557114
Mid-cell-anchored protein Z	0.0414671	0.415346
Mini-ribonuclease 3	-0.108953	0.0319056
Modification methylase MjaI	0.0204529	0.687965
Modification methylase MjaV	-0.0217074	0.669921
Modification methylase MthTI	-0.0915605	0.0716243
Modification methylase MwoI	0.0130766	0.797365
Modulator protein MzrA	0.0889716	0.0800571
Molybdate/tungstate import ATP-binding protein WtpC	-0.0390349	0.443254
Molybdate/tungstate transport system permease protein WtpB	-0.146105	0.00392489
Molybdate/tungstate-binding protein WtpA	0.12919	0.0108586
Molybdenum cofactor guanylyltransferase	-0.13287	0.00878237
Molybdopterin adenylyltransferase	-0.0887794	0.0807139
Monofunctional glycosyltransferase	-0.00324562	0.949189
Multidrug resistance protein MdtA	0.0188798	0.710845
Multidrug resistance protein MdtB	0.021703	0.669984
Multidrug resistance protein MdtC	0.00638696	0.900204
Multidrug resistance protein MdtG	0.00906437	0.858743
Multidrug resistance protein MdtH	0.0422337	0.406768
Multidrug resistance protein MdtK	-0.129095	0.0109172
Multidrug resistance protein MdtL	0.0461728	0.364381
Multifunctional CCA protein	-0.0264055	0.604082
Murein peptide amidase A	0.0441335	0.385971
Mycothiol acetyltransferase	-0.00543508	0.915016
N-(5'-phosphoribosyl)anthranilate isomerase	-0.197103	9.29282e-05
N-acetyl-D-glucosamine kinase	-0.130326	0.0101751
N-acetyl-gamma-glutamyl-phosphate reductase	-0.0882354	0.0825964
N-acetyldiaminopimelate deacetylase	-0.0256517	0.614449
N-acetylglucosaminyldiphosphoundecaprenol N-acetyl-beta-D-mannosaminyltransferase	-0.133705	0.00836317
N-acetylmannosamine kinase	-0.0408423	0.422415
N-acetylmuramic acid 6-phosphate etherase	0.0833477	0.101148
N-acetylneuraminate epimerase	0.135807	0.00738705
N-acetylneuraminate lyase	0.0929217	0.0674899
N-acetyltransferase Eis	-0.00368799	0.942275
N-alpha-acetyltransferase	-0.056239	0.269125
N-glycosylase/DNA lyase	0.0322472	0.52653
N-methyl-L-tryptophan oxidase	0.0593768	0.243274
N-succinylarginine dihydrolase	0.0919895	0.0702996
N-succinylglutamate 5-semialdehyde dehydrogenase	0.0442713	0.384488
N(1)-aminopropylagmatine ureohydrolase	-0.0132197	0.795196
N(4)-bis(aminopropyl)spermidine synthase	0.0393424	0.439668
N5-carboxyaminoimidazole ribonucleotide mutase	-0.110227	0.0299438
N5-carboxyaminoimidazole ribonucleotide synthase	-0.0624465	0.219716
Na(+)-translocating NADH-quinone reductase subunit A	0.0773522	0.128253
Na(+)-translocating NADH-quinone reductase subunit B	0.0689268	0.175439
Na(+)-translocating NADH-quinone reductase subunit C	0.0646644	0.203742
Na(+)-translocating NADH-quinone reductase subunit E	0.0585892	0.249592
Na(+)-translocating NADH-quinone reductase subunit F	-0.00212406	0.966734
Na(+)/H(+) antiporter 1	-0.138777	0.00618085
Na(+)/H(+) antiporter NhaA	0.00270116	0.957704
Na(+)/H(+) antiporter NhaB	-0.183156	0.000286918
NAD kinase	-0.0679497	0.181654
NAD-dependent alcohol dehydrogenase	-0.0104945	0.836747
NAD-dependent malic enzyme	-0.119009	0.0190285
NAD-dependent protein deacetylase	-0.114908	0.023597
NAD-dependent protein deacylase 1	0.00826652	0.871063
NAD-dependent protein deacylase 2	-0.157031	0.00191933
NAD-dependent protein deacylase sirtuin-5, mitochondrial	0.157564	0.00185129
NAD-specific glutamate dehydrogenase A	-0.126697	0.0125014
NAD(P)H dehydrogenase (quinone)	-0.0487022	0.338671
NAD(P)H-hydrate epimerase	-0.196614	9.68035e-05
NAD(P)H-quinone oxidoreductase chain 4	-0.0758524	0.135844
NAD(P)H-quinone oxidoreductase subunit 1, chloroplastic	0.0408457	0.422376
NAD(P)H-quinone oxidoreductase subunit 2, chloroplastic	0.104039	0.0405317
NAD(P)H-quinone oxidoreductase subunit 3, chloroplastic	0.145307	0.00412785
NAD(P)H-quinone oxidoreductase subunit 4L, chloroplastic	0.107512	0.034256
NAD(P)H-quinone oxidoreductase subunit H, chloroplastic	-0.0132052	0.795415
NAD(P)H-quinone oxidoreductase subunit I, chloroplastic	0.00353848	0.944611
NAD(P)H-quinone oxidoreductase subunit K, chloroplastic	0.0572724	0.260411
NAD/NADP-dependent betaine aldehyde dehydrogenase	-0.0155131	0.760667
NADH pyrophosphatase	-0.105147	0.0384315
NADH-quinone oxidoreductase subunit C/D	0.0244684	0.63088
NADP-specific glutamate dehydrogenase A1	-0.0379579	0.455946
NADPH dehydrogenase	-0.00720376	0.887521
NADPH-dependent 7-cyano-7-deazaguanine reductase	-0.118772	0.0192697
Negative modulator of initiation of replication	0.0447896	0.378942
NH(3)-dependent NAD(+) synthetase	0.0836004	0.100114
Ni-sirohydrochlorin a,c-diamide reductive cyclase complex, component CfbC	-0.0846837	0.0957759
Nickel-responsive regulator	0.0192908	0.704841
Nicotinamide-nucleotide adenylyltransferase	-0.0338575	0.50608
Nicotinate phosphoribosyltransferase	-0.0901505	0.0761223
nicotinate-nucleotide adenylyltransferase	-0.0792858	0.118957
Nicotinate-nucleotide--dimethylbenzimidazole phosphoribosyltransferase	-0.135581	0.00748671
Nitric oxide reductase FlRd-NAD(+) reductase	0.0769649	0.130181
Nitrilase	-0.0793097	0.118845
Nitrogen fixation nifHD region glnB-like protein 1	-0.174691	0.000547205
Nitrogen fixation nifHD region glnB-like protein 2	-0.173118	0.000614983
Nitrogenase iron protein	-0.0784955	0.122691
Non-homologous end joining protein Ku	0.117368	0.020754
Non-specific ribonucleoside hydrolase RihC	0.0947925	0.0621291
Nucleoid occlusion factor SlmA	-0.00173417	0.972838
Nucleoid occlusion protein	-0.0756486	0.136902
Nucleoid-associated protein YbaB	-0.112814	0.0262756
Nucleoid-associated protein YejK	-0.0355349	0.485228
Nucleoside diphosphate kinase	0.0301231	0.554134
Nucleoside kinase	0.00186138	0.970847
Nucleoside permease NupG	0.100323	0.0482976
Nucleoside triphosphatase NudI	-0.0816572	0.108284
O-acetyl-ADP-ribose deacetylase	-0.0649041	0.202067
O-acetyltransferase WecH	0.0883532	0.0821858
o-succinylbenzoate synthase	0.114386	0.0242413
O-succinylhomoserine sulfhydrylase	-0.141391	0.0052689
Obg-like ATPase 1	-0.0561643	0.269762
Octanoyltransferase	0.0535094	0.293091
Oligoribonuclease	-0.123323	0.0150729
Ornithine carbamoyltransferase, anabolic	-0.108002	0.0334401
Ornithine carbamoyltransferase, catabolic	-0.00300613	0.952934
Orotate phosphoribosyltransferase	-0.0372502	0.464394
Orotidine 5'-phosphate decarboxylase	-0.0950314	0.0614704
Outer membrane protein A	0.0329933	0.517003
Outer membrane protein assembly factor BamA	0.0565813	0.266217
Outer membrane protein assembly factor BamB	0.073036	0.151025
Outer membrane protein assembly factor BamC	-0.040942	0.421282
Outer membrane protein assembly factor BamD	0.0370756	0.466492
Outer membrane protein assembly factor BamE	-0.0355736	0.484752
Outer-membrane lipoprotein carrier protein	0.0243264	0.632864
Outer-membrane lipoprotein LolB	-0.00365311	0.94282
oxaloacetate decarboxylase gamma chain	-0.047532	0.350418
Oxygen-dependent choline dehydrogenase	0.138239	0.00638538
Oxygen-dependent coproporphyrinogen-III oxidase	0.121648	0.0165136
p-hydroxybenzoic acid efflux pump subunit AaeA	0.0557079	0.27368
p-hydroxybenzoic acid efflux pump subunit AaeB	0.115467	0.022923
PanD regulatory factor	0.0345343	0.49761
Pantothenate kinase	0.0462011	0.364087
Pantothenate synthetase	-0.100582	0.047718
Penicillin-binding protein activator LpoA	-0.0318515	0.531619
Penicillin-binding protein activator LpoB	0.125929	0.0130499
Penicillin-insensitive murein endopeptidase	0.0335943	0.509393
Peptidase B	0.0445593	0.381401
Peptidase E	0.020474	0.687661
Peptidase T	-0.0503179	0.322871
Peptide chain release factor 1	-0.0894749	0.0783575
Peptide chain release factor 2	-0.0559299	0.271769
Peptide chain release factor 3	-0.15821	0.00177178
Peptide deformylase	-0.105057	0.038599
Peptide methionine sulfoxide reductase MsrA	0.0130767	0.797363
Peptide methionine sulfoxide reductase MsrB	0.178379	0.000414506
Peptidoglycan D,D-transpeptidase FtsI	-0.135624	0.00746768
Peptidoglycan D,D-transpeptidase MrdA	-0.102079	0.0444864
peptidoglycan glycosyltransferase FtsW	-0.106677	0.0356839
Peptidoglycan glycosyltransferase MrdB	-0.106331	0.0362908
Peptidoglycan-associated lipoprotein	0.0495052	0.330758
Peptidyl-tRNA hydrolase	-0.0920099	0.0702369
Periplasmic nitrate reductase	-0.0728435	0.152108
Periplasmic trehalase	0.0851671	0.0938891
Peroxiredoxin	0.0609853	0.230718
Peroxyureidoacrylate/ureidoacrylate amidohydrolase RutB	0.0738574	0.146471
Phenolic acid decarboxylase	-0.00360724	0.943537
Phenylalanine--tRNA ligase alpha subunit	0.00803624	0.874624
phosphatase YcdX	-0.103811	0.0409761
Phosphate acetyltransferase	-0.0622859	0.220907
Phosphate acyltransferase	-0.0664933	0.191217
Phosphatidylglycerol--prolipoprotein diacylglyceryl transferase	-0.0787517	0.121471
Phosphatidylserine decarboxylase proenzyme	-0.0106191	0.834837
Phosphatidylserine decarboxylase proenzyme 2	-0.127462	0.0119757
Phospho-N-acetylmuramoyl-pentapeptide-transferase	-0.0956987	0.0596612
Phosphoadenosine phosphosulfate reductase	-0.0211961	0.677254
Phosphocarrier protein HPr	-0.139231	0.00601296
Phosphodiesterase	-0.103603	0.0413845
Phosphoenolpyruvate carboxykinase (ATP)	-0.0591979	0.244699
Phosphoenolpyruvate carboxykinase [GTP]	0.0368511	0.469197
Phosphoenolpyruvate carboxylase	-0.0241473	0.63537
Phosphoenolpyruvate synthase	-0.0424091	0.404821
Phosphoenolpyruvate synthase regulatory protein	0.0283768	0.577346
Phosphoenolpyruvate transferase	0.0464067	0.361954
Phosphoenolpyruvate-protein phosphotransferase	-0.155693	0.00210024
Phosphoglucomutase/phosphomannomutase	-0.0957373	0.0595581
Phosphogluconate dehydratase	0.109424	0.0311679
Phosphoglucosamine mutase	-0.0525266	0.302058
Phosphoglucosamine/phosphogalactosamine mutase	-0.0123482	0.808427
Phosphoglycerate kinase	-0.0799532	0.115874
phosphoglycerate mutase GpmB	-0.0864842	0.0888993
Phosphoglycerol transferase I	0.0129725	0.798943
Phosphoglycolate phosphatase	-0.122371	0.0158777
Phosphoheptose isomerase	0.021581	0.67173
phosphoketolase	-0.174152	0.000569585
Phosphomannomutase	0.0124159	0.807397
Phosphomethylpyrimidine synthase	-0.130717	0.00994919
Phosphonoacetaldehyde hydrolase	0.0285265	0.575338
Phosphopantetheine adenylyltransferase	-0.0524271	0.302976
Phosphopentomutase	-0.107916	0.0335819
Phosphoribosyl-AMP cyclohydrolase	-0.135819	0.00738186
Phosphoribosyl-ATP pyrophosphatase	-0.00173785	0.97278
Phosphoribosyl-dephospho-CoA transferase	0.140798	0.0054645
Phosphoribosylamine--glycine ligase	-0.11609	0.0221919
Phosphoribosylaminoimidazole-succinocarboxamide synthase	-0.0496362	0.329478
Phosphoribosylformylglycinamidine cyclo-ligase	-0.089988	0.0766553
Phosphoribosylformylglycinamidine synthase	-0.133449	0.00848962
Phosphoribosylformylglycinamidine synthase subunit PurL	-0.0535052	0.293129
Phosphoribosylformylglycinamidine synthase subunit PurQ	-0.0307067	0.54648
Phosphoribosylglycinamide formyltransferase	-0.0746218	0.142327
Phosphoserine aminotransferase	-0.0766042	0.131997
Phosphoserine phosphatase	-0.146612	0.00380053
Phosphotransferase RcsD	-0.0101548	0.841961
Photosystem I assembly protein Ycf3	0.0475237	0.350502
Photosystem I iron-sulfur center	-0.0932487	0.0665265
Photosystem II 12 kDa extrinsic protein	-0.111767	0.0277117
PKHD-type hydroxylase YbiX	0.103245	0.0420963
Poly(A) polymerase I	-0.0860329	0.0905845
Polyamine aminopropyltransferase	-0.170273	0.000757703
Polyferredoxin protein MvhB	0.101673	0.0453431
Polyisoprenyl-teichoic acid--peptidoglycan teichoic acid transferase TagU	-0.111908	0.0275133
Polyphosphate kinase	-0.157059	0.00191567
Polyribonucleotide nucleotidyltransferase	-0.0960007	0.0588571
Porphobilinogen deaminase	-0.0962626	0.0581671
Potassium-transporting ATPase ATP-binding subunit	-0.059621	0.241337
Potassium-transporting ATPase KdpC subunit	0.100798	0.0472402
Potassium-transporting ATPase potassium-binding subunit	0.131237	0.00965542
PqqA binding protein	-0.0521122	0.305894
PqqA peptide cyclase	-0.0952426	0.0608931
Precorrin-2 dehydrogenase	-0.0906165	0.074611
Prephenate dehydratase	-0.0571119	0.261752
Primosomal protein 1	0.131277	0.00963318
primosomal protein N'	-0.107469	0.0343287
Primosomal replication protein N	-0.0222388	0.662333
Processive diacylglycerol beta-glucosyltransferase	-0.0591904	0.244759
Prokaryotic ubiquitin-like protein Pup	-0.1018	0.0450744
Proline iminopeptidase	0.0774549	0.127746
Proline--tRNA ligase	-0.0586363	0.249212
Proofreading thioesterase EntH	0.0360638	0.478751
Propionyl-CoA carboxylase, biotin carboxylase and biotin-carboxyl carrier subunit	-0.120505	0.0175648
Propionyl-CoA carboxylase, carboxyltransferase subunit	-0.0745329	0.142804
Protease HtpX	-0.0142704	0.779323
Proteasome-associated ATPase	-0.122085	0.0161266
Protein	0.0650563	0.20101
Protein adenylyltransferase SelO	0.0164337	0.746935
Protein ApaG	0.121177	0.0169396
Protein CysO	-0.113567	0.0252845
Protein DsrB	0.108296	0.0329588
Protein FdhE	-0.0480918	0.344767
Protein FixA	0.00955263	0.85122
Protein FixB	0.011755	0.817465
Protein GrpE	-0.0627959	0.217142
protein kinase UbiB	-0.0452682	0.373864
Protein MtfA	0.113969	0.0247675
Protein MTH_152	-0.083472	0.100638
Protein NrdI	-0.012127	0.811794
Protein PsiE	-0.00300667	0.952925
Protein RecA	-0.087895	0.0837927
Protein RnfH	-0.0420357	0.408974
Protein SlyX	0.0178579	0.725849
Protein Smg	0.0974432	0.0551388
Protein SprT	0.0590824	0.245622
Protein Syd	0.0799242	0.116006
Protein translation factor SUI1	0.0812993	0.109845
Protein translocase subunit SecA	-0.0876022	0.0848325
Protein translocase subunit SecD	-0.0539565	0.28907
Protein translocase subunit SecE	-0.045612	0.370242
Protein translocase subunit SecY	-0.0352732	0.48845
Protein TsgA	-0.0423918	0.405013
Protein TusB	0.0549439	0.280323
Protein TusC	0.0701221	0.168053
Protein ViaA	-0.0402089	0.429652
Protein YceI	0.101642	0.0454102
Protein YcgL	0.0328719	0.518547
Protein YebF	0.0986675	0.0521377
Protein-arginine kinase	-0.1308	0.00990208
Protein-disulfide oxidoreductase DsbI	-0.0515378	0.311264
Protein-export membrane protein SecD	-0.099475	0.050234
Protein-export membrane protein SecF	-0.0562909	0.268683
Protein-export protein SecB	-0.113586	0.0252601
Protein-glutamate methylesterase/protein-glutamine glutaminase	-0.12767	0.0118359
Protein-L-isoaspartate O-methyltransferase	0.0129845	0.798761
Protein-lysine N-methyltransferase	-0.0726342	0.153292
Protein-methionine-sulfoxide reductase catalytic subunit MsrP	0.103789	0.0410201
Protein-methionine-sulfoxide reductase heme-binding subunit MsrQ	-0.0129929	0.798634
Protoheme IX farnesyltransferase	0.0977335	0.0544145
Proton/glutamate-aspartate symporter	-0.019161	0.706735
Pseudouridine-5'-phosphate glycosidase	0.161638	0.00139995
PTS system fructose-specific EIIA component	-0.0015977	0.974975
PTS system fructose-specific EIIB component	0.00251139	0.960673
PTS system fructose-specific EIIC component	-0.0821817	0.106029
Purine nucleoside phosphorylase	-0.0281557	0.580316
Purine nucleoside phosphorylase DeoD-type	-0.0727833	0.152448
Purine ribonucleoside efflux pump NepI	0.0878254	0.0840389
Putative 1-aminocyclopropane-1-carboxylate deaminase	0.0588489	0.247497
putative 2-keto-3-deoxyxylonate dehydratase	-0.0631323	0.214684
Putative 3-methyladenine DNA glycosylase	0.0458964	0.367263
putative 6-oxopurine nucleoside phosphorylase	-0.104521	0.0396071
putative ABC transporter ATP-binding protein	-0.0956393	0.0598205
putative adenylyl-sulfate kinase	0.00079559	0.987537
Putative aminoacrylate hydrolase RutD	0.0168133	0.741296
Putative aminoacrylate peracid reductase RutC	0.0524158	0.303081
putative aminomethyltransferase	0.141018	0.00539121
Putative ammonium transporter	-0.225998	6.93815e-06
Putative ankyrin repeat protein	0.0655103	0.197877
putative aquaporin AqpM	-0.0214506	0.6736
Putative archaetidylserine decarboxylase proenzyme	0.0607861	0.232248
Putative arsenate reductase	0.0982039	0.0532578
Putative arsenical pump-driving ATPase	0.00565446	0.911599
Putative arsenical resistance operon repressor ArsD	0.0919607	0.0703878
Putative arsenical resistance operon repressor ArsR	-0.0472253	0.353539
Putative arsenical resistance operon repressor ArsR2	-0.0340476	0.503693
putative aspartokinase	-0.0648607	0.20237
putative ATP-dependent RNA helicase	-0.0419329	0.410122
putative bifunctional tRNA threonylcarbamoyladenosine biosynthesis protein	-0.0370806	0.466432
Putative biotin ligase	-0.108329	0.032905
putative branched-chain amino acid transport ATP-binding protein LivG	-0.0244519	0.63111
Putative branched-chain-amino-acid aminotransferase	-0.100288	0.0483759
putative cobalt-precorrin-6B C(15)-methyltransferase (decarboxylating)	-0.100988	0.0468232
Putative competence-damage inducible protein	-0.140003	0.0057367
putative copper-exporting P-type ATPase	-0.097639	0.0546492
Putative CRISPR-associated endoribonuclease-like protein Cas6	-0.00413279	0.935327
putative cyclic pyranopterin monophosphate synthase	-0.16922	0.000817945
Putative D-alanyl-D-alanine carboxypeptidase	-0.0405014	0.426301
Putative dimethyl sulfoxide reductase catalytic subunit A	-0.089195	0.079299
Putative dimethyl sulfoxide reductase iron-sulfur subunit B	-0.0759752	0.13521
Putative dimethyl sulfoxide reductase membrane subunit C	-0.130562	0.0100384
Putative fluoride ion transporter CrcB	-0.0140467	0.782694
Putative gamma-glutamylcyclotransferase	0.101016	0.0467619
putative GTP-binding protein EngB	-0.0618945	0.223827
putative HTH-type transcriptional regulator	-0.0656793	0.19672
putative HTH-type transcriptional regulator ArcR	0.0382307	0.452712
putative hydrogenase maturation factor HypB	-0.0702733	0.167136
Putative ion-transport protein YfeO	0.0347884	0.49445
putative isochorismatase family protein	0.133429	0.00849993
Putative L(+)-tartrate dehydratase subunit beta	-0.161933	0.00137156
putative membrane protein	-0.158009	0.00179624
Putative membrane protein insertion efficiency factor	-0.0609087	0.231305
putative membrane-bound hydrogenase subunit mbhJ	-0.00473341	0.925954
putative metallohydrolase	0.052073	0.306259
putative methanogenesis regulatory protein FilR2	-0.047293	0.352848
Putative methylthioribose-1-phosphate isomerase	0.0215083	0.672772
putative MFS-type transporter YcaD	0.169518	0.000800433
putative MFS-type transporter YfcJ	0.0163527	0.74814
putative MFS-type transporter YhhS	0.00937405	0.85397
Putative multidrug resistance protein MdtD	0.0347797	0.494559
Putative N-acetylmannosamine-6-phosphate 2-epimerase	-0.0573053	0.260137
Putative nickel-responsive regulator	0.0692852	0.1732
Putative nicotinate phosphoribosyltransferase	0.00276677	0.956678
putative nitrate transporter	0.0216705	0.670449
putative nitrogen regulatory PII-like protein	-0.22681	6.4172e-06
putative Nudix hydrolase NudL	0.106534	0.0359334
Putative phenylalanine aminotransferase	-0.0768125	0.130946
putative phosphoenolpyruvate synthase	-0.0804187	0.11376
Putative pre-16S rRNA nuclease	-0.0804237	0.113737
putative protein	-0.028306	0.578295
Putative pyruvate, phosphate dikinase regulatory protein	0.0190266	0.708699
Putative ribose-phosphate pyrophosphokinase	-0.0869	0.0873688
putative ribosomal RNA small subunit methyltransferase A	-0.0973478	0.0553785
putative RNA 2'-phosphotransferase	-0.0612625	0.228601
putative S-adenosylmethionine-dependent methyltransferase	-0.0538472	0.290049
Putative septation protein SpoVG	-0.123044	0.015305
Putative sugar kinase	-0.0880022	0.0834142
putative Thioredoxin	0.143494	0.00462504
Putative thiosulfate sulfurtransferase	0.0455269	0.371136
putative thymidylate kinase	-0.0325125	0.523132
Putative thymidylate synthase	0.0831279	0.102054
putative transaldolase	-0.0560155	0.271035
putative translation initiation factor IF-2	-0.0108151	0.831832
Putative transport protein YbjL	0.0242289	0.634228
Putative transport protein YidE	0.0374976	0.46143
putative transporter in sor 3'region	-0.10841	0.032775
putative tRNA pseudouridine synthase B	-0.0228975	0.652976
Putrescine aminotransferase	0.180114	0.000363046
Putrescine carbamoyltransferase	-0.0235092	0.644334
Putrescine transporter PotE	0.0447161	0.379726
Pyridinium-3,5-bisthiocarboxylic acid mononucleotide nickel insertion protein	-0.108117	0.0332513
Pyridoxal 5'-phosphate synthase subunit PdxS	-0.229995	4.71094e-06
Pyridoxal 5'-phosphate synthase subunit PdxT	-0.209075	3.31066e-05
Pyridoxal phosphate homeostasis protein	-0.0629591	0.215947
Pyridoxine 5'-phosphate synthase	0.0658057	0.195858
Pyridoxine/pyridoxal/pyridoxamine kinase	-0.0961	0.0585948
Pyridoxine/pyridoxamine 5'-phosphate oxidase	0.162434	0.00132459
Pyrimidine monooxygenase RutA	0.100413	0.0480963
Pyrimidine-specific ribonucleoside hydrolase RihA	-0.0107726	0.832484
Pyrimidine-specific ribonucleoside hydrolase RihB	-0.0123597	0.808252
Pyrimidine/purine nucleoside phosphorylase	0.128554	0.0112583
Pyrophosphatase PpaX	-0.083072	0.102285
Pyrophosphate--fructose 6-phosphate 1-phosphotransferase	-0.122324	0.015918
Pyrophosphate--fructose 6-phosphate 1-phosphotransferase subunit alpha	0.040962	0.421055
Pyrrolidone-carboxylate peptidase	-0.0981942	0.0532813
Pyrroline-5-carboxylate reductase	-0.127117	0.0122105
Pyrrolysine--tRNA ligase	0.0500492	0.325465
Pyruvate carboxylase subunit A	-0.0794407	0.118236
Pyruvate carboxylase subunit B	-0.043647	0.391235
Pyruvate kinase	-0.113673	0.0251468
Pyruvate synthase subunit PorA	-0.170032	0.000771116
Pyruvate synthase subunit PorB	-0.0813085	0.109805
Pyruvate synthase subunit PorD	-0.144576	0.00432234
Pyruvate/ketoisovalerate oxidoreductases common subunit gamma	-0.11557	0.0228014
Pyruvoyl-dependent arginine decarboxylase	0.126927	0.0123414
Queuine tRNA-ribosyltransferase catalytic subunit 1	0.00321713	0.949635
queuosine precursor transporter	0.0144804	0.776161
Quinate/shikimate dehydrogenase	-0.158177	0.00177587
Quinolinate synthase A	-0.102936	0.0427184
Quinone-dependent D-lactate dehydrogenase	0.0429118	0.39927
RecBCD enzyme subunit RecB	-0.00972631	0.848547
RecBCD enzyme subunit RecC	-0.0125509	0.805344
RecBCD enzyme subunit RecD	-0.0577365	0.256562
Recombination protein RecR	-0.0809053	0.111583
Recombination-associated protein RdgC	0.0841683	0.0978205
Redox-sensing transcriptional repressor Rex	-0.0648523	0.202429
Regulator of nucleoside diphosphate kinase	0.103548	0.0414932
Regulator of ribonuclease activity A	0.109354	0.0312763
Regulator of ribonuclease activity B	0.0410289	0.420296
Regulator of RpoS	-0.0859382	0.0909411
Regulator of sigma D	0.0993826	0.0504487
Regulatory protein RecX	-0.105921	0.0370207
Regulatory protein Spx	-0.0452277	0.374292
Release factor glutamine methyltransferase	-0.120256	0.0178013
Replication factor C large subunit	0.0345482	0.497437
Replication factor C small subunit	-0.148899	0.00328303
Respiratory nitrate reductase subunit alpha	0.00277141	0.956605
Respiratory nitrate reductase subunit beta	-0.0478888	0.346809
Reverse gyrase	-0.0818616	0.107401
Rhamnulokinase	-0.0966062	0.0572718
Rhamnulose-1-phosphate aldolase	-0.0916886	0.0712266
Rhomboid protease GlpG	-0.123417	0.0149952
Ribitol-5-phosphate cytidylyltransferase	-0.114187	0.0244914
Riboflavin biosynthesis protein RibBA	-0.0671146	0.187093
Ribokinase	-0.0318861	0.531174
Ribonuclease 3	-0.0831254	0.102064
Ribonuclease BN	-0.0572207	0.260842
Ribonuclease D	-0.0156402	0.758767
Ribonuclease E	-0.11909	0.0189461
Ribonuclease H	-0.103521	0.0415469
Ribonuclease HII	-0.0770335	0.129838
Ribonuclease HIII	-0.0204463	0.68806
Ribonuclease J	-0.120048	0.0180007
Ribonuclease M5	-0.0710118	0.162709
Ribonuclease P protein component	-0.101216	0.0463254
Ribonuclease PH	0.0385395	0.449067
Ribonuclease R	-0.137767	0.00656939
Ribonuclease T	0.0107691	0.832538
Ribonuclease VapC3	0.0445555	0.381441
Ribonuclease Y	-0.126002	0.0129972
Ribonuclease Z	-0.153385	0.00244927
Ribose 1,5-bisphosphate isomerase	0.0543248	0.285786
Ribose 1,5-bisphosphate phosphokinase PhnN	0.0696338	0.171042
Ribose-5-phosphate isomerase A	0.00582362	0.908966
Ribose-phosphate pyrophosphokinase	0.0595963	0.241533
Ribosomal RNA large subunit methyltransferase E	-0.0472249	0.353543
Ribosomal RNA large subunit methyltransferase F	0.112297	0.0269767
Ribosomal RNA large subunit methyltransferase G	-0.0299759	0.556074
Ribosomal RNA large subunit methyltransferase H	-0.0861042	0.0903163
Ribosomal RNA large subunit methyltransferase I	-0.100614	0.047648
Ribosomal RNA large subunit methyltransferase J	0.0477434	0.348277
Ribosomal RNA large subunit methyltransferase K/L	-0.0766809	0.131609
Ribosomal RNA large subunit methyltransferase M	0.00680078	0.893775
Ribosomal RNA small subunit methyltransferase A	-0.104005	0.0405981
Ribosomal RNA small subunit methyltransferase B	-0.129284	0.0108006
Ribosomal RNA small subunit methyltransferase C	0.00668255	0.895611
Ribosomal RNA small subunit methyltransferase F	-0.138456	0.00630219
Ribosomal RNA small subunit methyltransferase G	-0.103066	0.0424559
Ribosomal RNA small subunit methyltransferase H	-0.140913	0.005426
Ribosomal RNA small subunit methyltransferase I	-0.0717512	0.158364
Ribosomal RNA small subunit methyltransferase J	-0.0372564	0.46432
Ribosomal silencing factor RsfS	-0.046986	0.355986
Ribosome hibernation promoting factor	-0.037579	0.460458
Ribosome maturation factor RimM	-0.0835944	0.100138
Ribosome maturation factor RimP	-0.0629964	0.215674
Ribosome modulation factor	0.111703	0.0278009
Ribosome-binding factor A	-0.0724544	0.154315
Ribosome-recycling factor	-0.0725828	0.153584
Ribulokinase	0.0525661	0.301695
Ribulose-5-phosphate reductase	-0.00617795	0.903453
RNA 2',3'-cyclic phosphodiesterase	0.20881	3.38929e-05
RNA 3'-terminal phosphate cyclase	-0.00205457	0.967822
RNA chaperone ProQ	0.0544265	0.284884
RNA polymerase sigma factor FliA	-0.0151447	0.766184
RNA polymerase sigma factor RpoD	-0.119292	0.0187429
RNA polymerase sigma factor RpoH	-0.0803169	0.11422
RNA polymerase sigma factor RpoS	-0.124947	0.0137824
RNA polymerase sigma factor SigI	-0.0128036	0.801506
RNA polymerase-associated protein RapA	-0.0978092	0.0542268
RNA polymerase-binding protein RbpA	-0.0871108	0.0866012
RNA polymerase-binding transcription factor DksA	0.0637324	0.210349
RNA pyrophosphohydrolase	-0.134162	0.0081419
RNA-binding protein Hfq	-0.0192019	0.706138
RNase adapter protein RapZ	-0.109332	0.0313115
Rubredoxin	0.0543698	0.285387
RutC family protein	-0.0899898	0.0766491
S-adenosyl-L-methionine-dependent uroporphyrinogen III methyltransferase	-0.198858	8.01747e-05
S-adenosylmethionine decarboxylase proenzyme	-0.00664749	0.896156
S-adenosylmethionine synthase	-0.059097	0.245506
S-adenosylmethionine:tRNA ribosyltransferase-isomerase	-0.026054	0.608907
S-inosyl-L-homocysteine hydrolase	0.0590928	0.245539
S-methyl-5'-thioadenosine phosphorylase	0.069614	0.171164
S-ribosylhomocysteine lyase	-0.139277	0.00599611
SAMP-activating enzyme E1	-0.122705	0.0155912
Sec-independent protein translocase protein TatA	-0.0164814	0.746226
Sec-independent protein translocase protein TatB	-0.181496	0.00032638
Sec-independent protein translocase protein TatC	-0.0315769	0.535166
Sec-independent protein translocase protein TatE	0.100521	0.0478538
Secretion monitor	0.0794394	0.118242
Segregation and condensation protein A	-0.118728	0.0193148
Segregation and condensation protein B	-0.124965	0.0137682
Selenide, water dikinase	-0.127128	0.0122029
Sensor histidine kinase RcsC	-0.0629277	0.216176
Sensory rhodopsin II transducer	-0.138775	0.00618149
Septation ring formation regulator EzrA	-0.0285785	0.574642
septum site-determining protein MinC	-0.181086	0.00033687
Serine hydroxymethyltransferase	-0.0780417	0.124876
Serine--tRNA ligase	-0.0439117	0.388365
Serine-protein kinase RsbW	0.0922929	0.0693749
Serine/threonine transporter SstT	-0.101257	0.046238
Serine/threonine-protein kinase PknD	-0.154141	0.0023296
Shikimate dehydrogenase (NADP(+))	-0.0879333	0.0836574
Shikimate kinase	-0.131261	0.00964217
Shikimate kinase 2	0.0701445	0.167917
Short chain isoprenyl diphosphate synthase	0.0288614	0.570859
Sialic acid transporter NanT	0.047346	0.352308
Sigma factor-binding protein Crl	0.0769431	0.130291
Signal recognition particle 54 kDa protein	-0.0766996	0.131515
Signal recognition particle receptor FtsY	-0.113906	0.024848
Single-stranded DNA-binding protein	-0.0775445	0.127305
Siroheme synthase	-0.0684806	0.178258
Small heat shock protein HSP16.5	-0.0545762	0.28356
Small heat shock protein IbpA	0.0856406	0.0920702
Small heat shock protein IbpB	-0.0617642	0.224806
Small ribosomal subunit biogenesis GTPase RsgA	-0.0759969	0.135098
Small-conductance mechanosensitive channel MscMJ	-0.0450154	0.37654
Sodium/alanine symporter AgcS	-0.134466	0.00799743
Sodium/calcium exchanger MaX1	-0.174183	0.000568282
Sodium/glutamate symporter	-0.112813	0.0262769
Soluble pyridine nucleotide transhydrogenase	-0.0308679	0.544376
Spermidine export protein MdtI	0.0458204	0.368058
Spermidine export protein MdtJ	0.127838	0.0117238
SsrA-binding protein	-0.0741121	0.145079
Stomatin	-0.108743	0.0322398
Stress response kinase A	-0.133967	0.00823548
Subtilisin-like serine protease	-0.165329	0.00108074
Succinate--CoA ligase [ADP-forming] subunit alpha	0.0341331	0.502622
Succinate-semialdehyde dehydrogenase (acetylating)	0.0560705	0.270564
Succinyl-diaminopimelate desuccinylase	-0.0393576	0.439491
Succinylglutamate desuccinylase	0.0543388	0.285662
sugar efflux transporter	-0.0184451	0.717214
Sugar fermentation stimulation protein	-0.0980517	0.0536298
Sugar fermentation stimulation protein A	-0.0664048	0.19181
Sulfate adenylyltransferase subunit 1	-0.175202	0.000526715
Sulfate adenylyltransferase subunit 2	-0.126313	0.0127732
Sulfate transporter CysZ	0.099015	0.0513112
Sulfhydrogenase 1 subunit beta	-0.0380032	0.455408
Sulfhydrogenase 1 subunit gamma	-0.011384	0.823128
Sulfhydrogenase 2 subunit beta	-0.113087	0.025913
Sulfhydrogenase 2 subunit gamma	-0.0635725	0.211498
Sulfide dehydrogenase subunit alpha	-0.125575	0.0133099
Sulfide dehydrogenase subunit beta	-0.0959736	0.058929
Sulfofructosephosphate aldolase	0.141198	0.00533185
Sulfopyruvate decarboxylase	-0.00993801	0.845292
Sulfopyruvate decarboxylase subunit beta	-0.00524227	0.91802
Sulfoquinovose isomerase	-0.119175	0.0188602
Sulfur carrier protein FdhD	-0.152584	0.00258239
Sulfur carrier protein TusA	-0.0478809	0.346889
Sulfurtransferase TusD	0.0375227	0.461131
Superoxide dismutase [Fe]	0.0649093	0.202032
Superoxide dismutase [Mn/Fe]	0.0352918	0.488222
Surface composition regulator	0.0743084	0.144014
Tagatose 1,6-diphosphate aldolase	0.00116473	0.981755
Tat proofreading chaperone DmsD	-0.0223743	0.660403
Tautomerase PptA	0.134624	0.00792302
TDP-N-acetylfucosamine:lipid II N-acetylfucosaminyltransferase	0.0185666	0.715432
Tetraacyldisaccharide 4'-kinase	0.0245094	0.630307
Tetrahedral aminopeptidase	-0.0263743	0.604509
Tetrahydromethanopterin:alpha-L-glutamate ligase	0.0676144	0.183823
Tetrathionate hydrolase	0.0913447	0.0722981
Thermosome subunit	-0.0285814	0.574603
Thermosome subunit 1	0.0012595	0.980271
Thermosome subunit alpha	-0.0383398	0.451422
Thermosome subunit beta	-0.0204202	0.688439
Thermostable carboxypeptidase 1	-0.0582746	0.252148
Thiamine kinase	-0.0392065	0.441251
Thiamine thiazole synthase	-0.123332	0.0150651
Thiamine-monophosphate kinase	-0.0976339	0.0546621
Thiamine-phosphate synthase	-0.137945	0.00649967
Thiazole synthase	-0.177165	0.000454448
Thiol peroxidase	0.0410323	0.420258
Thiol-disulfide oxidoreductase ResA	0.0526838	0.300613
Thiol:disulfide interchange protein DsbD	0.0412259	0.418067
Thiol:disulfide interchange protein DsbL	0.0292591	0.565561
Thioredoxin	0.00205865	0.967758
Thioredoxin/glutathione peroxidase BtuE	0.00666405	0.895898
Thiosulfate sulfurtransferase GlpE	-0.0383801	0.450946
Threonine synthase	0.0717143	0.158579
Threonine--tRNA ligase catalytic subunit	-0.0842776	0.0973839
Threonylcarbamoyl-AMP synthase	-0.0782429	0.123903
Thymidine kinase	-0.00446815	0.930092
Thymidine phosphorylase	-0.0745621	0.142647
Thymidylate kinase	-0.0671808	0.186658
Thymidylate synthase	0.00797664	0.875547
Tol-Pal system protein TolB	0.0218843	0.667391
Tol-Pal system protein TolQ	0.101212	0.0463349
Tol-Pal system protein TolR	0.052305	0.304105
Trans-aconitate 2-methyltransferase	0.0832932	0.101372
Transaldolase	-0.0244554	0.631062
Transcription antitermination protein NusB	-0.0847415	0.0955487
Transcription antitermination protein RfaH	0.0743651	0.143708
Transcription attenuation protein MtrB	-0.00897986	0.860046
Transcription elongation factor GreA	-0.0857767	0.0915526
Transcription elongation factor GreB	-0.0185992	0.714954
Transcription factor FapR	-0.0791462	0.11961
Transcription termination factor Rho	-0.085448	0.0928066
Transcription termination/antitermination protein NusA	-0.0631251	0.214737
Transcription termination/antitermination protein NusG	-0.0518542	0.308298
Transcription-repair-coupling factor	-0.112883	0.0261834
Transcriptional regulator MraZ	-0.0788968	0.120784
Transcriptional regulator SlyA	-0.0863892	0.0892519
Transcriptional regulatory protein RcsA	0.0628976	0.216397
Transcriptional regulatory protein RcsB	-0.0111636	0.826499
transcriptional regulatory protein YebC	-0.044011	0.387292
transcriptional regulatory protein YeeN	0.0198742	0.696351
Transcriptional repressor NrdR	-0.0944901	0.062971
Transducer protein Htr18	-0.0796658	0.117194
Transducer protein Htr6	0.0380049	0.455387
transfer-messenger RNA, SsrA	-0.0344907	0.498154
Translation initiation factor 2 subunit alpha	-0.0954367	0.0603662
Translation initiation factor IF-1	-0.0152778	0.764189
Translation initiation factor IF-2	-0.0661452	0.193556
Translation initiation factor IF-3	-0.0493136	0.332635
Translational regulator CsrA	-0.255172	3.49338e-07
Trehalose synthase	-0.104637	0.0393871
Trehalose/maltose import ATP-binding protein MalK	-0.062336	0.220535
Trehalose/maltose transport system permease protein MalF	-0.0429643	0.398693
Trehalose/maltose transport system permease protein MalG	-0.055698	0.273765
Trehalose/maltose-binding protein MalE	-0.0285109	0.575547
Tricorn protease	0.0377627	0.458267
Trigger factor	-0.145551	0.00406478
Trimethylamine corrinoid protein	0.00659441	0.89698
Trimethylamine methyltransferase MttB	0.0790195	0.120205
Triosephosphate isomerase	-0.0767622	0.131199
Tritrans,polycis-undecaprenyl-diphosphate synthase (GGDP specific)	-0.0886263	0.0812401
Trk system potassium uptake protein TrkA	-0.131402	0.00956373
tRNA (cytidine-2'-O-)-methyltransferase TrmJ	-0.075981	0.13518
tRNA (cytidine(34)-2'-O)-methyltransferase	-0.0917272	0.071107
tRNA (cytosine(49)-C(5))-methyltransferase	-0.0162216	0.750091
tRNA (guanine-N(1)-)-methyltransferase	-0.0908763	0.0737791
tRNA (guanine-N(7)-)-methyltransferase	-0.104897	0.0388975
tRNA (guanine(10)-N2)-dimethyltransferase	0.0625757	0.218762
tRNA (guanine(6)-N2)-methyltransferase	-0.114432	0.0241849
tRNA (guanosine(18)-2'-O)-methyltransferase	0.0429525	0.398823
tRNA (uracil(54)-C(5))-methyltransferase	-0.115027	0.0234519
tRNA 2-selenouridine synthase	0.088044	0.0832674
tRNA 5-carboxymethoxyuridine methyltransferase	-0.0132639	0.794526
tRNA 5-methylaminomethyl-2-thiouridine biosynthesis bifunctional protein MnmC	-0.00143995	0.977445
tRNA dimethylallyltransferase	-0.0664562	0.191466
tRNA modification GTPase MnmE	-0.0893037	0.0789323
tRNA N6-adenosine threonylcarbamoyltransferase	-0.155604	0.00211278
tRNA N6-adenosine threonylcarbamoyltransferase, mitochondrial	-0.0659691	0.194748
tRNA pseudouridine synthase A	-0.121043	0.0170625
tRNA pseudouridine synthase B	-0.151477	0.00277697
tRNA pseudouridine synthase D	0.0713171	0.160904
tRNA sulfurtransferase	-0.088116	0.0830146
tRNA U34 carboxymethyltransferase	0.0884124	0.0819803
tRNA uridine 5-carboxymethylaminomethyl modification enzyme MnmG	-0.107713	0.033919
tRNA uridine(34) acetyltransferase	-0.00742503	0.88409
tRNA-2-methylthio-N(6)-dimethylallyladenosine synthase	-0.0912243	0.0726766
tRNA-5-methyluridine(54) 2-sulfurtransferase	-0.048513	0.340553
tRNA-Ala(cgc)	0.0578604	0.255541
tRNA-Ala(ggc)	0.0249901	0.623613
tRNA-Ala(tgc)	-0.0357162	0.483002
tRNA-Arg(acg)	-0.0558392	0.272549
tRNA-Arg(ccg)	-0.0690899	0.174417
tRNA-Arg(cct)	-0.0110051	0.828923
tRNA-Arg(gcg)	0.0283686	0.577455
tRNA-Arg(tcg)	0.131197	0.00967759
tRNA-Arg(tct)	-0.0647415	0.203203
tRNA-Asn(gtt)	-0.0960447	0.0587407
tRNA-Asp(gtc)	-0.0727237	0.152785
tRNA-Cys(gca)	-0.0682389	0.179798
tRNA-cytidine(32) 2-sulfurtransferase	-0.179173	0.000390161
tRNA-dihydrouridine synthase B	-0.0995925	0.0499617
tRNA-dihydrouridine(16) synthase	-0.148527	0.00336255
tRNA-dihydrouridine(20/20a) synthase	-0.0873152	0.0858619
tRNA-Gln(ctg)	-0.0876277	0.0847416
tRNA-Gln(ttg)	-0.0470856	0.354967
tRNA-Glu(ctc)	-0.0809759	0.11127
tRNA-Glu(ttc)	-0.0758257	0.135982
tRNA-Gly(ccc)	-0.0155315	0.760392
tRNA-Gly(gcc)	-0.0779626	0.12526
tRNA-guanine(15) transglycosylase	-0.0755761	0.137279
tRNA-His(gtg)	-0.0763412	0.133333
tRNA-Ile(gat)	-0.00584064	0.908701
tRNA-Ile(tat)	-0.030386	0.55068
tRNA-Leu(caa)	-0.0405821	0.425379
tRNA-Leu(cag)	-0.0659428	0.194926
tRNA-Leu(gag)	-0.000221644	0.996528
tRNA-Leu(taa)	-0.0954153	0.0604243
tRNA-Leu(tag)	-0.0854442	0.0928212
tRNA-Lys(ctt)	-0.0762776	0.133658
tRNA-Lys(ttt)	-0.0869251	0.0872771
tRNA-Met(cat)	-0.0738849	0.14632
tRNA-modifying protein YgfZ	-0.043473	0.393127
tRNA-Phe(gaa)	-0.0675902	0.183981
tRNA-Pro(agg)	-0.00876375	0.863381
tRNA-Pro(cgg)	-0.0685533	0.177796
tRNA-Pro(ggg)	-0.00296368	0.953598
tRNA-Pro(tgg)	-0.0795454	0.11775
tRNA-SeC(tca)	0.103716	0.0411619
tRNA-Ser(act)	0.113617	0.0252192
tRNA-Ser(cga)	-0.0402819	0.428814
tRNA-Ser(gct)	-0.0546461	0.282943
tRNA-Ser(gga)	-0.00633419	0.901024
tRNA-Ser(tga)	-0.0605466	0.234096
tRNA-specific 2-thiouridylase MnmA	-0.101635	0.0454244
tRNA-specific adenosine deaminase	-0.102564	0.0434774
tRNA-splicing ligase RtcB	0.00565273	0.911626
tRNA-Stop(tta)	0.014281	0.779163
tRNA-Thr(cgt)	-0.0578718	0.255447
tRNA-Thr(ggt)	-0.0781316	0.124441
tRNA-Thr(tgt)	-0.0716023	0.159232
tRNA-Trp(cca)	-0.0845677	0.0962329
tRNA-Tyr(ata)	-0.0171974	0.735603
tRNA-Tyr(gta)	-0.0993185	0.0505983
tRNA-Val(cac)	-0.0187096	0.713335
tRNA-Val(gac)	-0.0117042	0.81824
tRNA(fMet)-specific endonuclease VapC	-0.0358593	0.48125
tRNA(Ile)-lysidine synthase	-0.100585	0.0477117
tRNA(Met) cytidine acetate ligase	-0.12703	0.0122699
tRNA(Met) cytidine acetyltransferase TmcA	0.018147	0.721593
tRNA/tmRNA (uracil-C(5))-methyltransferase	0.0559296	0.271772
tRNA1(Val) (adenine(37)-N6)-methyltransferase	-0.0929452	0.0674203
Trp operon repressor	0.104776	0.0391254
Tryptophan synthase alpha chain	-0.184451	0.000259266
Tryptophan synthase beta chain	-0.057791	0.256112
Tryptophan synthase beta chain 1	-0.105873	0.0371069
Tryptophan--tRNA ligase	-0.080556	0.113143
Tryptophanase	0.0842844	0.0973567
Tubulin-like protein CetZ	-0.109081	0.0317038
Tungsten-containing aldehyde ferredoxin oxidoreductase	0.111286	0.0283928
Type 3 secretion system secretin	0.0358767	0.481037
Type A flavoprotein FprA	-0.0571979	0.261033
Type II pantothenate kinase	0.00836752	0.869501
Type III pantothenate kinase	-0.0972687	0.0555778
Type-1 restriction enzyme MjaXIP specificity protein	-0.0209836	0.68031
Type-2 restriction enzyme MjaIII	-0.0516181	0.310509
Type-4 uracil-DNA glycosylase	-0.01414	0.781287
Type-5 uracil-DNA glycosylase	-0.0715749	0.159392
Tyrosine phenol-lyase	0.101603	0.0454924
Tyrosine recombinase XerA	-0.0327417	0.520206
Tyrosine recombinase XerC	0.000888873	0.986076
Tyrosine recombinase XerD	0.0025587	0.959933
Tyrosine recombinase XerD-like protein	-0.0737595	0.147008
Tyrosine recombinase XerH	0.0745814	0.142543
Tyrosine--tRNA ligase	-0.0800814	0.115288
Ubiquinone biosynthesis accessory factor UbiJ	0.115681	0.0226701
Ubiquinone biosynthesis accessory factor UbiK	0.141909	0.00510311
Ubiquinone biosynthesis O-methyltransferase, mitochondrial	-0.0400913	0.431003
UbiX-like flavin prenyltransferase	-0.0520358	0.306605
UDP-2,3-diacylglucosamine hydrolase	0.040047	0.431513
UDP-3-O-(3-hydroxymyristoyl)glucosamine N-acyltransferase	0.0133505	0.793216
UDP-3-O-acyl-N-acetylglucosamine deacetylase	0.0239822	0.637685
UDP-4-amino-4-deoxy-L-arabinose--oxoglutarate aminotransferase	-0.0194251	0.702883
UDP-glucose 6-dehydrogenase AglM	-0.0535743	0.292505
UDP-N-acetyl-alpha-D-muramoyl-L-alanyl-L-glutamate epimerase	-0.0741487	0.14488
UDP-N-acetyl-D-mannosamine dehydrogenase	0.10084	0.0471477
UDP-N-acetyl-D-mannosaminuronic acid transferase	0.156121	0.00204072
UDP-N-acetylenolpyruvoylglucosamine reductase	-0.112537	0.0266497
UDP-N-acetylglucosamine 1-carboxyvinyltransferase	-0.0937726	0.0650063
UDP-N-acetylglucosamine 2-epimerase	0.0470883	0.354938
UDP-N-acetylglucosamine 3-dehydrogenase	0.0118153	0.816544
UDP-N-acetylglucosamine--dolichyl-phosphate N-acetylglucosaminyltransferase	-0.0447905	0.378932
UDP-N-acetylglucosamine--N-acetylmuramyl-(pentapeptide) pyrophosphoryl-undecaprenol N-acetylglucosamine transferase	-0.117476	0.0206373
UDP-N-acetylglucosamine--peptide N-acetylglucosaminyltransferase GtfA subunit	-0.0531079	0.296732
UDP-N-acetylglucosamine--peptide N-acetylglucosaminyltransferase stabilizing protein GtfB	-0.0340827	0.503253
UDP-N-acetylmuramate--L-alanine ligase	-0.0884098	0.0819891
UDP-N-acetylmuramate--L-alanyl-gamma-D-glutamyl-meso-2,6-diaminoheptandioate ligase	0.0395973	0.436708
UDP-N-acetylmuramoyl-L-alanine--L-glutamate ligase	0.00320657	0.9498
UDP-N-acetylmuramoyl-L-alanyl-D-glutamate--2,6-diaminopimelate ligase	-0.109938	0.0303794
UDP-N-acetylmuramoyl-tripeptide--D-alanyl-D-alanine ligase	-0.113734	0.0250685
UDP-N-acetylmuramoylalanine--D-glutamate ligase	-0.0878753	0.0838622
UDP-sulfoquinovose synthase	0.019029	0.708662
Ulilysin	-0.0102162	0.841018
Undecaprenyl phosphate-alpha-4-amino-4-deoxy-L-arabinose arabinosyl transferase	0.00163894	0.974329
Undecaprenyl-diphosphatase	-0.0880089	0.083391
Undecaprenyl-phosphate 4-deoxy-4-formamido-L-arabinose transferase	-0.12398	0.0145382
Undecaprenyl-phosphate alpha-N-acetylglucosaminyl 1-phosphate transferase	0.0455333	0.37107
Universal stress protein	-0.0154639	0.761404
Universal stress protein B	0.0999345	0.0491766
Uracil phosphoribosyltransferase	-0.0540129	0.288566
Uracil-DNA glycosylase	-0.0995166	0.0501374
Urease accessory protein UreD	-0.123299	0.0150927
Urease accessory protein UreE	-0.0818767	0.107336
Urease accessory protein UreF	-0.140335	0.00562158
Urease accessory protein UreG	0.0149187	0.769573
Urease subunit alpha	-0.129746	0.0105194
Urease subunit gamma	-0.0802486	0.114529
Ureidoglycolate lyase	0.0513981	0.312579
Uridine kinase	-0.0511387	0.315031
Uridylate kinase	-0.0607802	0.232293
Urocanate hydratase	0.179933	0.000368116
Uronate isomerase	-0.0978396	0.0541518
Uroporphyrinogen decarboxylase	0.138861	0.00614948
Uroporphyrinogen-III C-methyltransferase	-0.123352	0.0150484
UTP--glucose-1-phosphate uridylyltransferase	-0.0670997	0.187192
UTP--glucose-1-phosphate uridylyltransferase AglF	-0.18603	0.000228928
UV DNA damage endonuclease	-0.138405	0.00632152
UvrABC system protein A	-0.0967157	0.0569888
UvrABC system protein B	-0.104747	0.0391786
UvrABC system protein C	-0.0994071	0.0503917
V-type ATP synthase alpha chain	0.0105967	0.83518
V-type ATP synthase beta chain	-0.0307236	0.54626
V-type ATP synthase subunit C	-0.0135439	0.790289
V-type ATP synthase subunit D	0.0349469	0.492484
V-type ATP synthase subunit E	0.018808	0.711896
V-type ATP synthase subunit F	-0.00578291	0.9096
V-type proton ATPase subunit E	-0.0473001	0.352776
Virginiamycin B lyase	0.04312	0.396985
Vitamin B12 import ATP-binding protein BtuD	-0.0581493	0.253172
Vitamin B12 import system permease protein BtuC	-0.0998264	0.0494238
Vitamin B12 transporter BtuB	0.0594704	0.24253
Vitamin B12-binding protein	-0.0236862	0.641843
Vitamin B12-dependent ribonucleoside-diphosphate reductase	-0.0480547	0.345139
Voltage-gated ClC-type chloride channel ClcB	-0.128016	0.0116065
Xaa-Pro dipeptidase	-0.0156503	0.758616
Xaa-Pro dipeptidyl-peptidase	-0.00337787	0.947122
Xanthine phosphoribosyltransferase	-0.0551949	0.278129
Xylose isomerase	0.0330539	0.516234
Xylulose kinase	-0.119793	0.0182484
Zinc metalloprotease	0.0280756	0.581394
Zinc metalloprotease TldD	0.125632	0.0132677
Zinc transport protein ZntB	0.0187561	0.712656
Zinc transporter ZitB	0.0291001	0.567677
Zinc transporter ZupT	-0.0806203	0.112854
1-aminocyclopropane-1-carboxylate deaminase	-0.00818215	0.872367
2-dehydro-3-deoxy-phosphogluconate/2-dehydro-3-deoxy-6-phosphogalactonate aldolase	0.133997	0.00822128
2-keto-4-pentenoate hydratase	0.0996903	0.0497362
2-oxoacid:ferredoxin oxidoreductase 1, subunit beta	-0.0278058	0.585032
2-oxoacid:ferredoxin oxidoreductase 2, subunit beta	-0.162372	0.00133035
2,3-dihydroxyphenylpropionate/2,3-dihydroxicinnamic acid 1,2-dioxygenase	0.0612448	0.228736
5-dehydro-4-deoxyglucarate dehydratase	0.139914	0.00576817
5-demethoxyubiquinone hydroxylase, mitochondrial	0.0597261	0.240507
5.8S ribosomal RNA (partial)	-0.0174443	0.731952
6-carboxyhexanoate--CoA ligase	-0.033248	0.513771
7,8-dihydro-6-hydroxymethylpterin dimethyltransferase	0.101417	0.0458919
Accessory Sec system protein translocase subunit SecY2	0.00373907	0.941477
Acetaldehyde dehydrogenase	0.0910946	0.073086
Acetate--CoA ligase [ADP-forming] I subunit beta	0.072138	0.156127
Acetyl-CoA decarbonylase/synthase complex subunit beta	-0.0484111	0.341569
Acetyl-CoA decarbonylase/synthase complex subunit delta 1	-0.127097	0.0122242
Alpha-galactosidase	-0.101756	0.0451678
Aminomethyltransferase	0.0467518	0.358391
ATP synthase subunit b'	-0.0367017	0.471001
Beta-galactosidase Bga	-0.0949516	0.0616898
Beta-lysine N6-acetyltransferase	-0.0398423	0.433873
C4-dicarboxylate transport protein	-0.0979396	0.0539052
Calcium-gated potassium channel TvoK	0.0507555	0.318675
Cell division protein C	-0.0090483	0.85899
Cell division protein CrgA	-0.109737	0.0306862
Chorismate dehydratase	0.033627	0.508981
CRISPR system Cmr endoribonuclease Cmr4	0.069139	0.174111
CRISPR system Cms endoribonuclease Csm3	-0.149911	0.00307523
CRISPR system Cms protein Csm4	-0.171547	0.000690394
CRISPR system single-strand-specific deoxyribonuclease Cas10/Csm1 (subtype III-A)	-0.141743	0.00515572
CRISPR-associated endonuclease Cas1 2	-0.106223	0.0364807
Cytochrome c6	0.0878864	0.083823
D-gluconate dehydratase	-0.0845582	0.0962705
Desampylase	-0.0721901	0.155828
Dissimilatory sulfite reductase	-0.124978	0.0137585
DNA double-strand break repair helicase HerA	0.130764	0.00992234
DNA topoisomerase 4 subunit B	0.0109603	0.829609
DNA-directed RNA polymerase subunit A'	-0.0741695	0.144767
DNA-directed RNA polymerase subunit E'	-0.0312018	0.540028
F420-non-reducing hydrogenase iron-sulfur subunit D	0.0588376	0.247588
Ferredoxin/F(420)H(2)-dependent CoB-CoM heterodisulfide reductase subunit A	-0.0952412	0.0608967
Formate dehydrogenase subunit beta	-0.0291862	0.566531
Fructose-6-phosphate aldolase	0.015966	0.753901
Geranylfarnesyl diphosphate synthase	0.00717366	0.887988
Glucose import system permease protein GlcT	-0.103489	0.0416115
GTP cyclohydrolase FolE2	-0.0157739	0.75677
Halolysin-like extracellular serine protease Nep	-0.0406167	0.424984
Heterodisulfide reductase subunit A-like protein	0.016053	0.752604
Homocitrate synthase	0.022559	0.657778
Hydroxymethylglutaryl-CoA synthase	0.0811975	0.110292
Isocitrate--homoisocitrate dehydrogenase	-0.167323	0.000937607
Isopentenyl-diphosphate Delta-isomerase.1.1	0.0524505	0.302761
L-aspartate oxidase	-0.120178	0.0178755
L-cysteine:1D-myo-inositol 2-amino-2-deoxy-alpha-D-glucopyranoside ligase	-0.0621074	0.222235
L-fuculokinase	-0.0253813	0.618187
L-seryl-tRNA(Sec) kinase	0.0182973	0.719383
Maleate isomerase	0.0990536	0.0512201
Manganese-dependent inorganic pyrophosphatase.1.1	0.0521219	0.305804
Metallo-beta-lactamase fold-containing protein	0.0577035	0.256834
Mevalonate kinase	0.0716997	0.158664
Modification methylase MthZI	-0.0579754	0.254596
Monomeric sarcosine oxidase	-0.155197	0.00217113
Monomethylamine methyltransferase MtmB1	0.011316	0.824168
Na(+)-translocating NADH-quinone reductase subunit D	0.0673579	0.185496
NAD(+)-dependent glutamate dehydrogenase	-0.0979859	0.0537913
NAD(P)-dependent glyceraldehyde-3-phosphate dehydrogenase	0.152902	0.00252875
Octanoyltransferase LipM	-0.0292886	0.56517
Ornithine aminotransferase	-0.0352147	0.489173
Phosphoenolpyruvate guanylyltransferase	0.0593684	0.24334
Plastocyanin	-0.0821854	0.106013
Prefoldin subunit alpha	-0.041652	0.413267
Proteasome-activating nucleotidase	-0.0821335	0.106234
Protein AaeX	0.15147	0.00277822
Protein SprT-like protein	-0.0128193	0.801269
Pup--protein ligase	-0.106863	0.0353615
putative flippase AglR	-0.0346833	0.495756
Putative HTH-type transcriptional regulator TrmBL2	0.0731034	0.150647
Putative K(+)-stimulated pyrophosphate-energized sodium pump	0.0393971	0.439031
putative L-aspartate dehydrogenase	-0.102273	0.0440798
putative phosphoglucosamine mutase	-0.0982193	0.0532202
Putative sulfur carrier protein/Ta1414	-0.158742	0.0017087
Putative superoxide reductase	-0.0210253	0.67971
Pyruvate synthase subunit PorC	-0.0457353	0.368949
Reverse gyrase 1	-0.0519825	0.307101
RNA 2'-phosphotransferase	-0.0291769	0.566655
Small archaeal modifier protein 3	-0.0664009	0.191836
Soluble P-type ATPase-like phosphatase	0.0152151	0.765128
Spermidine N(1)-acetyltransferase	-0.0755165	0.13759
Succinylornithine transaminase	0.0985323	0.0524623
Sulfhydrogenase 1 subunit alpha	-0.122222	0.0160068
Sulfite reductase, dissimilatory-type subunit alpha	-0.04612	0.364931
Superoxide reductase	0.0420473	0.408845
Tagatose-6-phosphate kinase	-0.0255613	0.615698
Tetrathionate reductase subunit A	-0.034562	0.497266
Threonine--tRNA ligase	-0.0515708	0.310954
Threonine--tRNA ligase editing subunit	-0.0943882	0.0632569
Toxin RelE3	-0.042474	0.404102
Transcriptional regulator WhiB	-0.0829788	0.102672
Transducer protein BasT	-0.0431296	0.39688
Transducer protein Car	-0.13631	0.0071689
Trehalose-6-phosphate phosphatase-related protein	0.0437189	0.390454
tRNA-Cys(aca)	0.0684272	0.178597
tRNA-Gly(acc)	-0.0902672	0.0757415
tRNA-His(atg)	-0.13235	0.0090525
tRNA-Ile(aat)	-0.000936824	0.985325
tRNA-Val(aac)	-0.0188494	0.71129
Tungsten-containing formaldehyde ferredoxin oxidoreductase	-0.0306837	0.546781
Type-2 restriction enzyme MthTI	-0.102454	0.0437058
Tyrosine recombinase XerS	0.0101668	0.841777
Urease subunit beta	-0.0544688	0.28451
VCP-like ATPase	0.019823	0.697093
Voltage-gated potassium channel	0.0192919	0.704825
Xylose dehydrogenase Gfo6	0.00673298	0.894828
Ycf48-like protein	-0.119791	0.0182504
2-oxoacid:ferredoxin oxidoreductase subunit beta	0.0491819	0.333929
3-hydroxy-5-phosphonooxypentane-2,4-dione thiolase	0.0615352	0.226533
3-methylornithyl-N6-L-lysine dehydrogenase	-0.000629036	0.990146
acetoacetate decarboxylase	0.101788	0.0450991
CRISPR-associated endoribonuclease Cas2 2	-0.056453	0.267304
F420-non-reducing hydrogenase iron-sulfur subunit A	-0.077173	0.129143
Ferredoxin/F(420)H(2)-dependent CoB-CoM heterodisulfide reductase subunit B	0.0433855	0.394081
Hdr-like menaquinol oxidoreductase iron-sulfur subunit	0.0750075	0.14027
Heme oxygenase (staphylobilin-producing)	-0.123672	0.0147869
Methylcobamide:CoM methyltransferase MtaA	0.0176658	0.728682
Phenylalanine--tRNA ligase beta subunit	0.0419443	0.409994
putative homocitrate synthase AksA	0.0682035	0.180024
Renalase	0.0581715	0.25299
Ribulose bisphosphate carboxylase	0.0725598	0.153715
Sulfhydrogenase 1 subunit delta	-0.0456137	0.370224
Sulfofructose kinase	0.0892203	0.0792136
transaldolase.1	0.0573416	0.259835
Tricorn protease-interacting factor F2	-0.00646121	0.89905
tRNA-Asp(atc)	-0.0252316	0.620261
tRNA-Pyl(cta)	0.0513659	0.312882
1,4-alpha-glucan branching enzyme	-0.0750082	0.140266
2-oxoacid:ferredoxin oxidoreductase subunit alpha	-0.0741891	0.144661
Acetyl-CoA decarbonylase/synthase complex subunit alpha 2	-0.0658314	0.195683
Aminodeoxyfutalosine synthase	0.0479107	0.346588
Broad specificity amino-acid racemase	-0.00390293	0.938917
Carnitinyl-CoA dehydratase	-0.00166297	0.973953
Cell division protein FtsP	0.106495	0.0360015
Coenzyme F(430) synthetase	0.191686	0.000145353
CRISPR-associated helicase Cas3	0.00111325	0.982561
Crotonobetaine/carnitine--CoA ligase	-0.0407301	0.423691
Cytochrome b6-f complex subunit 4	0.0300587	0.554982
Dihydroneopterin 2',3'-cyclic phosphate phosphodiesterase	-0.0658154	0.195792
DNA ligase B	0.11765	0.0204482
Enolase-phosphatase E1	-0.00462785	0.9276
Exosome complex component Rrp4	0.0914639	0.0719252
F420-non-reducing hydrogenase vhc subunit A	-0.0522916	0.30423
Ferredoxin:CoB-CoM heterodisulfide reductase subunit C	0.0234927	0.644567
Geranylgeranylglyceryl phosphate synthase	0.166228	0.0010139
Glucose/galactose 1-dehydrogenase	-0.014741	0.772243
Homoserine O-succinyltransferase	0.0409759	0.420898
Lipase chaperone	0.0731034	0.150647
Minichromosome maintenance protein MCM	-0.171046	0.000716152
NAD-dependent glucose-6-phosphate dehydrogenase	-0.043208	0.396021
NAD(P)H-quinone oxidoreductase subunit J, chloroplastic	0.0907267	0.0742572
NADP(+)-dependent glutamate dehydrogenase	0.0226441	0.656569
Putative dimethyl sulfoxide reductase chaperone	0.029167	0.566786
putative N-glycosylase/DNA lyase	0.0214623	0.673431
S-adenosyl-L-methionine-binding protein	0.0509619	0.316708
Superoxide dismutase [Mn] 1	0.110065	0.0301871
Tk-subtilisin	-0.097447	0.0551292
tRNA-Ser(aga)	0.00722211	0.887236
Tungsten-containing formylmethanofuran dehydrogenase 2 subunit G	0.0462425	0.363657
Type-2 restriction enzyme MjaII	0.113563	0.0252886
3-keto-L-gulonate-6-phosphate decarboxylase UlaD	0.074466	0.143164
3-phenylpropionate/cinnamic acid dioxygenase subunit alpha	0.108851	0.032067
3-phenylpropionate/cinnamic acid dioxygenase subunit beta	0.0622002	0.221544
acetate kinase.1	0.0429597	0.398744
Acetate kinase.1.1	0.0721391	0.156121
Acetyl-CoA decarbonylase/synthase complex subunit alpha 1	0.0978786	0.0540555
Archaeal glycosylation protein Q	-0.0197099	0.698737
Aspartate/glutamate leucyltransferase	-0.04538	0.372684
Bifunctional IPC transferase and DIPP synthase	0.0174232	0.732264
Carbamoyl-phosphate synthase	0.0198453	0.696769
Carnitine monooxygenase oxygenase subunit	0.0900816	0.0763478
Cyclic 2,3-diphosphoglycerate synthetase	0.0190596	0.708216
Deoxyhypusine synthase-like protein	0.0842145	0.0976359
DNA polymerase	0.0935906	0.0655313
DNA-directed RNA polymerase subunit E	0.0661963	0.193212
F420-non-reducing hydrogenase subunit A	0.00408447	0.936082
Ferredoxin:CoB-CoM heterodisulfide reductase subunit A	0.120836	0.0172541
Glucosyl-dolichyl phosphate glucuronosyltransferase	-0.0415489	0.414426
H(2)/formate:CoB-CoM heterodisulfide,ferredoxin reductase subunit B1	-0.113285	0.0256515
L-aspartate decarboxylase	-0.0243714	0.632235
Leucyl aminopeptidase	0.0146635	0.773407
Lysine--tRNA ligase	0.0660913	0.193921
[truncated: 394 more rows]
