# Supplementary material for: The Archaeome's Role in Colorectal Cancer: Unveiling the DPANN Group and Investigating Archaeal Functional Signatures
Source: Preprints.org preprint supplement (doi:10.20944/preprints202308.1572.v1), 2023-08-22
Supplement: Supplementary file 7 [file Supplementary data S7 (Uniprot annotation).xlsx]

## Sheet: Uniprot annotation
Proteins	Correlation Type	Spearman's Correlation coefficient (r)	p-value	Uniprot annotation
				%of UniprotKB search results with taxonomy : cellular organisms (ID: 131567) and query : protein	UniprotKB search results with taxonomy : cellular organisms (ID: 131567) and query : protein
Glutamate mutase epsilon subunit	Positively correlated	0.278171	2.51822e-08	100	349Archaea 1,883Bacteria
Translational regulator CsrA	Negatively correlated	-0.255172	3.49338e-07	99	30Archaea 25,816Bacteria 14Eukaryota
2-phosphosulfolactate phosphatase	Positively correlated	0.245129	1.02041e-06	99	512Archaea 9,583Bacteria 37Eukaryota
Kynureninase	Positively correlated	0.232414	3.7143e-06	99	296Archaea 15,380Bacteria 3,605Eukaryota
Pyridoxal 5'-phosphate synthase subunit PdxS	Negatively correlated	-0.229995	4.71094e-06	99	3,743Archaea 25,216Bacteria 2,599Eukaryota
L-lysine 2,3-aminomutase	Positively correlated	0.229867	4.77011e-06	100	2,291Archaea 51,121Bacteria 478Eukaryota
putative nitrogen regulatory PII-like protein	Negatively correlated	-0.22681	6.4172e-06	100	144Archaea97% 2Bacteria1% 2Eukaryota1%
Putative ammonium transporter	Negatively correlated	-0.225998	6.93815e-06	99	20Archaea 191Bacteria 505Eukaryota
Chemotaxis protein CheA	Negatively correlated	-0.218847	1.36312e-05	99	3,233Archaea 130,767Bacteria 100Eukaryota
Flagellar assembly factor FliW	Negatively correlated	-0.218098	1.46112e-05	99	14Archaea 7,894Bacteria 10Eukaryota
Accessory gene regulator protein B	Negatively correlated	-0.215161	1.91419e-05	97	1Archaea 822Bacteria 19Eukaryota
glycine dehydrogenase (decarboxylating) subunit 2	Positively correlated	0.21483	1.97293e-05	100	1,074Archaea 50,807Bacteria 3,167Eukaryota
Chemoreceptor glutamine deamidase CheD	Negatively correlated	-0.213588	2.20871e-05	99	807Archaea 12,817Bacteria 10Eukaryota
DNA polymerase PolB subunit 2	Positively correlated	0.212683	2.39714e-05	100	1,394Archaea 164,314,094Bacteria 13,143Eukaryota
Pyridoxal 5'-phosphate synthase subunit PdxT	Negatively correlated	-0.209075	3.31066e-05	99	3,802Archaea 25,141Bacteria 2,016Eukaryota
RNA 2',3'-cyclic phosphodiesterase	Positively correlated	0.20881	3.38929e-05	99	2,841Archaea 32,093Bacteria 8,052Eukaryota
Hydroxyethylthiazole kinase	Negatively correlated	-0.207794	3.70774e-05	100	645Archaea 13,635Bacteria 1,818Eukaryota
Anthranilate phosphoribosyltransferase	Negatively correlated	-0.201491	6.40999e-05	99	2,230Archaea 46,500Bacteria 3,081Eukaryota
S-adenosyl-L-methionine-dependent uroporphyrinogen III methyltransferase	Negatively correlated	-0.198858	8.01747e-05	99	1,547Archaea 40,828Bacteria 650Eukaryota
Glycogen debranching enzyme	Negatively correlated	-0.198809	8.05118e-05	99	1,444Archaea 60,899Bacteria 7,503Eukaryota
N-(5'-phosphoribosyl)anthranilate isomerase	Negatively correlated	-0.197103	9.29282e-05	99	Archaea 37,627Bacteria 2,115Eukaryota
NAD(P)H-hydrate epimerase	Negatively correlated	-0.196614	9.68035e-05	99	3,238Archaea 45,029Bacteria 7,958Eukaryota
3-dehydroquinate dehydratase	Negatively correlated	-0.195172	0.000109144	99	4,299Archaea 101,921Bacteria 6,984Eukaryota
Geranylgeranyl diphosphate synthase	Negatively correlated	-0.195005	0.000110661	99	12,448Archaea 70,119Bacteria 16,591Eukaryota
Glutamate formimidoyltransferase	Positively correlated	0.194649	0.000113975	98	626Archaea 6,089Bacteria 1,626Eukaryota
Acetyl-coenzyme A carboxylase carboxyl transferase subunit beta, chloroplastic	Negatively correlated	-0.194564	0.000114779	100	41Archaea 64,429Bacteria 15,763Eukaryota
Isopentenyl-diphosphate Delta-isomerase.1	Negatively correlated	-0.192908	0.000131543	99	3,379Archaea 28,653Bacteria 5,156Eukaryota
Coenzyme F(430) synthetase	Positively correlated	0.191686	0.000145353	100	15Archaea94% 1Eukaryota6%
glycine dehydrogenase (decarboxylating) subunit 1	Positively correlated	0.1905	0.000160052	100	1,058Archaea 37,963Bacteria 3,195Eukaryota
Indole-3-glycerol phosphate synthase	Negatively correlated	-0.186399	0.000222327	99	6,548Archaea 124,570Bacteria 3,635Eukaryota
UTP--glucose-1-phosphate uridylyltransferase AglF	Negatively correlated	-0.18603	0.000228928	100	83Archaea97% 3Bacteria3%
Acetyl-coenzyme A carboxylase carboxyl transferase subunit alpha	Negatively correlated	-0.185028	0.000247769	100	21Archaea 64,615Bacteria 15,530Eukaryota
Tryptophan synthase alpha chain	Negatively correlated	-0.184451	0.000259266	99	4,800Archaea 118,902Bacteria 3,667Eukaryota
M18 family aminopeptidase 2	Negatively correlated	-0.183361	0.000282349	100	165Archaea 164,314,094Bacteria 5,113Eukaryota
Alpha-glucosidase	Negatively correlated	-0.183354	0.000282521	99	3,263Archaea 117,944Bacteria 48,483Eukaryota
Na(+)/H(+) antiporter NhaB	Negatively correlated	-0.183156	0.000286918
Isopropylmalate/citramalate isomerase small subunit	Negatively correlated	-0.182934	0.000291913	100	20Archaea63% 11Bacteria34% 1Eukaryota3%
Alpha-amylase MalA	Negatively correlated	-0.181709	0.00032105	100	4Archaea11% 33Bacteria89%
Sec-independent protein translocase protein TatB	Negatively correlated	-0.181496	0.00032638	100	14Archaea 68,354Bacteria 1,170Eukaryota
FKBP-type peptidyl-prolyl cis-trans isomerase	Negatively correlated	-0.181265	0.000332248	99	5,536Archaea 142,102Bacteria 39,837Eukaryota
septum site-determining protein MinC	Negatively correlated	-0.181086	0.00033687	100	3Archaea 32,340Bacteria 136Eukaryota
Putrescine aminotransferase	Positively correlated	0.180114	0.000363046	99	25Archaea 4,743Bacteria 88Eukaryota
Urocanate hydratase	Positively correlated	0.179933	0.000368116	99	997Archaea 23,781Bacteria 1,578Eukaryota
Cell division topological specificity factor	Negatively correlated	-0.179838	0.00037081	100	4Archaea 13,720Bacteria 1,002Eukaryota
tRNA-cytidine(32) 2-sulfurtransferase	Negatively correlated	-0.179173	0.000390161	99	13Archaea 20,431Bacteria 1,043Eukaryota
Butyryl-CoA:acetate CoA-transferase	Negatively correlated	-0.178851	0.000399854	100	4Archaea 2,253Bacteria 6Eukaryota
Peptide methionine sulfoxide reductase MsrB	Positively correlated	0.178379	0.000414506	99	1,793Archaea 49,476Bacteria 7,220Eukaryota
Glycine/sarcosine/betaine reductase complex component A	Positively correlated	0.177428	0.000445503	99	1Archaea 1,546Bacteria 1Eukaryota
Thiazole synthase	Negatively correlated	-0.177165	0.000454448	99	3,214Archaea 69,725Bacteria 4,229Eukaryota
ATP synthase subunit b	Negatively correlated	-0.175615	0.00051065	100	34,136Archaea 706,779Bacteria 1,977,745Eukaryota
Lipoate-protein ligase A	Positively correlated	0.175523	0.000514215	100	546Archaea 10,888Bacteria 2,122Eukaryota
Isopropylmalate/citramalate isomerase large subunit	Negatively correlated	-0.175512	0.000514634	99	691Archaea 49Bacteria
Sulfate adenylyltransferase subunit 1	Negatively correlated	-0.175202	0.000526715	98	2,409Archaea 44,147Bacteria 1,483Eukaryota
Nitrogen fixation nifHD region glnB-like protein 1	Negatively correlated	-0.174691	0.000547205		13Archaea43% 17Bacteria57%
Glutamyl-tRNA reductase	Negatively correlated	-0.174667	0.000548171	99	3,708Archaea 60,227Bacteria 4,909Eukaryota
Dihydroneopterin aldolase	Positively correlated	0.174629	0.000549735	99	1,661Archaea 39,944Bacteria 2,059Eukaryota
Sodium/calcium exchanger MaX1	Negatively correlated	-0.174183	0.000568282	100	20Archaea54% 3Bacteria8% 14Eukaryota38%
phosphoketolase	Negatively correlated	-0.174152	0.000569585	99	18Archaea 13,792Bacteria 1,540Eukaryota
DNA-directed RNA polymerase subunit K	Positively correlated	0.1738	0.0005847	6	3,112Archaea 5,741Bacteria 6,435Eukaryota
Archaeal actin	Negatively correlated	-0.173529	0.000596572	82	536Archaea 1,160Bacteria 43Eukaryota
Nitrogen fixation nifHD region glnB-like protein 2	Negatively correlated	-0.173118	0.000614983	100	14Archaea 164,314,094Bacteria
5-methyltetrahydropteroyltriglutamate--homocysteine methyltransferase	Negatively correlated	-0.172293	0.000653579	99	2,796Archaea 39,374Bacteria 5,229Eukaryota
Ketoisovalerate oxidoreductase subunit VorC	Positively correlated	0.172055	0.000665112	97	58Archaea 11Bacteria
Digeranylgeranylglyceryl phosphate synthase	Positively correlated	0.172051	0.000665293	99	1,555Archaea 161Bacteria 201Eukaryota
CRISPR system Cms protein Csm4	Negatively correlated	-0.171547	0.000690394	100	261Archaea17% 1,290Bacteria83%
Flagellar hook-basal body complex protein FliE	Negatively correlated	-0.171204	0.000707927	99	197Archaea 20,742Bacteria 16Eukaryota
Minichromosome maintenance protein MCM	Negatively correlated	-0.171046	0.000716152	100	920Archaea 17Bacteria 714Eukaryota
3-isopropylmalate/3-methylmalate dehydrogenase	Negatively correlated	-0.171	0.000718585		92Archaea84% 17Bacteria16%
Glycosyltransferase AglD	Negatively correlated	-0.170973	0.000719994	99	548Archaea 358Bacteria 2Eukaryota
30S ribosomal protein S19e	Positively correlated	0.17083	0.00072756	99	3,034Archaea 39Bacteria 36Eukaryota
Bacteriohemerythrin	Negatively correlated	-0.170656	0.000736891	99	127Archaea 12,136Bacteria 378Eukaryota
Polyamine aminopropyltransferase	Negatively correlated	-0.170273	0.000757703	100	963Archaea 21,746Bacteria 79Eukaryota
Pyruvate synthase subunit PorA	Negatively correlated	-0.170032	0.000771116	98	153Archaea 716Bacteria 1Eukaryota
Chemotaxis protein CheY	Negatively correlated	-0.169875	0.000779992	100	1,927Archaea 134,439Bacteria 1,526Eukaryota
Glyceraldehyde-3-phosphate dehydrogenase	Positively correlated	0.169833	0.000782378	99	24,608Archaea 668,530Bacteria 84,317Eukaryota
2-oxoglutarate synthase subunit KorA	Positively correlated	0.169544	0.000798949	95	637Archaea 2,033Bacteria
putative MFS-type transporter YcaD	Positively correlated	0.169518	0.000800433	99	3Archaea 668Bacteria
Acetylglutamate kinase	Negatively correlated	-0.169279	0.00081445	99	13,375Archaea 212,274Bacteria 15,818Eukaryota
putative cyclic pyranopterin monophosphate synthase	Negatively correlated	-0.16922	0.000817945	93	23Archaea 3Bacteria
Chorismate pyruvate-lyase	Positively correlated	0.168713	0.000848428	99	401Archaea 13,133Bacteria 31Eukaryota
D-tagatose-1,6-bisphosphate aldolase subunit KbaZ	Positively correlated	0.168492	0.000862062	100	1Archaea 5,015Bacteria 5Eukaryota
Antiholin-like protein LrgA	Negatively correlated	-0.168407	0.000867375	99	26Archaea 2,195Bacteria
Aspartate--tRNA(Asp) ligase	Negatively correlated	-0.168338	0.000871686	99	6,672Archaea 59,166Bacteria 9,845Eukaryota
Isocitrate--homoisocitrate dehydrogenase	Negatively correlated	-0.167323	0.000937607	99	132Archaea 319Bacteria 1,240Eukaryota
Ferredoxin:CoB-CoM heterodisulfide reductase subunit B	Positively correlated	0.166543	0.000991408	100	5,334Archaea 399Bacteria 2Eukaryota
Geranylgeranylglyceryl phosphate synthase	Positively correlated	0.166228	0.0010139	99	3,778Archaea 2,574Bacteria 1Eukaryota
Subtilisin-like serine protease	Negatively correlated	-0.165329	0.00108074	99	9,124Archaea 117,454Bacteria 54,176Eukaryota
ORC1-type DNA replication protein 2	Positively correlated	0.165146	0.00109483	100	1,640Archaea 164,314,094Bacteria 417Eukaryota
ATP synthase epsilon chain	Negatively correlated	-0.164716	0.00112862	100	94Archaea 198,689Bacteria 98,306Eukaryota
Imidazole glycerol phosphate synthase subunit HisF	Negatively correlated	-0.164427	0.00115186	99	4,514Archaea 77,752Bacteria 1,999Eukaryota
Aryldialkylphosphatase	Positively correlated	0.163088	0.00126544	99	45Archaea 1,863Bacteria 78Eukaryota
ATP synthase subunit delta	Negatively correlated	-0.16296	0.00127685	99	173Archaea 247,145Bacteria 130,183Eukaryota
Arginine deiminase	Positively correlated	0.162731	0.00129744	99	776Archaea 40,306Bacteria 5,533Eukaryota
Pyridoxine/pyridoxamine 5'-phosphate oxidase	Positively correlated	0.162434	0.00132459	99	120Archaea 29,655Bacteria 4,168Eukaryota
2-oxoacid:ferredoxin oxidoreductase 2, subunit beta	Negatively correlated	-0.162372	0.00133035
Cobalamin biosynthesis protein CbiB	Negatively correlated	-0.162221	0.00134434	99	1,527Archaea 22,482Bacteria 17Eukaryota
Aspartyl/glutamyl-tRNA(Asn/Gln) amidotransferase subunit B	Negatively correlated	-0.162038	0.00136163	99	1,527Archaea 22,482Bacteria 17Eukaryota
Putative L(+)-tartrate dehydratase subunit beta	Negatively correlated	-0.161933	0.00137156
Anthranilate synthase component 1	Negatively correlated	-0.161895	0.00137522	99	2,583Archaea 76,543Bacteria 4,855Eukaryota
Pseudouridine-5'-phosphate glycosidase	Positively correlated	0.161638	0.00139995	99	5Archaea 9,872Bacteria 753Eukaryota
Tetrahydromethanopterin S-methyltransferase subunit C	Positively correlated	0.161477	0.0014157	99	462Archaea 14Bacteria
Coenzyme F420-dependent sulfite reductase	Negatively correlated	-0.161318	0.0014314
Hypoxanthine DNA glycosylase	Negatively correlated	-0.160478	0.0015169	100	4Archaea2% 199Bacteria94% 8Eukaryota4%
L-arabinose 1-dehydrogenase (NAD(P)(+))	Negatively correlated	-0.160154	0.00155114
lipid II flippase MurJ	Negatively correlated	-0.160065	0.00156065	100	33Archaea 47,341Bacteria 126Eukaryota
Acylphosphatase	Negatively correlated	-0.1595	0.00162243	99	4,797Archaea 48,628Bacteria 4,783Eukaryota
ATP synthase subunit alpha	Negatively correlated	-0.15901	0.00167768	100	21,954Archaea 606,452Bacteria 168,006Eukaryota
Putative sulfur carrier protein/Ta1414	Negatively correlated	-0.158742	0.0017087		achaea 100%
Peptide chain release factor 3	Negatively correlated	-0.15821	0.00177178	99	3,357Archaea 31,338Bacteria 7,329Eukaryota
Quinate/shikimate dehydrogenase	Negatively correlated	-0.158177	0.00177587	99	3,335Archaea 63,326Bacteria 4,329Eukaryota
putative membrane protein	Negatively correlated	-0.158009	0.00179624	98	12,168Archaea 632,891Bacteria 381,977Eukaryota
NAD-dependent protein deacylase sirtuin-5, mitochondrial	Positively correlated	0.157564	0.00185129	98	1,328Archaea 32,596Bacteria 3,929Eukaryota
Polyphosphate kinase	Negatively correlated	-0.157059	0.00191567	99	1,111Archaea 85,441Bacteria 19,733Eukaryota
Dihydroxy-acid dehydratase	Negatively correlated	-0.157042	0.00191788	99	2,085Archaea 63,475Bacteria 5,064Eukaryota
NAD-dependent protein deacylase 2	Negatively correlated	-0.157031	0.00191933	100	1,262Archaea 164,314,094Bacteria 6,426Eukaryota
Sensory rhodopsin I transducer	Negatively correlated	-0.156731	0.00195857	100	40Archaea80% 7Bacteria14% 3Eukaryota6%
Translation initiation factor 6	Positively correlated	0.156412	0.00200117	98	4,981Archaea 38,976Bacteria 33,865Eukaryota
UDP-N-acetyl-D-mannosaminuronic acid transferase	Positively correlated	0.156121	0.00204072	99	29Archaea 23,710Bacteria 10Eukaryota
HTH-type transcriptional regulator LrpA	Negatively correlated	-0.156101	0.00204345	100	54Archaea56% 43Bacteria44%
Translation initiation factor 1A	Positively correlated	0.155991	0.00205872	99	3,940Archaea 42,502Bacteria 18,814Eukaryota
Phosphoenolpyruvate-protein phosphotransferase	Negatively correlated	-0.155693	0.00210024	100	991Archaea 322,295Bacteria 787Eukaryota
Histidinol dehydrogenase	Negatively correlated	-0.15565	0.00210628	99	9,939Archaea 489,549Bacteria 76,712Eukaryota
tRNA N6-adenosine threonylcarbamoyltransferase	Negatively correlated	-0.155604	0.00211278	99	3,320Archaea 87,417Bacteria 7,851Eukaryota
Beta-galactosidase BgaH	Negatively correlated	-0.155544	0.00212135	100	100% archaea
Adenosine deaminase	Negatively correlated	-0.155501	0.00212741	99	5,657Archaea 124,087Bacteria 40,571Eukaryota
Monomeric sarcosine oxidase	Negatively correlated	-0.155197	0.00217113	99	19Archaea 998Bacteria 59Eukaryota
ATP synthase subunit beta	Negatively correlated	-0.154681	0.00224735	100	24,216Archaea 533,028Bacteria 165,473Eukaryota
Altronate oxidoreductase	Negatively correlated	-0.154667	0.00224937	99	61Archaea 13,038Bacteria 871Eukaryota
ATP synthase gamma chain	Negatively correlated	-0.154598	0.00225979	100	290Archaea 160,219Bacteria 92,219Eukaryota
Bifunctional thiamine biosynthesis protein ThiDN	Negatively correlated	-0.154341	0.00229874	97	102Archaea 14Bacteria
manganese-dependent inorganic pyrophosphatase	Negatively correlated	-0.15417	0.00232507	99	548Archaea 9,774Bacteria 122Eukaryota
Serine/threonine-protein kinase PknD	Negatively correlated	-0.154141	0.0023296	99	44Archaea 2,080Bacteria 5Eukaryota
Holliday junction resolvase RecU	Negatively correlated	-0.154012	0.00234954	98	12Archaea 5,484Bacteria 6Eukaryota
Imidazoleglycerol-phosphate dehydratase	Negatively correlated	-0.153506	0.00242974	99	1,807Archaea 36,732Bacteria 2,550Eukaryota
Ribonuclease Z	Negatively correlated	-0.153385	0.00244927	99	42,637Archaea 558,345Bacteria 67,692Eukaryota
Carbonic anhydrase	Negatively correlated	-0.153248	0.0024716	99	2,957Archaea 105,272Bacteria 41,406Eukaryota
Chlorinase	Positively correlated	0.153172	0.00248407	99	1,612Archaea 12,651Bacteria 15Eukaryota
D-amino acid dehydrogenase	Negatively correlated	-0.153157	0.00248648	99	8,668Archaea 372,178Bacteria 32,570Eukaryota
NAD(P)-dependent glyceraldehyde-3-phosphate dehydrogenase	Positively correlated	0.152902	0.00252875	99	19,007Archaea 497,944Bacteria 75,617Eukaryota
Flagellar brake protein YcgR	Negatively correlated	-0.152899	0.00252918	99	5Archaea 10,342Bacteria 5Eukaryota
Amidase	Negatively correlated	-0.152839	0.00253931	98	9,208Archaea 609,211Bacteria 74,881Eukaryota
50S ribosomal protein L14e	Positively correlated	0.15269	0.0025644	100	1,285Archaea 144Bacteria 47Eukaryota
Sulfur carrier protein FdhD	Negatively correlated	-0.152584	0.00258239	99	1,524Archaea 26,031Bacteria 6Eukaryota
16S ribosomal RNA	Positively correlated	0.152452	0.00260488	100	13,137Archaea 631,732Bacteria 28,683Eukaryota
Phosphosulfolactate synthase	Positively correlated	0.1522	0.00264836	99	339Archaea 3,455Bacteria 814Eukaryota
tRNA pseudouridine synthase B	Negatively correlated	-0.151477	0.00277697	99	6,947Archaea 91,504Bacteria 22,659Eukaryota
Protein AaeX	Positively correlated	0.15147	0.00277822	100	1Archaea 1,605Bacteria
Kynurenine 3-monooxygenase	Positively correlated	0.151004	0.00286417	100	19Archaea 4,441Bacteria 4,163Eukaryota
Translation initiation factor 5A	Positively correlated	0.15093	0.00287798	99	3,117Archaea 86Bacteria 6,826Eukaryota
2-amino-5-formylamino-6-ribosylaminopyrimidin-4(3H)-one 5'-monophosphate deformylase	Positively correlated	0.150902	0.00288321
Chaperone modulatory protein CbpM	Positively correlated	0.150814	0.00289995	99	1Archaea 2,250Bacteria 1Eukaryota
Enolase	Negatively correlated	-0.150787	0.00290502	99	8,918Archaea 204,853Bacteria 32,780Eukaryota
50S ribosomal protein L40e	Positively correlated	0.150651	0.00293078	99	2,704Archaea 94Bacteria 17Eukaryota
Dihydrofolate reductase HdrA	Negatively correlated	-0.150589	0.00294263		100% archaea
Bifunctional uridylyltransferase/uridylyl-removing enzyme	Negatively correlated	-0.150409	0.00297741	98	24Archaea 24,809Bacteria 226Eukaryota
CRISPR system Cms endoribonuclease Csm3	Negatively correlated	-0.149911	0.00307523	99	933Archaea 5,681Bacteria
Chromosome partition protein Smc	Negatively correlated	-0.149659	0.00312577	99	3,544Archaea 63,262Bacteria 452Eukaryota
Cobyrinate a,c-diamide synthase	Negatively correlated	-0.148977	0.00326661	99	1,900Archaea 19,356Bacteria 115Eukaryota
GTP-sensing transcriptional pleiotropic repressor CodY	Negatively correlated	-0.148972	0.00326763	100	1Archaea 4,549Bacteria 2Eukaryota
1-phosphofructokinase	Negatively correlated	-0.14893	0.00327645	99	1,254Archaea 82,259Bacteria 15,951Eukaryota
Replication factor C small subunit	Negatively correlated	-0.148899	0.00328303	25	5,966Archaea 118Bacteria 9,855Eukaryota
Tetrahydromethanopterin S-methyltransferase subunit G	Positively correlated	0.14876	0.00331257	100	412Archaea 46Bacteria
tRNA-dihydrouridine(16) synthase	Negatively correlated	-0.148527	0.00336255	100	12Archaea 6,682Bacteria 4,417Eukaryota
F420-non-reducing hydrogenase subunit G	Positively correlated	0.148523	0.00336351	98	1,160Archaea 5,388Bacteria 6Eukaryota
Cobyric acid synthase	Negatively correlated	-0.148399	0.00339029	99	1,559Archaea 22,153Bacteria 66Eukaryota
Tetrahydromethanopterin S-methyltransferase subunit H	Positively correlated	0.148298	0.00341245	99	1,170Archaea 166Bacteria 1Eukaryota
Citrate synthase	Negatively correlated	-0.148198	0.00343442	99	3,226Archaea 98,800Bacteria 19,430Eukaryota
Membrane-bound protease	Positively correlated	0.148154	0.00344412	33	3,369Archaea 5,576Bacteria 5,274Eukaryota
Anthranilate synthase component 2	Negatively correlated	-0.148127	0.00345004	100	1,116Archaea 164,314,094Bacteria 3,295Eukaryota
Tetrahydromethanopterin S-methyltransferase subunit B	Positively correlated	0.147439	0.00360541		445Archaea96% 17Bacteria4%
Cobalt-precorrin-5B C(1)-methyltransferase	Negatively correlated	-0.147415	0.00361104	100	1Archaea33% 2Bacteria67%
5-dehydro-2-deoxygluconokinase	Negatively correlated	-0.147326	0.00363148	99	80Archaea 11,766Bacteria 240Eukaryota
Coenzyme F420:L-glutamate ligase	Positively correlated	0.147202	0.00366034
ATP-dependent RNA helicase DbpA	Negatively correlated	-0.146987	0.00371083	99	1,423Archaea 39,924Bacteria 18,076Eukaryota
Phosphoserine phosphatase	Negatively correlated	-0.146612	0.00380053	99	9,399Archaea 299,350Bacteria 23,630Eukaryota
Riboflavin synthase	Positively correlated	0.146547	0.00381633	99	12,894Archaea 387,919Bacteria 74,653Eukaryota
HTH-type transcriptional regulator Ptr1	Negatively correlated	-0.146152	0.00391325		60Archaea88% 8Bacteria12%
Molybdate/tungstate transport system permease protein WtpB	Negatively correlated	-0.146105	0.00392489	99	124Archaea 11Bacteria
Trigger factor	Negatively correlated	-0.145551	0.00406478	94	296Archaea 189,053Bacteria 2,525Eukaryota
Glutamate N-acetyltransferase	Negatively correlated	-0.145406	0.00410232	99	1,555Archaea 45,742Bacteria 5,414Eukaryota
NAD(P)H-quinone oxidoreductase subunit 3, chloroplastic	Positively correlated	0.145307	0.00412785	100	22Archaea 160Bacteria 9,687Eukaryota
DNA polymerase sliding clamp	Positively correlated	0.145099	0.00418224	93	5,473Archaea 53,806Bacteria 77Eukaryota
Alpha-xylosidase	Negatively correlated	-0.145024	0.00420215	99	165Archaea 14,668Bacteria 3,143Eukaryota
23S ribosomal RNA	Positively correlated	0.144987	0.00421195	100	5,662Archaea 255,464Bacteria 16,827Eukaryota
Galactose-1-phosphate uridylyltransferase	Negatively correlated	-0.144904	0.00423394	99	1,248Archaea 23,386Bacteria 3,474Eukaryota
2-amino-3-ketobutyrate coenzyme A ligase	Positively correlated	0.144748	0.00427572	99	46Archaea 22,736Bacteria 4,082Eukaryota
ATP-dependent RNA helicase RhlB	Negatively correlated	-0.144651	0.00430185	99	70Archaea 8,047Bacteria 31Eukaryota
Pyruvate synthase subunit PorD	Negatively correlated	-0.144576	0.00432234	98	2,847Archaea 5,114Bacteria
2,3-bisphosphoglycerate-dependent phosphoglycerate mutase	Negatively correlated	-0.144491	0.00434522	99	786Archaea 23,319Bacteria 3,882Eukaryota
DNA repair protein NreB	Positively correlated	0.144281	0.00440287	100	100% archaea
30S ribosomal protein S8e	Positively correlated	0.143984	0.00448558	99	3,076Archaea 31Bacteria 6Eukaryota
Pantoate kinase	Positively correlated	0.143984	0.00448558	99	4,092Archaea 102,628Bacteria 4,371Eukaryota
Glutamate 5-kinase	Negatively correlated	-0.143652	0.00457973	99	5,453Archaea 93,278Bacteria 8,326Eukaryota
Germination protease	Negatively correlated	-0.14351	0.00462034	100	1Archaea 7,869Bacteria 118Eukaryota
putative Thioredoxin	Positively correlated	0.143494	0.00462504	99	229Archaea 35,521Bacteria 12,261Eukaryota
Coenzyme A biosynthesis bifunctional protein CoaBC	Negatively correlated	-0.143351	0.00466643	100	1,750Archaea 36,474Bacteria 15Eukaryota
Cysteine desulfurase IscS 2	Negatively correlated	-0.143283	0.00468622	100	2,125Archaea 164,314,094Bacteria 1,302Eukaryota
L-arabinose isomerase	Negatively correlated	-0.14305	0.00475476	99	212Archaea 16,787Bacteria 67Eukaryota
ATP-dependent helicase/deoxyribonuclease subunit B	Negatively correlated	-0.142875	0.00480657	99	10Archaea 4,118Bacteria 448Eukaryota
Elongation factor G, mitochondrial	Negatively correlated	-0.142484	0.00492469	99	159Archaea 130,155Bacteria 18,273Eukaryota
Putative adenylate kinase	Positively correlated	0.142373	0.00495872	99	1,936Archaea 71Bacteria 825Eukaryota
Acetyl esterase	Negatively correlated	-0.142309	0.00497837	97	1,219Archaea 67,818Bacteria 6,113Eukaryota
Adenine phosphoribosyltransferase	Negatively correlated	-0.142138	0.00503151	99	2,784Archaea 62,861Bacteria 7,524Eukaryota
Ubiquinone biosynthesis accessory factor UbiK	Positively correlated	0.141909	0.00510311	99	2Archaea 7,762Bacteria 5Eukaryota
CRISPR system single-strand-specific deoxyribonuclease Cas10/Csm1 (subtype III-A)	Negatively correlated	-0.141743	0.00515572	99	351Archaea 2,184Bacteria
DNA-binding protein	Positively correlated	0.141677	0.00517658	98	1,149,784Archaea 32,353,572Bacteria 13,022,810Eukaryota
Ribosome maturation protein SDO1	Positively correlated	0.141672	0.00517834	99	3,281Archaea 42Bacteria 4,906Eukaryota
O-succinylhomoserine sulfhydrylase	Negatively correlated	-0.141391	0.0052689	99	13Archaea 13,016Bacteria 21Eukaryota
Error-prone DNA polymerase	Negatively correlated	-0.141298	0.00529915	99	1,462Archaea 76,027Bacteria 5,899Eukaryota
Tetrahydromethanopterin S-methyltransferase subunit E	Positively correlated	0.141225	0.00532304	100	466Archaea91% 46Bacteria9%
Sulfofructosephosphate aldolase	Positively correlated	0.141198	0.00533185	99	67Archaea 5,543Bacteria 6Eukaryota
Galactokinase	Negatively correlated	-0.141034	0.00538561	99	1,546Archaea 29,019Bacteria 7,784Eukaryota
putative aminomethyltransferase	Positively correlated	0.141018	0.00539121	99	7Archaea 198Bacteria 131Eukaryota
Ribosomal RNA small subunit methyltransferase H	Negatively correlated	-0.140913	0.005426	100	1,008Archaea 158,857Bacteria 1,618Eukaryota
GTP-dependent dephospho-CoA kinase	Positively correlated	0.140872	0.0054395	99	2,725Archaea 232Bacteria
Phosphoribosyl-dephospho-CoA transferase	Positively correlated	0.140798	0.0054645	99	65Archaea 3,906Bacteria 1Eukaryota
2-(3-amino-3-carboxypropyl)histidine synthase	Positively correlated	0.140449	0.00558247	100	5,363Archaea 37Bacteria 12,132Eukaryota
Urease accessory protein UreF	Negatively correlated	-0.140335	0.00562158	100	849Archaea 41,297Bacteria 1,590Eukaryota
30S ribosomal protein S15	Positively correlated	0.140307	0.00563118	100	3,187Archaea 42,135Bacteria 13,886Eukaryota
Haloalkane dehalogenase	Negatively correlated	-0.140142	0.00568816	98	100Archaea 7,935Bacteria 327Eukaryota
Hydroxylamine reductase	Negatively correlated	-0.140121	0.00569573	98	2,083Archaea 15,361Bacteria 241Eukaryota
Endonuclease III	Negatively correlated	-0.14011	0.00569932	99	12,100Archaea 206,009Bacteria 10,080Eukaryota
Putative competence-damage inducible protein	Negatively correlated	-0.140003	0.0057367	100	9Archaea 5,781Bacteria 74Eukaryota
5-dehydro-4-deoxyglucarate dehydratase	Positively correlated	0.139914	0.00576817	100	109Archaea 8,107Bacteria 2Eukaryota
ATP phosphoribosyltransferase regulatory subunit	Negatively correlated	-0.139866	0.00578483	100	65Archaea 33,349Bacteria 509Eukaryota
Histidinol-phosphate aminotransferase	Negatively correlated	-0.13929	0.00599128	99	3,700Archaea 84,906Bacteria 2,237Eukaryota
S-ribosylhomocysteine lyase	Negatively correlated	-0.139277	0.00599611	99	3Archaea 10,878Bacteria 6Eukaryota
Phosphocarrier protein HPr	Negatively correlated	-0.139231	0.00601296	100	417Archaea 55,255Bacteria 26Eukaryota
Cell division protein ZapA	Negatively correlated	-0.139066	0.0060735	99	100Archaea 29,018Bacteria 38Eukaryota
Uroporphyrinogen decarboxylase	Positively correlated	0.138861	0.00614948	98	4,743Archaea 65,218Bacteria 5,362Eukaryota
Na(+)/H(+) antiporter 1	Negatively correlated	-0.138777	0.00618085
Sensory rhodopsin II transducer	Negatively correlated	-0.138775	0.00618149	100	79Archaea61% 50Bacteria39%
Ribosomal RNA small subunit methyltransferase F	Negatively correlated	-0.138456	0.00630219	99	201Archaea 31,312Bacteria 218Eukaryota
UV DNA damage endonuclease	Negatively correlated	-0.138405	0.00632152	100	241Archaea 4,232Bacteria 1,262Eukaryota
Sulfopyruvate decarboxylase subunit alpha	Positively correlated	0.138378	0.00633171	98	961Archaea 10,105Bacteria 362Eukaryota
ATP synthase subunit a	Negatively correlated	-0.13834	0.0063463	99	38,509Archaea 908,063Bacteria 2,061,663Eukaryota
Oxygen-dependent choline dehydrogenase	Positively correlated	0.138239	0.00638538	100	7Archaea 4,636Bacteria 489Eukaryota
2-oxoglutarate synthase subunit KorC	Positively correlated	0.138133	0.00642618	98	1,159Archaea 10,054Bacteria 1Eukaryota
50S ribosomal protein L37Ae	Positively correlated	0.138131	0.00642714	100	2,961Archaea 39Bacteria 5Eukaryota
4-hydroxy-2-oxovalerate aldolase	Negatively correlated	-0.138094	0.00644156	99	51Archaea 9,783Bacteria 78Eukaryota
4-O-beta-D-mannosyl-D-glucose phosphorylase	Negatively correlated	-0.138016	0.00647187	99	20Archaea 1,921Bacteria
Thiamine-phosphate synthase	Negatively correlated	-0.137945	0.00649967	99	3,584Archaea 188,080Bacteria 7,224Eukaryota
Ribonuclease R	Negatively correlated	-0.137767	0.00656939	99	1,806Archaea 67,541Bacteria 72,662Eukaryota
2-amino-3,7-dideoxy-D-threo-hept-6-ulosonate synthase	Positively correlated	0.137746	0.00657795	100	2,763Archaea 570Bacteria
Adenosylcobinamide-GDP ribazoletransferase	Negatively correlated	-0.137292	0.00676002	99	1,621Archaea 22,443Bacteria 67Eukaryota
Transaldolase.2	Positively correlated	0.137264	0.00677103	99	2,490Archaea 56,762Bacteria 5,068Eukaryota
DNA topoisomerase 3	Negatively correlated	-0.136674	0.00701471	100	20,245Archaea 1,626,372Bacteria 60,253Eukaryota
Diaminopimelate decarboxylase	Negatively correlated	-0.136663	0.00701922	99	2,162Archaea 77,044Bacteria 12,244Eukaryota
Manganese-dependent inorganic pyrophosphatase.1	Negatively correlated	-0.136639	0.00702962	99	379Archaea 8,201Bacteria 117Eukaryota
3-isopropylmalate dehydrogenase	Negatively correlated	-0.136444	0.00711184	100	1,919Archaea 109,543Bacteria 3,654Eukaryota
Transducer protein Car	Negatively correlated	-0.13631	0.0071689		9Archaea17% 42Bacteria79% 2Eukaryota4%
putative deoxyhypusine synthase	Positively correlated	0.136097	0.0072604	100	209Archaea 81Bacteria 324Eukaryota
Phosphoribosyl-AMP cyclohydrolase	Negatively correlated	-0.135819	0.00738186	99	1,927Archaea 38,422Bacteria 2,140Eukaryota
N-acetylneuraminate epimerase	Positively correlated	0.135807	0.00738705	100	53Archaea 10,086Bacteria 854Eukaryota
5,10-methenyltetrahydromethanopterin hydrogenase	Positively correlated	0.135705	0.00743194	99	251Archaea 5Bacteria
Autoinducer-2 kinase	Positively correlated	0.135694	0.00743651	98	30Archaea 2,831Bacteria 102Eukaryota
Peptidoglycan D,D-transpeptidase FtsI	Negatively correlated	-0.135624	0.00746768	99	31Archaea 52,802Bacteria 62Eukaryota
Nicotinate-nucleotide--dimethylbenzimidazole phosphoribosyltransferase	Negatively correlated	-0.135581	0.00748671	99	1,518Archaea 24,849Bacteria 115Eukaryota
Archaetidylserine synthase	Negatively correlated	-0.135549	0.00750105	98	235Archaea 6Bacteria
2-oxoglutarate synthase subunit KorB	Positively correlated	0.135405	0.00756558	98	1,539Archaea 14,935Bacteria 10Eukaryota
ATP phosphoribosyltransferase	Negatively correlated	-0.13493	0.00778104	99	4,988Archaea 92,317Bacteria 12,601Eukaryota
Ketoisovalerate oxidoreductase subunit VorA	Positively correlated	0.134913	0.00778918	99	115Archaea 75Bacteria 1Eukaryota
Tautomerase PptA	Positively correlated	0.134624	0.00792302	100	3Archaea 2,082Bacteria
Sodium/alanine symporter AgcS	Negatively correlated	-0.134466	0.00799743	100	237Archaea 40,349Bacteria 5Eukaryota
RNA pyrophosphohydrolase	Negatively correlated	-0.134162	0.0081419	99	296Archaea 40,091Bacteria 12,407Eukaryota
2-dehydro-3-deoxy-phosphogluconate/2-dehydro-3-deoxy-6-phosphogalactonate aldolase	Positively correlated	0.133997	0.00822128	99	614Archaea 38,587Bacteria 552Eukaryota
Epoxyqueuosine reductase QueH	Negatively correlated	-0.13398	0.0082294	99	614Archaea 38,587Bacteria 552Eukaryota
Stress response kinase A	Negatively correlated	-0.133967	0.00823548	100	12Archaea 28,180Bacteria 17,996Eukaryota
N-acetylglucosaminyldiphosphoundecaprenol N-acetyl-beta-D-mannosaminyltransferase	Negatively correlated	-0.133705	0.00836317	99	4Archaea 5,357Bacteria 2Eukaryota
Phosphoribosylformylglycinamidine synthase	Negatively correlated	-0.133449	0.00848962	99	9,199Archaea 129,987Bacteria 7,115Eukaryota
putative isochorismatase family protein	Positively correlated	0.133429	0.00849993	100	50Archaea 279Bacteria 189Eukaryota
1,4-alpha-glucan branching enzyme GlgB	Negatively correlated	-0.13314	0.00864463	99	153Archaea 34,345Bacteria 4,985Eukaryota
Imidazole glycerol phosphate synthase subunit HisH	Negatively correlated	-0.133026	0.00870271	99	3,563Archaea 76,826Bacteria 1,911Eukaryota
Molybdenum cofactor guanylyltransferase	Negatively correlated	-0.13287	0.00878237	99	3,419Archaea 45,813Bacteria 171Eukaryota
Lon protease	Negatively correlated	-0.132742	0.00884788	99	4,521Archaea 135,983Bacteria 10,888Eukaryota
Archaeal histone A	Positively correlated	0.132651	0.00889501	100	3,880Archaea 102Bacteria 23,734Eukaryota
Cell division protein DivIB	Negatively correlated	-0.132627	0.00890748	99	18Archaea 33,679Bacteria 28Eukaryota
Fructose-bisphosphate aldolase class 1	Positively correlated	0.132623	0.00890969	99	5,034Archaea 60,552Bacteria 13,075Eukaryota
Ketol-acid reductoisomerase (NAD(P)(+))	Negatively correlated	-0.132499	0.00897405
tRNA-His(atg)	Negatively correlated	-0.13235	0.0090525	100	100% archaea
50S ribosomal protein L18e	Positively correlated	0.132337	0.00905928	99	6,131Archaea 42,606Bacteria 3,978Eukaryota
Methyl-coenzyme M reductase I subunit beta	Positively correlated	0.13229	0.00908412	100	661Archaea≈100% 2Eukaryota≈0%
ATP-dependent RNA helicase RhlE	Negatively correlated	-0.131873	0.00930641	99	2,838Archaea 101,895Bacteria 24,880Eukaryota
23S rRNA (guanosine-2'-O-)-methyltransferase RlmB	Negatively correlated	-0.13182	0.00933542
Flagellar transcriptional regulator FlhC	Positively correlated	0.131607	0.00945084	100	1Archaea 8,648Bacteria 3Eukaryota
Cytidylate kinase	Negatively correlated	-0.131503	0.00950803	99	3,229Archaea 92,181Bacteria 6,022Eukaryota
Putative snRNP Sm-like protein	Positively correlated	0.131476	0.00952295	99	2,033Archaea 11Bacteria 71Eukaryota
Trk system potassium uptake protein TrkA	Negatively correlated	-0.131402	0.00956373	98	3,610Archaea 46,738Bacteria 29Eukaryota
Primosomal protein 1	Positively correlated	0.131277	0.00963318	99	34Archaea 59,480Bacteria 51Eukaryota
Shikimate kinase	Negatively correlated	-0.131261	0.00964217	99	2,728Archaea 69,254Bacteria 7,578Eukaryota
Acetyl-CoA decarbonylase/synthase complex subunit gamma	Negatively correlated	-0.13126	0.00964265	99	3,078Archaea 2,656Bacteria 1Eukaryota
Potassium-transporting ATPase potassium-binding subunit	Positively correlated	0.131237	0.00965542	100	1,686Archaea 62,561Bacteria 17,014Eukaryota
Chromosome-anchoring protein RacA	Negatively correlated	-0.131228	0.00966069	99	7Archaea 12,365Bacteria 3Eukaryota
tRNA-Arg(tcg)	Positively correlated	0.131197	0.00967759
Bifunctional ligase/repressor BirA	Negatively correlated	-0.131039	0.00976668	99	43Archaea 13,694Bacteria 1Eukaryota
Lipid III flippase	Positively correlated	0.130854	0.00987089	99	813Archaea 29,759Bacteria 10Eukaryota
Protein-arginine kinase	Negatively correlated	-0.1308	0.00990208	67	1,030Archaea 17,053Bacteria 3,395Eukaryota
DNA double-strand break repair helicase HerA	Positively correlated	0.130764	0.00992234	100	92Archaea94% 5Bacteria5% 1Eukaryota1%
Phosphomethylpyrimidine synthase	Negatively correlated	-0.130717	0.00994919	99	2,174Archaea 29,635Bacteria 1,061Eukaryota
Type-2 restriction enzyme MjaI	Positively correlated	0.130692	0.00996336	100	100% archaea
Putative dimethyl sulfoxide reductase membrane subunit C	Negatively correlated	-0.130562	0.0100384		2Archaea22% 7Bacteria78%
HTH-type transcriptional repressor PurR	Negatively correlated	-0.130501	0.0100738	99	12,405Bacteria 15Eukaryota
N-acetyl-D-glucosamine kinase	Negatively correlated	-0.130326	0.0101751	99	428Archaea 51,908Bacteria 3,463Eukaryota
Glycerate 2-kinase	Negatively correlated	-0.130233	0.0102299	99	409Archaea 41,844Bacteria 1,811Eukaryota
6-phospho-beta-galactosidase	Negatively correlated	-0.130044	0.0103415	99	411Archaea 11,190Bacteria 26Eukaryota
DNA replication terminus site-binding protein	Positively correlated	0.129981	0.0103784	16	4Archaea 20,660Bacteria 522Eukaryota
30S ribosomal protein S28e	Positively correlated	0.129914	0.0104183	99	2,883Archaea 211Bacteria 27Eukaryota
Bifunctional enzyme Fae/Hps	Positively correlated	0.12983	0.0104689	100	647Archaea99% 4Bacteria1%
Urease subunit alpha	Negatively correlated	-0.129746	0.0105194	99	2,190Archaea 103,146Bacteria 5,196Eukaryota
50S ribosomal protein L10e	Positively correlated	0.129644	0.0105806	99	3,378Archaea 41,206Bacteria 19,893Eukaryota
Methyl-coenzyme M reductase I subunit alpha	Positively correlated	0.129559	0.0106325	100	919Archaea≈100% 2Eukaryota≈0%
4-deoxy-L-threo-5-hexosulose-uronate ketol-isomerase	Negatively correlated	-0.129405	0.010726	99	2Archaea 9,058Bacteria 16Eukaryota
Global nitrogen regulator NrpR	Positively correlated	0.129328	0.0107734	98	891Archaea 560Bacteria
Ribosomal RNA small subunit methyltransferase B	Negatively correlated	-0.129284	0.0108006	99	185Archaea 30,689Bacteria 298Eukaryota
Fumarate reductase (CoM/CoB) subunit A	Negatively correlated	-0.129205	0.0108493	99	28Archaea 286Bacteria 7Eukaryota
Methenyltetrahydromethanopterin cyclohydrolase	Positively correlated	0.12919	0.0108586	99	1,447Archaea 1,817Bacteria 4Eukaryota
Molybdate/tungstate-binding protein WtpA	Positively correlated	0.12919	0.0108586	98	1,012Archaea 1,369Bacteria 34Eukaryota
Membrane-bound lytic murein transglycosylase F	Negatively correlated	-0.129158	0.0108782	99	1,152Archaea 163,338Bacteria 432Eukaryota
2-dehydro-3-deoxygluconokinase	Negatively correlated	-0.129157	0.0108792	99	536Archaea 25,744Bacteria 23Eukaryota
Multidrug resistance protein MdtK	Negatively correlated	-0.129095	0.0109172	99	12Archaea 1,997Bacteria 2Eukaryota
GTP cyclohydrolase III	Positively correlated	0.12904	0.0109516	99	1,181Archaea 243Bacteria 25Eukaryota
Pyrimidine/purine nucleoside phosphorylase	Positively correlated	0.128554	0.0112583	99	192Archaea 11,620Bacteria 1,570Eukaryota
GTP 3',8-cyclase	Negatively correlated	-0.128467	0.0113138	99	2,178Archaea 34,105Bacteria 2,763Eukaryota
Aspartate aminotransferase	Negatively correlated	-0.128383	0.011368	99	57,451Archaea 1,493,372Bacteria 209,250Eukaryota
Leucine--tRNA ligase	Negatively correlated	-0.128324	0.0114064	99	7,668Archaea 101,910Bacteria 15,766Eukaryota
Carboxy-S-adenosyl-L-methionine synthase	Negatively correlated	-0.128148	0.0115205	100	3,383Archaea 34,702Bacteria 14Eukaryota
Voltage-gated ClC-type chloride channel ClcB	Negatively correlated	-0.128016	0.0116065	98	51Archaea 1,860Bacteria 2Eukaryota
S-adenosyl-L-methionine-dependent tRNA 4-demethylwyosine synthase	Positively correlated	0.128005	0.0116138	99	2,857Archaea 22Bacteria 3,412Eukaryota
Phosphoribosylformylglycinamidine synthase subunit PurS	Positively correlated	0.127981	0.0116296	100	5,873Archaea 69,546Bacteria 16Eukaryota
Riboflavin kinase	Positively correlated	0.127958	0.0116446	99	2,921Archaea 46,914Bacteria 6,145Eukaryota
Spermidine export protein MdtJ	Positively correlated	0.127838	0.0117238	100	7Archaea 2,976Bacteria 1Eukaryota
Beta-hexosaminidase	Negatively correlated	-0.127749	0.0117835	99	595Archaea 95,284Bacteria 17,717Eukaryota
Protein-glutamate methylesterase/protein-glutamine glutaminase	Negatively correlated	-0.12767	0.0118359	99	1,500Archaea 69,070Bacteria 57Eukaryota
Phosphatidylserine decarboxylase proenzyme 2	Negatively correlated	-0.127462	0.0119757	100	48Archaea 164,314,094Bacteria 5,235Eukaryota
Elongation factor 1-beta	Positively correlated	0.127353	0.0120489	84	4,885Archaea 20,800Bacteria 24,634Eukaryota
Histidine ammonia-lyase	Positively correlated	0.127174	0.0121714	100	4,353Archaea 106,627Bacteria 8,413Eukaryota
Translation initiation factor 2 subunit beta	Positively correlated	0.127128	0.0122027	100	5,390Archaea 164,314,094Bacteria 19,109Eukaryota
Selenide, water dikinase	Negatively correlated	-0.127128	0.0122029	99	246Archaea 20,311Bacteria 2,770Eukaryota
Pyrroline-5-carboxylate reductase	Negatively correlated	-0.127117	0.0122105	99	3,666Archaea 111,401Bacteria 16,612Eukaryota
Acetyl-CoA decarbonylase/synthase complex subunit delta 1	Negatively correlated	-0.127097	0.0122242	99	2,390Archaea 2,001Bacteria 1Eukaryota
tRNA(Met) cytidine acetate ligase	Negatively correlated	-0.12703	0.0122699	99	163Archaea 8,007Bacteria 2Eukaryota
Coenzyme F420 hydrogenase subunit gamma	Negatively correlated	-0.126942	0.0123309	98	2,138Archaea 6,507Bacteria 2Eukaryota
Pyruvoyl-dependent arginine decarboxylase	Positively correlated	0.126927	0.0123414	98	2,276Archaea 3,157Bacteria 14Eukaryota
[LysW]-L-2-aminoadipate/[LysW]-L-glutamate phosphate reductase	Negatively correlated	-0.126876	0.0123769
Diaminopimelate epimerase	Negatively correlated	-0.12672	0.0124855	99	2,192Archaea 107,890Bacteria 9,015Eukaryota
NAD-specific glutamate dehydrogenase A	Negatively correlated	-0.126697	0.0125014	99	639Archaea 24,153Bacteria 3,951Eukaryota
30S ribosomal protein S3Ae	Positively correlated	0.126659	0.0125281	99	3,037Archaea 28Bacteria 4Eukaryota
Homoserine O-acetyltransferase	Negatively correlated	-0.126653	0.0125327	99	852Archaea 39,369Bacteria 4,770Eukaryota
putative ribosome biogenesis protein	Positively correlated	0.126506	0.0126361		3Archaea≈0% 52Bacteria4% 1,344Eukaryota96%
Archaeosine synthase	Positively correlated	0.126425	0.0126932	100	4,523Archaea 12Bacteria 59Eukaryota
Sulfate adenylyltransferase subunit 2	Negatively correlated	-0.126313	0.0127732	100	2,408Archaea 164,314,094Bacteria 1,270Eukaryota
Ribonuclease Y	Negatively correlated	-0.126002	0.0129972	99	3,411Archaea 53,981Bacteria 7,195Eukaryota
Penicillin-binding protein activator LpoB	Positively correlated	0.125929	0.0130499	100	6Archaea 10,071Bacteria 1Eukaryota
Zinc metalloprotease TldD	Positively correlated	0.125632	0.0132677	99	872Archaea 8Bacteria 20Eukaryota
Homoserine kinase	Negatively correlated	-0.1256	0.0132912	99	6,734Archaea 97,570Bacteria 6,264Eukaryota
Sulfide dehydrogenase subunit alpha	Negatively correlated	-0.125575	0.0133099	99	140Archaea 85Bacteria 2Eukaryota
DNA primase DnaG	Positively correlated	0.125391	0.013447	94	3,366Archaea 63,354Bacteria 4,339Eukaryota
HMP-PP phosphatase	Negatively correlated	-0.125214	0.0135799	99	1Archaea 1,821Bacteria 12Eukaryota
DNA double-strand break repair protein Mre11	Negatively correlated	-0.12502	0.0137265	100	1,161Archaea 113Bacteria 6,996Eukaryota
Dissimilatory sulfite reductase	Negatively correlated	-0.124978	0.0137585	97	696Archaea 35,029Bacteria 16Eukaryota
30S ribosomal protein S4	Positively correlated	0.124967	0.0137671	100	11,181Archaea 125,734Bacteria 51,827Eukaryota
Segregation and condensation protein B	Negatively correlated	-0.124965	0.0137682	99	3,516Archaea 64,385Bacteria 179Eukaryota
RNA polymerase sigma factor RpoS	Negatively correlated	-0.124947	0.0137824	99	10Archaea 8,687Bacteria 12Eukaryota
2'-deoxynucleoside 5'-phosphate N-hydrolase 1	Positively correlated	0.124929	0.0137957	99	719Archaea 4,702Bacteria 570Eukaryota
Acyl transferase	Positively correlated	0.124838	0.0138659	99	5,954Archaea 506,337Bacteria 122,589Eukaryota
ATP-dependent (S)-NAD(P)H-hydrate dehydratase	Negatively correlated	-0.124817	0.013882
Glucosyltransferase 3	Negatively correlated	-0.124498	0.0141292	100	144Archaea 36,312Bacteria 39,271Eukaryota
Coenzyme F420 hydrogenase subunit alpha	Positively correlated	0.12442	0.01419	98	2,298Archaea 7,089Bacteria 3Eukaryota
Exosome complex component Rrp42	Positively correlated	0.124411	0.0141967	100	7,862Archaea 33Bacteria 3,637Eukaryota
Acireductone dioxygenase	Positively correlated	0.12415	0.0144028	100	15Archaea 6,153Bacteria 4,259Eukaryota
Undecaprenyl-phosphate 4-deoxy-4-formamido-L-arabinose transferase	Negatively correlated	-0.12398	0.0145382	99	7,537Archaea 122,049Bacteria 78Eukaryota
Formate dehydrogenase, mitochondrial	Negatively correlated	-0.123826	0.0146621	98	4,863Archaea 34,649Bacteria 8,901Eukaryota
Tetrahydromethanopterin S-methyltransferase subunit D	Positively correlated	0.123709	0.0147569	100	462Archaea99% 3Bacteria1%
Heme oxygenase (staphylobilin-producing)	Negatively correlated	-0.123672	0.0147869	100	6Archaea 1,276Bacteria
Rhomboid protease GlpG	Negatively correlated	-0.123417	0.0149952	99	1,573Archaea 19,192Bacteria 156Eukaryota
Uroporphyrinogen-III C-methyltransferase	Negatively correlated	-0.123352	0.0150484	100	1,538Archaea 52,376Bacteria 1,955Eukaryota
Thiamine thiazole synthase	Negatively correlated	-0.123332	0.0150651	99	2,644Archaea 69,132Bacteria 4,159Eukaryota
Oligoribonuclease	Negatively correlated	-0.123323	0.0150729	99	6,197Archaea 61,251Bacteria 4,256Eukaryota
Urease accessory protein UreD	Negatively correlated	-0.123299	0.0150927	100	554Archaea 41,576Bacteria 2,082Eukaryota
30S ribosomal protein S27e	Positively correlated	0.123291	0.0150988	99	2,966Archaea 103Bacteria 1Eukaryota
3'-5' exonuclease DinG	Negatively correlated	-0.123084	0.0152714	100	1Archaea 4,568Bacteria 9Eukaryota
Putative septation protein SpoVG	Negatively correlated	-0.123044	0.015305	99	10Archaea 4,683Bacteria
Exosome complex component Csl4	Positively correlated	0.122899	0.0154267	100	6,849Archaea 9Bacteria 3,681Eukaryota
Ribonuclease P protein component 4	Positively correlated	0.122758	0.015546	99	8,111Archaea 38,465Bacteria 515Eukaryota
SAMP-activating enzyme E1	Negatively correlated	-0.122705	0.0155912	100	47Archaea76% 15Bacteria24%
Cell division suppressor protein YneA	Negatively correlated	-0.122498	0.0157675	97	1Archaea 467Bacteria
Phosphoglycolate phosphatase	Negatively correlated	-0.122371	0.0158777	99	7,409Archaea 109,794Bacteria 4,577Eukaryota
Pyrophosphate--fructose 6-phosphate 1-phosphotransferase	Negatively correlated	-0.122324	0.015918	99	215Archaea 16,712Bacteria 2,385Eukaryota
Transducer protein MpcT	Negatively correlated	-0.122319	0.0159221	100	21Archaea91% 2Bacteria9%
Sulfhydrogenase 1 subunit alpha	Negatively correlated	-0.122222	0.0160068	100	46Archaea94% 3Bacteria6%
Ni-sirohydrochlorin a,c-diamide reductive cyclase complex, component CfbD	Positively correlated	0.122149	0.0160708	99	543Archaea 577Bacteria
Dihydrolipoyl dehydrogenase	Positively correlated	0.122138	0.0160802	99	2,788Archaea 116,248Bacteria 9,505Eukaryota
Proteasome-associated ATPase	Negatively correlated	-0.122085	0.0161266	99	56Archaea 16,254Bacteria 456Eukaryota
tRNA(Phe) (4-demethylwyosine(37)-C(7)) aminocarboxypropyltransferase	Positively correlated	0.121984	0.016215
L-ectoine synthase	Negatively correlated	-0.121972	0.0162255	100	58Archaea 9,098Bacteria 109Eukaryota
3-hydroxy-3-methylglutaryl-coenzyme A reductase	Positively correlated	0.121768	0.0164065	99	2,934Archaea 9,536Bacteria 8,221Eukaryota
Oxygen-dependent coproporphyrinogen-III oxidase	Positively correlated	0.121648	0.0165136	100	141Archaea 28,744Bacteria 3,737Eukaryota
Malonate decarboxylase acyl carrier protein	Positively correlated	0.121632	0.0165273	100	16Archaea 6,820Bacteria 6Eukaryota
Deoxyguanosinetriphosphate triphosphohydrolase	Positively correlated	0.121555	0.0165964	99	178Archaea 34,163Bacteria 38Eukaryota
Polyamine aminopropyltransferase 2	Positively correlated	0.121538	0.0166122	100	37Archaea 164,314,094Bacteria 10Eukaryota
Methyl-coenzyme M reductase I operon protein D	Positively correlated	0.121503	0.0166441	100	100% archaea
L-aspartate/L-glutamate decarboxylase	Positively correlated	0.121465	0.0166781	100	19Archaea 6,895Bacteria 3,474Eukaryota
30S ribosomal protein S27ae	Positively correlated	0.121219	0.0169013	99	2,924Archaea 152Bacteria 14Eukaryota
Protein ApaG	Positively correlated	0.121177	0.0169396	99	9Archaea 14,922Bacteria 4,132Eukaryota
2-isopropylmalate synthase	Negatively correlated	-0.121048	0.0170578	99	4,460Archaea 76,175Bacteria 3,567Eukaryota
tRNA pseudouridine synthase A	Negatively correlated	-0.121043	0.0170625	99	1,854Archaea 51,043Bacteria 21,703Eukaryota
Ferredoxin:CoB-CoM heterodisulfide reductase subunit A	Positively correlated	0.120836	0.0172541	98	4,556Archaea 31,750Bacteria 571Eukaryota
Bifunctional glutamine synthetase adenylyltransferase/adenylyl-removing enzyme	Negatively correlated	-0.120734	0.0173497	99	15Archaea 24,598Bacteria 26Eukaryota
LL-diaminopimelate aminotransferase	Negatively correlated	-0.120694	0.0173871	98	506Archaea 12,773Bacteria 741Eukaryota
Propionyl-CoA carboxylase, biotin carboxylase and biotin-carboxyl carrier subunit	Negatively correlated	-0.120505	0.0175648	100	15Archaea 4,129Bacteria 131Eukaryota
Hypoxanthine/guanine phosphoribosyltransferase	Negatively correlated	-0.120376	0.0176866	99	3,673Archaea 67,215Bacteria 6,134Eukaryota
DNA-directed RNA polymerase subunit D	Positively correlated	0.120302	0.0177575	84	3,470Archaea 47,352Bacteria 24,473Eukaryota
Release factor glutamine methyltransferase	Negatively correlated	-0.120256	0.0178013	99	241Archaea 56,709Bacteria 3,382Eukaryota
TATA-box-binding protein 2	Positively correlated	0.120239	0.0178173	100	4,528Archaea 164,314,094Bacteria 13,191Eukaryota
Flagellar L-ring protein	Positively correlated	0.120204	0.0178512	99	11Archaea 41,099Bacteria 42Eukaryota
L-aspartate oxidase	Negatively correlated	-0.120178	0.0178755	99	1,081Archaea 37,080Bacteria 2,944Eukaryota
DNA polymerase III PolC-type	Negatively correlated	-0.120154	0.0178989	99	24Archaea 29,107Bacteria 83Eukaryota
Ribonuclease J	Negatively correlated	-0.120048	0.0180007	98	2,671Archaea 36,693Bacteria 1,262Eukaryota
Guanosine-5'-triphosphate,3'-diphosphate pyrophosphatase	Negatively correlated	-0.119935	0.0181105	100	29Archaea 6,887Bacteria 130Eukaryota
hercynylcysteine sulfoxide lyase	Negatively correlated	-0.119898	0.0181462	99	285Archaea 4,486Bacteria 3,005Eukaryota
Xylulose kinase	Negatively correlated	-0.119793	0.0182484	99	1,075Archaea 99,670Bacteria 5,818Eukaryota
Ycf48-like protein	Negatively correlated	-0.119791	0.0182504	98	294Archaea 15,481Bacteria 406Eukaryota
Acyl carrier protein phosphodiesterase	Positively correlated	0.119577	0.0184607	100	47Archaea 12,054Bacteria 1,038Eukaryota
Endonuclease 8	Positively correlated	0.119574	0.0184632	98	3,871Archaea 79,936Bacteria 23,045Eukaryota
DNA double-strand break repair nuclease NurA	Positively correlated	0.119543	0.0184943	100	2,137Archaea 1,418Bacteria 1Eukaryota
Heat shock protein HspQ	Positively correlated	0.11949	0.0185462	100	5Archaea 4,137Bacteria 2Eukaryota
RNA polymerase sigma factor RpoD	Negatively correlated	-0.119292	0.0187429	98	132Archaea 64,592Bacteria 215Eukaryota
4-hydroxy-2-oxo-heptane-1,7-dioate aldolase	Positively correlated	0.119226	0.0188091	99	57Archaea 1,885Bacteria 61Eukaryota
Methanol--corrinoid protein	Positively correlated	0.119176	0.0188596	100	204Archaea 88Bacteria
Sulfoquinovose isomerase	Negatively correlated	-0.119175	0.0188602	99	7Archaea 1,406Bacteria 5Eukaryota
Ribonuclease P protein component 3	Positively correlated	0.11911	0.0189264	100	8,477Archaea 35,782Bacteria 4,494Eukaryota
Ribonuclease E	Negatively correlated	-0.11909	0.0189461	97	1,308Archaea 102,511Bacteria 15,227Eukaryota
ATP-dependent protease ATPase subunit HslU	Positively correlated	0.119055	0.0189813	99	14Archaea 23,868Bacteria 652Eukaryota
NAD-dependent malic enzyme	Negatively correlated	-0.119009	0.0190285	99	2,336Archaea 53,013Bacteria 10,764Eukaryota
M18 family aminopeptidase 1	Negatively correlated	-0.118804	0.0192363	99	174Archaea 14,861Bacteria 5,284Eukaryota
Methanogen homoaconitase large subunit	Negatively correlated	-0.118781	0.0192607	100	100% archaea
NADPH-dependent 7-cyano-7-deazaguanine reductase	Negatively correlated	-0.118772	0.0192697	99	133Archaea 24,542Bacteria 35Eukaryota
Segregation and condensation protein A	Negatively correlated	-0.118728	0.0193148	99	4,339Archaea 73,385Bacteria 308Eukaryota
Glycosyltransferase AglJ	Negatively correlated	-0.118572	0.0194755	100	851Archaea 8Bacteria 1Eukaryota
6-hydroxymethyl-7,8-dihydropterin pyrophosphokinase	Positively correlated	0.117987	0.0200877	99	2,301Archaea 46,066Bacteria 2,138Eukaryota
7-cyano-7-deazaguanine synthase	Negatively correlated	-0.117963	0.0201139	99	4,452Archaea 114,249Bacteria 81Eukaryota
Methylmalonyl-CoA epimerase	Positively correlated	0.11795	0.0201276	99	2,650Archaea 57,685Bacteria 2,667Eukaryota
Formimidoylglutamase	Positively correlated	0.117797	0.0202905	100	216Archaea 10,600Bacteria 97Eukaryota
DNA ligase B	Positively correlated	0.11765	0.0204482	98	75,894Archaea 1,155,288Bacteria 208,817Eukaryota
50S ribosomal protein L24e	Positively correlated	0.117478	0.0206343	100	7,614Archaea 27Bacteria 48Eukaryota
UDP-N-acetylglucosamine--N-acetylmuramyl-(pentapeptide) pyrophosphoryl-undecaprenol N-acetylglucosamine transferase	Negatively correlated	-0.117476	0.0206373	99	1,486Archaea 61,308Bacteria 870Eukaryota
CCA-adding enzyme	Negatively correlated	-0.117405	0.0207142	98	3,627Archaea 81,203Bacteria 13,602Eukaryota
Non-homologous end joining protein Ku	Positively correlated	0.117368	0.020754	99	268Archaea 18,889Bacteria 1,961Eukaryota
(5-formylfuran-3-yl)methyl phosphate synthase	Positively correlated	0.117304	0.0208247	99	714Archaea 2,115Bacteria 1Eukaryota
2-phosphoglycerate kinase	Positively correlated	0.117304	0.0208247	99	4,096Archaea 55,397Bacteria 33,323Eukaryota
ORC1-type DNA replication protein 1	Positively correlated	0.117304	0.0208247	99	8,386Archaea 78Bacteria 562Eukaryota
Tetrahydromethanopterin S-methyltransferase subunit F	Positively correlated	0.117136	0.0210089	99	454Archaea 26Bacteria
Cell division protein FtsL	Negatively correlated	-0.117092	0.0210584	99	85Archaea 62,003Bacteria 177Eukaryota
Flagellar P-ring protein	Positively correlated	0.117006	0.0211536	100	14Archaea 55,743Bacteria 58Eukaryota
ATP-dependent helicase/nuclease subunit A	Negatively correlated	-0.116963	0.0212014	100	81Archaea 41,314Bacteria 321Eukaryota
Glutamine-dependent NAD(+) synthetase	Negatively correlated	-0.116694	0.0215023
O-phospho-L-seryl-tRNA:Cys-tRNA synthase 1	Positively correlated	0.116651	0.0215511
Signal recognition particle 19 kDa protein	Positively correlated	0.116623	0.0215827	100	1,872Archaea 3,375Bacteria 3,602Eukaryota
3-methylornithine synthase	Negatively correlated	-0.116617	0.0215885	99	813Archaea 5,327Bacteria 67Eukaryota
30S ribosomal protein S17e	Positively correlated	0.116612	0.0215943	99	2,882Archaea 55Bacteria 6Eukaryota
Guanylate kinase	Negatively correlated	-0.116514	0.0217061	99	373Archaea 58,510Bacteria 76,194Eukaryota
Fructose-1,6-bisphosphatase class 3	Negatively correlated	-0.116466	0.02176	100	758Archaea 40,801Bacteria 6,260Eukaryota
Oxaloacetate decarboxylase	Positively correlated	0.116371	0.0218686	99	3,145Archaea 134,156Bacteria 1,629Eukaryota
50S ribosomal protein L18Ae	Positively correlated	0.116224	0.0220367	100	2,017Archaea 25Bacteria 5,065Eukaryota
Flagellar protein FliT	Positively correlated	0.116211	0.0220527	99	4Archaea 10,814Bacteria 12Eukaryota
ATP-dependent protease subunit HslV	Positively correlated	0.116198	0.0220673	99	4,325Archaea 45,408Bacteria 5,157Eukaryota
Phosphoribosylamine--glycine ligase	Negatively correlated	-0.11609	0.0221919	99	3,154Archaea 46,768Bacteria 4,655Eukaryota
ATP-dependent DNA helicase Rep	Negatively correlated	-0.115992	0.0223055	97	2,297Archaea 137,021Bacteria 3,376Eukaryota
Histidine decarboxylase	Positively correlated	0.115975	0.0223248	99	2,989Archaea 7,281Bacteria 2,188Eukaryota
Glutamine--fructose-6-phosphate aminotransferase [isomerizing]	Negatively correlated	-0.115806	0.0225228	98	4,006Archaea 57,456Bacteria 6,518Eukaryota
Ubiquinone biosynthesis accessory factor UbiJ	Positively correlated	0.115681	0.0226701	99	2Archaea 9,125Bacteria 2Eukaryota
5'-methylthioadenosine/S-adenosylhomocysteine nucleosidase	Negatively correlated	-0.11562	0.0227418	99	437Archaea 32,175Bacteria 945Eukaryota
Pyruvate/ketoisovalerate oxidoreductases common subunit gamma	Negatively correlated	-0.11557	0.0228014	100	193Archaea95% 10Bacteria5%
p-hydroxybenzoic acid efflux pump subunit AaeB	Positively correlated	0.115467	0.022923	100	3Archaea 17,523Bacteria 224Eukaryota
Acetylornithine/succinyldiaminopimelate aminotransferase	Negatively correlated	-0.115249	0.023184	100	466Archaea 21,411Bacteria 11Eukaryota
[LysW]-aminoadipate semialdehyde/glutamate semialdehyde transaminase	Negatively correlated	-0.115192	0.0232529	100	856Archaea73% 321Bacteria27%
Autonomous glycyl radical cofactor	Negatively correlated	-0.115055	0.0234187	96	3Archaea 2,453Bacteria 1Eukaryota
tRNA (uracil(54)-C(5))-methyltransferase	Negatively correlated	-0.115027	0.0234519	100	1,119Archaea 2Bacteria 1Eukaryota
NAD-dependent protein deacetylase	Negatively correlated	-0.114908	0.023597	99	1,390Archaea 41,639Bacteria 19,788Eukaryota
ECA polysaccharide chain length modulation protein	Positively correlated	0.11456	0.0240248	100	1,459Bacteria 2Eukaryota
putative protein MTH_677	Positively correlated	0.114514	0.024083
5-formaminoimidazole-4-carboxamide-1-(beta)-D-ribofuranosyl 5'-monophosphate synthetase	Positively correlated	0.114454	0.0241564
tRNA (guanine(6)-N2)-methyltransferase	Negatively correlated	-0.114432	0.0241849	98	49Archaea 358Bacteria 159Eukaryota
o-succinylbenzoate synthase	Positively correlated	0.114386	0.0242413	99	1,769Archaea 42,536Bacteria 1,230Eukaryota
Ribitol-5-phosphate cytidylyltransferase	Negatively correlated	-0.114187	0.0244914	100	74Archaea 3,366Bacteria 1,097Eukaryota
Transcription elongation factor Spt5	Positively correlated	0.114083	0.0246228	58	5,808Archaea 72Bacteria 6,223Eukaryota
HTH-type transcriptional regulator IscR	Negatively correlated	-0.113974	0.0247619	99	581Archaea 57,022Bacteria 17Eukaryota
Protein MtfA	Positively correlated	0.113969	0.0247675	99	7Archaea 10,002Bacteria 17Eukaryota
Signal recognition particle receptor FtsY	Negatively correlated	-0.113906	0.024848	99	5,733Archaea 79,484Bacteria 628Eukaryota
Transcription elongation factor Spt4	Positively correlated	0.113865	0.0249007	100	5,544Archaea 79Bacteria 4,727Eukaryota
IMP cyclohydrolase	Positively correlated	0.113858	0.0249088	98	2,539Archaea 48,539Bacteria 4,233Eukaryota
Digeranylgeranylglycerophospholipid reductase	Positively correlated	0.113754	0.0250424	98	7,410Archaea 2,424Bacteria 6Eukaryota
UDP-N-acetylmuramoyl-tripeptide--D-alanyl-D-alanine ligase	Negatively correlated	-0.113734	0.0250685	99	362Archaea 53,600Bacteria 215Eukaryota
Pyruvate kinase	Negatively correlated	-0.113673	0.0251468	99	17,984Archaea 453,510Bacteria 65,248Eukaryota
tRNA-Ser(act)	Positively correlated	0.113617	0.0252192		4Archaea≈0% 78Bacteria3% 2,849Eukaryota97%
D-serine dehydratase	Negatively correlated	-0.113594	0.0252491	99	202Archaea 24,329Bacteria 2,607Eukaryota
Protein-export protein SecB	Negatively correlated	-0.113586	0.0252601	99	14Archaea 14,862Bacteria 35Eukaryota
Bifunctional protein GlmU	Negatively correlated	-0.11358	0.0252672	98	6,531Archaea 62,045Bacteria 255Eukaryota
Protein CysO	Negatively correlated	-0.113567	0.0252845	98	2,255Archaea 12,725Bacteria 7Eukaryota
Type-2 restriction enzyme MjaII	Positively correlated	0.113563	0.0252886	100	4Archaea67% 2Bacteria33%
Thermosome subunit 2	Positively correlated	0.113563	0.0252886	10	4,590Archaea 164,314,094Bacteria 28Eukaryota
GlcNAc-binding protein A	Positively correlated	0.113457	0.025427	97	47Archaea 149,263Bacteria 39,827Eukaryota
Flavin-dependent thymidylate synthase	Negatively correlated	-0.113397	0.0255048	87	1,650Archaea 15,935Bacteria 30Eukaryota
ATP synthase subunit c	Negatively correlated	-0.113355	0.0255602	100	33,271Archaea 776,191Bacteria 2,012,767Eukaryota
H(2)/formate:CoB-CoM heterodisulfide,ferredoxin reductase subunit B1	Negatively correlated	-0.113285	0.0256515
Sulfhydrogenase 2 subunit beta	Negatively correlated	-0.113087	0.025913	100	23Archaea 164,314,094Bacteria
Transcription-repair-coupling factor	Negatively correlated	-0.112883	0.0261834	98	41Archaea 50,303Bacteria 579Eukaryota
Nucleoid-associated protein YbaB	Negatively correlated	-0.112814	0.0262756	99	34Archaea 44,150Bacteria 790Eukaryota
Sodium/glutamate symporter	Negatively correlated	-0.112813	0.0262769	100	713Archaea 86,646Bacteria 14,426Eukaryota
Cell shape-determining protein MreB	Negatively correlated	-0.112605	0.0265571	99	550Archaea 56,214Bacteria 1,642Eukaryota
Adenylosuccinate synthetase, organellar chromatophore	Negatively correlated	-0.112549	0.026633		1Archaea33% 2Eukaryota67%
UDP-N-acetylenolpyruvoylglucosamine reductase	Negatively correlated	-0.112537	0.0266497	99	51Archaea 49,279Bacteria 346Eukaryota
tRNA (guanine(37)-N1)-methyltransferase Trm5b	Positively correlated	0.112521	0.0266706
Diphthine synthase	Positively correlated	0.112468	0.026743	99	6,326Archaea 2,294Bacteria 7,694Eukaryota
DNA polymerase II large subunit	Positively correlated	0.112434	0.0267897	96	6,471Archaea 177Bacteria 5,711Eukaryota
D-cysteine desulfhydrase	Positively correlated	0.112393	0.0268449	99	260Archaea 22,214Bacteria 2,430Eukaryota
Ribosomal RNA large subunit methyltransferase F	Positively correlated	0.112297	0.0269767	100	2Archaea 5,880Bacteria 257Eukaryota
cell division protein WhiA	Negatively correlated	-0.112211	0.0270945	99	1Archaea 13,872Bacteria 1Eukaryota
CRISPR-associated endoribonuclease Cas6	Positively correlated	0.112204	0.0271046	99	911Archaea 5,958Bacteria 2Eukaryota
Proteasome subunit alpha	Positively correlated	0.11206	0.0273025	82	10,002Archaea 12,526Bacteria 46,709Eukaryota
Polyisoprenyl-teichoic acid--peptidoglycan teichoic acid transferase TagU	Negatively correlated	-0.111908	0.0275133	99	33Archaea 60,438Bacteria 13Eukaryota
Photosystem II 12 kDa extrinsic protein	Negatively correlated	-0.111767	0.0277117	99	1,340Archaea 27,050Bacteria 1,965Eukaryota
Ribosome modulation factor	Positively correlated	0.111703	0.0278009	96	8Archaea 25,613Bacteria 535Eukaryota
Protein archease	Positively correlated	0.111643	0.0278849	98	3,021Archaea 4,111Bacteria 1,840Eukaryota
3-phosphoshikimate 1-carboxyvinyltransferase	Negatively correlated	-0.111545	0.0280244	99	2,347Archaea 46,869Bacteria 2,409Eukaryota
DNA repair and recombination protein RadB	Positively correlated	0.111426	0.0281929	98	2,209Archaea 44Bacteria 71Eukaryota
Chaperone protein TorD	Negatively correlated	-0.111328	0.0283324	99	733Archaea 23,602Bacteria 13Eukaryota
ADP-specific phosphofructokinase	Positively correlated	0.111315	0.0283509	100	321Archaea80% 49Bacteria12% 33Eukaryota8%
Tungsten-containing aldehyde ferredoxin oxidoreductase	Positively correlated	0.111286	0.0283928	97	7,320Archaea 19,940Bacteria 10Eukaryota
Methylglyoxal synthase	Negatively correlated	-0.111234	0.028467	99	3,376Archaea 99,744Bacteria 11,495Eukaryota
Lipoate-protein ligase A subunit 1	Positively correlated	0.111191	0.0285285	100	74Archaea2% 2,979Bacteria97% 24Eukaryota1%
Ribosome biogenesis protein Nop10	Positively correlated	0.111131	0.0286155	100	2,080Archaea 16Bacteria 2,381Eukaryota
Endolytic murein transglycosylase	Negatively correlated	-0.111025	0.0287677	99	23Archaea 47,914Bacteria 30Eukaryota
Tyramine--L-glutamate ligase	Positively correlated	0.110974	0.028842		50Archaea 72Bacteria 1Eukaryota
ATP-dependent zinc metalloprotease FtsH	Negatively correlated	-0.110903	0.0289449	99	587Archaea 71,443Bacteria 17,391Eukaryota
Malonyl CoA reductase (NADP)	Negatively correlated	-0.110553	0.0294585	100	5Archaea 2,006Bacteria 5,097Eukaryota
AMP phosphorylase	Negatively correlated	-0.110427	0.0296453	100	3,297Archaea 41,312Bacteria 244Eukaryota
Chaperone protein DnaK	Negatively correlated	-0.11031	0.0298192	100	5,154Archaea 189,231Bacteria 6,317Eukaryota
Dolichyl N-acetyl-alpha-D-glucosaminyl phosphate 3-beta-D-2,3-diacetamido-2,3-dideoxy-beta-D-glucuronosyltransferase	Negatively correlated	-0.110276	0.0298705	100	100% archaea
Coenzyme F420 hydrogenase subunit beta	Positively correlated	0.110252	0.0299056	98	1,649Archaea 3,830Bacteria 538Eukaryota
N5-carboxyaminoimidazole ribonucleotide mutase	Negatively correlated	-0.110227	0.0299438	100	2,160Archaea 38,498Bacteria 3Eukaryota
Chaperone protein DnaJ	Negatively correlated	-0.110179	0.0300163	99	5,679Archaea 191,102Bacteria 112,676Eukaryota
Glutamate transporter	Negatively correlated	-0.110115	0.0301122	100	235Archaea 92,891Bacteria 24,638Eukaryota
Superoxide dismutase [Mn] 1	Positively correlated	0.110065	0.0301871	99	2,048Archaea 48,810Bacteria 10,057Eukaryota
UDP-N-acetylmuramoyl-L-alanyl-D-glutamate--2,6-diaminopimelate ligase	Negatively correlated	-0.109938	0.0303794	99	201Archaea 51,460Bacteria 1,000Eukaryota
Cell division protein CrgA	Negatively correlated	-0.109737	0.0306862	100	9Archaea 5,684Bacteria 1Eukaryota
Cardiolipin synthase C	Positively correlated	0.109663	0.030799	100	19Archaea 24,085Bacteria 41Eukaryota
Phosphogluconate dehydratase	Positively correlated	0.109424	0.0311679	99	169Archaea 13,148Bacteria 283Eukaryota
Regulator of ribonuclease activity A	Positively correlated	0.109354	0.0312763	99	2Archaea 4,633Bacteria 1,097Eukaryota
CRISPR-associated endonuclease Cas1	Negatively correlated	-0.109337	0.0313037	99	3,106Archaea 35,168Bacteria 12Eukaryota
RNase adapter protein RapZ	Negatively correlated	-0.109332	0.0313115	99	14Archaea 29,891Bacteria 87Eukaryota
(R)-citramalate synthase	Positively correlated	0.109245	0.0314465	98	155,755Archaea 2,769,911Bacteria 1,863,202Eukaryota
Tubulin-like protein CetZ	Negatively correlated	-0.109081	0.0317038	99	8,090Archaea 50,841Bacteria 1,930Eukaryota
Glycerol-3-phosphate dehydrogenase [NAD(P)+]	Negatively correlated	-0.108985	0.0318547
Isocitrate dehydrogenase kinase/phosphatase	Positively correlated	0.108975	0.0318707	99	3Archaea 7,013Bacteria 15Eukaryota
Mini-ribonuclease 3	Negatively correlated	-0.108953	0.0319056	100	2Archaea 7,996Bacteria 571Eukaryota
3-phenylpropionate/cinnamic acid dioxygenase subunit alpha	Positively correlated	0.108851	0.032067	100	84Archaea 13,492Bacteria 17Eukaryota
Stomatin	Negatively correlated	-0.108743	0.0322398	99	3,082Archaea 73,414Bacteria 17,477Eukaryota
Argininosuccinate lyase	Negatively correlated	-0.108698	0.0323108	99	3,161Archaea 83,389Bacteria 9,019Eukaryota
DNA gyrase subunit A	Negatively correlated	-0.108668	0.0323585	99	4,483Archaea 162,106Bacteria 6,827Eukaryota
3-isopropylmalate dehydratase large subunit	Negatively correlated	-0.108664	0.0323653	99	5,893Archaea 106,605Bacteria 14,535Eukaryota
D-xylose 1-dehydrogenase (NADP(+)) 2	Negatively correlated	-0.108618	0.032439
Ribonuclease P protein component 2	Positively correlated	0.108552	0.032546	100	4,489Archaea 164,314,094Bacteria 5,422Eukaryota
Formate--tetrahydrofolate ligase	Negatively correlated	-0.108439	0.0327271	98	1,129Archaea 35,733Bacteria 6,627Eukaryota
putative transporter in sor 3'region	Negatively correlated	-0.10841	0.032775	100	100% archaea
Putative biotin ligase	Negatively correlated	-0.108329	0.032905	99	6,600Archaea 93,344Bacteria 11,804Eukaryota
Protein DsrB	Positively correlated	0.108296	0.0329588	100	1Archaea≈0% 1,211Bacteria≈100% 2Eukaryota≈0%
Beta-ribofuranosylaminobenzene 5'-phosphate synthase	Positively correlated	0.108293	0.032965	99	1,510Archaea 1,445Bacteria
Pyridinium-3,5-bisthiocarboxylic acid mononucleotide nickel insertion protein	Negatively correlated	-0.108117	0.0332513	98	1,670Archaea 10,820Bacteria 120Eukaryota
Ornithine carbamoyltransferase, anabolic	Negatively correlated	-0.108002	0.0334401	74	1Archaea 13Bacteria
Glutamine synthetase	Negatively correlated	-0.107962	0.0335062	99	36,716Archaea 574,316Bacteria 83,447Eukaryota
Phosphopentomutase	Negatively correlated	-0.107916	0.0335819	99	96Archaea 18,338Bacteria 169Eukaryota
dTDP-4-dehydrorhamnose 3,5-epimerase	Negatively correlated	-0.107769	0.0338255	99	1,113Archaea 42,518Bacteria 392Eukaryota
tRNA uridine 5-carboxymethylaminomethyl modification enzyme MnmG	Negatively correlated	-0.107713	0.033919	99	41Archaea 37,720Bacteria 3,487Eukaryota
30S ribosomal protein S6e	Positively correlated	0.107581	0.0341395	99	3,119Archaea 31Bacteria 5Eukaryota
NAD(P)H-quinone oxidoreductase subunit 4L, chloroplastic	Positively correlated	0.107512	0.034256	100	6Archaea 7Bacteria 9,517Eukaryota
primosomal protein N'	Negatively correlated	-0.107469	0.0343287	99	46Archaea 66,718Bacteria 57Eukaryota
2-oxoglutarate dehydrogenase E1 component	Positively correlated	0.107373	0.0344895	99	200Archaea 36,915Bacteria 7,318Eukaryota
(4-{4-[2-(gamma-L-glutamylamino)ethyl]phenoxymethyl}furan-2-yl)methanamine synthase	Positively correlated	0.106965	0.0351856
Holliday junction resolvase Hjc	Positively correlated	0.106965	0.0351856	98	1,870Archaea 58Bacteria
Light-independent protochlorophyllide reductase iron-sulfur ATP-binding protein	Negatively correlated	-0.106939	0.0352312	100	1,103Archaea 52,275Bacteria 4,009Eukaryota
Pup--protein ligase	Negatively correlated	-0.106863	0.0353615	98	147Archaea 11,307Bacteria 5Eukaryota
Epoxyqueuosine reductase	Positively correlated	0.106857	0.0353717	99	1,133Archaea 42,125Bacteria 122Eukaryota
Peptide chain release factor subunit 1	Positively correlated	0.106832	0.0354143	69	3,724Archaea 40,621Bacteria 6,442Eukaryota
Replication factor A	Positively correlated	0.106758	0.035543	76	13,068Archaea 120,868Bacteria 85,770Eukaryota
peptidoglycan glycosyltransferase FtsW	Negatively correlated	-0.106677	0.0356839	99	55Archaea 98,449Bacteria 90Eukaryota
Carbamoyl-phosphate synthase small chain	Negatively correlated	-0.106539	0.035925	99	4,545Archaea 76,401Bacteria 11,354Eukaryota
putative Nudix hydrolase NudL	Positively correlated	0.106534	0.0359334	92	23Archaea 422Bacteria 6Eukaryota
8-amino-7-oxononanoate synthase	Positively correlated	0.106531	0.0359393	99	1,861Archaea 91,988Bacteria 20,178Eukaryota
Cell division protein FtsP	Positively correlated	0.106495	0.0360015	100	19Archaea 2,990Bacteria 4Eukaryota
L-alanine exporter AlaE	Positively correlated	0.106485	0.0360188	100	48Archaea 1,510Bacteria
Peptidoglycan glycosyltransferase MrdB	Negatively correlated	-0.106331	0.0362908	99	20Archaea 40,666Bacteria 31Eukaryota
Glucose-1-phosphate adenylyltransferase	Negatively correlated	-0.106328	0.036296	99	139Archaea 34,436Bacteria 3,573Eukaryota
Holliday junction ATP-dependent DNA helicase RuvB	Negatively correlated	-0.106311	0.0363264	99	194Archaea 88,123Bacteria 61Eukaryota
CRISPR-associated endonuclease Cas1 2	Negatively correlated	-0.106223	0.0364807	100	2,796Archaea 164,314,094Bacteria 4Eukaryota
Endoribonuclease Nob1	Positively correlated	0.10611	0.0366823	100	112Archaea96% 3Bacteria3% 2Eukaryota2%
6,7-dimethyl-8-ribityllumazine synthase	Negatively correlated	-0.106101	0.0366976	99	2,121Archaea 41,360Bacteria 2,893Eukaryota
Nascent polypeptide-associated complex protein	Positively correlated	0.10606	0.0367718	100	2,709Archaea 82Bacteria 7,908Eukaryota
GTP cyclohydrolase 1	Negatively correlated	-0.106012	0.0368577	99	7,779Archaea 166,521Bacteria 14,827Eukaryota
Regulatory protein RecX	Negatively correlated	-0.105921	0.0370207	99	170Archaea 36,718Bacteria 482Eukaryota
Tryptophan synthase beta chain 1	Negatively correlated	-0.105873	0.0371069	99	14,087Archaea 291,816Bacteria 27,407Eukaryota
Gamma-glutamyl phosphate reductase	Negatively correlated	-0.105728	0.0373687	99	2,520Archaea 78,704Bacteria 5,154Eukaryota
DNA mismatch repair protein MutL	Negatively correlated	-0.105592	0.0376157	99	1,495Archaea 39,978Bacteria 17,411Eukaryota
33 kDa chaperonin	Negatively correlated	-0.105534	0.0377215	100	3Archaea 39,950Bacteria 268Eukaryota
Glycine cleavage system H protein	Positively correlated	0.105432	0.0379067	88	5,821Archaea 148,218Bacteria 11,445Eukaryota
Citrate lyase acyl carrier protein	Positively correlated	0.105239	0.0382611	100	20Archaea 5,493Bacteria 6Eukaryota
Assimilatory nitrate reductase	Negatively correlated	-0.105156	0.0384147	96	118Archaea 8,291Bacteria 260Eukaryota
NADH pyrophosphatase	Negatively correlated	-0.105147	0.0384315	99	236Archaea 21,500Bacteria 4,532Eukaryota
Aspartate--tRNA(Asp/Asn) ligase	Negatively correlated	-0.105103	0.038513	99	6,478Archaea 50,961Bacteria 8,836Eukaryota
Peptide deformylase	Negatively correlated	-0.105057	0.038599	99	460Archaea 107,763Bacteria 3,538Eukaryota
tRNA (guanine-N(7)-)-methyltransferase	Negatively correlated	-0.104897	0.0388975
Histidine--tRNA ligase	Negatively correlated	-0.104855	0.0389762	99	6,742Archaea 88,421Bacteria 10,995Eukaryota
Trp operon repressor	Positively correlated	0.104776	0.0391254	100	1Archaea 3,633Bacteria
UvrABC system protein B	Negatively correlated	-0.104747	0.0391786	98	1,848Archaea 52,643Bacteria 194Eukaryota
Trehalose synthase	Negatively correlated	-0.104637	0.0393871	100	977Archaea 34,800Bacteria 12,605Eukaryota
Formylmethanofuran--tetrahydromethanopterin formyltransferase	Positively correlated	0.104636	0.0393884	98	1,336Archaea 1,878Bacteria
putative 6-oxopurine nucleoside phosphorylase	Negatively correlated	-0.104521	0.0396071	95	17Archaea 2Eukaryota
HTH-type transcriptional regulator MalT	Negatively correlated	-0.104402	0.0398349	99	133Archaea 9,523Bacteria 86Eukaryota
50S ribosomal protein L30	Positively correlated	0.10435	0.0399337	100	2,995Archaea 33,645Bacteria 129Eukaryota
F(420)H(2) dehydrogenase subunit N	Positively correlated	0.104186	0.040248	99	278Archaea 9Bacteria 25Eukaryota
Archaeal histone A2	Positively correlated	0.104149	0.0403189	95	38Archaea 4Eukaryota
NAD(P)H-quinone oxidoreductase subunit 2, chloroplastic	Positively correlated	0.104039	0.0405317	100	67Archaea 6,797Bacteria 27,739Eukaryota
Ribosomal RNA small subunit methyltransferase A	Negatively correlated	-0.104005	0.0405981	100	3,216Archaea 44,680Bacteria 1,608Eukaryota
1,4-dihydroxy-2-naphthoyl-CoA synthase	Positively correlated	0.103963	0.0406794	98	523Archaea 17,614Bacteria 568Eukaryota
[5-(aminomethyl)furan-3-yl]methyl phosphate kinase	Positively correlated	0.103844	0.0409114
phosphatase YcdX	Negatively correlated	-0.103811	0.0409761	99	2,482Archaea 21,051Bacteria 4Eukaryota
Protein-methionine-sulfoxide reductase catalytic subunit MsrP	Positively correlated	0.103789	0.0410201	99	12Archaea 21,605Bacteria 16Eukaryota
tRNA-SeC(tca)	Positively correlated	0.103716	0.0411619	99	12Archaea 21,605Bacteria 16Eukaryota
Methyl-coenzyme M reductase subunit alpha	Positively correlated	0.103653	0.0412872	99	22,214Archaea 1,243Bacteria 3Eukaryota
Phosphodiesterase	Negatively correlated	-0.103603	0.0413845	99	29,993Archaea 899,593Bacteria 233,593Eukaryota
Regulator of nucleoside diphosphate kinase	Positively correlated	0.103548	0.0414932	99	1Archaea 8,998Bacteria 40Eukaryota
Deglycase PfpI	Negatively correlated	-0.103529	0.0415312	100	1,547Archaea 50,657Bacteria 6,049Eukaryota
Ribonuclease H	Negatively correlated	-0.103521	0.0415469	85	25,741Archaea 814,726Bacteria 690,253Eukaryota
Glucose import system permease protein GlcT	Negatively correlated	-0.103489	0.0416115	99	395Archaea 10,302Bacteria 2Eukaryota
PKHD-type hydroxylase YbiX	Positively correlated	0.103245	0.0420963	99	11Archaea 7,687Bacteria 9Eukaryota
[LysW]-aminoadipate/[LysW]-glutamate kinase	Negatively correlated	-0.103122	0.0423438	99	1,138Archaea 1,138Bacteria
Tetrahydromethanopterin S-methyltransferase subunit A 1	Positively correlated	0.103081	0.0424254	100	100%archaea
DNA replication and repair protein RecF	Negatively correlated	-0.103076	0.0424352	99	254Archaea 89,590Bacteria 955Eukaryota
Ribosomal RNA small subunit methyltransferase G	Negatively correlated	-0.103066	0.0424559	100	7Archaea 66,256Bacteria 442Eukaryota
60 kDa chaperonin	Negatively correlated	-0.103023	0.0425435	99	477Archaea 86,634Bacteria 10,369Eukaryota
Aspartate carbamoyltransferase	Negatively correlated	-0.102939	0.0427122	98	8,834Archaea 102,316Bacteria 7,370Eukaryota
Quinolinate synthase A	Negatively correlated	-0.102936	0.0427184	98	2,296Archaea 32,326Bacteria 608Eukaryota
Lactaldehyde dehydrogenase	Positively correlated	0.102811	0.0429733	99	318Archaea 5,315Bacteria 332Eukaryota
dITP/XTP pyrophosphatase	Negatively correlated	-0.1027	0.043199	99	1,174Archaea 40,750Bacteria 2,812Eukaryota
Deoxyguanosinetriphosphate triphosphohydrolase-like protein	Negatively correlated	-0.102651	0.0433007	99	137Archaea 31,185Bacteria 31Eukaryota
Hercynine oxygenase	Positively correlated	0.102648	0.0433059	99	226Archaea 11,662Bacteria 17Eukaryota
tRNA-specific adenosine deaminase	Negatively correlated	-0.102564	0.0434774	99	3,746Archaea 45,657Bacteria 11,168Eukaryota
HPr kinase/phosphorylase	Negatively correlated	-0.102465	0.0436831	99	148Archaea 20,309Bacteria 22Eukaryota
Type-2 restriction enzyme MthTI	Negatively correlated	-0.102454	0.0437058	100	1Archaea50% 1Bacteria50%
DNA repair protein RecO	Negatively correlated	-0.102357	0.0439051	99	33Archaea 86,062Bacteria 62Eukaryota
putative L-aspartate dehydrogenase	Negatively correlated	-0.102273	0.0440798	99	57Archaea 38,496Bacteria 530Eukaryota
Iron-sulfur cluster carrier protein	Negatively correlated	-0.102272	0.0440823	100	4,614Archaea 149,761Bacteria 5,104Eukaryota
Cardiolipin synthase B	Positively correlated	0.102235	0.0441585	100	14Archaea 7,913Bacteria 27Eukaryota
Peptidoglycan D,D-transpeptidase MrdA	Negatively correlated	-0.102079	0.0444864	99	36Archaea 46,979Bacteria 52Eukaryota
Ion-translocating oxidoreductase complex subunit G	Negatively correlated	-0.101969	0.0447165	99	125Archaea 15,315Bacteria 5Eukaryota
Acid shock protein	Positively correlated	0.101952	0.0447514	99	517Archaea 46,052Bacteria 9,762Eukaryota
dTDP-fucosamine acetyltransferase	Positively correlated	0.101937	0.044785	100	7Archaea 1,935Bacteria
Prokaryotic ubiquitin-like protein Pup	Negatively correlated	-0.1018	0.0450744	100	5Archaea 9,549Bacteria 3Eukaryota
acetoacetate decarboxylase	Positively correlated	0.101788	0.0450991	99	1,202Archaea 16,234Bacteria 2,460Eukaryota
Alpha-galactosidase	Negatively correlated	-0.101756	0.0451678	99	5,695Archaea 88,095Bacteria 17,073Eukaryota
Alkanesulfonate monooxygenase	Positively correlated	0.101709	0.0452678	99	1,659Archaea 117,030Bacteria 3,461Eukaryota
Polyferredoxin protein MvhB	Positively correlated	0.101673	0.0453431	99	605Archaea 8Bacteria
1-pyrroline-5-carboxylate dehydrogenase	Positively correlated	0.101664	0.0453627	99	2,845Archaea 133,945Bacteria 26,979Eukaryota
Protein YceI	Positively correlated	0.101642	0.0454102	99	144Archaea 63,723Bacteria 157Eukaryota
tRNA-specific 2-thiouridylase MnmA	Negatively correlated	-0.101635	0.0454244	99	145Archaea 46,973Bacteria 2,936Eukaryota
Tyrosine phenol-lyase	Positively correlated	0.101603	0.0454924	99	82Archaea 2,616Bacteria 5Eukaryota
50S ribosomal protein L31e	Positively correlated	0.101492	0.0457313	99	2,996Archaea 34Bacteria 108Eukaryota
7,8-dihydro-6-hydroxymethylpterin dimethyltransferase	Positively correlated	0.101417	0.0458919	98	2,257Archaea 3,811Bacteria 9Eukaryota
ATP-dependent RNA helicase DeaD	Negatively correlated	-0.101313	0.0461166	94	7,647Archaea 233,617Bacteria 194,346Eukaryota
4-hydroxy-3-methylbut-2-en-1-yl diphosphate synthase (ferredoxin)	Negatively correlated	-0.101298	0.0461474	98	72Archaea 39,438Bacteria 921Eukaryota
Serine/threonine transporter SstT	Negatively correlated	-0.101257	0.046238	99	34Archaea 7,936Bacteria 12Eukaryota
Ribonuclease P protein component	Negatively correlated	-0.101216	0.0463254	99	11,086Archaea 42,201Bacteria 12,711Eukaryota
Tol-Pal system protein TolQ	Positively correlated	0.101212	0.0463349	100	15Archaea 57,320Bacteria 29Eukaryota
Glycerol-1-phosphate dehydrogenase [NAD(P)+]	Negatively correlated	-0.101131	0.046511
2,3-diketo-5-methylthiopentyl-1-phosphate enolase	Negatively correlated	-0.101096	0.0465862	100	2Archaea 5,086Bacteria 1,364Eukaryota
Putative gamma-glutamylcyclotransferase	Positively correlated	0.101016	0.0467619	99	72Archaea 1,422Bacteria 3,340Eukaryota
putative cobalt-precorrin-6B C(15)-methyltransferase (decarboxylating)	Negatively correlated	-0.100988	0.0468232
UDP-N-acetyl-D-mannosamine dehydrogenase	Positively correlated	0.10084	0.0471477	98	3,462Archaea 35,436Bacteria 821Eukaryota
Glutamyl-Q tRNA(Asp) synthetase	Negatively correlated	-0.100807	0.0472203	99	9Archaea 20,479Bacteria 37Eukaryota
Potassium-transporting ATPase KdpC subunit	Positively correlated	0.100798	0.0472402	100	422Archaea 48,232Bacteria 13Eukaryota
Ribosomal RNA large subunit methyltransferase I	Negatively correlated	-0.100614	0.047648	99	47Archaea 10,185Bacteria 1,627Eukaryota
tRNA(Ile)-lysidine synthase	Negatively correlated	-0.100585	0.0477117	100	5Archaea3% 55Bacteria37% 89Eukaryota60%
Pantothenate synthetase	Negatively correlated	-0.100582	0.047718	99	4,078Archaea 71,668Bacteria 5,354Eukaryota
Sec-independent protein translocase protein TatE	Positively correlated	0.100521	0.0478538	100	6Archaea 1,106Bacteria 1Eukaryota
3'-5' exoribonuclease YhaM	Negatively correlated	-0.100473	0.0479614	99	559Archaea 10,087Bacteria 12Eukaryota
4-hydroxybutyrate--CoA ligase 2	Negatively correlated	-0.100447	0.0480192	100	5Archaea 164,314,094Bacteria 4Eukaryota
Pyrimidine monooxygenase RutA	Positively correlated	0.100413	0.0480963	100	5Archaea 2,289Bacteria 72Eukaryota
Glycogen synthase	Negatively correlated	-0.100384	0.0481614	99	2,504Archaea 112,266Bacteria 51,552Eukaryota
Nucleoside permease NupG	Positively correlated	0.100323	0.0482976	99	5Archaea 9,252Bacteria 8Eukaryota
Argininosuccinate synthase	Negatively correlated	-0.100308	0.0483303	99	2,233Archaea 40,710Bacteria 4,182Eukaryota
Putative branched-chain-amino-acid aminotransferase	Negatively correlated	-0.100288	0.0483759	96	8Archaea 145Bacteria 219Eukaryota
RIO-type serine/threonine-protein kinase Rio1	Positively correlated	0.100254	0.0484516	100	4,416Archaea 5,326Bacteria 9,035Eukaryota
Cysteine desulfurase	Negatively correlated	-0.100164	0.0486549	99	8,868Archaea 187,360Bacteria 10,952Eukaryota
Serine/threonine-protein kinase ArnS	Negatively correlated	-0.100137	0.0487169	100	100% archaea
D-proline dehydrogenase	Positively correlated	0.100106	0.0487861	99	23Archaea 148Bacteria 131Eukaryota
Gentisate 1,2-dioxygenase	Positively correlated	0.100052	0.0489086	100	62Archaea 3,833Bacteria 208Eukaryota
Universal stress protein B	Positively correlated	0.0999345	0.0491766	100	13,904Archaea 110,908Bacteria 9,687Eukaryota
Vitamin B12 import system permease protein BtuC	Negatively correlated	-0.0998264	0.0494238	99	3,571Archaea 68,032Bacteria 26Eukaryota
F(420)H(2) dehydrogenase subunit F	Negatively correlated	-0.0997148	0.0496799	99	891Archaea 4Bacteria 13Eukaryota
2-keto-4-pentenoate hydratase	Positively correlated	0.0996903	0.0497362	99	511Archaea 35,978Bacteria 336Eukaryota
7,8-didemethyl-8-hydroxy-5-deazariboflavin synthase	Negatively correlated	-0.0996239	0.0498892	99	2,373Archaea 7,336Bacteria 71Eukaryota
tR+1:736NA-dihydrouridine synthase B	Negatively correlated	-0.0995925	0.0499617	99	97Archaea 8,502Bacteria 130Eukaryota
